# Supplementary material for: Efficient synthesis of chiral 2,3-dihydro-benzo[b]thiophene 1,1-dioxides via Rh-catalyzed hydrogenation
Source: PubMed Central journal article supplement (PMC6385876; doi:10.1039/c8sc05397a), 2019-01-15
Supplement: SC-010-C8SC05397A-s001.pdf [file SC-010-C8SC05397A-s001.pdf]

*Supporting information*

**Efficient Synthesis of Chiral 2,3-Dihydro-benzo[*b*]thiophene  
1,1-Dioxides via Rh-Catalyzed Hydrogenation**

Gongyi Liu,<sup>†</sup> Heng Zhang,<sup>†</sup> Yi Huang,<sup>†</sup> Zhengyu Han,<sup>†</sup> Gang Liu,<sup>†</sup> Yuanhua Liu,<sup>†</sup> Xiu-Qin  
Dong,<sup>\*†</sup> and Xumu Zhang<sup>\*§,†</sup>

<sup>†</sup> Key Laboratory of Biomedical Polymers, Engineering Research Center of Organosilicon  
Compounds & Materials, Ministry of Education, College of Chemistry and Molecular Sciences,  
Wuhan University, Wuhan, Hubei, 430072, P. R. China.

<sup>§</sup> Department of Chemistry and Shenzhen Grubbs Institute, Southern University of Science and  
Technology, Shenzhen, Guangdong, 518055, P. R. China.

**Contents**

|                                                          |     |
|----------------------------------------------------------|-----|
| 1. General remarks.....                                  | 2   |
| 2. General procedure for the synthesis of substrate..... | 2   |
| 3. General procedure for asymmetric hydrogenation.....   | 17  |
| 4. General procedure for the high TON experiment.....    | 31  |
| 5. General procedure for Job plot.....                   | 31  |
| 6. General computational calculation (DFT) details.....  | 33  |
| 7. Reference.....                                        | 52  |
| 8. NMR spectra.....                                      | 54  |
| 9. HPLC spectra.....                                     | 106 |

## 1. General remarks

Unless otherwise noted, all reagents and solvents were purchased from commercial suppliers and used without further purification. Anhydrous solvents were purchased from Sigma-Aldrich, J&K Chemical Technology company, and transferred by syringe.  $^1\text{H}$  NMR and  $^{13}\text{C}$  NMR spectra were recorded on a Bruker ADVANCE III (400 MHz) spectrometer with  $\text{CDCl}_3$  as the solvent and tetramethylsilane (TMS) as the internal standard. Chemical shifts are reported in parts per million (ppm,  $\delta$  scale) downfield from TMS at 0.00 ppm and referenced to the  $\text{CDCl}_3$  at 7.26 ppm (for  $^1\text{H}$  NMR) or 77.0 ppm (for  $^{13}\text{C}$  NMR). Data are reported as: multiplicity (s = singlet, d = doublet, t = triplet, q = quartet, m = multiplet), coupling constant in hertz (Hz) and signal area integration in natural numbers.  $^{13}\text{C}$  NMR analyses were run with decoupling. Enantiomeric excess values were determined by Daicel chiral column on an Agilent 1260 Series HPLC instrument. Optical rotations  $[\alpha]_D$  were measured on a PERKIN ELMER polarimeter 343 instrument. Column Chromatography was performed with silica gel (300-400 mesh).

## 2. General procedure for the synthesis of substrate

**The substrates of aryl-substituted benzothiophene 1,1-dioxides according were synthesized to the method A:**

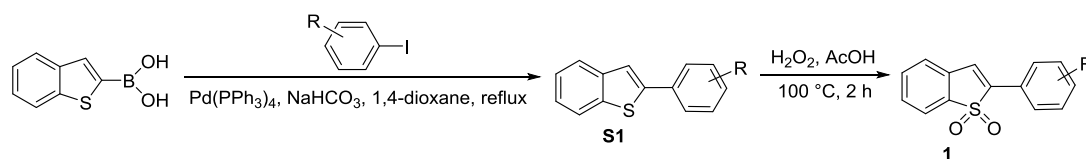

Step 1:<sup>[1-2]</sup> Aromatic iodide (10.00 mmol, 1.0 eq.) was added under argon at r.t. to a solution of Pd(PPh<sub>3</sub>)<sub>4</sub> (58 mg, 0.05 mmol, 0.005 eq.) in dry 1,4-dioxane (50 mL) and stirred for 20 min. After this time saturated NaHCO<sub>3</sub> (aq., 14.0 mL) and commercially available 1-benzothiophene-2-boronic acid (979 mg, 11.0 mmol, 1.1 eq.) were added and the resulting reaction mixture was refluxed overnight. The reaction mixture was then allowed to cool to r.t. and diluted with H<sub>2</sub>O (80 mL) and extracted with CH<sub>2</sub>Cl<sub>2</sub> (3×60 mL). The combined organic extracts were washed with NaOH (aq. 1 M, 40 mL)

and then with brine, dried over  $\text{MgSO}_4$  and concentrated in vacuo to give a brown crystalline solid that was purified by flash chromatography to give the corresponding product **S1**.

Step 2:<sup>[3]</sup> **S1** (1.00 eq.) was suspended in glacial AcOH (concentration  $\approx 0.9$  M) and  $\text{H}_2\text{O}_2$  (30% aq. solution, 6.5 eq.) was slowly added. The mixture was heated to  $100\text{ }^\circ\text{C}$  and, at this temperature, it became a clear solution. Stirring at  $100\text{ }^\circ\text{C}$  was continued for 3 h and GC-MS analysis showed full conversion. The mixture was allowed to cool to r.t. and partitioned between  $\text{CH}_2\text{Cl}_2$  and saturated  $\text{NaHCO}_3$  (aq. so to bring the pH of the aq. phase to  $\approx 9$ ), the layers were separated and the aq. phase was extracted three times with  $\text{CH}_2\text{Cl}_2$ . The combined organic extracts were dried over  $\text{MgSO}_4$  and concentrated in vacuo to give the crude product that was purified by flash chromatography (silica gel, petroleum ether–EtOAc).

#### 2-phenylbenzo[*b*]thiophene 1,1-dioxide **1a**

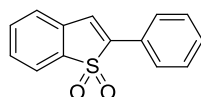

White crystalline solid;  $^1\text{H}$  NMR (400 MHz,  $\text{CDCl}_3$ )  $\delta$  7.85-7.83 (m, 2H), 7.77 (d,  $J = 7.6$  Hz, 1H), 7.57 (t,  $J = 7.6$  Hz, 1H), 7.52-7.45 (m, 4H), 7.44-7.40 (m, 1H), 7.29 (s, 1H);  $^{13}\text{C}$  NMR (100 MHz,  $\text{CDCl}_3$ )  $\delta$  142.54, 137.02, 133.76, 131.10, 130.34, 129.91, 129.22, 127.10, 126.52, 125.02, 123.66, 121.48. The characterization data of compound **1a** is in accordance with the reported data in the literature.<sup>[2]</sup>

#### 2-(4-methoxyphenyl)benzo[*b*]thiophene 1,1-dioxide **1b**

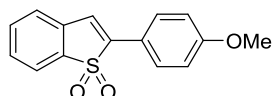

Yellow crystalline solid;  $^1\text{H}$  NMR (400 MHz,  $\text{CDCl}_3$ )  $\delta$  (ppm) 7.79-7.77 (m, 2H), 7.74 (d,  $J = 7.6$  Hz, 1H), 7.54 (t,  $J = 7.6$  Hz, 1H), 7.45 (t,  $J = 7.6$  Hz, 1H), 7.36 (d,  $J = 7.6$  Hz, 1H), 7.15 (s, 1H), 7.00-6.97 (m, 2H), 3.85 (s, 3H);  $^{13}\text{C}$  NMR (100 MHz,  $\text{CDCl}_3$ )  $\delta$  161.19, 142.23, 136.70, 133.72, 131.53, 129.36, 128.10, 124.66, 121.38, 121.25, 119.54, 114.72, 55.42. The characterization data of compound **1b** is in

accordance with the reported data in the literature.<sup>[2]</sup>

#### 2-(4-fluorophenyl)benzo[*b*]thiophene 1,1-dioxide **1c**

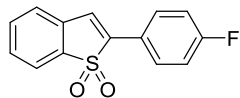

Pale yellow crystalline solid; <sup>1</sup>H NMR (400 MHz, CDCl<sub>3</sub>) δ 7.85-7.81 (m, 2H), 7.76 (d, *J* = 7.6 Hz, 1H), 7.60-7.56 (m, 1H), 7.51 (t, *J* = 7.6 Hz, 1H), 7.40 (d, *J* = 7.6 Hz, 1H), 7.23 (s, 1H), 7.20-7.15 (m, 2H); <sup>13</sup>C NMR (100 MHz, CDCl<sub>3</sub>) δ 163.77 (d, *J* = 251.0 Hz), 141.54, 136.76, 133.85, 131.00, 129.97, 128.65 (d, *J* = 9.0 Hz), 125.03, 123.51 (d, *J* = 2.0 Hz), 123.36 (d, *J* = 4.0 Hz), 121.54, 116.52 (d, *J* = 22.0 Hz). The characterization data of compound **1c** is in accordance with the reported data in the literature.<sup>[2]</sup>

#### 2-(*o*-tolyl)benzo[*b*]thiophene 1,1-dioxide **1d**

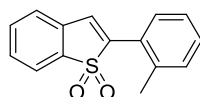

White crystalline solid; <sup>1</sup>H NMR (400 MHz, CDCl<sub>3</sub>) δ 7.77 (d, *J* = 7.2 Hz, 1H), 7.69 (d, *J* = 7.6 Hz, 1H), 7.60-7.56 (m, 1H), 7.53-7.49 (m, 1H), 7.41-7.39 (m, 1H), 7.36-7.27 (m, 3H), 7.04 (s, 1H), 2.45 (s, 3H); <sup>13</sup>C NMR (100 MHz, CDCl<sub>3</sub>) δ 142.59, 138.06, 136.29, 133.66, 131.06, 130.09, 130.06, 129.47, 128.18, 126.40, 126.19, 125.00, 121.70, 20.67. The characterization data of compound **1d** is in accordance with the reported data in the literature.<sup>[2]</sup>

#### 2-(*m*-tolyl)benzo[*b*]thiophene 1,1-dioxide **1e**

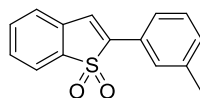

White crystalline solid; <sup>1</sup>H NMR (400 MHz, CDCl<sub>3</sub>) δ 7.76 (d, *J* = 7.6 Hz, 1H), 7.65-7.62 (m, 2H), 7.58-7.51 (m, 1H), 7.49-7.47 (m, 1H), 7.40-7.34 (m, 2H), 7.27 (s, 2H), 2.41 (s, 3H); <sup>13</sup>C NMR (100 MHz, CDCl<sub>3</sub>) δ 142.69, 139.02, 137.04, 133.72, 131.22, 129.81, 129.10, 127.00, 124.94, 123.71, 123.50, 121.46, 21.46. The

characterization data of compound **1e** is in accordance with the reported data in the literature.<sup>[2]</sup>

2-(4-(tert-butyl)phenyl)benzo[*b*]thiophene 1,1-dioxide **1f**

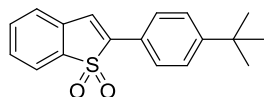

White crystalline solid; <sup>1</sup>H NMR (400 MHz, CDCl<sub>3</sub>) δ 7.79-7.75 (m, 3H), 7.59-7.55 (m, 1H), 7.51-7.47 (m, 3H), 7.40 (d, *J* = 7.2 Hz, 1H), 7.25 (s, 1H), 1.35 (s, 9H); <sup>13</sup>C NMR (100 MHz, CDCl<sub>3</sub>) δ 153.85, 142.60, 136.98, 133.72, 131.37, 129.67, 126.30, 126.26, 124.86, 124.21, 122.64, 121.48, 34.93, 31.09. HRMS calculated for C<sub>18</sub>H<sub>18</sub>NaO<sub>2</sub>S<sup>+</sup> [(M+Na)<sup>+</sup>] = 321.0922, found: 321.0919.

2-(3-chlorophenyl)benzo[*b*]thiophene 1,1-dioxide **1g**

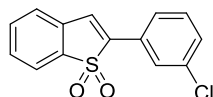

White crystalline solid; <sup>1</sup>H NMR (400 MHz, CDCl<sub>3</sub>) δ 7.78-7.73 (m, 3H), 7.61-7.57 (m, 1H), 7.57-7.51 (m, 1H), 7.44-7.42 (m, 3H), 7.32 (s, 1H); <sup>13</sup>C NMR (100 MHz, CDCl<sub>3</sub>) δ 141.24, 136.97, 135.24, 133.89, 130.70, 130.49, 130.37, 130.33, 128.80, 126.46, 125.30, 124.99, 124.66, 121.59. HRMS calculated for C<sub>14</sub>H<sub>9</sub>ClNaO<sub>2</sub>S<sup>+</sup> [(M+Na)<sup>+</sup>] = 298.9907, found: 298.9903.

2-(naphthalen-2-yl)benzo[*b*]thiophene 1,1-dioxide **1h**

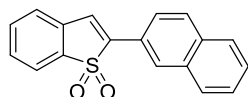

White crystalline solid; <sup>1</sup>H NMR (400 MHz, CDCl<sub>3</sub>) δ 8.15 (s, 1H), 7.91-7.80 (m, 6H), 7.68 (s, 1H), 7.54-7.47 (m, 2H), 7.39-7.31 (m, 2H); <sup>13</sup>C NMR (100 MHz, CDCl<sub>3</sub>) δ 142.56, 137.08, 133.81, 133.10, 131.24, 129.89, 129.18, 128.97, 127.72, 127.56, 126.96, 126.73, 125.03, 124.24, 123.65, 123.05, 121.52. HRMS calculated for C<sub>18</sub>H<sub>12</sub>NaO<sub>2</sub>S<sup>+</sup> [(M+Na)<sup>+</sup>] = 315.0456, found: 315.0450.

### 3-phenylbenzo[*b*]thiophene 1,1-dioxide **1m**

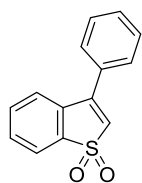

White crystalline solid;  $^1\text{H}$  NMR (400 MHz,  $\text{CDCl}_3$ )  $\delta$  7.83-7.79 (m, 1H), 7.60-7.48 (m, 8H), 6.65 (s, 1H);  $^{13}\text{C}$  NMR (100 MHz,  $\text{CDCl}_3$ )  $\delta$  145.95, 138.08, 133.29, 131.90, 130.99, 130.59, 130.47, 129.16, 127.95, 125.60, 124.28, 121.62. The characterization data of compound **1m** is in accordance with the reported data in the literature.<sup>[2]</sup>

### 3-(4-methoxyphenyl)benzo[*b*]thiophene 1,1-dioxide **1n**

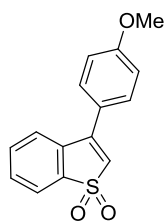

White crystalline solid;  $^1\text{H}$  NMR (400 MHz,  $\text{CDCl}_3$ )  $\delta$  7.81-7.79 (m, 1H), 7.59-7.53 (m, 3H), 7.50-7.47 (m, 2H), 7.05-7.03 (m, 2H), 6.58 (s, 1H), 3.89 (s, 3H);  $^{13}\text{C}$  NMR (100 MHz,  $\text{CDCl}_3$ )  $\delta$  161.35, 145.60, 138.24, 133.17, 132.06, 130.44, 129.47, 124.25, 124.22, 123.14, 121.50, 114.55, 55.43. The characterization data of compound **1n** is in accordance with the reported data in the literature.<sup>[2]</sup>

### 3-(*m*-tolyl)benzo[*b*]thiophene 1,1-dioxide **1o**

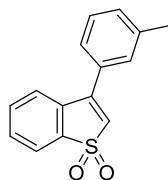

White crystalline solid;  $^1\text{H}$  NMR (400 MHz,  $\text{CDCl}_3$ )  $\delta$  7.82-7.79 (m, 1H), 7.59-7.55 (m, 2H), 7.53-7.49 (m, 1H), 7.42 (t,  $J = 7.6$  Hz, 1H), 7.33 (t,  $J = 7.2$  Hz, 3H), 6.63 (s, 1H), 2.44 (s, 3H);  $^{13}\text{C}$  NMR (100 MHz,  $\text{CDCl}_3$ )  $\delta$  146.12, 139.07, 138.10, 133.26, 132.01, 131.23, 130.94, 130.53, 129.01, 128.51, 125.39, 125.03,

124.34, 121.57, 21.45. The characterization data of compound **1o** is in accordance with the reported data in the literature.<sup>[2]</sup>

### 3-(*p*-tolyl)benzo[*b*]thiophene 1,1-dioxide **1p**

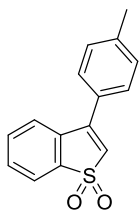

White crystalline solid; <sup>1</sup>H NMR (400 MHz, CDCl<sub>3</sub>) δ 7.81-7.79 (m, 1H), 7.58-7.56 (m, 2H), 7.53-7.50 (m, 1H), 7.42 (d, *J* = 7.6 Hz, 2H), 7.33 (d, *J* = 8.0 Hz, 2H), 6.62 (s, 1H), 2.45 (s, 3H); <sup>13</sup>C NMR (100 MHz, CDCl<sub>3</sub>) δ 145.98, 140.86, 138.16, 133.22, 132.03, 130.49, 129.82, 128.06, 127.88, 124.96, 124.29, 121.54, 21.44. The characterization data of compound **1p** is in accordance with the reported data in the literature.<sup>[2]</sup>

### 3-(4-fluorophenyl)benzo[*b*]thiophene 1,1-dioxide **1r**

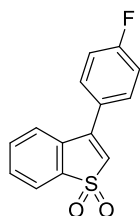

White crystalline solid; <sup>1</sup>H NMR (400 MHz, CDCl<sub>3</sub>) δ 7.82-7.80 (m, 1H), 7.60-7.58 (m, 2H), 7.54-7.46 (m, 2H), 7.47-7.46 (m, 1H), 7.25-7.21 (m, 2H), 6.64 (s, 1H); <sup>13</sup>C NMR (100 MHz, CDCl<sub>3</sub>) δ 163.91 (d, *J* = 250.0 Hz), 144.91, 138.07, 133.35, 131.74, 130.72, 129.98 (d, *J* = 8.0 Hz), 127.03 (d, *J* = 3.0 Hz), 125.77, 124.06, 121.71, 116.44 (d, *J* = 21.0 Hz). The characterization data of compound **1r** is in accordance with the reported data in the literature.<sup>[2]</sup>

### 3-(3-chlorophenyl)benzo[*b*]thiophene 1,1-dioxide **1s**

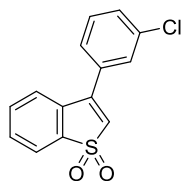

White crystalline solid;  $^1\text{H}$  NMR (400 MHz,  $\text{CDCl}_3$ )  $\delta$  (ppm) 7.81-7.80 (m, 1H), 7.61-7.59 (m, 2H), 7.52-7.40 (m, 5H), 6.68 (s, 1H);  $^{13}\text{C}$  NMR (100 MHz,  $\text{CDCl}_3$ )  $\delta$  (ppm) 144.51, 137.93, 135.23, 133.44, 132.72, 131.39, 130.83, 130.55, 130.53, 127.97, 126.53, 126.12, 124.03, 121.79. HRMS calculated for  $\text{C}_{14}\text{H}_9\text{ClNaO}_2\text{S}^+$   $[(\text{M}+\text{Na})^+] = 298.9907$ , found: 298.9903.

### 3-(4-chlorophenyl)benzo[*b*]thiophene 1,1-dioxide **1t**

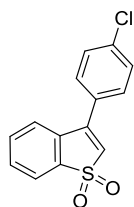

White crystalline solid;  $^1\text{H}$  NMR (400 MHz,  $\text{CDCl}_3$ )  $\delta$  (ppm) 7.82-7.80 (m, 1H), 7.60-7.58 (m, 2H), 7.53-7.44 (m, 5H), 6.66 (s, 1H);  $^{13}\text{C}$  NMR (100 MHz,  $\text{CDCl}_3$ )  $\delta$  (ppm) 144.79, 138.02, 136.68, 133.38, 131.53, 130.78, 129.52, 129.40, 129.28, 126.04, 124.02, 121.76. HRMS calculated for  $\text{C}_{14}\text{H}_9\text{ClNaO}_2\text{S}^+$   $[(\text{M}+\text{Na})^+] = 298.9908$ , found: 298.9903.

### 3-(naphthalen-2-yl)benzo[*b*]thiophene 1,1-dioxide **1u**

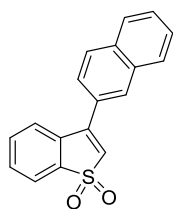

White crystalline solid;  $^1\text{H}$  NMR (400 MHz,  $\text{CDCl}_3$ )  $\delta$  (ppm) 8.03 (s, 1H), 7.98 (d,  $J = 4.2$  Hz, 1H), 7.93-7.91 (m, 2H), 7.85-7.81 (m, 1H), 7.61-7.55 (m, 6H), 6.74 (s, 1H);  $^{13}\text{C}$  NMR (100 MHz,  $\text{CDCl}_3$ )  $\delta$  (ppm) 145.97, 138.16, 133.93, 133.30, 132.96, 131.99, 130.60, 129.03, 128.39, 128.34, 127.87, 127.56, 127.11, 125.82, 124.81, 124.37, 121.62. HRMS calculated for  $\text{C}_{18}\text{H}_{12}\text{NaO}_2\text{S}^+$   $[(\text{M}+\text{Na})^+] = 315.0455$ , found: 315.0450.



**The synthesis of substrate 6-methoxy-3-phenylbenzo[*b*]thiophene 1,1-dioxide according to the method B:**

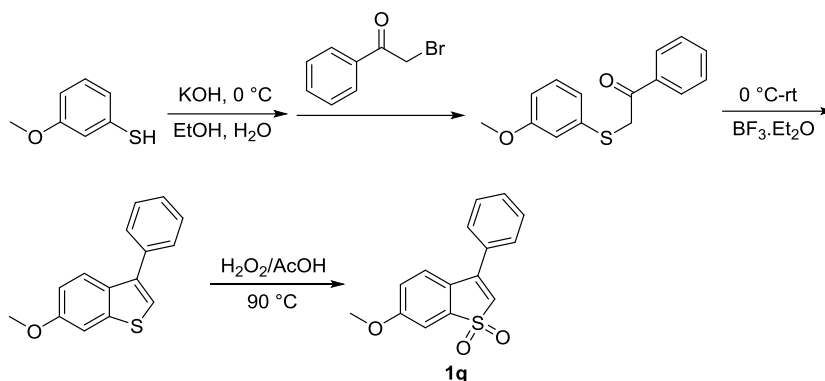

Step 1:<sup>[4]</sup> Methoxybenzenethiol (1.12 g, 8.0 mmol) was added to a round-bottom flask charged with a freshly prepared solution containing 6 mL ethanol, 14 mL water, and KOH (0.51 g, 9.0 mmol). The solution was cooled in an ice-water bath, and a solution of 2-bromo-1-phenylethan-1-one (1.59 g, 8.0 mmol) in 10 mL ethyl acetate was slowly added. The reaction mixture was monitored by TLC until completion. The solvents were evaporated under reduced pressure, and the residue mixture was partitioned between water and ethyl acetate. The combined organic phase was washed with brine, and dried by Na<sub>2</sub>SO<sub>4</sub> to give 2-((4-methoxyphenyl)thio)-1-phenylethan-1-one, which was used in the next step without further purification.

Step 2:<sup>[5]</sup> BF<sub>3</sub>·OEt<sub>2</sub> (70 mL) was slowly added to a flask charged with 2-((4-methoxyphenyl)thio)-1-phenylethan-1-one (2.0 g) under argon atmosphere in an ice bath. The reaction mixture was stirred until starting material was consumed as monitored by TLC. The reaction mixture was poured into saturated NaHCO<sub>3</sub>/ice-water, stirred 30 min, and extracted with dichloromethane. The crude product was purified by silica gel chromatography (5% dichloromethane in petroleum ether). The combined fractions from the column were concentrated and recrystallized in ethanol to give pale yellow solid (0.5 g).

Step 3: 5-methoxy-3-phenylbenzo[*b*]thiophene (1.00 eq.) was suspended in glacial AcOH (concentration ≈ 0.9 M) and H<sub>2</sub>O<sub>2</sub> (30% aq. solution, 6.5 eq.) was

slowly added. The mixture was heated to 90 °C and, at this temperature, it became a clear solution. Stirring at 90 °C was continued for 3 h and GC-MS analysis showed full conversion. The mixture was allowed to cool to r.t. and partitioned between CH<sub>2</sub>Cl<sub>2</sub> and saturated NaHCO<sub>3</sub> (aq. so to bring the pH of the aq. phase to ≈ 9), the layers were separated and the aq. phase was extracted three times with CH<sub>2</sub>Cl<sub>2</sub>. The combined organic extracts were dried over MgSO<sub>4</sub> and concentrated in vacuo to give the crude product that was purified by flash chromatography (silica gel, petroleum ether–EtOAc).

#### 6-methoxy-3-phenylbenzo[*b*]thiophene 1,1-dioxide **1q**

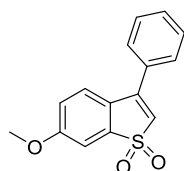

White crystalline solid; <sup>1</sup>H NMR (400 MHz, CDCl<sub>3</sub>) δ (ppm) 7.52 (s, 5H), 7.39 (d, *J* = 8.0 Hz, 1H), 7.34 (d, *J* = 1.2 Hz, 1H), 7.04-7.01 (m, 1H), 6.54 (s, 1H), 3.91 (s, 3H); <sup>13</sup>C NMR (100 MHz, CDCl<sub>3</sub>) δ (ppm) 161.93, 146.24, 140.00, 131.32, 130.40, 129.10, 127.89, 125.42, 123.93, 123.82, 118.48, 107.51, 56.05. HRMS calculated for C<sub>15</sub>H<sub>12</sub>NaO<sub>3</sub>S<sup>+</sup> [(M+Na)<sup>+</sup>] = 295.0402, found: 295.0399.

**The substrates of 2-alkyl-substituted benzo[*b*]thiophene 1,1-dioxides **1i-l** according were synthesized to the method C:**

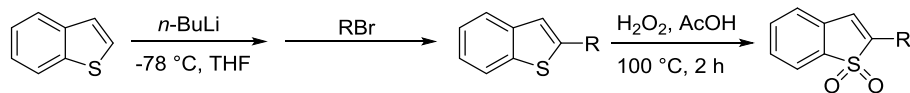

Step 1:<sup>[6]</sup> To a cold (-78 °C) solution of benzo[*b*]thiophene (2.00 mL, 17.1 mmol, 1.00 eq.) in THF (40 mL) was added *n*-BuLi (1.6 M in hexane, 21.4 mL, 34.3 mmol, 2.00 eq.) dropwise via dropping funnel (over 30 min) under Ar. The dropping funnel was rinsed twice with 5 mL Et<sub>2</sub>O. Stirring was continued at -78 °C for 45 min and then the mixture was allowed to slowly warm to r.t. and stirred at this temperature for another 45 min (at r.t. the reaction mixture turned from colorless to yellow). After

this time the reaction mixture was cooled again to  $-78\text{ }^{\circ}\text{C}$  and bromoalkanes (51.4 mmol, 3.00 eq.) was slowly added *via* dropping funnel. The mixture was stirred for 30 min at  $-78\text{ }^{\circ}\text{C}$  (formation of a lump of white solid was observed) and then the temperature was slowly raised to  $0\text{ }^{\circ}\text{C}$  (vigorous gas evolution and formation of a white suspension). After 20 min of stirring at r.t., an aqueous solution of NaOH (66 mmol in 15 mL of  $\text{H}_2\text{O}$ ) was added, the layers were separated and the organic phase was washed with water (10 mL). The combined organic extracts were dried over  $\text{Na}_2\text{SO}_4$  and concentrated *in vacuo* to give a colorless oil that was purified by flash chromatography (silica gel, petroleum ether) to give 2-alkyl benzo[*b*]thiophene as white crystalline solid.

Step 2: 2-alkyl benzo[*b*]thiophene (1.00 eq.) was suspended in glacial AcOH (concentration  $\approx 0.9\text{ M}$ ) and  $\text{H}_2\text{O}_2$  (30% aq. solution, 6.5 eq.) was slowly added. The mixture was heated to  $100\text{ }^{\circ}\text{C}$  and, at this temperature, it became a clear solution. Stirring at  $100\text{ }^{\circ}\text{C}$  was continued for 3 h and after this time GC-MS analysis showed full conversion. The mixture was allowed to cool to r.t. and partitioned between  $\text{CH}_2\text{Cl}_2$  and  $\text{NaHCO}_3$  (aq. sat. so to bring the pH of the aq. phase to  $\approx 9$ ), the layers were separated and the aq. phase was extracted three times with  $\text{CH}_2\text{Cl}_2$ . The combined organic extracts were dried over  $\text{MgSO}_4$  and concentrated *in vacuo* to give the crude product that was purified by flash chromatography (silica gel, petroleum ether–ethyl acetate).

#### 2-benzylbenzo[*b*]thiophene 1,1-dioxide **1i**

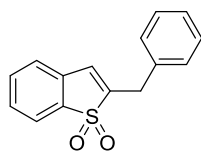

White crystalline solid;  $^1\text{H}$  NMR (400 MHz,  $\text{CDCl}_3$ )  $\delta$  7.72 (d,  $J = 8.0\text{ Hz}$ , 1H), 7.49-7.31 (m, 7H), 7.19 (d,  $J = 8.0\text{ Hz}$ , 1H), 6.41-6.40 (m, 1H), 3.85 (s, 2H);  $^{13}\text{C}$  NMR (100 MHz,  $\text{CDCl}_3$ )  $\delta$  145.21, 136.84, 134.99, 133.63, 131.42, 129.45, 129.41, 128.95, 127.37, 126.31, 124.52, 121.55, 29.61. The characterization data of compound **1i** is in accordance with the reported data in the literature.<sup>[2]</sup>

### 2-ethylbenzo[*b*]thiophene 1,1-dioxide **1j**

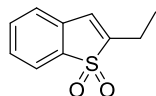

White crystalline solid;  $^1\text{H}$  NMR (400 MHz,  $\text{CDCl}_3$ )  $\delta$  7.70 (d,  $J = 7.6$  Hz, 1H), 7.54-7.50 (m, 1H), 7.45-7.41 (m, 1H), 7.29 (d,  $J = 7.6$  Hz, 1H), 6.76-6.75 (m, 1H), 2.65-2.59 (m, 2H), 1.35 (t,  $J = 7.6$  Hz, 3H);  $^{13}\text{C}$  NMR (100 MHz,  $\text{CDCl}_3$ )  $\delta$  146.71, 136.77, 133.57, 131.61, 129.30, 124.31, 124.27, 121.43, 17.14, 11.14. The characterization data of compound **1j** is in accordance with the reported data in the literature.<sup>[2]</sup>

### 2-propylbenzo[*b*]thiophene 1,1-dioxide **1k**

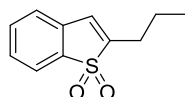

White crystalline solid;  $^1\text{H}$  NMR (400 MHz,  $\text{CDCl}_3$ )  $\delta$  7.69 (d,  $J = 7.6$  Hz, 1H), 7.53-7.49 (m, 1H), 7.43 (t,  $J = 7.6$  Hz, 1H), 7.28 (d,  $J = 7.6$  Hz, 1H), 6.76-6.75 (m, 1H), 2.58-2.53 (m, 2H), 1.81-1.74 (m, 2H), 1.05 (t,  $J = 7.6$  Hz, 3H);  $^{13}\text{C}$  NMR (100 MHz,  $\text{CDCl}_3$ )  $\delta$  145.00, 136.57, 133.51, 131.55, 129.25, 125.07, 124.28, 121.27, 25.82, 20.21, 13.61. The characterization data of compound **1k** is in accordance with the reported data in the literature.<sup>[2]</sup>

### 2-butylbenzo[*b*]thiophene 1,1-dioxide **1l**

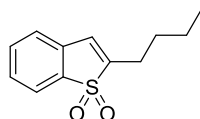

White crystalline solid;  $^1\text{H}$  NMR (400 MHz,  $\text{CDCl}_3$ )  $\delta$  7.68 (d,  $J = 7.2$  Hz, 1H), 7.50 (td,  $J = 7.6$  Hz, 1.2 Hz, 1H), 7.42 (m,  $J = 7.6$  Hz, 0.8 Hz, 1H), 7.27 (d,  $J = 5.2$  Hz, 1H), 6.75 (d,  $J = 0.8$  Hz, 1H), 2.59-2.55 (m, 2H), 1.76-1.68 (m, 2H), 1.50-1.41 (m, 2H), 0.96 (t,  $J = 7.6$  Hz, 3H);  $^{13}\text{C}$  NMR (100 MHz,  $\text{CDCl}_3$ )  $\delta$  145.38, 136.65, 133.54, 131.63, 129.27, 124.89, 124.26, 121.38, 28.83, 23.56, 22.25, 13.67. HRMS calculated for  $\text{C}_{12}\text{H}_{14}\text{NaO}_2\text{S}^+$  [(M+Na) $^+$ ] = 245.0608, found: 245.0606.

**The synthesis of substrates 3-alkyl-substituted benzothiophene 1,1-dioxides 1v-x according to the method D:**

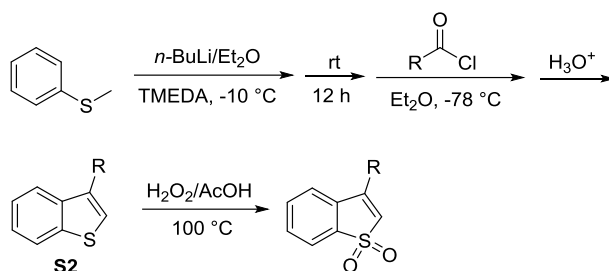

Step 1:<sup>[7]</sup> To a vigorously stirred solution of methyl(phenyl)sulfane (2.48 g, 20.0 mmol), anhydrous TMEDA (2.28 g, 22.0 mmol), and anhydrous Et<sub>2</sub>O (50 mL) cooled to -10 °C, 2.4 M solution of *n*-BuLi in hexane (60 mL) is gradually added under N<sub>2</sub>, and stirring is continued at the room temperature for 12 h. The mixture is then cooled to -78 °C and a solution of the acyl chloride (19.0 mmol) in anhydrous Et<sub>2</sub>O (10 mL) is gradually (30 min) added under N<sub>2</sub>. The resultant mixture is stirred at -78 °C for 1 h, then allowed to warm to room temperature, stirred for 16 h, and poured into H<sub>2</sub>O (50 mL). The pH is adjusted to 4-5 by addition of 10% aqueous HCl. The organic layer is separated, and the aqueous layer extracted with Et<sub>2</sub>O (2×50 mL). The organic phases are combined, dried by Na<sub>2</sub>SO<sub>4</sub>, and concentrated. The crude product was purified by silica gel chromatography to obtain **S2**.

Step 2: **S2** (1.00 eq.) was suspended in glacial AcOH (concentration ≈ 0.9 M) and H<sub>2</sub>O<sub>2</sub> (30% aq. solution, 6.5 eq.) was slowly added. The mixture was heated to 100 °C and, at this temperature, it became a clear solution. Stirring at 100 °C was continued for 3 h and after this time GC-MS analysis showed full conversion. The mixture was allowed to cool to r.t. and partitioned between CH<sub>2</sub>Cl<sub>2</sub> and NaHCO<sub>3</sub> (aq. sat. so to bring the pH of the aq. phase to ≈ 9), the layers were separated and the aq. phase was extracted three times with CH<sub>2</sub>Cl<sub>2</sub>. The combined organic extracts were dried over MgSO<sub>4</sub> and concentrated in vacuo to give the crude product that was purified by flash chromatography (silica gel, petroleum ether–EtOAc).

3-methylbenzo[*b*]thiophene 1,1-dioxide **1v**

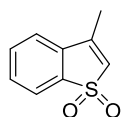

White crystalline solid;  $^1\text{H}$  NMR (400 MHz,  $\text{CDCl}_3$ )  $\delta$  7.73–7.71 (m, 1H), 7.62–7.58 (m, 1H), 7.56–7.52 (m, 1H), 7.41 (d,  $J = 7.6$  Hz, 1H), 6.48–6.47 (m, 1H), 2.28 (d,  $J = 1.2$  Hz, 3H);  $^{13}\text{C}$  NMR (100 MHz,  $\text{CDCl}_3$ )  $\delta$  142.83, 137.48, 133.45, 133.07, 130.41, 125.71, 122.23, 120.90, 13.84. The characterization data of compound **1v** is in accordance with the reported data in the literature.<sup>[2]</sup>

### 3-ethylbenzo[*b*]thiophene 1,1-dioxide **1w**

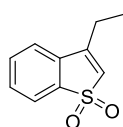

White crystalline solid;  $^1\text{H}$  NMR (400 MHz,  $\text{CDCl}_3$ )  $\delta$  (ppm) 7.72–7.70 (m, 1H), 7.60–7.52 (m, 2H), 7.43–7.41 (m, 1H), 6.45–6.44 (m, 1H), 2.67–2.61 (m, 2H), 1.31 (t,  $J = 7.2$  Hz, 3H);  $^{13}\text{C}$  NMR (100 MHz,  $\text{CDCl}_3$ )  $\delta$  (ppm) 148.72, 137.77, 133.39, 132.71, 130.43, 124.04, 122.07, 121.00, 21.15, 10.95. HRMS calculated for  $\text{C}_{10}\text{H}_{10}\text{NaO}_2\text{S}^+$   $[(\text{M}+\text{Na})^+] = 217.0294$ , found: 217.0293.

### 3-propylbenzo[*b*]thiophene 1,1-dioxide **1x**

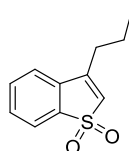

White crystalline solid;  $^1\text{H}$  NMR (400 MHz,  $\text{CDCl}_3$ )  $\delta$  (ppm) 7.72–7.70 (m, 1H), 7.60–7.51 (m, 2H), 7.43–7.41 (m, 1H), 6.44–6.43 (m, 1H), 2.60–2.56 (m, 2H), 1.75–1.70 (m, 2H), 1.07 (t,  $J = 7.2$  Hz, 3H);  $^{13}\text{C}$  NMR (100 MHz,  $\text{CDCl}_3$ )  $\delta$  (ppm) 147.04, 137.72, 133.36, 132.76, 130.40, 124.61, 122.19, 121.03, 29.79, 20.12, 13.82. HRMS calculated for  $\text{C}_{11}\text{H}_{12}\text{NaO}_2\text{S}^+$   $[(\text{M}+\text{Na})^+] = 231.0458$ , found: 231.0450.

**The synthesis of substrate 3-fluoro-2-phenylbenzo[*b*]thiophene 1,1-dioxide **3a** according to the method E:**

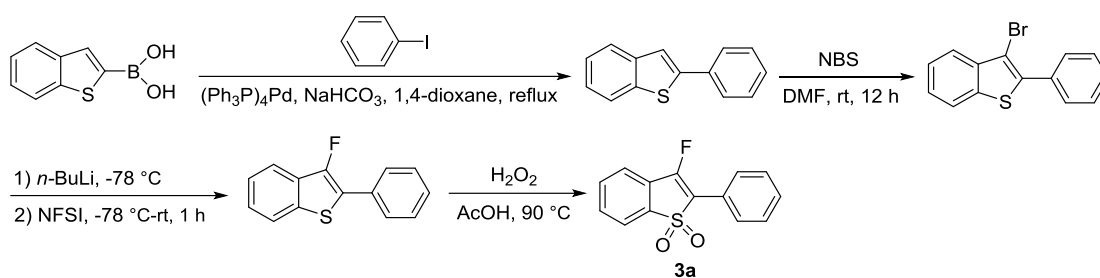

Step 1: The 2-phenylbenzo[*b*]thiophene was synthesized through the procedure according to the method A.

Step 2:<sup>[8]</sup> 2-phenylbenzo[*b*]thiophene (1.00 g, 4.76 mmol, 1.00 eq.), *N*-bromosuccinimide (933 mg, 5.24 mmol, 1.10 eq.), and DMF (10 mL) were combined in a 50 mL round-bottom flask and allowed to stir at room temperature for 12 h. Purification of the crude reaction mixture by filtration through a silica gel plug, eluting with ether, followed by recrystallization of the resulting solid from MeOH, provided 3-bromo-2-phenylbenzo[*b*]thiophene as a pale yellow solid.

Step 3:<sup>[8]</sup> 3-bromo-2-phenylbenzo[*b*]thiophene (578 mg, 2 mmol, 1.0 eq.), *n*-BuLi (2.5 M in hexanes, 0.9 mL, 2.2 mmol, 1.10 eq.), NFSI (758 mg, 2.4 mmol, 1.20 eq.), and THF (15 mL) were combined and allowed to stir at room temperature for 1 h. The 3-fluoro-2-phenylbenzo[*b*]thiophene was purified by flash chromatography (340 mg, 74% yield) as a white solid. <sup>1</sup>H NMR (400 MHz, CDCl<sub>3</sub>) δ (ppm) 7.78-7.74 (m, 4H), 7.47-7.34 (m, 5H). The characterization data of compound is in accordance with the reported data in the literature.<sup>[8]</sup>

Step 4: The substrate **3a** was synthesized through oxidation reaction in the method A: White crystalline solid; <sup>1</sup>H NMR (400 MHz, CDCl<sub>3</sub>) δ (ppm) 7.91-7.89 (m, 2H), 7.83-7.81 (m, 1H), 7.69-7.66 (m, 1H), 7.63-7.59 (m, 2H), 7.53-7.43 (m, 3H); <sup>13</sup>C NMR (100 MHz, CDCl<sub>3</sub>) δ (ppm) 155.96 (*J* = 290.0 Hz), 137.50 (*J* = 3.0 Hz), 133.72, 131.15, 129.96 (*J* = 2.0 Hz), 129.20, 127.54 (*J* = 5.0 Hz), 126.86 (*J* = 28.0 Hz), 124.47 (*J* = 4.0 Hz), 121.18 (*J* = 3.0 Hz), 120.81 (*J* = 6.0 Hz), 120.53. HRMS calculated for C<sub>14</sub>H<sub>9</sub>FN<sub>2</sub>O<sub>2</sub>S<sup>+</sup> [(M+Na)<sup>+</sup>] = 283.0197, found:281.0199.

**The synthesis of substrate 3-methyl-2-phenylbenzo[*b*]thiophene 1,1-dioxide 3b:**

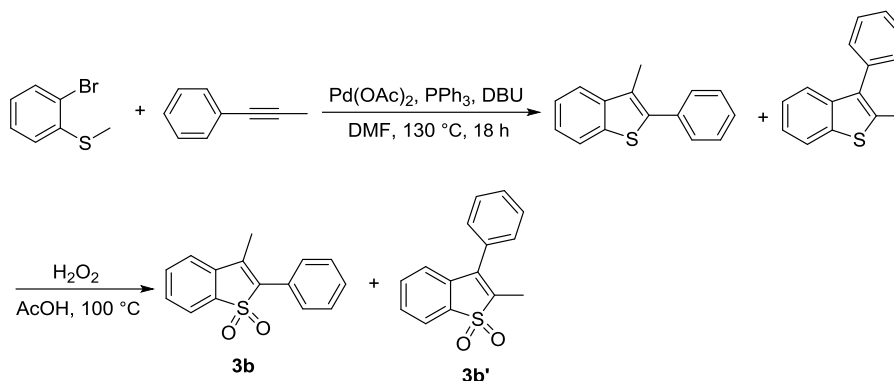

Step 1:<sup>[9]</sup> An oven-dried 50 mL screw-capped vial was charged with (2-bromophenyl)(methyl)sulfane (1.217 g, 6.0 mmol), prop-1-yn-1-ylbenzene (1.043 g, 9.0 mmol), Pd(OAc)<sub>2</sub> (133.89 mg, 0.6 mmol), PPh<sub>3</sub> (480 mg, 1.8 mmol), DBU (2.736 g, 18 mmol), and DMF (18 mL) under a gentle stream of nitrogen. The vessel was then sealed and heated at 130 °C for 18 h. The mixture was cooled to rt and filtered through a short pad of silica gel, eluting with EtOAc.

Step 2: The substrate **3b** was synthesized through oxidation reaction according to the method A: The mixtures of compounds **3b** and **3b'** were recrystallized several times in ethanol to get pure compound **3b**. White crystalline solid; <sup>1</sup>H NMR (400 MHz, CDCl<sub>3</sub>) δ (ppm) 7.78 (d, *J* = 7.4 Hz, 1H), 7.66-7.60 (m, 3H), 7.55-7.46 (m, 5H), 2.28 (s, 3H); <sup>13</sup>C NMR (100 MHz, CDCl<sub>3</sub>) δ (ppm) 137.42, 136.01, 135.38, 133.56, 133.37, 129.91, 129.75, 129.36, 128.97, 127.03, 122.26, 121.04, 12.01. HRMS calculated for C<sub>15</sub>H<sub>13</sub>O<sub>2</sub>S<sup>+</sup> [(M+H)<sup>+</sup>] = 257.0635, found: 257.0630.

### The synthesis of substrate 2,3-dimethylbenzo[*b*]thiophene 1,1-dioxide **3c**:

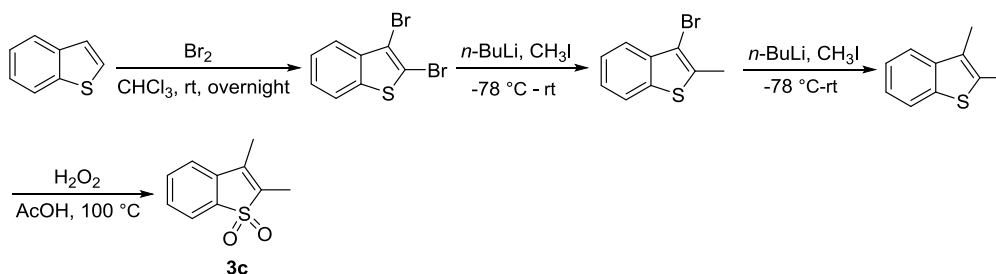

Step 1:<sup>[10]</sup> To a stirred solution of 2,3-benzo[*b*]thiophene (1.01 g, 7.5 mmol, 1.0 eq.) in 20 mL CHCl<sub>3</sub>, bromine (0.8 mL, 15 mmol, 2.0 eq.) in 20 mL CHCl<sub>3</sub> was added dropwise at room temperature over 1 h. After stirring for 18 h in the dark, solid



NaHCO<sub>3</sub> was added to neutralize the hydrobromic acid until gas evolution ceased. The organic phase was washed with water and 10% aqueous Na<sub>2</sub>S<sub>2</sub>O<sub>3</sub> solution, extracted with CHCl<sub>3</sub>, and dried over MgSO<sub>4</sub>. After evaporation of the solvent, crystallization from methanol gave 2,3-dibromobenzo[*b*]thiophene (2.03 g, 91% yield) as a white solid.

Step 2:<sup>[10]</sup> 2,3-dibromobenzo[*b*]thiophene (2.03 g, 7.0 mmol, 1.0 eq.) was dissolved in 10 mL dry degassed THF under argon. The solution was cooled to -78°C before *n*-BuLi (4.8 mL, 7.7 mmol, 1.6 M in hexane, 1.1 eq.) was added, and the mixture was stirred for 30 min before iodomethane (0.5 mL, 7.9 mmol, 1.1 eq.) was added. The mixture was allowed to warm to room temperature, washed with water, extracted with ethyl acetate and dried over MgSO<sub>4</sub>. A short column chromatography (silica, petroleum ether 100%) gave the product as white solid.

Step 3:<sup>[11]</sup> 3-Bromo-2-methylbenzothiophene (1.0 g, 4.4 mmol) was dissolved in THF (25 mL). 3 mL *n*-BuLi (1.6 M in hexane, 4.8 mmol) was added slowly with stirring at -78 °C. Reaction mixture was stirred for 30 min and then methyl iodide (4.8 mmol) was added. After stirring for 1h, the mixture was warmed to room temperature and stirred for 2 h at room temperature. After completion of reaction, H<sub>2</sub>O was added. The mixture was extracted with CH<sub>2</sub>Cl<sub>2</sub> (2 x 25 mL), dried over MgSO<sub>4</sub>, filtered and the solvents were removed. The residue was purified by chromatography on silica gel to give 2,3-dimethylbenzo[*b*]thiophene (642 mg, 90 % yield).

Step 4: The substrate **3c** according was synthesized through oxidation reaction according to the method A: White crystalline solid; <sup>1</sup>H NMR (400 MHz, CDCl<sub>3</sub>) δ (ppm) 7.72 (d, *J* = 7.4 Hz, 1H), 7.58-7.54 (m, 1H), 7.48-7.44 (m, 1H), 7.36 (d, *J* = 7.6 Hz, 1H), 2.14 (s, 6H); <sup>13</sup>C NMR (100 MHz, CDCl<sub>3</sub>) δ (ppm) 135.90, 134.09, 133.91, 133.47, 129.12, 121.50, 120.90, 10.92, 6.83. HRMS calculated for C<sub>10</sub>H<sub>11</sub>O<sub>2</sub>S<sup>+</sup> [(M+H)<sup>+</sup>] = 195.0476, found: 195.0474.

### 3. General procedure for asymmetric hydrogenation

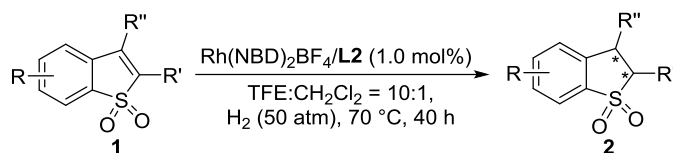

A stock solution was made by mixing  $\text{Rh}(\text{NBD})_2\text{BF}_4$  with *N*-methylated ZhaoPhos **L2** in a 1:1.1 molar ratio in  $\text{CH}_2\text{Cl}_2$  at room temperature for 40 min in an argon-filled glovebox. An aliquot of the catalyst solution (0.1 mL, 0.001 mmol) was transferred by syringe into the vials charged with different substrates (0.1 mmol for each) in anhydrous  $\text{CF}_3\text{CH}_2\text{OH}$  (1.0 mL). The vials were subsequently transferred into an autoclave into which hydrogen gas was then charged. The reaction was then stirred under  $\text{H}_2$  (50 atm) at  $70^\circ\text{C}$  for 40 h. After completed, the hydrogen gas was released slowly and carefully. The solution was concentrated and passed through a short column of silica gel (eluant: EA) to remove the metal complex. The ee values of all compounds were determined by HPLC analysis on a chiral stationary phase.

The absolute configurations of products **2a**, **2n** and **2v** were determined by comparison of analytical data with the literatures (optical rotation data).<sup>[2]</sup> The absolute configuration of others was assigned by analogy.

*(R)*-2-phenyl-2,3-dihydrobenzo[*b*]thiophene 1,1-dioxide **2a**

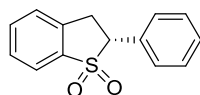

Colorless crystalline solid; >99% conv., 98% yield, 24.0 mg, >99% ee;  $[\alpha]_{\text{D}}^{20} = -75.0$  ( $c = 0.5$ ,  $\text{CHCl}_3$ ); The enantiomeric excess was determined by HPLC on Chiralpak AS-H column, hexane: isopropanol = 80:20; flow rate = 1.0 mL/min; UV detection at 220 nm;  $t_{\text{R}} = 54.6$  min (major), 74.7 min (minor).  $^1\text{H}$  NMR (400 MHz,  $\text{CDCl}_3$ )  $\delta$  (ppm) 7.80 (d,  $J = 8.0$  Hz, 1H), 7.64-7.60 (m, 1H), 7.53-7.50 (m, 1H), 7.49-7.42 (m, 6H), 4.68 (t,  $J = 8.4$  Hz, 1H), 3.65 (d,  $J = 8.4$  Hz, 2H);  $^{13}\text{C}$  NMR (100 MHz,  $\text{CDCl}_3$ )  $\delta$  (ppm) 138.30, 136.30, 133.42, 129.99, 129.39, 129.31, 129.05, 128.97, 127.01, 122.32, 67.33, 32.78. The characterization data of compound **2a** is in accordance with the reported data in the literature.<sup>[2]</sup>

(*R*)-2-(4-methoxyphenyl)-2,3-dihydrobenzo[*b*]thiophene 1,1-dioxide **2b**

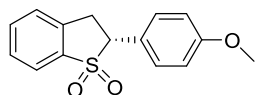

Colorless crystalline solid; >99% conv., 98% yield, 26.8 mg, 97% ee;  $[\alpha]_{\text{D}}^{20} = -57.8$  ( $c = 0.6$ ,  $\text{CHCl}_3$ ); The enantiomeric excess was determined by HPLC on Chiralpak AD-H column, hexane: isopropanol = 80:20; flow rate = 1.0 mL/min; UV detection at 220 nm;  $t_{\text{R}} = 36.6$  min (minor), 54.5 min (major).  $^1\text{H}$  NMR (400 MHz,  $\text{CDCl}_3$ )  $\delta$  (ppm) 7.79 (d,  $J = 7.7$  Hz, 1H), 7.63-7.59 (m, 1H), 7.50 (t,  $J = 7.4$  Hz, 1H), 7.44 (d,  $J = 7.6$  Hz, 1H), 7.41-7.38 (m, 2H), 6.98-6.94 (m, 2H), 4.63 (t,  $J = 8.5$  Hz, 1H), 3.83 (s, 3H), 3.61-3.59 (m, 2H);  $^{13}\text{C}$  NMR (100 MHz,  $\text{CDCl}_3$ )  $\delta$  (ppm) 160.39, 138.25, 136.36, 133.34, 130.50, 128.99, 126.97, 122.33, 121.57, 114.40, 66.82, 55.30, 32.82. The characterization data of compound **2b** is in accordance with the reported data in the literature.<sup>[2]</sup>

(*R*)-2-(4-fluorophenyl)-2,3-dihydrobenzo[*b*]thiophene 1,1-dioxide **2c**

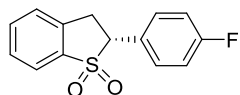

Colorless crystalline solid; >99% conv., 99% yield, 25.9 mg, 97% ee;  $[\alpha]_{\text{D}}^{20} = -57.9$  ( $c = 0.62$ ,  $\text{CHCl}_3$ ); The enantiomeric excess was determined by HPLC on Chiralpak AD-H column, hexane: isopropanol = 90:10; flow rate = 1.0 mL/min; UV detection at 220 nm;  $t_{\text{R}} = 47.9$  min (minor), 55.2 min (major).  $^1\text{H}$  NMR (400 MHz,  $\text{CDCl}_3$ )  $\delta$  (ppm) 7.80 (d,  $J = 7.7$  Hz, 1H), 7.65-7.61 (m, 1H), 7.52 (t,  $J = 7.6$  Hz, 1H), 7.48-7.44 (m, 3H), 7.16-7.11 (m, 2H), 4.68-4.64 (m, 1H), 3.69-3.55 (m, 2H);  $^{13}\text{C}$  NMR (100 MHz,  $\text{CDCl}_3$ )  $\delta$  (ppm) 163.35 (d,  $J = 248.0$  Hz), 138.10, 136.06, 133.51, 131.12 (d,  $J = 8.0$  Hz), 129.16, 127.01, 125.76 (d,  $J = 3.0$  Hz), 122.36, 116.07 (d,  $J = 21.0$  Hz), 66.54, 32.97. The characterization data of compound **2c** is in accordance with the reported data in the literature.<sup>[2]</sup>

(*R*)-2-(*o*-tolyl)-2,3-dihydrobenzo[*b*]thiophene 1,1-dioxide **2d**

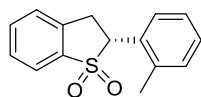

Colorless crystalline solid; >99% conv., 98% yield, 25.3 mg, 97% ee;  $[\alpha]_{\text{D}}^{20} = -191.8$  ( $c = 0.44$ ,  $\text{CHCl}_3$ ); The enantiomeric excess was determined by HPLC on Chiralpak AD-H column, hexane: isopropanol = 90:10; flow rate = 1.0 mL/min; UV detection at 220 nm;  $t_{\text{R}} = 30.0$  min (minor), 35.0 min (major).  $^1\text{H}$  NMR (400 MHz,  $\text{CDCl}_3$ )  $\delta$  (ppm) 7.78 (d,  $J = 7.7$  Hz, 1H), 7.64-7.60 (m, 1H), 7.52 (t,  $J = 7.6$  Hz, 1H), 7.46 (d,  $J = 7.7$  Hz, 1H), 7.35 (d,  $J = 7.3$  Hz, 1H), 7.30-7.22 (m, 3H), 5.06 (t,  $J = 7.9$  Hz, 1H), 3.65 (d,  $J = 7.5$  Hz, 2H), 2.55 (s, 3H);  $^{13}\text{C}$  NMR (100 MHz,  $\text{CDCl}_3$ )  $\delta$  (ppm) 138.54, 138.32, 136.69, 133.40, 130.92, 129.04, 129.00, 128.85, 127.84, 126.91, 126.47, 122.29, 62.93, 33.10, 20.24. The characterization data of compound **2d** is in accordance with the reported data in the literature.<sup>[2]</sup>

*(R)*-2-(*m*-tolyl)-2,3-dihydrobenzo[*b*]thiophene 1,1-dioxide **2e**

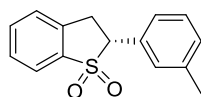

Colorless crystalline solid; >99% conv., 98% yield, 25.3 mg, 97% ee;  $[\alpha]_{\text{D}}^{20} = -71.7$  ( $c = 0.67$ ,  $\text{CHCl}_3$ ); The enantiomeric excess was determined by HPLC on Chiralpak AD-H column, hexane: isopropanol = 90:10; flow rate = 1.0 mL/min; UV detection at 220 nm;  $t_{\text{R}} = 40.4$  min (major), 56.9 min (minor).  $^1\text{H}$  NMR (400 MHz,  $\text{CDCl}_3$ )  $\delta$  (ppm) 7.80 (d,  $J = 7.7$  Hz, 1H), 7.63-7.59 (m, 1H), 7.51 (t,  $J = 7.3$  Hz, 1H), 7.44 (d,  $J = 7.6$  Hz, 1H), 7.33 (t,  $J = 7.5$  Hz, 1H), 7.28-7.23 (m, 3H), 4.65 (t,  $J = 8.5$  Hz, 1H), 3.64 (d,  $J = 8.1$  Hz, 2H), 2.39 (s, 3H);  $^{13}\text{C}$  NMR (100 MHz,  $\text{CDCl}_3$ )  $\delta$  (ppm) 138.67, 138.31, 136.33, 133.37, 130.19, 130.04, 129.75, 128.99, 128.82, 126.99, 126.24, 122.28, 67.29, 32.65, 21.41. The characterization data of compound **2e** is in accordance with the reported data in the literature.<sup>[2]</sup>

*(R)*-2-(4-(*tert*-butyl)phenyl)-2,3-dihydrobenzo[*b*]thiophene 1,1-dioxide **2f**

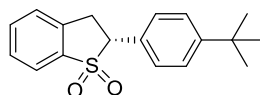

Colorless crystalline solid; >99% conv., 98% yield, 29.4 mg, 96% ee;  $[\alpha]_D^{20} = -26.7$  ( $c = 0.80$ ,  $\text{CHCl}_3$ ); The enantiomeric excess was determined by HPLC on Chiralpak AD-H column, hexane: isopropanol = 90:10; flow rate = 1.0 mL/min; UV detection at 220 nm;  $t_R = 29.1$  min (minor), 31.1 min (major).  $^1\text{H}$  NMR (400 MHz,  $\text{CDCl}_3$ )  $\delta$  (ppm) 7.79 (d,  $J = 7.6$  Hz, 1H), 7.62-7.58 (m, 1H), 7.50 (t,  $J = 7.3$  Hz, 1H), 7.47-7.39 (m, 5H), 4.66 (t,  $J = 8.5$  Hz, 1H), 3.62 (d,  $J = 8.4$  Hz, 2H), 1.33 (m, 9H);  $^{13}\text{C}$  NMR (100 MHz,  $\text{CDCl}_3$ )  $\delta$  (ppm) 152.42, 138.35, 136.42, 133.34, 129.01, 128.98, 127.00, 126.74, 125.96, 122.30, 67.09, 34.66, 32.78, 31.20. HRMS calculated for  $\text{C}_{18}\text{H}_{20}\text{NaO}_2\text{S}^+$   $[(\text{M}+\text{Na})^+] = 323.1078$ , found: 323.1076.

(*R*)-2-(3-chlorophenyl)-2,3-dihydrobenzo[*b*]thiophene 1,1-dioxide **2g**

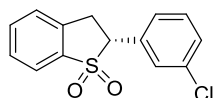

Colorless crystalline solid; >99% conv., 98% yield, 27.2 mg, 98% ee;  $[\alpha]_D^{20} = -58.8$  ( $c = 0.53$ ,  $\text{CHCl}_3$ ); The enantiomeric excess was determined by HPLC on Chiralpak AD-H column, hexane: isopropanol = 90:10; flow rate = 1.0 mL/min; UV detection at 220 nm;  $t_R = 42.3$  min (major), 48.3 min (minor).  $^1\text{H}$  NMR (400 MHz,  $\text{CDCl}_3$ )  $\delta$  (ppm) 7.80 (d,  $J = 7.7$  Hz, 1H), 7.65-7.61 (m, 1H), 7.53 (t,  $J = 7.5$  Hz, 1H), 7.46-7.44 (m, 2H), 7.42-7.36 (m, 3H), 4.64 (t,  $J = 8.0$  Hz, 1H), 3.69-3.56 (m, 2H);  $^{13}\text{C}$  NMR (100 MHz,  $\text{CDCl}_3$ )  $\delta$  (ppm) 138.04, 135.89, 134.83, 133.60, 132.03, 130.17, 129.59, 129.39, 129.21, 127.56, 127.04, 122.32, 66.67, 32.70. HRMS calculated for  $\text{C}_{14}\text{H}_{11}\text{ClNaO}_2\text{S}^+$   $[(\text{M}+\text{Na})^+] = 301.0059$ , found: 301.0060.

(*R*)-2-(naphthalen-2-yl)-2,3-dihydrobenzo[*b*]thiophene 1,1-dioxide **2h**

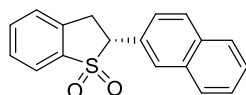

Colorless crystalline solid; >99% conv., 98% yield, 28.8 mg, 95% ee;  $[\alpha]_D^{20} = -79.1$  ( $c = 0.67$ ,  $\text{CHCl}_3$ ); The enantiomeric excess was determined by HPLC on Chiralcel OD-H column, hexane: isopropanol = 85:15; flow rate = 1.0 mL/min; UV detection at 220 nm;  $t_R = 35.4$  min (major), 52.5 min (minor).  $^1\text{H}$  NMR (400 MHz,

CDCl<sub>3</sub>)  $\delta$  (ppm) 7.94-7.81 (m, 5H), 7.64 (t,  $J = 7.1$  Hz, 1H), 7.58-7.47 (m, 5H), 4.85 (t,  $J = 8.4$  Hz, 1H), 3.82-3.69 (m, 2H); <sup>13</sup>C NMR (100 MHz, CDCl<sub>3</sub>)  $\delta$  (ppm) 138.33, 136.29, 133.57, 133.47, 133.13, 129.23, 129.08, 128.78, 128.08, 127.71, 127.41, 127.04, 126.79, 126.54, 126.03, 122.33, 67.45, 32.78. HRMS calculated for C<sub>18</sub>H<sub>14</sub>NaO<sub>2</sub>S<sup>+</sup> [(M+Na)<sup>+</sup>] = 317.0610, found: 317.0606.

(+)-2-benzyl-2,3-dihydrobenzo[*b*]thiophene 1,1-dioxide **2i**

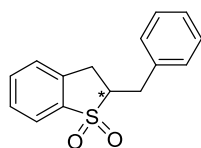

Colorless crystalline solid; >99% conv., 98% yield, 25.3 mg, 83% ee;  $[\alpha]_D^{20} = +27.2$  ( $c = 0.66$ , CHCl<sub>3</sub>); The enantiomeric excess was determined by HPLC on Chiralpak AS-H column, hexane: isopropanol = 80:20; flow rate = 1.0 mL/min; UV detection at 220 nm;  $t_R = 53.8$  min (major), 68.0 min (minor). <sup>1</sup>H NMR (400 MHz, CDCl<sub>3</sub>)  $\delta$  (ppm) 7.77 (d,  $J = 7.7$  Hz, 1H), 7.57-7.53 (m, 1H), 7.47 (t,  $J = 7.4$  Hz, 1H), 7.38-7.35 (m, 2H), 7.31-7.27 (m, 4H), 3.77-3.69 (m, 1H), 3.54 (dd,  $J = 14.0, 4.7$  Hz 1H), 3.22 (dd,  $J = 16.3, 7.5$  Hz 1H), 3.05 (dd,  $J = 16.3, 8.1$  Hz, 1H), 2.90 (dd,  $J = 14.0, 10.7$  Hz, 1H); <sup>13</sup>C NMR (100 MHz, CDCl<sub>3</sub>)  $\delta$  (ppm) 138.85, 136.53, 136.31, 133.41, 128.98, 128.93, 128.79, 127.17, 127.10, 121.93, 62.37, 33.15, 31.83. The characterization data of compound **2i** is in accordance with the reported data in the literature.<sup>[2]</sup>

(+)-2-ethyl-2,3-dihydrobenzo[*b*]thiophene 1,1-dioxide **2j**

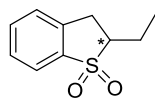

White solid; >99% conv., 99% yield, 19.4 mg, 88% ee;  $[\alpha]_D^{20} = +20.0$  ( $c = 0.58$ , CHCl<sub>3</sub>); The enantiomeric excess was determined by HPLC on Chiralpak AS-H column, hexane: isopropanol = 80:20; flow rate = 1.0 mL/min; UV detection at 220 nm;  $t_R = 28.9$  min (major), 65.0 min (minor). <sup>1</sup>H NMR (400 MHz, CDCl<sub>3</sub>)  $\delta$  (ppm) 7.74 (d,  $J = 7.7$  Hz, 1H), 7.55 (td,  $J = 7.5, 1.0$  Hz, 1H), 7.45 (t,  $J = 7.5$  Hz, 1H), 7.34

(d,  $J = 7.7$  Hz, 1H), 3.45-3.35 (m, 2H), 3.00-2.93 (m, 1H), 2.23-2.12 (m, 1H), 1.85-1.74 (m, 1H), 1.19 (t,  $J = 7.5$  Hz, 3H);  $^{13}\text{C}$  NMR (100 MHz,  $\text{CDCl}_3$ )  $\delta$  (ppm) 139.17, 136.41, 133.26, 128.69, 126.98, 121.79, 62.94, 32.19, 21.08, 11.60. The characterization data of compound **2j** is in accordance with the reported data in the literature.<sup>[2]</sup>

(+)-2-propyl-2,3-dihydrobenzo[*b*]thiophene 1,1-dioxide **2k**

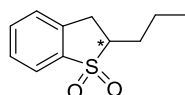

White solid; >99% conv., 98% yield, 20.6 mg, 92% ee;  $[\alpha]_{\text{D}}^{20} = +19.2$  ( $c = 0.5$ ,  $\text{CHCl}_3$ ); The enantiomeric excess was determined by HPLC on Chiralpak AS-H column, hexane: isopropanol = 80:20; flow rate = 1.0 mL/min; UV detection at 220 nm;  $t_{\text{R}} = 27.2$  min (major), 50.6 min (minor).  $^1\text{H}$  NMR (400 MHz,  $\text{CDCl}_3$ )  $\delta$  7.76 (d,  $J = 7.6$  Hz, 1H), 7.58-7.54 (m, 1H), 7.46 (t,  $J = 7.5$  Hz, 1H), 7.34 (d,  $J = 7.7$  Hz, 1H), 3.51-3.38 (m, 2H), 3.02-2.96 (m, 1H), 2.17-2.08 (m, 1H), 1.78-1.71 (m, 1H), 1.64-1.60 (m, 2H), 1.04 (t,  $J = 7.3$  Hz, 3H);  $^{13}\text{C}$  NMR (100 MHz,  $\text{CDCl}_3$ )  $\delta$  (ppm) 139.10, 136.46, 133.22, 128.64, 126.97, 121.74, 61.24, 32.37, 29.48, 20.27, 13.88. The characterization data of compound **2k** is in accordance with the reported data in the literature.<sup>[2]</sup>

(+)-2-butyl-2,3-dihydrobenzo[*b*]thiophene 1,1-dioxide **2l**

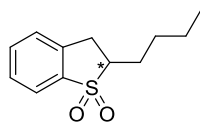

White solid; >99% conv., 98% yield, 22.0 mg, 91% ee;  $[\alpha]_{\text{D}}^{20} = +20.8$  ( $c = 0.72$ ,  $\text{CHCl}_3$ ); The enantiomeric excess was determined by HPLC on Chiralpak AS-H column, hexane: isopropanol = 80:20; flow rate = 1.0 mL/min; UV detection at 220 nm;  $t_{\text{R}} = 30.2$  min (major), 47.7 min (minor).  $^1\text{H}$  NMR (400 MHz,  $\text{CDCl}_3$ )  $\delta$  (ppm) 7.74 (d,  $J = 7.7$  Hz, 1H), 7.57-7.52 (m, 1H), 7.45 (t,  $J = 7.5$  Hz, 1H), 7.33 (d,  $J = 7.7$  Hz, 1H), 3.46-3.38 (m, 2H), 3.02-2.94 (m, 1H), 2.16-2.10 (m, 1H), 1.76-1.71 (m, 1H), 1.61-1.51 (m, 2H), 1.45-1.39 (m, 2H), 0.95 (t,  $J = 7.3$  Hz, 3H);  $^{13}\text{C}$  NMR (100 MHz,

CDCl<sub>3</sub>)  $\delta$  (ppm) 139.14, 136.47, 133.23, 128.66, 126.97, 121.79, 61.57, 32.44, 29.07, 27.20, 22.54, 13.78. HRMS calculated for C<sub>12</sub>H<sub>16</sub>NaO<sub>2</sub>S<sup>+</sup> [(M+Na)<sup>+</sup>] = 247.0766, found: 247.0763.

(*R*)-3-phenyl-2,3-dihydrobenzo[*b*]thiophene 1,1-dioxide **2m**

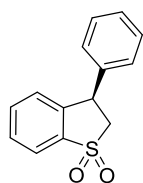

Colorless crystalline solid; >99% conv., 99% yield, 24.2 mg, >99% ee; [ $\alpha$ ]<sub>D</sub><sup>20</sup> = +9.4 (c = 0.5, CHCl<sub>3</sub>); The enantiomeric excess was determined by HPLC on Chiralpak AS-H column, hexane: isopropanol = 80:20; flow rate = 1.0 mL/min; UV detection at 220 nm; t<sub>R</sub> = 58.9 min (major), t<sub>R</sub> = 39.6 min (minor). <sup>1</sup>H NMR (400 MHz, CDCl<sub>3</sub>)  $\delta$  (ppm) 7.82-7.80 (m, 1H), 7.57-7.50 (m, 2H), 7.41-7.32 (m, 3H), 7.26-7.24 (m, 2H), 7.10 (d, *J* = 7.4 Hz, 1H), 4.79 (t, *J* = 7.8 Hz, 1H), 3.93 (dd, *J* = 13.5, 8.0 Hz, 1H), 3.51 (dd, *J* = 13.5, 7.8 Hz, 1H); <sup>13</sup>C NMR (100 MHz, CDCl<sub>3</sub>)  $\delta$  (ppm) 141.00, 139.70, 139.02, 133.71, 129.29, 129.11, 128.21, 128.10, 127.21, 121.15, 58.93, 43.96. The characterization data of compound **2m** is in accordance with the reported data in the literature.<sup>[2]</sup>

(*R*)-3-(4-methoxyphenyl)-2,3-dihydrobenzo[*b*]thiophene 1,1-dioxide **2n**

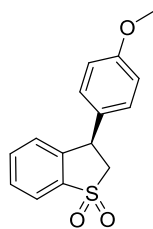

Colorless crystalline solid; >99% conv., 99% yield, 27.2 mg, >99% ee; [ $\alpha$ ]<sub>D</sub><sup>20</sup> = +6.7 (c = 0.7, CHCl<sub>3</sub>); The enantiomeric excess was determined by HPLC on Chiralpak AS-H column, hexane: isopropanol = 80:20; flow rate = 1.0 mL/min; UV detection at 220 nm; t<sub>R</sub> = 82.7 min (major), t<sub>R</sub> = 55.4 min (minor). <sup>1</sup>H NMR (400 MHz, CDCl<sub>3</sub>)  $\delta$  (ppm) 7.81-7.78 (m, 1H), 7.56-7.48 (m, 2H), 7.17-7.14 (m, 2H), 7.11-7.10



(m, 1H), 6.92-6.88 (m, 2H), 4.75 (t,  $J = 7.9$  Hz, 1H), 3.89 (dd,  $J = 13.5, 7.9$  Hz, 1H), 3.82 (s, 3H), 3.46 (dd,  $J = 13.5, 7.9$  Hz, 1H);  $^{13}\text{C}$  NMR (100 MHz,  $\text{CDCl}_3$ )  $\delta$  (ppm) 159.28, 141.39, 138.97, 133.66, 131.59, 129.28, 129.01, 127.14, 121.08, 114.58, 59.06, 55.31, 43.22. The characterization data of compound **2n** is in accordance with the reported data in the literature.<sup>[2]</sup>

(*R*)-3-(*m*-tolyl)-2,3-dihydrobenzo[*b*]thiophene 1,1-dioxide **2o**

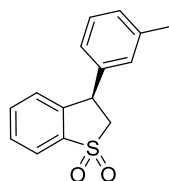

Colorless crystalline solid; >99% conv., 99% yield, 25.6 mg, >99% ee;  $[\alpha]_{\text{D}}^{20} = +6.26$  ( $c = 0.33$   $\text{CHCl}_3$ ); The enantiomeric excess was determined by HPLC on Chiralpak AS-H column, hexane: isopropanol = 80:20; flow rate = 1.0 mL/min; UV detection at 220 nm;  $t_{\text{R}} = 41.4$  min (major),  $t_{\text{R}} = 28.0$  min (minor).  $^1\text{H}$  NMR (400 MHz,  $\text{CDCl}_3$ )  $\delta$  (ppm) 7.81-7.79 (m, 1H), 7.56-7.49 (m, 2H), 7.28-7.25 (m, 1H), 7.15 (d,  $J = 7.5$  Hz, 1H), 7.10 (d,  $J = 7.5$  Hz, 1H), 7.04-7.02 (m, 2H), 4.75 (t,  $J = 7.9$  Hz, 1H), 3.91 (dd,  $J = 13.5, 8.0$  Hz, 1H), 3.50 (dd,  $J = 13.5, 7.9$  Hz, 1H), 2.34 (s, 3H);  $^{13}\text{C}$  NMR (100 MHz,  $\text{CDCl}_3$ )  $\delta$  (ppm) 141.13, 139.61, 139.11, 138.99, 133.69, 129.14, 129.04, 128.84, 127.23, 125.27, 121.10, 58.94, 43.90, 21.38. The characterization data of compound **2o** is in accordance with the reported data in the literature.<sup>[2]</sup>

(*R*)-3-(*p*-tolyl)-2,3-dihydrobenzo[*b*]thiophene 1,1-dioxide **2p**

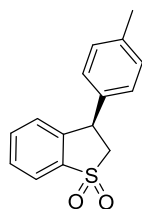

Colorless crystalline solid; >99% conv., 99% yield, 25.6 mg, >99% ee;  $[\alpha]_{\text{D}}^{20} = +8.5$  ( $c = 0.75$ ,  $\text{CHCl}_3$ ); The enantiomeric excess was determined by HPLC on Chiralpak AS-H column, hexane: isopropanol = 80:20; flow rate = 1.0 mL/min; UV

detection at 220 nm;  $t_R = 40.3$  min (major),  $t_R = 33.9$  min (minor).  $^1\text{H}$  NMR (400 MHz,  $\text{CDCl}_3$ )  $\delta$  (ppm) 7.80-7.78 (m, 1H), 7.56-7.48 (m, 2H), 7.19 (d,  $J = 7.9$  Hz, 2H), 7.13-7.09 (m, 3H), 4.75 (t,  $J = 7.9$  Hz, 1H), 3.90 (dd,  $J = 13.5, 7.9$  Hz, 1H), 3.48 (dd,  $J = 13.5, 7.9$  Hz, 1H), 2.36 (s, 3H);  $^{13}\text{C}$  NMR (100 MHz,  $\text{CDCl}_3$ )  $\delta$  (ppm) 141.27, 139.01, 137.93, 136.64, 133.66, 129.93, 129.02, 128.07, 127.17, 121.11, 59.02, 43.60, 21.07. The characterization data of compound **2p** is in accordance with the reported data in the literature.<sup>[2]</sup>

(-)-6-methoxy-3-phenyl-2,3-dihydrobenzo[*b*]thiophene 1,1-dioxide **2q**

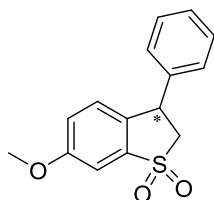

Colorless crystalline solid; >99% conv., 99% yield, 27.1 mg, >99% ee;  $[\alpha]_D^{20} = -10.56$  ( $c = 3.00$ ,  $\text{CH}_3\text{OH}$ ); The enantiomeric excess was determined by HPLC on Chiralpak AS-H column, hexane: isopropanol = 80:20; flow rate = 1.0 mL/min; UV detection at 220 nm;  $t_R = 36.8$  min (minor),  $t_R = 39.5$  min (major).  $^1\text{H}$  NMR (400 MHz,  $\text{CDCl}_3$ )  $\delta$  (ppm) 7.39-7.30 (m, 3H), 7.24-7.22 (m, 3H), 7.08 (dd,  $J = 8.6, 2.5$  Hz, 1H), 6.98 (d,  $J = 8.6$  Hz, 1H), 4.72 (t,  $J = 7.7$  Hz, 1H), 3.93 (dd,  $J = 13.5, 8.0$  Hz, 1H), 3.87 (s, 3H), 3.50 (dd,  $J = 13.5, 7.4$  Hz, 1H);  $^{13}\text{C}$  NMR (100 MHz,  $\text{CDCl}_3$ )  $\delta$  (ppm) 160.31, 140.11, 139.98, 132.74, 129.23, 128.13, 128.07, 128.00, 122.24, 103.37, 59.60, 55.83, 43.22. HRMS calculated for  $\text{C}_{15}\text{H}_{14}\text{NaO}_3\text{S}^+$   $[(\text{M}+\text{Na})^+]$  = 297.0558, found: 297.0555.

(*R*)-3-(4-fluorophenyl)-2,3-dihydrobenzo[*b*]thiophene 1,1-dioxide **2r**

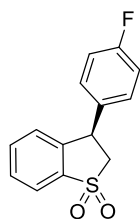

Colorless crystalline solid; >99% conv., 99% yield, 26.0 mg, >99% ee;  $[\alpha]_D^{20} =$

+7.7 (c = 0.7, CHCl<sub>3</sub>); The enantiomeric excess was determined by HPLC on Chiralpak AS-H column, hexane: isopropanol = 80:20; flow rate = 1.0 mL/min; UV detection at 220 nm; t<sub>R</sub> = 43.8 min (minor), t<sub>R</sub> = 63.9 min (major). <sup>1</sup>H NMR (400 MHz, CDCl<sub>3</sub>) δ (ppm) 7.82-7.80 (m, 1H), 7.59-7.51 (m, 2H), 7.24-7.20 (m, 2H), 7.11-7.05 (m, 3H), 4.79 (t, J = 7.7 Hz, 1H), 3.92 (dd, J = 13.5, 8.0 Hz, 1H), 3.46 (dd, J = 13.5, 7.5 Hz, 1H); <sup>13</sup>C NMR (100 MHz, CDCl<sub>3</sub>) δ (ppm) 162.35 (d, J = 246.0 Hz), 140.71, 139.03, 135.60 (d, J = 3.0 Hz), 133.81, 129.84 (d, J = 8.0 Hz), 129.27, 127.11, 121.24, 116.25 (d, J = 21.0 Hz), 58.88, 43.23. The characterization data of compound **2r** is in accordance with the reported data in the literature.<sup>[2]</sup>

(*R*)-3-(3-chlorophenyl)-2,3-dihydrobenzo[*b*]thiophene 1,1-dioxide **2s**

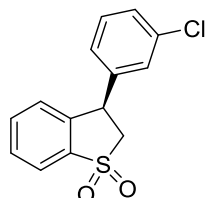

Colorless crystalline solid; >99% conv., 99% yield, 27.5 mg, >99% ee; [α]<sub>D</sub><sup>20</sup> = +2.03 (c = 0.59, CHCl<sub>3</sub>); The enantiomeric excess was determined by HPLC on Chiralpak AS-H column, hexane: isopropanol = 80:20; flow rate = 1.0 mL/min; UV detection at 220 nm; t<sub>R</sub> = 35.5 min (minor), t<sub>R</sub> = 61.5 min (major); <sup>1</sup>H NMR (400 MHz, CDCl<sub>3</sub>) δ (ppm) 7.83-7.80 (m, 1H), 7.60-7.52 (m, 2H), 7.34-7.30 (m, 2H), 7.25 (d, J = 0.8 Hz, 1H), 7.15-7.11 (m, 2H), 4.77 (t, J = 7.8 Hz, 1H), 3.92 (dd, J = 13.5, 8.1 Hz, 1H), 3.48 (dd, J = 13.5, 7.5 Hz, 1H); <sup>13</sup>C NMR (100 MHz, CDCl<sub>3</sub>) δ (ppm) 141.81, 140.08, 139.09, 135.13, 133.90, 130.63, 129.43, 128.40, 128.37, 127.15, 126.39, 121.34, 58.62, 43.59. HRMS calculated for C<sub>14</sub>H<sub>11</sub>ClNaO<sub>2</sub>S<sup>+</sup> [(M+Na)<sup>+</sup>] = 301.0063, found: 301.0060.

(*R*)-3-(4-chlorophenyl)-2,3-dihydrobenzo[*b*]thiophene 1,1-dioxide **2t**

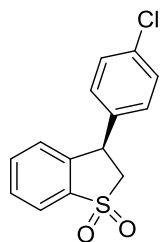

Colorless crystalline solid; >99% conv., 98% yield, 27.2 mg, 94% ee;  $[\alpha]_D^{20} = +1.60$  ( $c = 0.56$ ,  $\text{CHCl}_3$ ); The enantiomeric excess was determined by HPLC on Chiralpak AS-H column, hexane: isopropanol = 80:20; flow rate = 1.0 mL/min; UV detection at 220 nm;  $t_R = 54.8$  min (minor),  $t_R = 59.5$  min (major).  $^1\text{H}$  NMR (400 MHz,  $\text{CDCl}_3$ )  $\delta$  (ppm) 7.81-7.79 (m, 1H), 7.58-7.50 (m, 2H), 7.37-7.33 (m, 2H), 7.20-7.17 (m, 2H), 7.10-7.08 (m, 1H), 4.77 (t,  $J = 7.7$  Hz, 1H), 3.91 (dd,  $J = 13.5, 8.1$  Hz, 1H), 3.45 (dd,  $J = 13.5, 7.4$  Hz, 1H);  $^{13}\text{C}$  NMR (100 MHz,  $\text{CDCl}_3$ )  $\delta$  (ppm) 140.37, 139.04, 138.33, 134.06, 133.84, 129.54, 129.48, 129.34, 127.10, 121.28, 58.69, 43.33. HRMS calculated for  $\text{C}_{14}\text{H}_{11}\text{ClNaO}_2\text{S}^+$   $[(\text{M}+\text{Na})^+]$  = 301.0062, found: 301.0060.

(-)-3-(naphthalen-2-yl)-2,3-dihydrobenzo[*b*]thiophene 1,1-dioxide **2u**

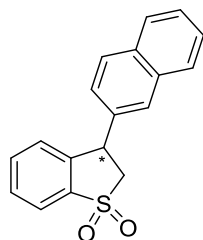

Colorless crystalline solid; >99% conv., 99% yield, 29.1 mg, >99% ee;  $[\alpha]_D^{20} = -49.64$  ( $c = 0.56$ ,  $\text{CHCl}_3$ ); The enantiomeric excess was determined by HPLC on Chiralpak AS-H column, hexane: isopropanol = 80:20; flow rate = 1.0 mL/min; UV detection at 220 nm;  $t_R = 37.5$  min (minor),  $t_R = 56.2$  min (major);  $^1\text{H}$  NMR (400 MHz,  $\text{CDCl}_3$ )  $\delta$  (ppm) 7.87-7.82 (m, 4H), 7.77 (d,  $J = 1.3$  Hz, 1H), 7.55-7.51 (m, 4H), 7.27-7.25 (m, 1H), 7.12-7.10 (m, 1H), 4.96 (t,  $J = 7.9$  Hz, 1H), 3.98 (dd,  $J = 13.6, 8.0$  Hz, 1H), 3.61 (dd,  $J = 13.6, 7.8$  Hz, 1H);  $^{13}\text{C}$  NMR (100 MHz,  $\text{CDCl}_3$ )  $\delta$  (ppm) 140.89, 139.12, 136.85, 133.75, 133.31, 132.83, 129.48, 129.19, 127.75, 127.73, 127.70, 127.31, 126.75, 126.51, 125.16, 121.21, 58.75, 44.14. HRMS calculated for  $\text{C}_{18}\text{H}_{14}\text{NaO}_2\text{S}^+$   $[(\text{M}+\text{Na})^+]$  = 317.0609, found: 317.0606.

(*R*)-3-methyl-2,3-dihydrobenzo[*b*]thiophene 1,1-dioxide **2v**

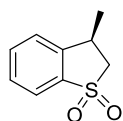

Colorless crystalline solid; >99% conv., 97% yield, 17.7 mg, 97% ee;  $[\alpha]_D^{20} = +30.7$  ( $c = 0.41$ ,  $\text{CHCl}_3$ ); The enantiomeric excess was determined by HPLC on Chiralpak AD-H column, hexane: isopropanol = 95:5; flow rate = 1.0 mL/min; UV detection at 220 nm;  $t_R = 26.1$  min (major), 27.7 min (minor).  $^1\text{H}$  NMR (400 MHz,  $\text{CDCl}_3$ )  $\delta$  (ppm) 7.73 (d,  $J = 7.8$  Hz, 1H), 7.64-7.60 (m, 1H), 7.49 (t,  $J = 7.5$  Hz, 1H), 7.44 (d,  $J = 7.8$  Hz, 1H), 3.74-3.65 (m, 2H), 3.17-3.10 (m, 1H), 1.54 (d,  $J = 6.8$  Hz, 3H);  $^{13}\text{C}$  NMR (100 MHz,  $\text{CDCl}_3$ )  $\delta$  (ppm) 142.34, 138.63, 133.64, 128.79, 125.52, 121.28, 57.90, 32.57, 19.83. The characterization data of compound **2v** is in accordance with the reported data in the literature.<sup>[2]</sup>

(*R*)-3-ethyl-2,3-dihydrobenzo[*b*]thiophene 1,1-dioxide **2w**

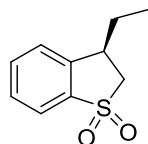

Colorless crystalline solid; >99% conv., 98% yield, 19.0 mg, 98% ee;  $[\alpha]_D^{20} = +81.73$  ( $c = 0.46$ ,  $\text{CHCl}_3$ ); The enantiomeric excess was determined by HPLC on Chiralpak AD-H column, hexane: isopropanol = 95:5; flow rate = 0.3 mL/min; UV detection at 220 nm;  $t_R = 83.0$  min (major),  $t_R = 87.2$  min (minor);  $^1\text{H}$  NMR (400 MHz,  $\text{CDCl}_3$ )  $\delta$  (ppm) 7.72 (d,  $J = 7.8$  Hz, 1H), 7.62-7.58 (m, 1H), 7.48 (t,  $J = 7.5$  Hz, 1H), 7.43-7.41 (m, 1H), 3.62 (dd,  $J = 13.0, 7.8$  Hz, 1H), 3.56-3.50 (m, 1H), 3.20 (dd,  $J = 13.0, 5.3$  Hz, 1H), 2.08-2.05 (m, 1H), 1.76-1.74 (m, 1H), 1.04 (t,  $J = 7.4$  Hz, 3H);  $^{13}\text{C}$  NMR (100 MHz,  $\text{CDCl}_3$ )  $\delta$  (ppm) 141.17, 138.99, 133.45, 128.89, 125.99, 121.41, 55.47, 39.40, 27.32, 11.55. HRMS calculated for  $\text{C}_{10}\text{H}_{12}\text{NaO}_2\text{S}^+$   $[(\text{M}+\text{Na})^+]$  = 219.0450, found: 219.0450.

(*R*)-3-propyl-2,3-dihydrobenzo[*b*]thiophene 1,1-dioxide **2x**

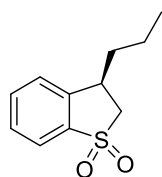

Colorless crystalline solid; >99% conv., 98% yield, 20.6 mg, 96% ee;  $[\alpha]_D^{20} = +36.87$  ( $c = 1.33$ ,  $\text{CHCl}_3$ ); The enantiomeric excess was determined by HPLC on Chiralpak AD-H column, hexane: isopropanol = 95:5; flow rate = 0.3 mL/min; UV detection at 220 nm;  $t_R = 69.1$  min (major),  $t_R = 73.2$  min (minor).  $^1\text{H}$  NMR (400 MHz,  $\text{CDCl}_3$ )  $\delta$  (ppm) 7.72 (d,  $J = 7.8$  Hz, 1H), 7.62-7.58 (m, 1H), 7.47 (t,  $J = 7.5$  Hz, 1H), 7.42 (d,  $J = 7.8$  Hz, 1H), 3.64-3.56 (m, 2H), 3.22-3.17 (m, 1H), 2.03-1.95 (m, 1H), 1.71-1.63 (m, 1H), 1.50-1.41 (m, 2H), 1.00 (t,  $J = 7.3$  Hz, 3H);  $^{13}\text{C}$  NMR (100 MHz,  $\text{CDCl}_3$ )  $\delta$  (ppm) 141.48, 138.85, 133.45, 128.86, 125.98, 121.42, 55.88, 37.80, 36.67, 20.57, 13.85. HRMS calculated for  $\text{C}_{11}\text{H}_{14}\text{NaO}_2\text{S}^+$   $[(\text{M}+\text{Na})^+]$  = 233.0609, found: 233.0606.

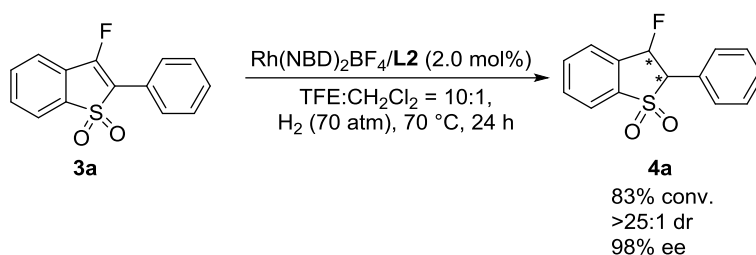

Colorless crystalline solid; 83% conv., >25:1 dr, 98% ee;  $[\alpha]_D^{20} = +56.00$  ( $c = 0.35$ ,  $\text{CHCl}_3$ ); The dr value was analyzed by  $^1\text{H}$  NMR spectroscopy; The enantiomeric excess was determined by HPLC on Chiralcel OD-H column, hexane: isopropanol = 90:10; flow rate = 1.0 mL/min; UV detection at 220 nm;  $t_R = 35.0$  min (major),  $t_R = 71.3$  min (minor).  $^1\text{H}$  NMR (400 MHz,  $\text{CDCl}_3$ )  $\delta$  (ppm) 7.93 (d,  $J = 7.5$  Hz, 1H), 7.79-7.73 (m, 3H), 7.58-7.55 (m, 2H), 7.50-7.43 (m, 3H), 6.11 (dd,  $J = 53.3, 5.1$  Hz, 1H), 4.70 (dd,  $J = 24.0, 5.1$  Hz, 1H);  $^{13}\text{C}$  NMR (100 MHz,  $\text{CDCl}_3$ )  $\delta$  (ppm) 139.80 (d,  $J = 3.0$  Hz), 134.00 (d,  $J = 3.0$  Hz), 133.60 (d,  $J = 18.0$  Hz), 132.43 (d,  $J = 3.0$  Hz), 131.78 (d,  $J = 3.0$  Hz), 129.75, 128.72, 128.15, 126.32, 122.45, 87.11 (d,  $J = 190.0$  Hz), 69.87 (d,  $J = 20.0$  Hz). HRMS calculated for  $\text{C}_{14}\text{H}_{11}\text{FNaO}_2\text{S}^+$   $[(\text{M}+\text{Na})^+]$  = 285.0356, found: 285.0355.

#### 4. General procedure for the high TON experiment

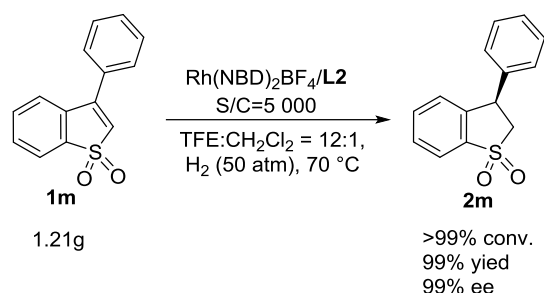

A stock solution was made by mixing  $[\text{Rh}(\text{NBD})_2]\text{BF}_4$  with *N*-methylated ZhaoPhos **L2** in a 1:1.1 molar ratio in  $\text{CH}_2\text{Cl}_2$  at room temperature for 40 min in a nitrogen-filled glovebox. An aliquot of the catalyst solution (0.001 mmol) was transferred by syringe into a hydrogenated vial charged with **1m** (5.0 mmol, 1.21 g) in anhydrous  $\text{CF}_3\text{CH}_2\text{OH}:\text{CH}_2\text{Cl}_2 = 12:1$  (8 mL). The cup was subsequently transferred into an autoclave into which hydrogen gas was charged. The reaction was then stirred under  $\text{H}_2$  (50 atm) at  $70\ ^\circ\text{C}$  for 120 h. After completed, the hydrogen gas was released slowly and carefully. The product **2m** was obtained by a column of silica gel (petroleum ether–EtOAc).

#### 5. General procedure for Job plot

In order to inspect the possible catalytic model, the experiments for the investigation of the nonlinear effect and  $^1\text{H}$  NMR titration were conducted. The asymmetric hydrogenation of substrate **1m** was performed in the presence of ligand **L2** with different ee values (Table S1). As shown in Figure S1, no nonlinear effect was observed in this Rh-catalyzed asymmetric hydrogenation, which displayed that it should be no catalyst self-aggregation or ligand-substrate agglomeration in this catalytic system.

**Table S1.** Nonlinear effect for Rh/ligand **L2**-catalyzed asymmetric hydrogenation of **1m**.

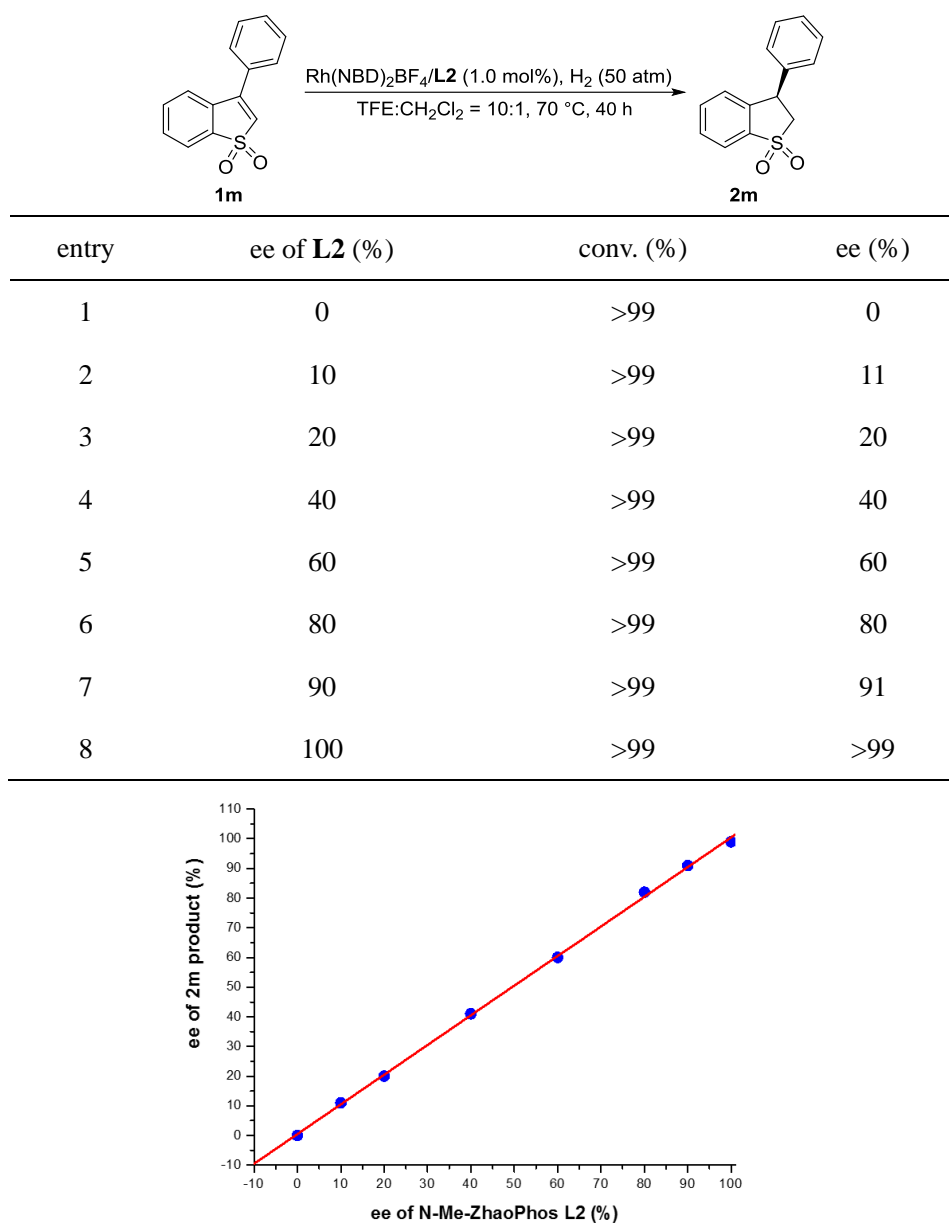

**Figure S1.** Nonlinear effect of the hydrogenation of substrate **1m** using ligand **L2** with different ee values

A series of  $^1\text{H}$  NMR titration experiments were conducted in chloroform- $d$ , which was dried with potassium carbonate and degassed. The total concentration of the host (**1m**) and the guest (ligand **L2**) was 0.02 M. The proportion of the concentration of the host vs the total concentration varied, the chemical shifts of the proton on the 2-position of **1m** were recorded (Table S2). A Job plot was drawn (Figure S2) and the curve suggests a 1:1 binding pattern between ligand **L2** and substrate **1m**.



**Table S2.** Data for Job plot.

| NO. | c <sub>1</sub> ( <b>1m</b> ) | c <sub>2</sub> ( <b>L2</b> ) | δ (H- <b>1m</b> ) | Δδ (H- <b>1m</b> ) | Δδ*10 <sup>4</sup> *c <sub>1</sub> /0.02 |
|-----|------------------------------|------------------------------|-------------------|--------------------|------------------------------------------|
| 1   | 0.02                         | 0                            | 6.6569            | 0                  | 0                                        |
| 2   | 0.016                        | 0.004                        | 6.6556            | 0.0013             | 10.4                                     |
| 3   | 0.014                        | 0.006                        | 6.6551            | 0.0018             | 12.6                                     |
| 4   | 0.012                        | 0.008                        | 6.6547            | 0.0022             | 13.2                                     |
| 5   | 0.01                         | 0.01                         | 6.6542            | 0.0027             | 13.5                                     |
| 6   | 0.008                        | 0.012                        | 6.6538            | 0.0031             | 12.4                                     |
| 7   | 0.006                        | 0.014                        | 6.6532            | 0.0037             | 11.1                                     |
| 8   | 0.004                        | 0.016                        | 6.6527            | 0.0042             | 8.4                                      |

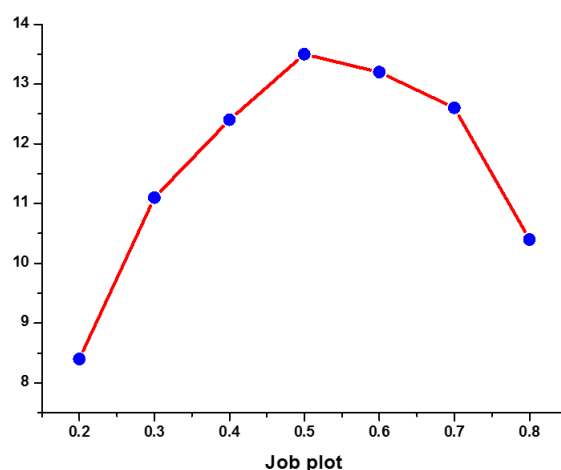**Figure S2.** Job plot of ligand **L2** and **1m**,  $x = c(\mathbf{1m})/[c(\text{ligand } \mathbf{L2}) + c(\mathbf{1m})]$ ,  $y = \Delta\delta \cdot 10^4 \cdot c(\mathbf{1m})/[c(\text{ligand } \mathbf{L2}) + c(\mathbf{1m})]$ 

## 6. General computational calculation (DFT) details

DFT calculations were performed using the M06-L method<sup>[12]</sup> with the Gaussian09 program<sup>[13]</sup>. The 6-31G(d) basis set was used for the C, H, N, O, F, S and P, and the SDD basis set was used for the Rh and Fe. Solvent effect and Grimme's dispersion correction<sup>[14]</sup> were applied during geometry optimization. The parameter of int=ultrafine was used. Mixture of 2,2,2-trifluoroethanol and dichloromethane (10:1) was employed as the solvents. The solvent effects were considered using SMD continuum solvation model<sup>[15]</sup>. Frequency calculations at the same level of theory

have been performed to identify all of the stationary points as minima (zero imaginary frequencies) and to provide free energies at 298.15 K.

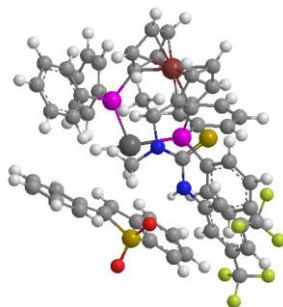

Rh(III)HH-1a-pro-(S) I:

|                                              |             |             |              |
|----------------------------------------------|-------------|-------------|--------------|
| Thermal correction to Gibbs Free Energy=     |             |             | 0.852493     |
| Sum of electronic and thermal Free Energies= |             |             | -4887.807460 |
| Fe                                           | 2.42478900  | -3.29284100 | -0.46493600  |
| S                                            | -2.37544200 | -3.34083100 | 1.17685000   |
| N                                            | -0.71879400 | -1.31952700 | 1.79913300   |
| N                                            | -2.84536300 | -0.67979800 | 1.31749800   |
| F                                            | -5.53705100 | 2.33804900  | -1.45188100  |
| F                                            | -7.11988100 | 1.02373800  | -2.14819800  |
| F                                            | -7.44382800 | 2.27296300  | -0.41196400  |
| F                                            | -7.53634000 | -2.55549300 | 2.91741500   |
| F                                            | -6.88382000 | -3.89657400 | 1.35078400   |
| F                                            | -8.58921800 | -2.59159300 | 1.01899300   |
| C                                            | 0.49554100  | -2.16166100 | 1.69788600   |
| C                                            | -1.96880800 | -1.73402200 | 1.44467700   |
| C                                            | -4.20819800 | -0.69686200 | 0.99626000   |
| C                                            | -6.01663600 | 0.41187800  | -0.16062100  |
| C                                            | -6.44170900 | -1.59913200 | 1.06322200   |
| C                                            | -6.52050300 | 1.51364800  | -1.03853800  |
| C                                            | -7.36751300 | -2.65649400 | 1.57946100   |
| C                                            | 0.63905200  | -2.91215700 | 0.39735600   |
| C                                            | 0.84556500  | -4.32081000 | 0.29792900   |

|   |             |             |             |
|---|-------------|-------------|-------------|
| C | 1.03949300  | -4.66873900 | -1.06493700 |
| C | 0.95086200  | -3.48158800 | -1.83797300 |
| C | 0.70964300  | -2.37537300 | -0.95188800 |
| C | 3.86182600  | -1.92386400 | -0.05943900 |
| C | 3.87529600  | -2.99731700 | 0.90439300  |
| C | 4.10787400  | -4.21708600 | 0.20999500  |
| C | 4.22294800  | -3.92460000 | -1.17938700 |
| C | 4.05692800  | -2.52205500 | -1.35910400 |
| H | -2.41516600 | 0.22941900  | 1.15669800  |
| H | 1.27855200  | -5.65653700 | -1.44347000 |
| H | 1.10386200  | -3.40545700 | -2.90916100 |
| H | 3.73179300  | -2.88663700 | 1.97430900  |
| H | 4.12963000  | -5.20360100 | 0.65991200  |
| H | 4.35020100  | -4.65010100 | -1.97539800 |
| H | 4.08551600  | -1.99608600 | -2.30744600 |
| C | 0.66496000  | -3.03749400 | 2.93133700  |
| H | 0.62358300  | -2.42492700 | 3.83874600  |
| H | -0.12802700 | -3.78963600 | 2.98464200  |
| H | 1.63526000  | -3.54645400 | 2.91432600  |
| H | 1.30941900  | -1.41783000 | 1.72053400  |
| C | -0.52604700 | -0.07928200 | 2.53926400  |
| H | -0.26182000 | 0.76795900  | 1.88518300  |
| H | -1.43404600 | 0.19049800  | 3.08481800  |
| H | 0.27906100  | -0.21997800 | 3.26849700  |
| H | 0.89349300  | -5.00495400 | 1.13822000  |
| P | 0.61641600  | -0.64642400 | -1.49618600 |
| P | 3.73328200  | -0.15979700 | 0.34140500  |
| C | 1.35413100  | -0.69326200 | -3.18369900 |
| C | 0.62698900  | -1.21344700 | -4.26466200 |
| C | 2.64680200  | -0.20996400 | -3.41988300 |

|   |             |             |             |
|---|-------------|-------------|-------------|
| C | 1.18611100  | -1.26096200 | -5.53827300 |
| H | -0.38600500 | -1.58429300 | -4.11045700 |
| C | 3.20771100  | -0.25775400 | -4.69418600 |
| H | 3.23028300  | 0.20886400  | -2.60070500 |
| C | 2.47773500  | -0.78390600 | -5.75680900 |
| H | 0.60702700  | -1.66949300 | -6.36375500 |
| H | 4.21494900  | 0.12347300  | -4.85125500 |
| H | 2.91058800  | -0.81687500 | -6.75435100 |
| C | 5.16731900  | 0.58636400  | -0.50949100 |
| C | 6.26758700  | -0.20425100 | -0.87307400 |
| C | 5.20855700  | 1.96636700  | -0.75317900 |
| C | 7.38033000  | 0.37724400  | -1.47479300 |
| H | 6.25920600  | -1.27702200 | -0.69087600 |
| C | 6.32392800  | 2.54110200  | -1.35350000 |
| H | 4.36304900  | 2.59221000  | -0.47231900 |
| C | 7.40974200  | 1.74775000  | -1.71928700 |
| H | 8.22456500  | -0.24845700 | -1.75549700 |
| H | 6.34030500  | 3.61255000  | -1.54015400 |
| H | 8.27772000  | 2.19784900  | -2.19612000 |
| C | -1.15345000 | -0.44162700 | -1.92756200 |
| C | -1.58592000 | 0.78373900  | -2.45360800 |
| C | -2.04946600 | -1.51595100 | -1.87726000 |
| C | -2.88283400 | 0.91907000  | -2.94106500 |
| H | -0.89458800 | 1.62841900  | -2.50635800 |
| C | -3.35259400 | -1.36958900 | -2.34754100 |
| H | -1.73167300 | -2.47376600 | -1.47038900 |
| C | -3.76707400 | -0.15777200 | -2.89282400 |
| H | -3.20679000 | 1.86923200  | -3.36096200 |
| H | -4.04326800 | -2.20969000 | -2.28503300 |
| H | -4.78366100 | -0.04487100 | -3.26565800 |

|    |             |             |             |
|----|-------------|-------------|-------------|
| C  | 4.14329500  | -0.16577100 | 2.12460400  |
| C  | 3.26277800  | 0.33739800  | 3.08745500  |
| C  | 5.34934400  | -0.75145800 | 2.53742600  |
| C  | 3.56349000  | 0.22073300  | 4.44362600  |
| H  | 2.34815100  | 0.84912200  | 2.78556600  |
| C  | 5.65681100  | -0.84370000 | 3.88963000  |
| H  | 6.04689200  | -1.14504900 | 1.79810700  |
| C  | 4.75709800  | -0.37082000 | 4.84558000  |
| H  | 2.86279400  | 0.60541200  | 5.18204100  |
| H  | 6.59780400  | -1.29381400 | 4.19779600  |
| H  | 4.99309000  | -0.45710400 | 5.90395200  |
| Rh | 1.81463300  | 0.89782600  | -0.03977500 |
| H  | 2.70665000  | 1.94566700  | 0.79395800  |
| H  | 2.50620200  | 1.53102100  | -1.24652500 |
| C  | -1.36644600 | 3.96053900  | -0.96667000 |
| C  | 0.00094100  | 4.02747500  | -1.26446500 |
| C  | 0.20926400  | 3.63843000  | 1.07740200  |
| C  | 0.85375900  | 3.86545900  | -0.09614900 |
| S  | -1.56893800 | 3.59952200  | 0.75950800  |
| O  | -2.24412600 | 4.67971700  | 1.48276600  |
| O  | -2.09541600 | 2.23140400  | 0.92856700  |
| C  | -6.91262900 | -0.57412500 | 0.25298500  |
| H  | -7.95482200 | -0.53976100 | -0.05156300 |
| C  | -4.68154200 | 0.35988700  | 0.20729400  |
| H  | -3.98804600 | 1.12193200  | -0.13993200 |
| C  | -5.10269000 | -1.66630300 | 1.44874300  |
| H  | -4.76129900 | -2.46991100 | 2.09137200  |
| C  | -2.35746400 | 4.12064100  | -1.91398500 |
| H  | -3.41111000 | 4.06708500  | -1.64841000 |
| C  | -1.95277500 | 4.35173500  | -3.23396100 |

|   |             |            |             |
|---|-------------|------------|-------------|
| H | -2.70409700 | 4.48968400 | -4.00768400 |
| C | -0.59783100 | 4.39861000 | -3.56267400 |
| H | -0.30362600 | 4.56817100 | -4.59552400 |
| C | 0.38852400  | 4.24051200 | -2.58677900 |
| H | 1.44421000  | 4.28679900 | -2.84754400 |
| C | 0.71816700  | 3.51264800 | 2.42902300  |
| C | -0.10486900 | 3.07790800 | 3.48283300  |
| C | 2.06260500  | 3.82574200 | 2.70801800  |
| C | 0.40440200  | 2.94791900 | 4.77020600  |
| H | -1.14788600 | 2.82750600 | 3.29571000  |
| C | 2.56337400  | 3.69848600 | 3.99482400  |
| H | 2.71135100  | 4.17878300 | 1.90835600  |
| C | 1.73685700  | 3.25915700 | 5.03132000  |
| H | -0.24614700 | 2.60567200 | 5.57188700  |
| H | 3.60462900  | 3.94352500 | 4.19275300  |
| H | 2.13302200  | 3.16235000 | 6.04000400  |
| H | 1.93361300  | 3.97413600 | -0.16895000 |

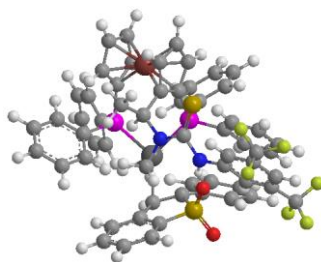

Rh(III)HH-1a-pro-(*R*) II:

|                                              |             |             |              |
|----------------------------------------------|-------------|-------------|--------------|
| Thermal correction to Gibbs Free Energy=     |             |             | 0.860058     |
| Sum of electronic and thermal Free Energies= |             |             | -4887.800670 |
| Fe                                           | 2.07779300  | -2.57936200 | -2.16863700  |
| S                                            | -2.83940600 | -3.14830900 | -1.01451700  |
| N                                            | -1.13541300 | -2.07720900 | 0.77621900   |
| N                                            | -3.19818000 | -1.13528100 | 0.75469500   |
| F                                            | -5.68749000 | 3.08071500  | 0.28774400   |

|   |             |             |             |
|---|-------------|-------------|-------------|
| F | -6.90541500 | 2.48062600  | -1.40461200 |
| F | -7.77036500 | 2.52611500  | 0.57910700  |
| F | -8.43638700 | -2.87969700 | 1.07338600  |
| F | -7.30997300 | -3.77804300 | -0.54437300 |
| F | -8.82764600 | -2.28138000 | -0.97161900 |
| C | 0.06670200  | -2.71555400 | 0.19022600  |
| C | -2.37741400 | -2.10292800 | 0.21495100  |
| C | -4.54295000 | -0.87847000 | 0.46690100  |
| C | -6.24880700 | 0.78964100  | 0.09237700  |
| C | -6.81460200 | -1.53673700 | 0.01200300  |
| C | -6.64625700 | 2.21942000  | -0.10075700 |
| C | -7.84304900 | -2.61790500 | -0.11404900 |
| C | 0.27130400  | -2.47971400 | -1.28663600 |
| C | 0.28305500  | -3.52856000 | -2.25715900 |
| C | 0.60495200  | -2.99071200 | -3.52862500 |
| C | 0.79698700  | -1.59371500 | -3.37674300 |
| C | 0.60831000  | -1.24699700 | -1.99148800 |
| C | 3.57886400  | -2.02752700 | -0.95149900 |
| C | 3.36396200  | -3.45047700 | -0.87863700 |
| C | 3.54552000  | -3.99680900 | -2.17904100 |
| C | 3.87133800  | -2.93287800 | -3.06801900 |
| C | 3.88696000  | -1.71711100 | -2.32750300 |
| H | -2.69937000 | -0.31938400 | 1.11045300  |
| H | 0.74588900  | -3.55396400 | -4.44454800 |
| H | 1.10744200  | -0.90951700 | -4.15856600 |
| H | 3.10121700  | -4.00298000 | 0.01660900  |
| H | 3.40501000  | -5.03750800 | -2.44975100 |
| H | 4.02324300  | -3.01890100 | -4.13835300 |
| H | 4.09452100  | -0.73193000 | -2.73100500 |
| C | 0.12667000  | -4.18785100 | 0.58030500  |

|   |             |             |             |
|---|-------------|-------------|-------------|
| H | 0.09754500  | -4.29558600 | 1.67005500  |
| H | -0.72616200 | -4.72850400 | 0.15839300  |
| H | 1.04922600  | -4.65465800 | 0.22145600  |
| H | 0.88936300  | -2.19407500 | 0.70930900  |
| C | -0.95421100 | -1.67479000 | 2.16499100  |
| H | -0.49889300 | -0.68339100 | 2.24901200  |
| H | -1.91254000 | -1.66119200 | 2.68774500  |
| H | -0.30304300 | -2.39987800 | 2.66786500  |
| H | 0.11346000  | -4.57682500 | -2.03803600 |
| P | 0.77824100  | 0.47415700  | -1.41141000 |
| P | 3.53161300  | -0.87636400 | 0.44835800  |
| C | 1.82550300  | 1.28160300  | -2.69365600 |
| C | 1.27720200  | 1.62283300  | -3.94032000 |
| C | 3.17265900  | 1.58416600  | -2.45969000 |
| C | 2.05388500  | 2.24225500  | -4.91463000 |
| H | 0.23089100  | 1.40784800  | -4.15060900 |
| C | 3.95164300  | 2.20466200  | -3.43317100 |
| H | 3.63891100  | 1.32894400  | -1.50950600 |
| C | 3.39249900  | 2.53834900  | -4.66354600 |
| H | 1.60685000  | 2.49786100  | -5.87280700 |
| H | 4.99525500  | 2.42842300  | -3.22063800 |
| H | 3.99569200  | 3.03041500  | -5.42336500 |
| C | 5.17997700  | -0.07932800 | 0.34803300  |
| C | 6.22927500  | -0.72036000 | -0.32819400 |
| C | 5.43310700  | 1.14888900  | 0.97505400  |
| C | 7.49331800  | -0.14005100 | -0.38007200 |
| H | 6.06246000  | -1.67462400 | -0.82345800 |
| C | 6.69800800  | 1.72622800  | 0.91901200  |
| H | 4.64161900  | 1.66220600  | 1.51686300  |
| C | 7.72994400  | 1.08544300  | 0.23767600  |



|    |             |             |             |
|----|-------------|-------------|-------------|
| H  | 8.29381500  | -0.64991900 | -0.91134100 |
| H  | 6.87216500  | 2.68216200  | 1.40770100  |
| H  | 8.71663900  | 1.54057100  | 0.18793200  |
| C  | -0.86900200 | 1.15440900  | -1.81883700 |
| C  | -1.02733900 | 2.53683300  | -1.96783800 |
| C  | -1.97521400 | 0.31890400  | -1.99549900 |
| C  | -2.28108800 | 3.07798700  | -2.23415700 |
| H  | -0.16170300 | 3.19194000  | -1.89993600 |
| C  | -3.22526100 | 0.86178500  | -2.28287000 |
| H  | -1.86629300 | -0.76211400 | -1.93292200 |
| C  | -3.38745000 | 2.24209600  | -2.38130400 |
| H  | -2.38938200 | 4.15651900  | -2.33812800 |
| H  | -4.07585400 | 0.19651200  | -2.42719100 |
| H  | -4.36967000 | 2.66354400  | -2.58687000 |
| C  | 3.61570400  | -2.00285600 | 1.88582300  |
| C  | 2.65636400  | -1.93483200 | 2.90108000  |
| C  | 4.64065200  | -2.95508800 | 1.97711600  |
| C  | 2.70108900  | -2.81544600 | 3.97943200  |
| H  | 1.86952700  | -1.18100100 | 2.86116000  |
| C  | 4.69103500  | -3.82597400 | 3.05975700  |
| H  | 5.39972300  | -3.01737500 | 1.19743000  |
| C  | 3.71779700  | -3.76262100 | 4.05800900  |
| H  | 1.94176700  | -2.75385900 | 4.75678400  |
| H  | 5.49250300  | -4.55845200 | 3.12337200  |
| H  | 3.75782900  | -4.45037000 | 4.89974200  |
| Rh | 1.83493300  | 0.74917400  | 0.80345600  |
| H  | 2.88618700  | 0.66674500  | 2.00927600  |
| H  | 2.83078900  | 1.69601600  | 0.17387400  |
| C  | -0.39214800 | 1.50837700  | 3.52036300  |
| C  | 0.99821200  | 1.56872000  | 3.60044100  |

|   |             |             |             |
|---|-------------|-------------|-------------|
| C | 0.71897100  | 2.67372100  | 1.44159800  |
| C | 1.62517600  | 2.23353200  | 2.44297100  |
| S | -0.96848700 | 2.32081900  | 2.05376200  |
| O | -1.69719100 | 1.37446700  | 1.18973200  |
| O | -1.65536400 | 3.56647700  | 2.41623300  |
| C | -7.20328600 | -0.20573000 | -0.10643000 |
| H | -8.23063900 | 0.05170100  | -0.35076900 |
| C | -4.93156500 | 0.46347800  | 0.38457400  |
| H | -4.18750900 | 1.24556600  | 0.51594100  |
| C | -5.49773900 | -1.88384300 | 0.30344400  |
| H | -5.21458100 | -2.92581300 | 0.39753900  |
| C | -1.18193500 | 0.89026900  | 4.47790100  |
| H | -2.26538200 | 0.85724700  | 4.38181600  |
| C | -0.53218700 | 0.30954600  | 5.56611400  |
| H | -1.11559000 | -0.18422400 | 6.33897300  |
| C | 0.86116500  | 0.36341400  | 5.67283600  |
| H | 1.35016700  | -0.09534900 | 6.52894600  |
| C | 1.63532700  | 0.98610300  | 4.69668600  |
| H | 2.72150600  | 1.00404000  | 4.77262000  |
| C | 0.95562700  | 3.86819400  | 0.60089500  |
| C | -0.08926500 | 4.66602800  | 0.11029400  |
| C | 2.27349200  | 4.24706000  | 0.28447000  |
| C | 0.17488400  | 5.78602700  | -0.67372100 |
| H | -1.12191700 | 4.41452800  | 0.32956600  |
| C | 2.53312100  | 5.35725000  | -0.50724100 |
| H | 3.11461600  | 3.66080100  | 0.65363000  |
| C | 1.48252300  | 6.13483400  | -0.99451400 |
| H | -0.65784900 | 6.38244900  | -1.04133800 |
| H | 3.56359000  | 5.61440300  | -0.74322000 |
| H | 1.68491800  | 7.00366100  | -1.61667900 |

|   |            |            |            |
|---|------------|------------|------------|
| H | 2.56490600 | 2.76248700 | 2.59413000 |
|---|------------|------------|------------|

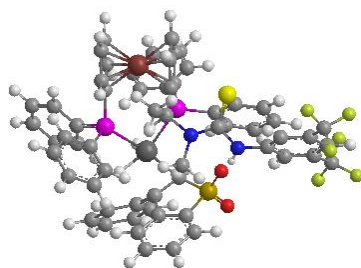

Rh(III)HH-**1m**-pro-(*S*) **III**:

|                                          |          |
|------------------------------------------|----------|
| Thermal correction to Gibbs Free Energy= | 0.856984 |
|------------------------------------------|----------|

|                                              |              |
|----------------------------------------------|--------------|
| Sum of electronic and thermal Free Energies= | -4887.806304 |
|----------------------------------------------|--------------|

|    |             |             |             |
|----|-------------|-------------|-------------|
| Fe | -1.54599200 | -3.56938500 | 0.59663800  |
| S  | 3.29097800  | -2.88152200 | -0.63516500 |
| N  | 1.41556100  | -1.19075800 | -1.58445300 |
| N  | 3.44443700  | -0.24485500 | -1.17125200 |
| F  | 5.83109800  | 3.23665800  | 1.41969400  |
| F  | 6.75696800  | 1.74299800  | 2.68931100  |
| F  | 7.95208900  | 2.79611800  | 1.22042400  |
| F  | 8.78870900  | -1.09874500 | -2.44351600 |
| F  | 7.73892900  | -2.84753100 | -1.71084100 |
| F  | 9.17042300  | -1.82013600 | -0.43753900 |
| C  | 0.32259700  | -2.18110800 | -1.43675700 |
| C  | 2.69477100  | -1.40134300 | -1.15900200 |
| C  | 4.78582500  | -0.10197600 | -0.79454200 |
| C  | 6.42820900  | 1.17204600  | 0.43340100  |
| C  | 7.10588400  | -0.74740400 | -0.83014900 |
| C  | 6.74126700  | 2.24403800  | 1.42845600  |
| C  | 8.19563200  | -1.63248200 | -1.35094800 |
| C  | 0.18995600  | -2.80460800 | -0.06899100 |
| C  | 0.33369200  | -4.20457700 | 0.17832500  |
| C  | 0.02886700  | -4.47678600 | 1.53579000  |
| C  | -0.30978600 | -3.25058600 | 2.16308000  |

|   |             |             |             |
|---|-------------|-------------|-------------|
| C | -0.22358000 | -2.19310600 | 1.18798200  |
| C | -3.16194400 | -2.62996800 | -0.14458400 |
| C | -2.78217100 | -3.72872000 | -0.99280200 |
| C | -2.82965200 | -4.92438500 | -0.22349600 |
| C | -3.23868400 | -4.58735900 | 1.09883400  |
| C | -3.44065000 | -3.17977700 | 1.16064100  |
| H | 2.89397100  | 0.60163300  | -1.03102400 |
| H | -0.00607900 | -5.45642900 | 1.99954100  |
| H | -0.64103400 | -3.13361300 | 3.18890500  |
| H | -2.49975800 | -3.64900400 | -2.03679300 |
| H | -2.54875900 | -5.91093600 | -0.57574800 |
| H | -3.32649900 | -5.27331600 | 1.93420700  |
| H | -3.74897500 | -2.62141800 | 2.03776400  |
| C | 0.39030900  | -3.20977800 | -2.56087900 |
| H | 0.33295600  | -2.71584100 | -3.53680800 |
| H | 1.33113400  | -3.76662100 | -2.50938000 |
| H | -0.43807500 | -3.92133800 | -2.49680300 |
| H | -0.58094400 | -1.56657600 | -1.59359800 |
| C | 1.10243500  | -0.14938400 | -2.55791700 |
| H | 0.49470800  | 0.65440100  | -2.12568500 |
| H | 2.01589500  | 0.28662100  | -2.96492700 |
| H | 0.53942800  | -0.59217600 | -3.38867400 |
| H | 0.59459300  | -4.94176100 | -0.57265700 |
| P | -0.61844600 | -0.46894800 | 1.61214400  |
| P | -3.34255800 | -0.89687800 | -0.65293600 |
| C | -1.63160800 | -0.61205300 | 3.13954300  |
| C | -1.01201600 | -0.88599800 | 4.36849500  |
| C | -3.02268100 | -0.45895300 | 3.11417700  |
| C | -1.76732300 | -1.01164000 | 5.53051000  |
| H | 0.06973900  | -1.00162500 | 4.41814200  |

|   |             |             |             |
|---|-------------|-------------|-------------|
| C | -3.77956900 | -0.58379700 | 4.27652000  |
| H | -3.53638200 | -0.24602900 | 2.17805500  |
| C | -3.15249000 | -0.86028100 | 5.48850400  |
| H | -1.26836100 | -1.22537100 | 6.47319100  |
| H | -4.85969100 | -0.45930900 | 4.22726300  |
| H | -3.73989500 | -0.95271900 | 6.39937100  |
| C | -5.05170700 | -0.54719100 | -0.09591700 |
| C | -6.00103200 | -1.58134600 | -0.07141800 |
| C | -5.44285500 | 0.73774700  | 0.29758400  |
| C | -7.30976600 | -1.32530600 | 0.32379100  |
| H | -5.71708300 | -2.59538000 | -0.34752900 |
| C | -6.75213100 | 0.98944400  | 0.69828000  |
| H | -4.72249200 | 1.55289900  | 0.29880800  |
| C | -7.68844300 | -0.04078800 | 0.71041000  |
| H | -8.03352800 | -2.13712800 | 0.33677300  |
| H | -7.03396200 | 1.99459300  | 1.00571800  |
| H | -8.71073500 | 0.15371200  | 1.02737100  |
| C | 0.95218700  | 0.17586700  | 2.28274500  |
| C | 0.94139100  | 1.37113200  | 3.01538100  |
| C | 2.16208500  | -0.49260700 | 2.07986200  |
| C | 2.12742200  | 1.90441200  | 3.50727600  |
| H | -0.00226400 | 1.87258200  | 3.23041300  |
| C | 3.34702100  | 0.04014900  | 2.58429800  |
| H | 2.18659100  | -1.43570700 | 1.53418200  |
| C | 3.33581000  | 1.24452300  | 3.28372600  |
| H | 2.10693700  | 2.83391500  | 4.07249300  |
| H | 4.28456500  | -0.49176300 | 2.42493400  |
| H | 4.26452100  | 1.66282300  | 3.66587700  |
| C | -3.40213200 | -1.02078200 | -2.47827400 |
| C | -2.55702600 | -0.23322900 | -3.26902900 |

|    |             |             |             |
|----|-------------|-------------|-------------|
| C  | -4.28043200 | -1.91517100 | -3.10598800 |
| C  | -2.57313400 | -0.34586100 | -4.65725900 |
| H  | -1.88444200 | 0.48903300  | -2.80460600 |
| C  | -4.30427200 | -2.01851200 | -4.49240800 |
| H  | -4.94670600 | -2.53789200 | -2.51046000 |
| C  | -3.44672800 | -1.23959000 | -5.26989600 |
| H  | -1.90410400 | 0.27158900  | -5.25376600 |
| H  | -4.99386000 | -2.71265300 | -4.96725800 |
| H  | -3.46441400 | -1.32843600 | -6.35381900 |
| Rh | -1.82541200 | 0.83678200  | -0.05643700 |
| H  | -2.95372500 | 1.36260200  | -1.07714700 |
| H  | -2.79832900 | 1.21803600  | 1.04594500  |
| C  | 0.28684300  | 3.24546900  | -1.78136100 |
| C  | -1.10983500 | 3.24177200  | -1.82074000 |
| C  | -0.77801900 | 2.66267200  | 0.50000700  |
| C  | -1.73857800 | 3.05006900  | -0.47857800 |
| H  | -0.89755900 | 2.93286600  | 1.54592400  |
| C  | -2.95328900 | 3.83265200  | -0.11472300 |
| C  | -4.16432400 | 3.71824200  | -0.81028800 |
| C  | -2.85790300 | 4.77896800  | 0.91417700  |
| C  | -5.25011700 | 4.52252800  | -0.48463400 |
| H  | -4.27404200 | 2.96058700  | -1.58633500 |
| C  | -3.94748300 | 5.58133600  | 1.24301800  |
| H  | -1.91452900 | 4.90809700  | 1.44242700  |
| C  | -5.14601700 | 5.45571700  | 0.54624000  |
| H  | -6.18522700 | 4.40686900  | -1.02862500 |
| H  | -3.85314300 | 6.31000900  | 2.04505900  |
| H  | -5.99839200 | 6.07950200  | 0.80609000  |
| S  | 0.86777400  | 2.98270800  | -0.12548600 |
| O  | 1.77238900  | 1.82235100  | -0.12028000 |

|   |             |             |             |
|---|-------------|-------------|-------------|
| O | 1.35013200  | 4.21788700  | 0.50383900  |
| C | 7.43660500  | 0.30818700  | 0.01708100  |
| H | 8.46175200  | 0.45331500  | 0.34683700  |
| C | 5.11289200  | 0.98006600  | 0.02641400  |
| H | 4.32659000  | 1.64881300  | 0.36936800  |
| C | 5.79422500  | -0.95865600 | -1.24317700 |
| H | 5.55250400  | -1.78198900 | -1.90587300 |
| C | 1.08078100  | 3.38250200  | -2.91009700 |
| H | 2.16654800  | 3.36868800  | -2.83838900 |
| C | 0.43696600  | 3.52732800  | -4.13711300 |
| H | 1.02467400  | 3.63528600  | -5.04504900 |
| C | -0.95873700 | 3.53649600  | -4.20393500 |
| H | -1.44864800 | 3.64861900  | -5.16816400 |
| C | -1.73799600 | 3.39981500  | -3.05745700 |
| H | -2.82258700 | 3.39984200  | -3.13563300 |

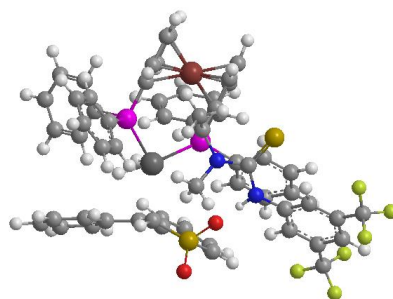

Rh(III)HH-1m-pro-(*R*) IV:

|                                              |             |             |              |
|----------------------------------------------|-------------|-------------|--------------|
| Thermal correction to Gibbs Free Energy=     |             |             | 0.855831     |
| Sum of electronic and thermal Free Energies= |             |             | -4887.790620 |
| Fe                                           | 1.63346300  | 3.29458000  | 1.49130300   |
| S                                            | -3.15750800 | 3.29098400  | -0.19192500  |
| N                                            | -1.26996100 | 1.84388300  | -1.45788900  |
| N                                            | -3.29064200 | 0.82758800  | -1.29871500  |
| F                                            | -5.52707900 | -3.30789400 | 0.12406900   |
| F                                            | -6.99279100 | -2.43980500 | 1.47105700   |

|   |             |             |             |
|---|-------------|-------------|-------------|
| F | -7.58264100 | -3.02817600 | -0.52537500 |
| F | -8.74962000 | 1.89518300  | -2.17613400 |
| F | -7.63826600 | 3.38835800  | -1.06275100 |
| F | -8.98742600 | 2.03369900  | -0.02920200 |
| C | -0.15492800 | 2.70773200  | -1.00214900 |
| C | -2.55579100 | 1.95624600  | -1.01370900 |
| C | -4.63324400 | 0.55742400  | -1.01117700 |
| C | -6.25102400 | -1.09447600 | -0.31224400 |
| C | -6.96512600 | 1.13115300  | -0.83884600 |
| C | -6.57912000 | -2.46837100 | 0.18212800  |
| C | -8.07775100 | 2.11649400  | -1.02282100 |
| C | -0.07366900 | 2.89755800  | 0.49142400  |
| C | -0.17167500 | 4.16220300  | 1.14715400  |
| C | 0.02145500  | 3.98056600  | 2.54091200  |
| C | 0.24253400  | 2.59803700  | 2.77617300  |
| C | 0.20172700  | 1.90215300  | 1.51766600  |
| C | 3.27823100  | 2.53456500  | 0.61061400  |
| C | 3.05063800  | 3.89267900  | 0.18380400  |
| C | 3.07178900  | 4.73043800  | 1.33309900  |
| C | 3.30396200  | 3.91311800  | 2.47653500  |
| C | 3.42095300  | 2.56089700  | 2.04639800  |
| H | -2.73234000 | -0.01918000 | -1.40647200 |
| H | 0.06177800  | 4.76566100  | 3.28814800  |
| H | 0.47961200  | 2.14991400  | 3.73477900  |
| H | 2.88744300  | 4.21378400  | -0.83935100 |
| H | 2.88633600  | 5.79898700  | 1.33747000  |
| H | 3.32500800  | 4.24947800  | 3.50742700  |
| H | 3.58628200  | 1.70136300  | 2.68762200  |
| C | -0.11467100 | 4.01039000  | -1.78959900 |
| H | -0.07851000 | 3.80375400  | -2.86499000 |



|   |             |             |             |
|---|-------------|-------------|-------------|
| H | -1.00522400 | 4.61190300  | -1.58394600 |
| H | 0.77468700  | 4.59427000  | -1.52921900 |
| H | 0.73699300  | 2.12562700  | -1.28996000 |
| C | -0.96300100 | 1.04068800  | -2.63620600 |
| H | -0.57491200 | 0.04398700  | -2.38322000 |
| H | -1.85681600 | 0.90886800  | -3.25028900 |
| H | -0.21430700 | 1.56699100  | -3.23777300 |
| H | -0.32897800 | 5.11146400  | 0.64669500  |
| P | 0.45497800  | 0.10132800  | 1.35499100  |
| P | 3.40545000  | 1.09208600  | -0.48064900 |
| C | 1.38210600  | -0.33945300 | 2.88878700  |
| C | 0.73599800  | -0.34842500 | 4.13517900  |
| C | 2.74025400  | -0.67707300 | 2.84689000  |
| C | 1.43220800  | -0.66888400 | 5.29671600  |
| H | -0.32383900 | -0.10562300 | 4.19863800  |
| C | 3.43943500  | -0.99894800 | 4.00827700  |
| H | 3.27419800  | -0.68153400 | 1.89847900  |
| C | 2.78639600  | -0.99521500 | 5.23765600  |
| H | 0.91119600  | -0.66608500 | 6.25185100  |
| H | 4.49571500  | -1.25424300 | 3.94311200  |
| H | 3.32754200  | -1.25032800 | 6.14630200  |
| C | 5.01396700  | 0.35689600  | 0.00434800  |
| C | 5.97382200  | 1.12713800  | 0.67725800  |
| C | 5.32083600  | -0.97010000 | -0.32607200 |
| C | 7.20516100  | 0.57434700  | 1.01975000  |
| H | 5.76205000  | 2.16057700  | 0.94361600  |
| C | 6.55340600  | -1.51719500 | 0.01665200  |
| H | 4.59253700  | -1.58094900 | -0.85723800 |
| C | 7.49625000  | -0.74831200 | 0.69577700  |
| H | 7.93617000  | 1.18342100  | 1.54689700  |

|    |             |             |             |
|----|-------------|-------------|-------------|
| H  | 6.77192000  | -2.55082300 | -0.24419300 |
| H  | 8.45569800  | -1.17975300 | 0.97294100  |
| C  | -1.21322300 | -0.51382700 | 1.81211000  |
| C  | -1.37145600 | -1.84907700 | 2.19962800  |
| C  | -2.32360300 | 0.33547900  | 1.84058200  |
| C  | -2.61496600 | -2.32240200 | 2.60653200  |
| H  | -0.50979700 | -2.51876800 | 2.20923000  |
| C  | -3.56949600 | -0.14236400 | 2.24182600  |
| H  | -2.22243400 | 1.38355800  | 1.56616100  |
| C  | -3.71941100 | -1.47177600 | 2.62741000  |
| H  | -2.72068900 | -3.36069300 | 2.91687100  |
| H  | -4.42396500 | 0.53392000  | 2.25177100  |
| H  | -4.69137400 | -1.84508500 | 2.94394400  |
| C  | 3.70200600  | 1.89327900  | -2.10025200 |
| C  | 2.85849800  | 1.65829400  | -3.19006300 |
| C  | 4.76918100  | 2.79088100  | -2.24323500 |
| C  | 3.05913100  | 2.32448300  | -4.39720300 |
| H  | 2.04736000  | 0.93566000  | -3.10250600 |
| C  | 4.97916300  | 3.44177400  | -3.45380600 |
| H  | 5.43577500  | 2.98580000  | -1.40312000 |
| C  | 4.11975500  | 3.21613000  | -4.52961900 |
| H  | 2.38872500  | 2.13735400  | -5.23339900 |
| H  | 5.81461700  | 4.13077400  | -3.55608500 |
| H  | 4.28242100  | 3.73326100  | -5.47272600 |
| Rh | 1.76048700  | -0.47984300 | -0.65681600 |
| H  | 2.78645400  | -0.76269000 | -1.84369900 |
| H  | 2.70199900  | -1.33921300 | 0.17829500  |
| C  | -0.58809400 | -3.89395000 | -0.31794800 |
| C  | 0.79686000  | -3.91995500 | -0.09537300 |
| C  | 0.75162400  | -2.34867500 | -1.88807200 |

|   |             |             |             |
|---|-------------|-------------|-------------|
| C | 1.54908900  | -3.25300500 | -1.18367400 |
| H | 0.96411100  | -2.04599000 | -2.91061200 |
| C | 2.88446100  | -3.66302600 | -1.62191900 |
| C | 3.57463000  | -4.72556100 | -1.00837800 |
| C | 3.48318800  | -3.06175900 | -2.75077700 |
| C | 4.82534700  | -5.12745800 | -1.46341900 |
| H | 3.12274200  | -5.28332900 | -0.19753600 |
| C | 4.72759700  | -3.46523400 | -3.20419700 |
| H | 2.97425300  | -2.25753500 | -3.27523800 |
| C | 5.41385700  | -4.49288600 | -2.55250700 |
| H | 5.33263900  | -5.95153100 | -0.96796000 |
| H | 5.16579700  | -2.97732500 | -4.07135800 |
| H | 6.39376800  | -4.80559100 | -2.90618000 |
| S | -0.96205900 | -2.77402600 | -1.64097000 |
| O | -1.44194900 | -3.43808300 | -2.85813400 |
| O | -1.78790600 | -1.68451700 | -1.09323800 |
| C | -7.27615600 | -0.15674400 | -0.41162100 |
| H | -8.29969200 | -0.42583500 | -0.16164600 |
| C | -4.94055900 | -0.74812200 | -0.61046400 |
| H | -4.14091700 | -1.47858500 | -0.50969000 |
| C | -5.65792300 | 1.49661100  | -1.14871100 |
| H | -5.43693700 | 2.50025300  | -1.49119500 |
| C | -1.50636900 | -4.54107400 | 0.48690900  |
| H | -2.57306200 | -4.48966500 | 0.27736800  |
| C | -1.01561000 | -5.23939100 | 1.59162600  |
| H | -1.70200700 | -5.78519800 | 2.23427500  |
| C | 0.34247500  | -5.18837100 | 1.90491200  |
| H | 0.70344500  | -5.66920200 | 2.81035900  |
| C | 1.25227100  | -4.52607500 | 1.08012900  |
| H | 2.29429600  | -4.45918700 | 1.37884700  |

## 7. Reference

- (1) Kuhn, M.; Falk, F. C.; Paradies, J. *Org. Lett.* **2011**, *13*, 4100.
- (2) Tosatti, P.; Pfaltz, A. *Angew. Chem. Int. Ed.* **2017**, *56*, 4579.
- (3) Antonow, D.; Marrafa, T.; Dawood, I.; Ahmed, T.; Haque, M. R.; Thurston, D. E.; Zinzalla, G. *Chem. Commun.*, **2010**, *46*, 2289.
- (4) Xiong, R.; Patel, H. K.; Gutgesell, L. M.; Zhao, J.; Delgado-Rivera, L.; Pham, T. N. D.; Zhao, H.; Carlson, K.; Martin, T.; Katzenellenbogen, J. A.; Moore, T. W.; Tonetti, D. A.; Thatcher, G. R. J. *J. Med. Chem.* **2016**, *59*, 219.
- (5) Kim, S.; Yang, J.; Dinunno, F. *Tetrahedron Lett.* **1999**, *40*, 2909.
- (6) Urban, S.; Beiring, B.; Ortega, N.; Paul, D.; Glorius, F. *J. Am. Chem. Soc.* **2012**, *134*, 15241.
- (7) Cabiddu, S.; Cancellu, D.; Floris, G.; Gelli, G.; Melis, S. *Synthesis* **1988**, 888.
- (8) Milner, P. J.; Yang, Y.; Buchwald, S. L. *Organometallics* **2015**, *34*, 4775.
- (9) Masuya, Y.; Tobisu, M.; Chatani, N. *Org. Lett.* **2016**, *18*, 4312.
- (10) Fredrich, S.; A.; Bonasera, V.; Valderrey, Hecht, S. *J. Am. Chem. Soc.* **2018**, *140*, 6432.
- (11) Jeong, Y.-C.; Park, D. G.; Kim, E.; Yang, S. I.; Ahn, K.-H. *Macromolecules* **2006**, *39*, 3106.
- (12) Zhao, Y.; Truhlar, D. G. *J. Chem. Phys.*, **2006**, *125*, 194101.
- (13) Gaussian 09, Revision D.01, Frisch, M. J.; Trucks, G. W.; Schlegel, H. B.; Scuseria, G. E.; Robb, M. A.; Cheeseman, J. R.; Scalmani, G.; Barone, V.; Mennucci, B.; Petersson, G. A.; Nakatsuji, H.; Caricato, M.; Li, X.; Hratchian, H. P.; Izmaylov, A. F.; Bloino, J.; Zheng, G.; Sonnenberg, J. L.; Hada, M.; Ehara, M.; Toyota, K.; Fukuda, R.; Hasegawa, J.; Ishida, M.; Nakajima, T.; Honda, Y.; Kitao, O.; Nakai, H.; Vreven, T.; Montgomery, J. A.; Peralta, Jr., J. E.; Ogliaro, F.; Bearpark, M.; Heyd, J. J.; Brothers, E.; Kudin, K. N.; Staroverov, V. N.; Keith, T.; Kobayashi, R.; Normand, J.; Raghavachari, K.; Rendell, A.; Burant, J. C.; Iyengar, S. S.; Tomasi, J.; Cossi, M.; Rega, N.; Millam, J. M.; Klene, M.; Knox, J. E.; Cross, J. B.; Bakken, V.; Adamo, C.; Jaramillo, J.; Gomperts, R.; Stratmann, R. E.; Yazyev, O.; Austin, A. J.; Cammi, R.; Pomelli, C.; Ochterski, J. W.; Martin, R. L.;

Morokuma, K.; Zakrzewski, V. G.; Voth, G. A.; Salvador, P.; Dannenberg, J. J.; Dapprich, S.; Daniels, A. D.; Farkas, O.; Foresman, J. B.; Ortiz, J. V.; Cioslowski, J.; Fox, D. J.; Gaussian, Inc., Wallingford CT, 2013.

(14) Grimme, S.; Antony, J.; Ehrlich, S.; Krieg, H. *J. Chem. Phys.* **2010**, *132*, 154104.

(15) Marenich, A. V.; Cramer, C. J.; Truhlar, D. G. *J. Phys. Chem. B* **2009**, *113*, 6378.

## 8. NMR spectra

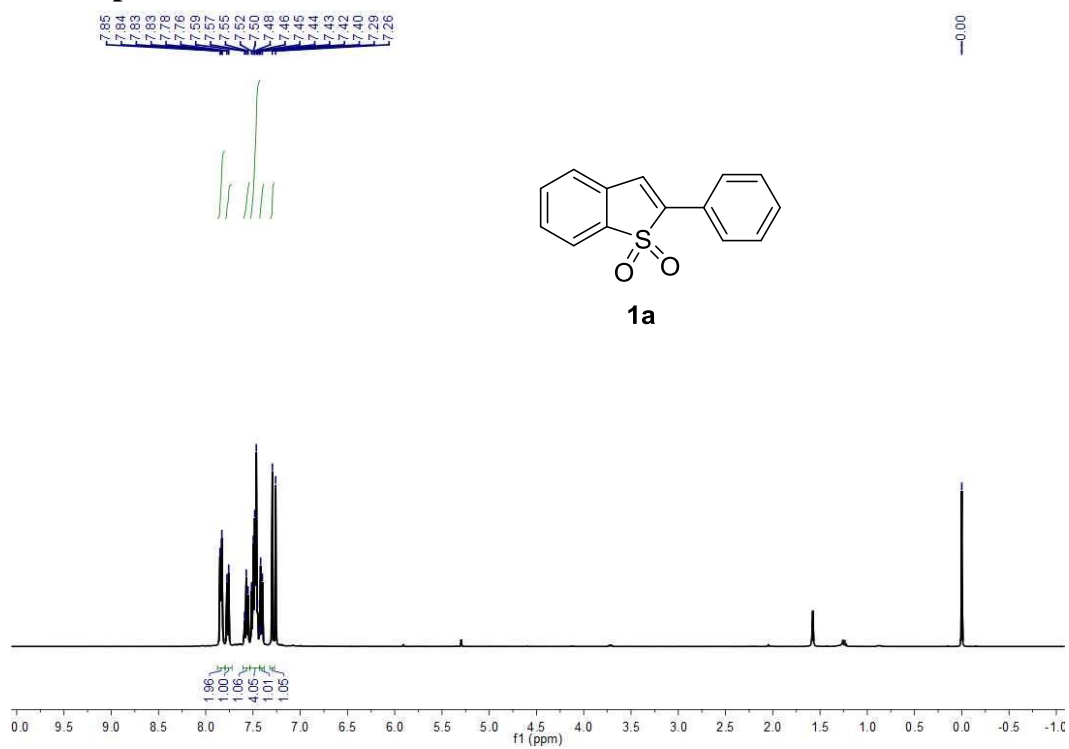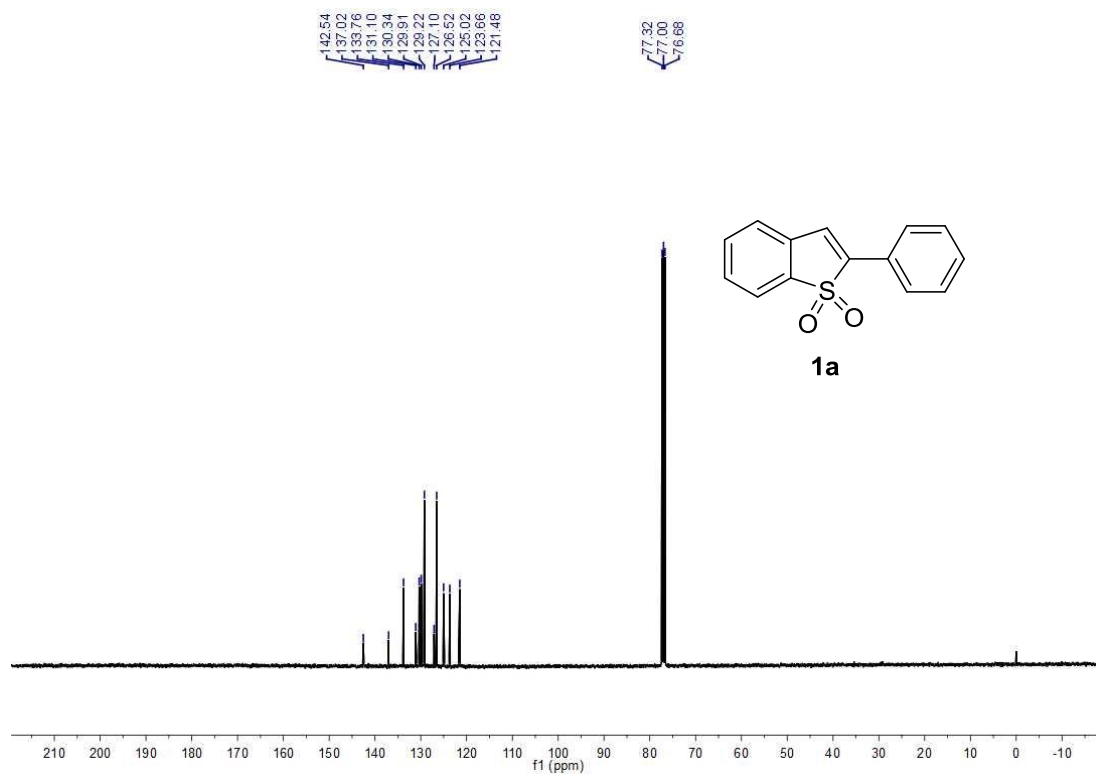

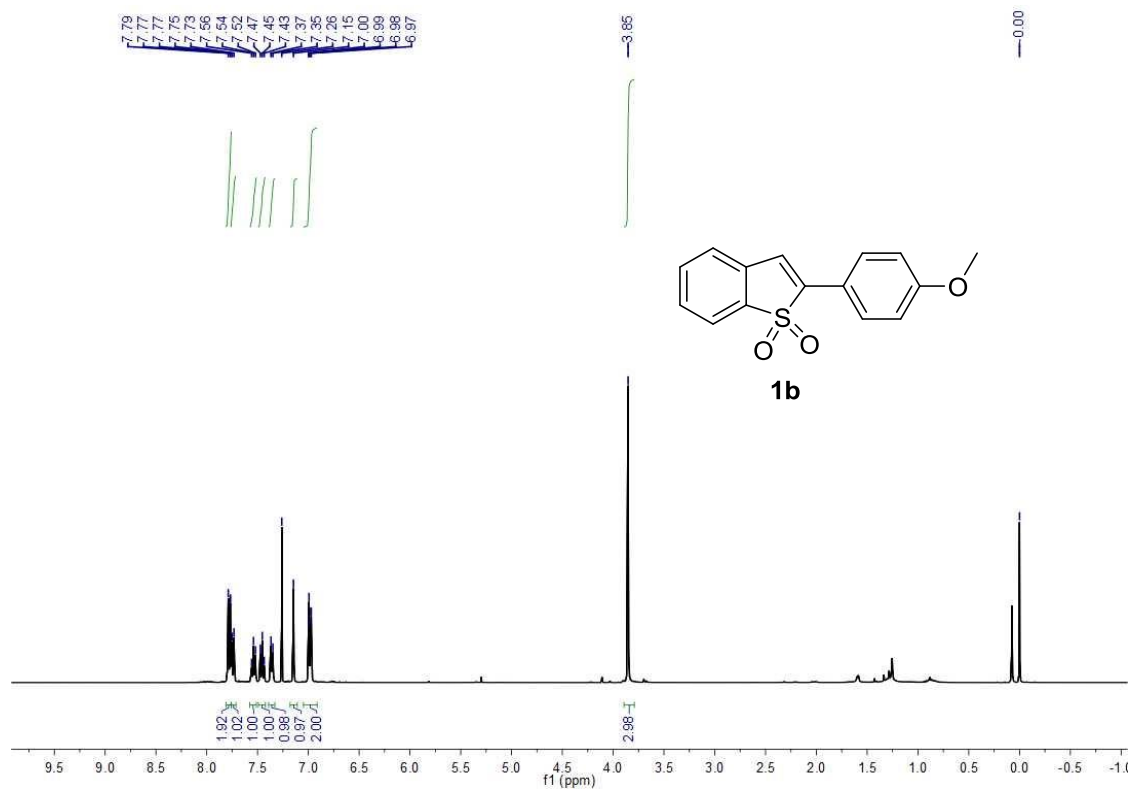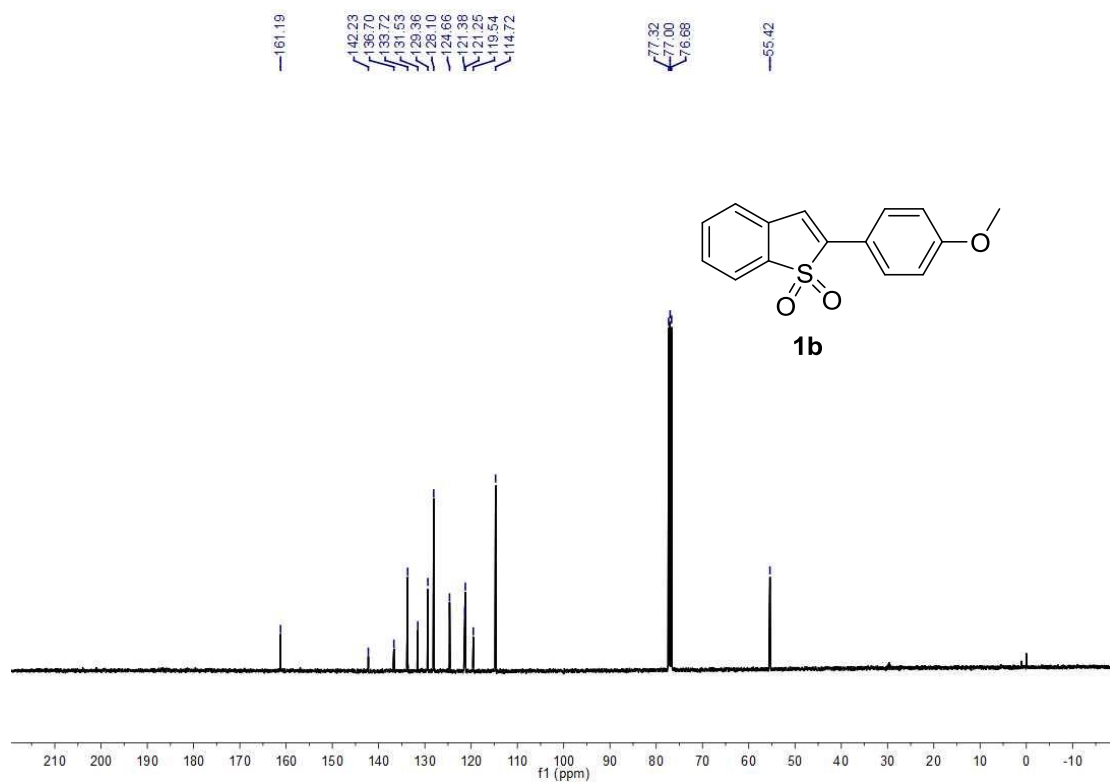

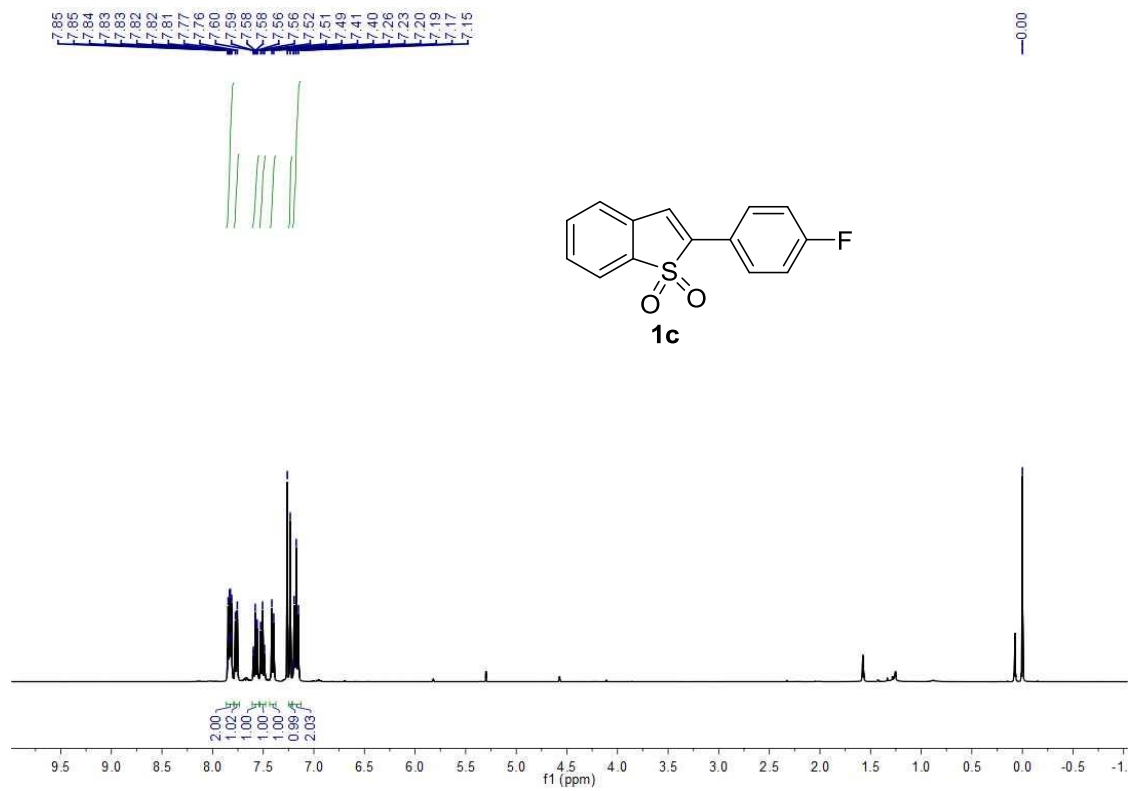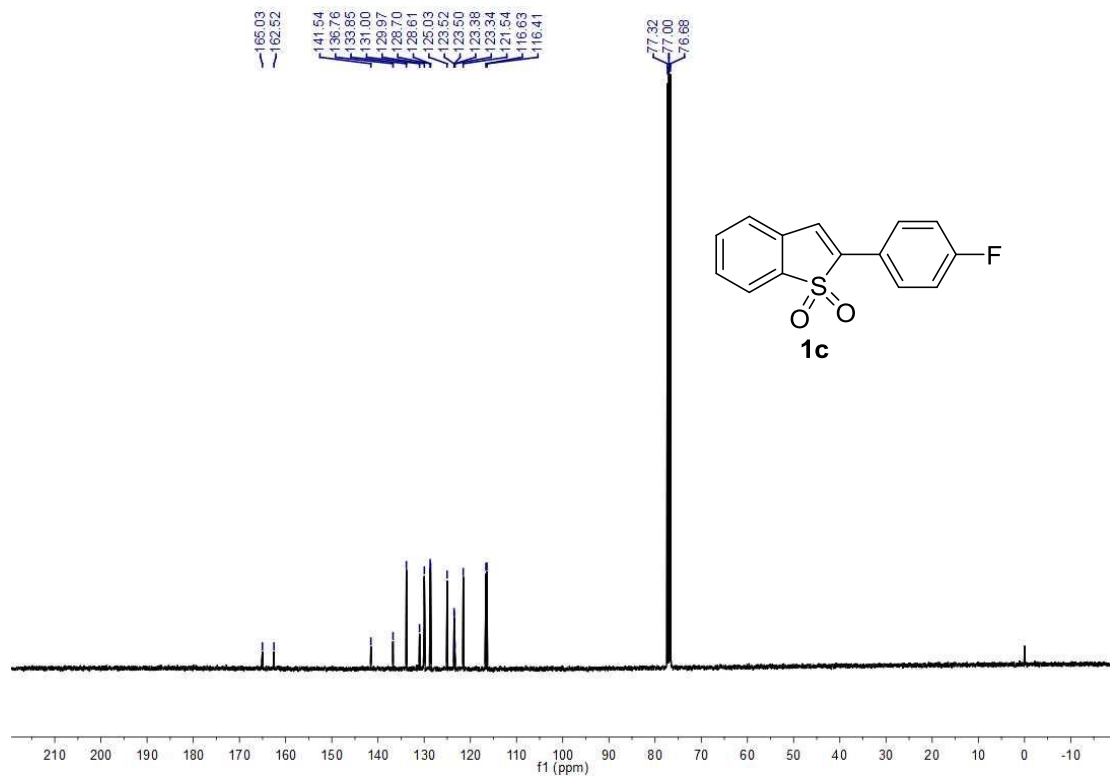



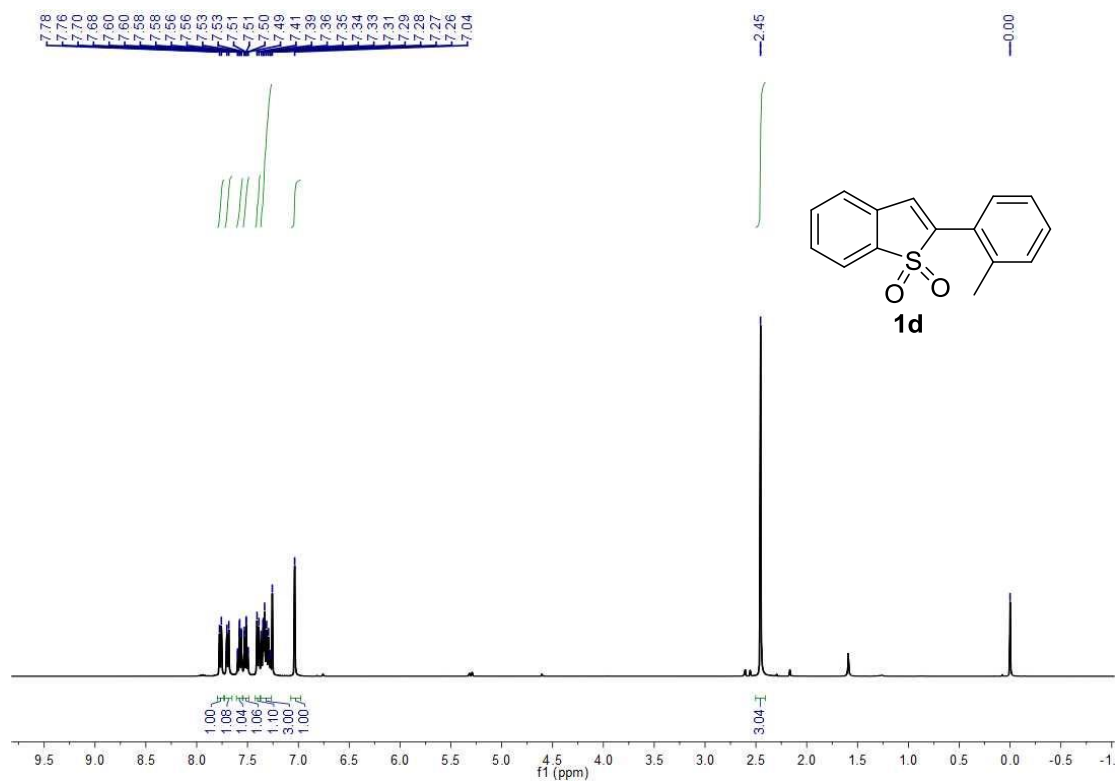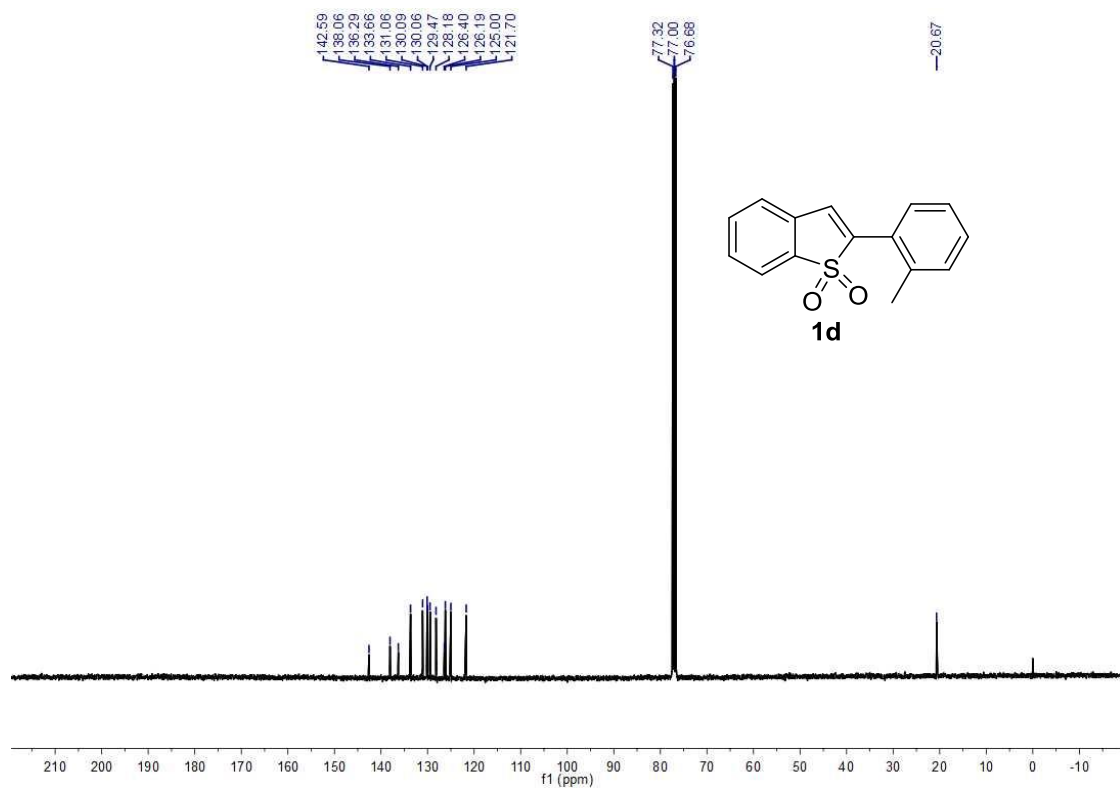

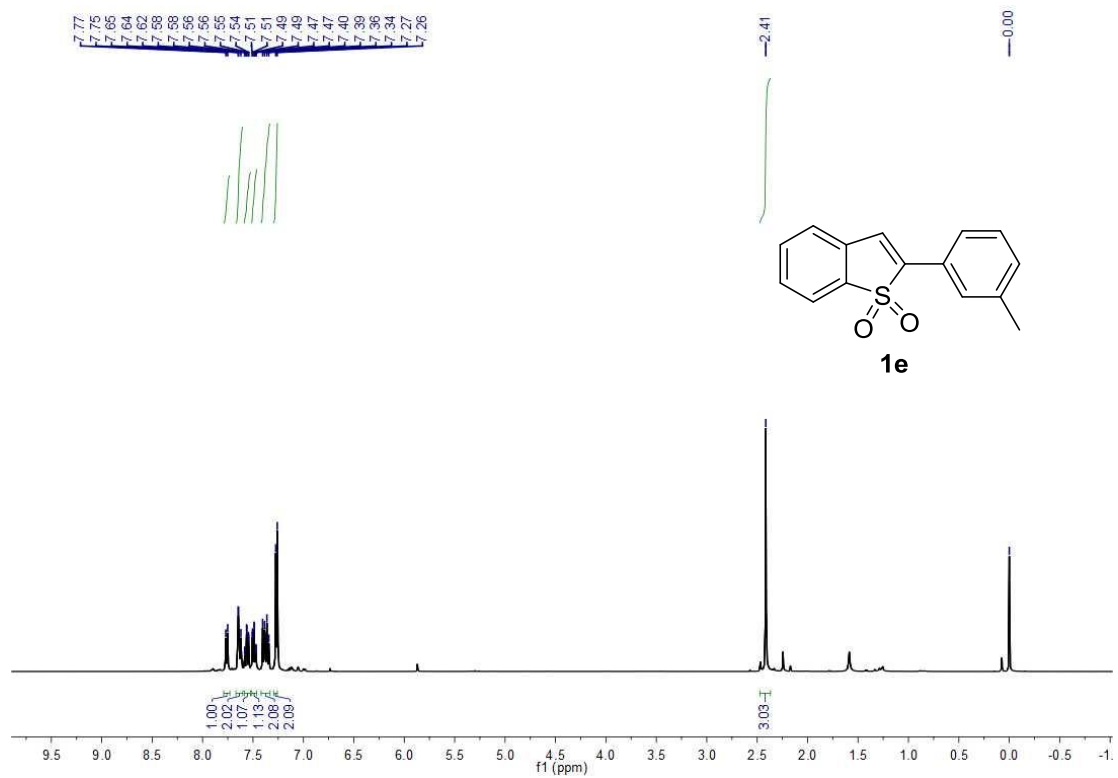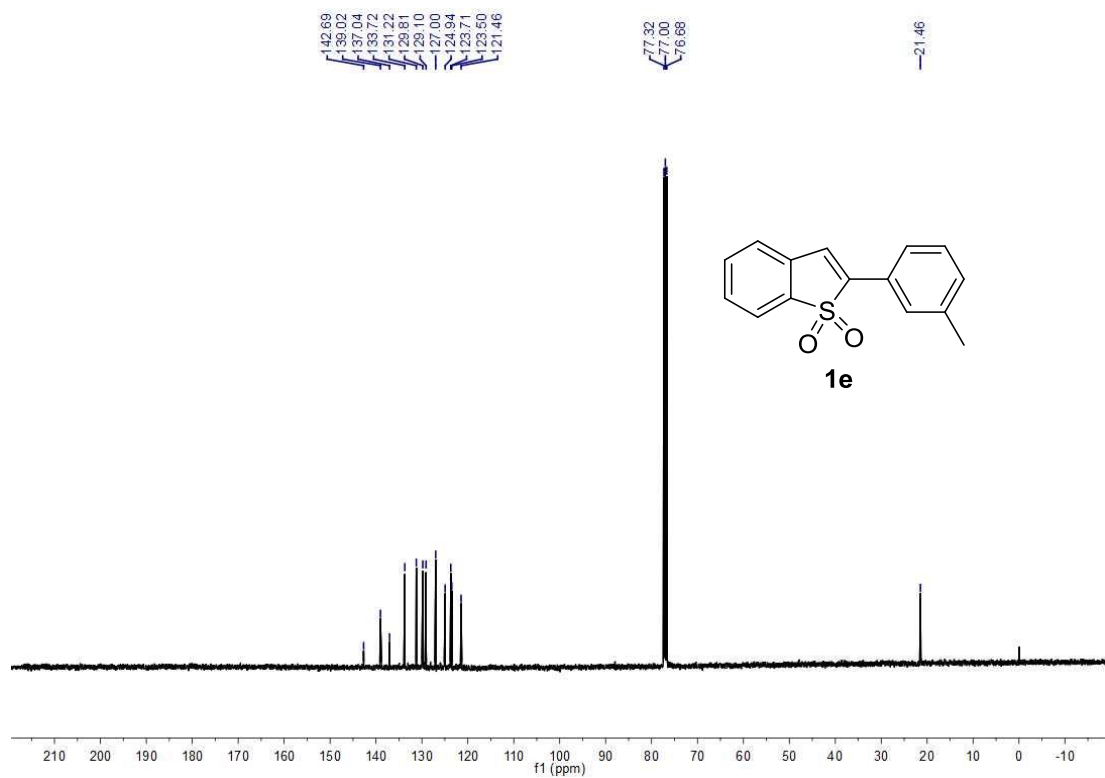

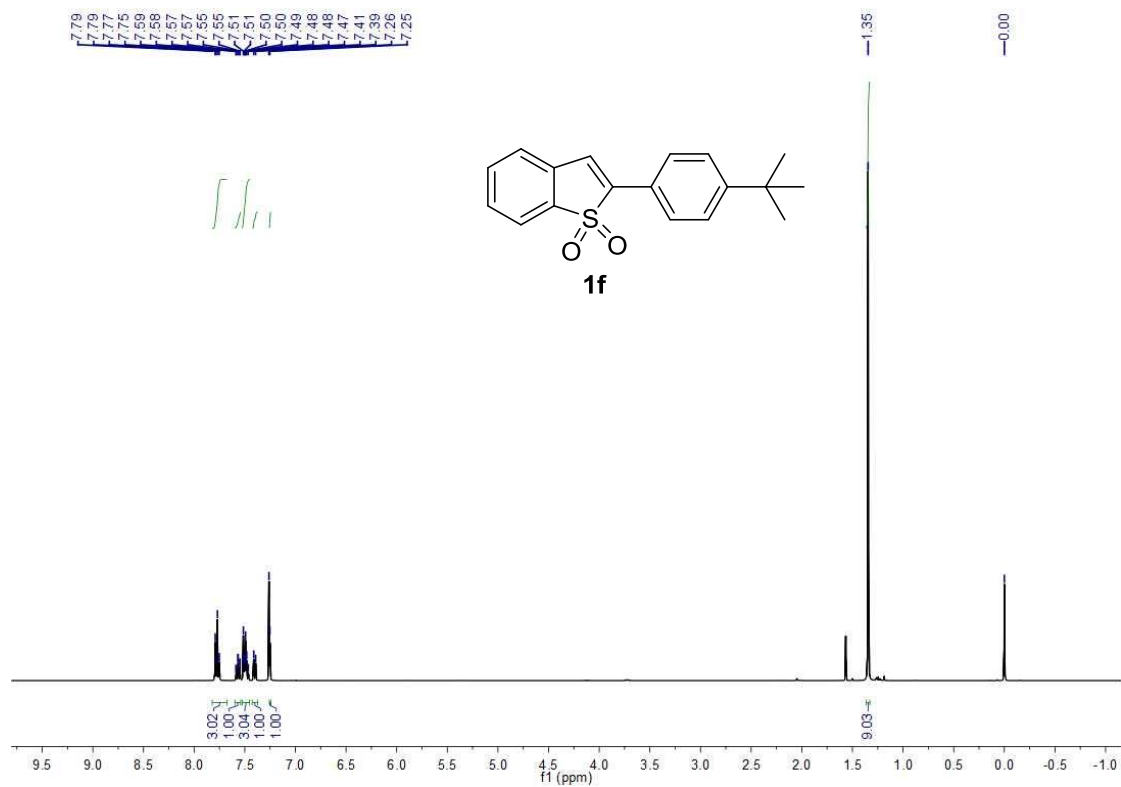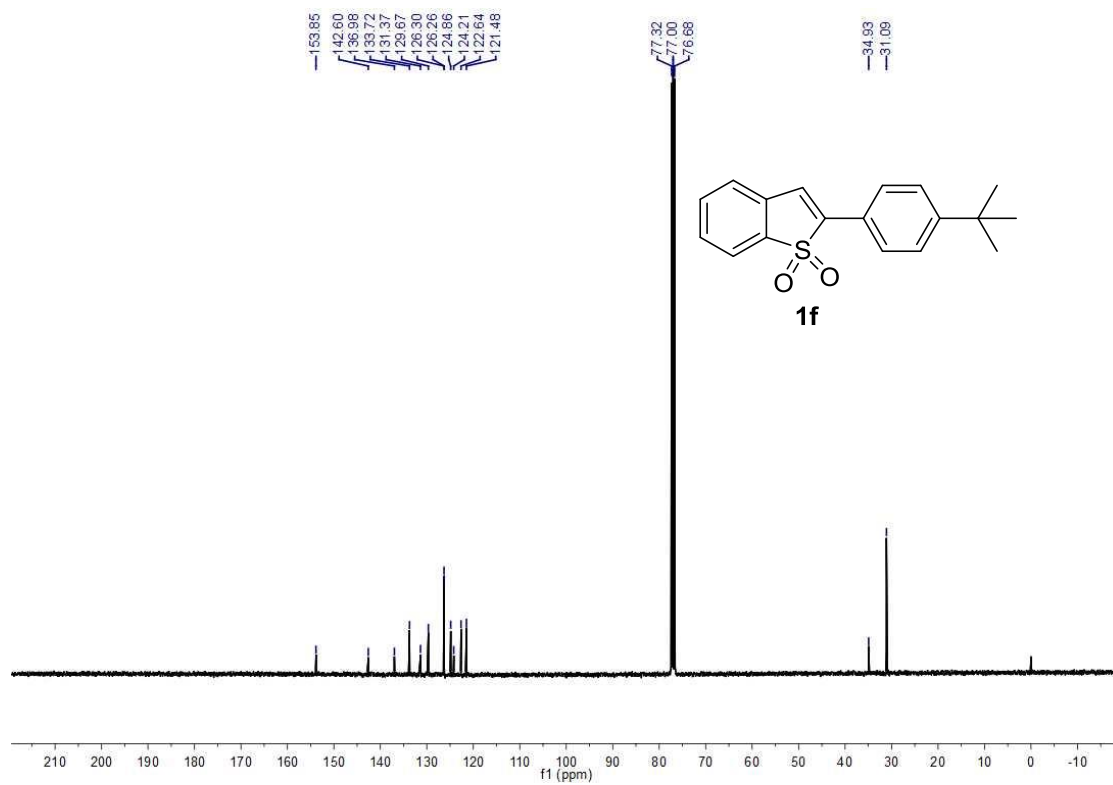

7.78  
7.77  
7.76  
7.75  
7.74  
7.73  
7.61  
7.59  
7.57  
7.55  
7.54  
7.53  
7.51  
7.44  
7.43  
7.42  
7.42  
7.32  
7.26

-0.00

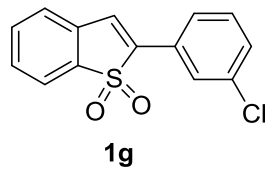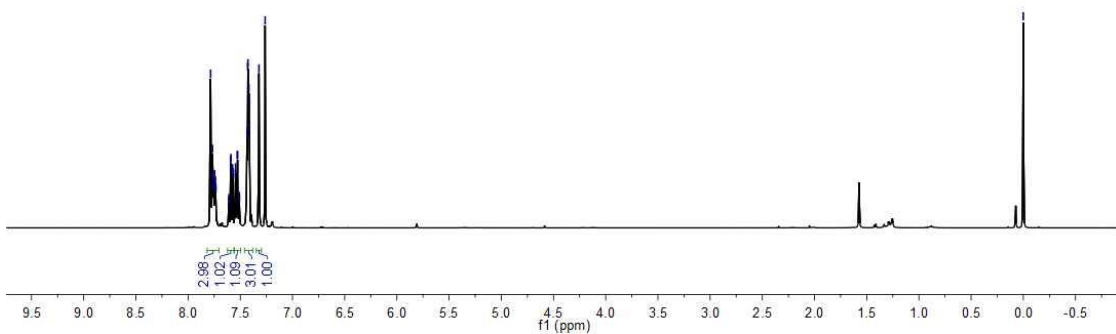

141.24  
136.97  
135.24  
133.89  
130.70  
130.49  
130.37  
130.33  
128.80  
126.46  
125.30  
124.99  
124.66  
121.59

77.32  
77.00  
76.68

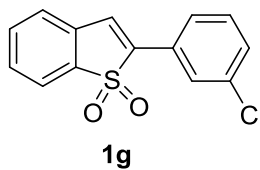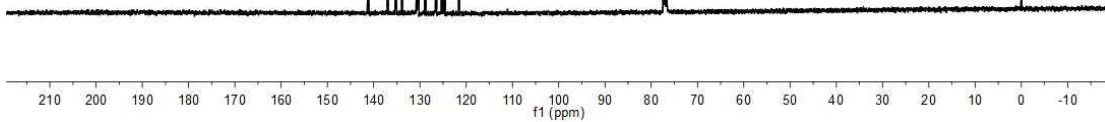

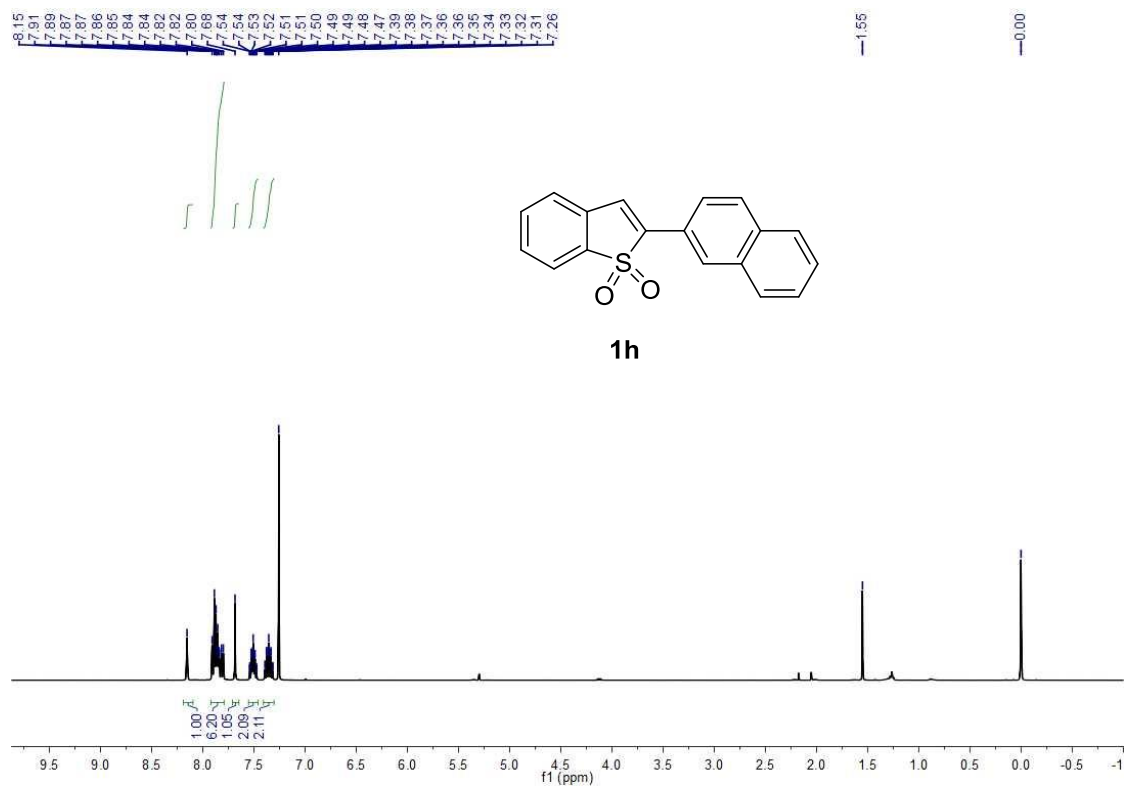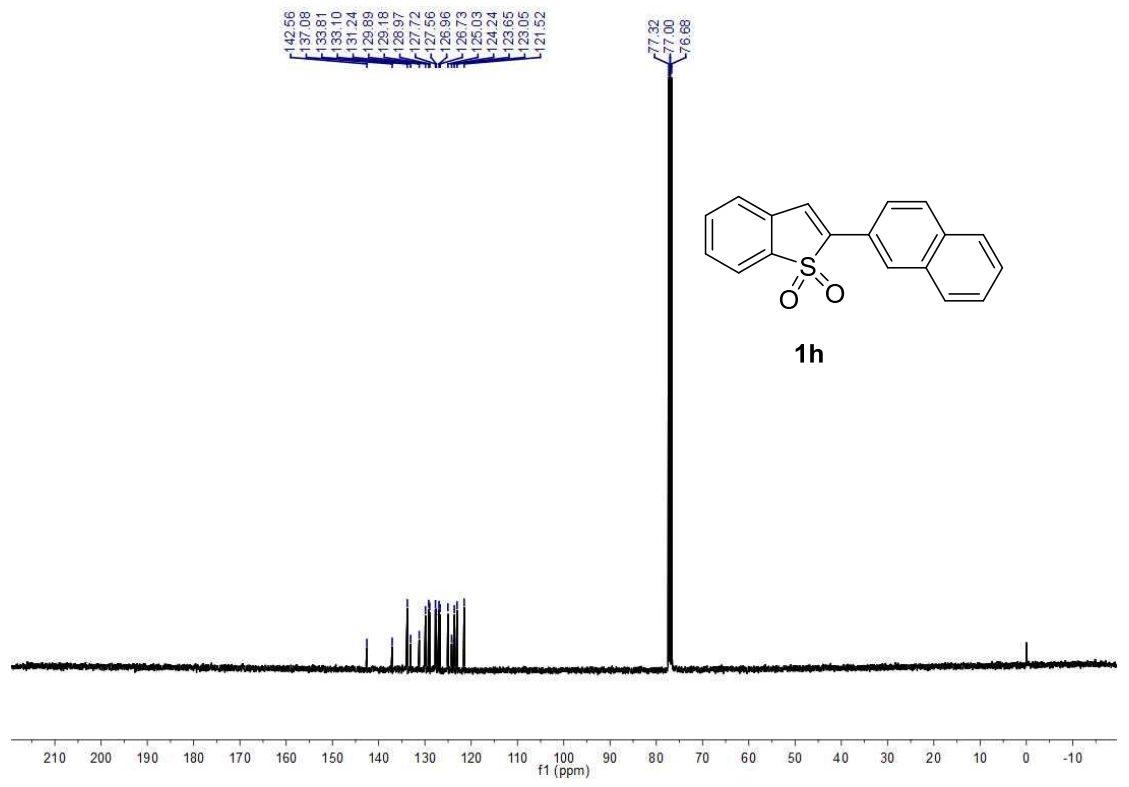

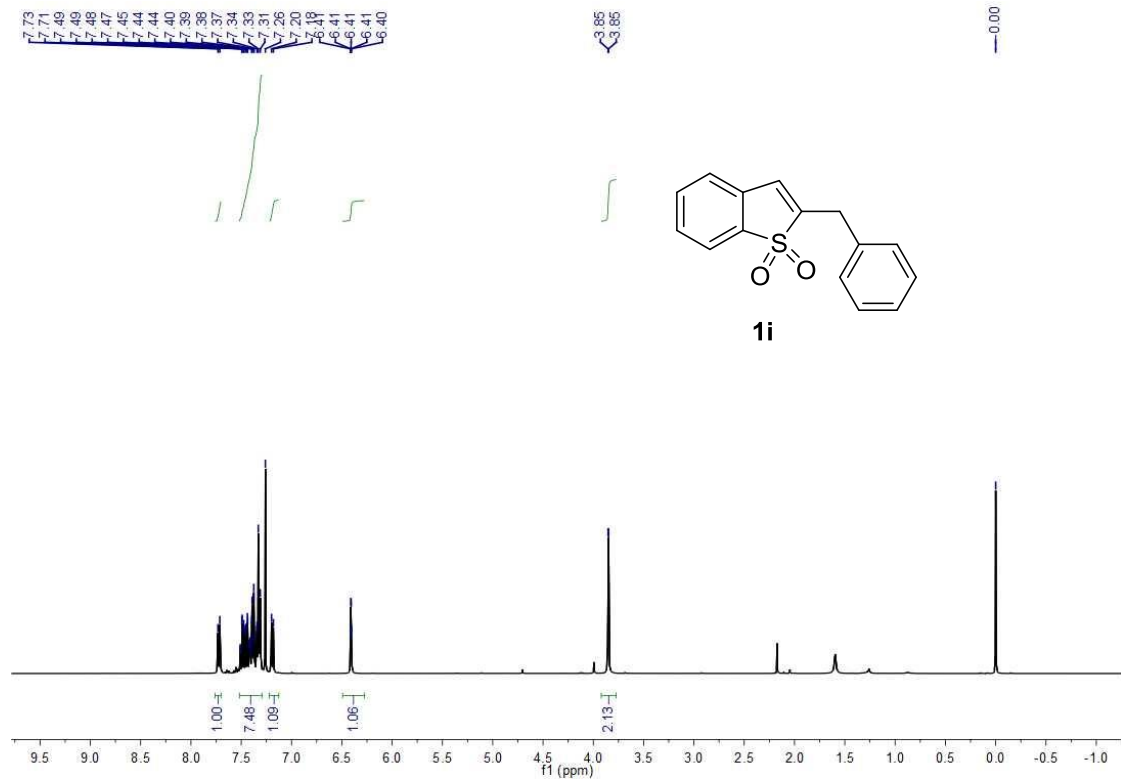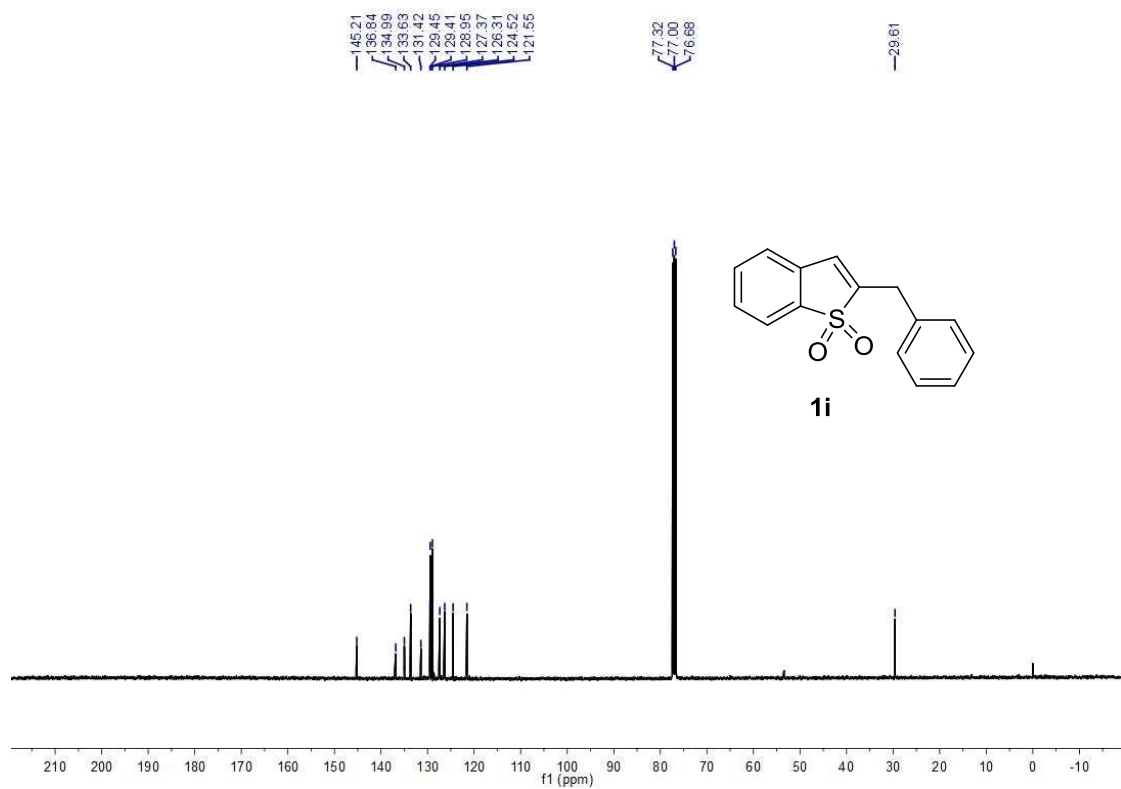

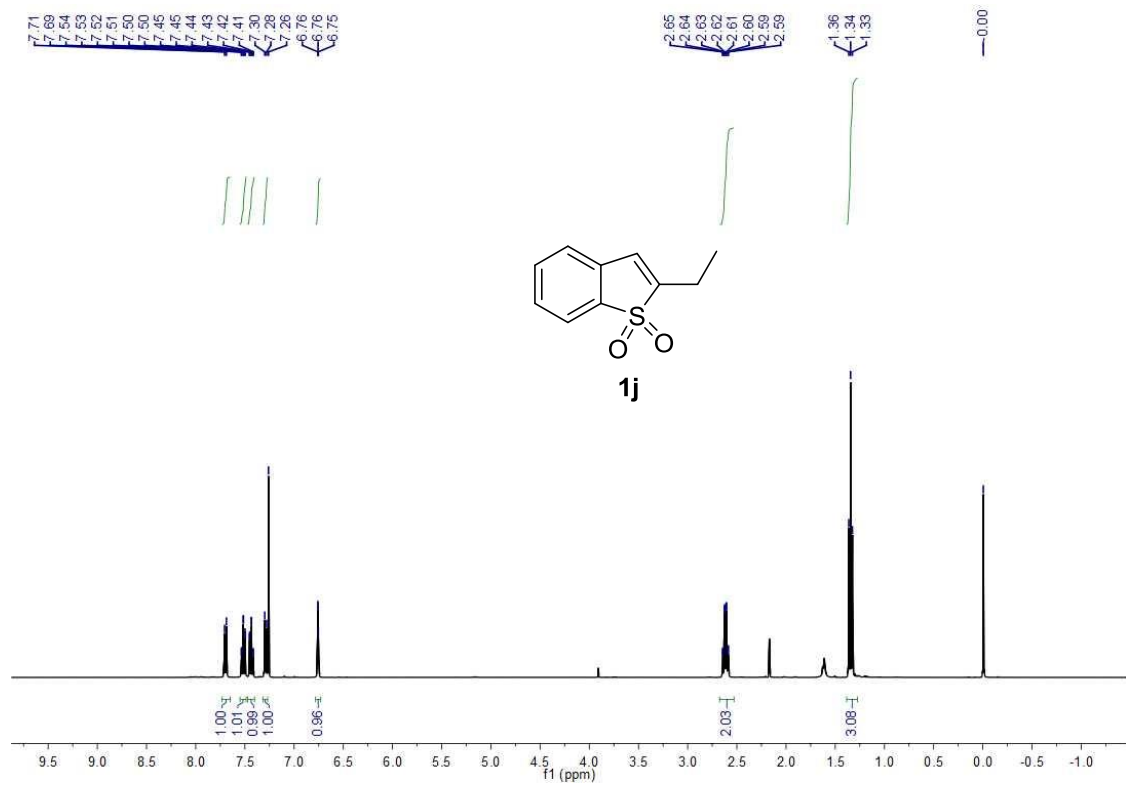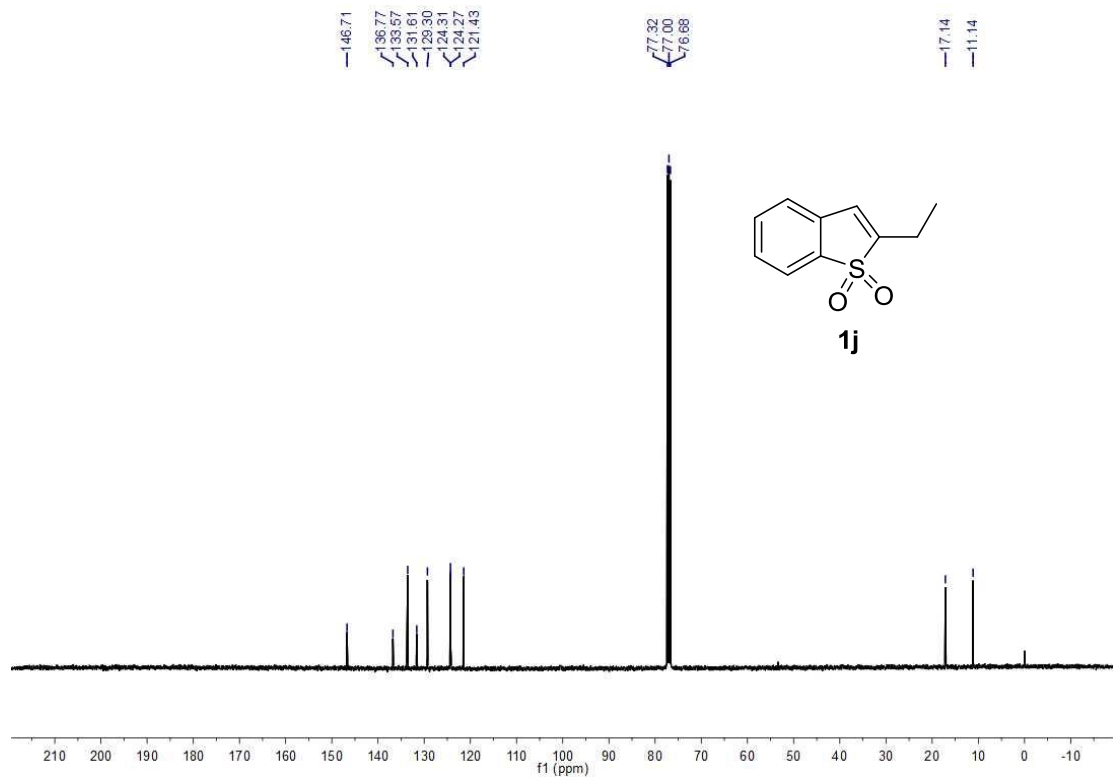

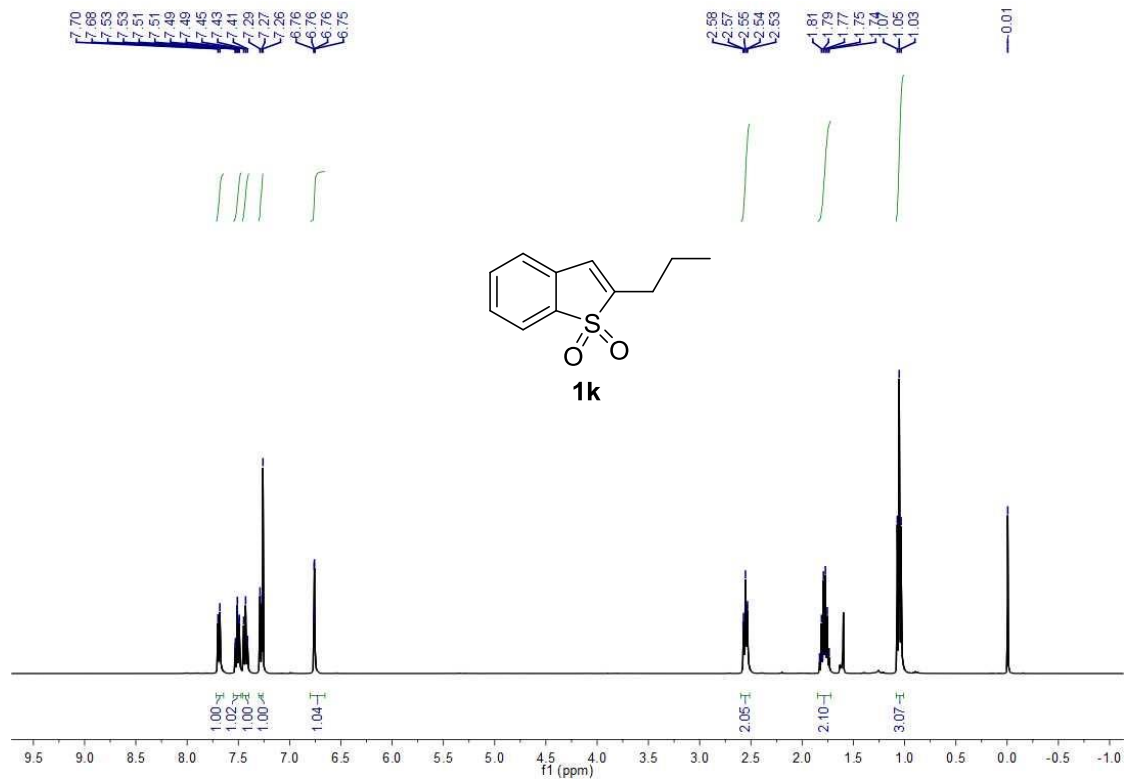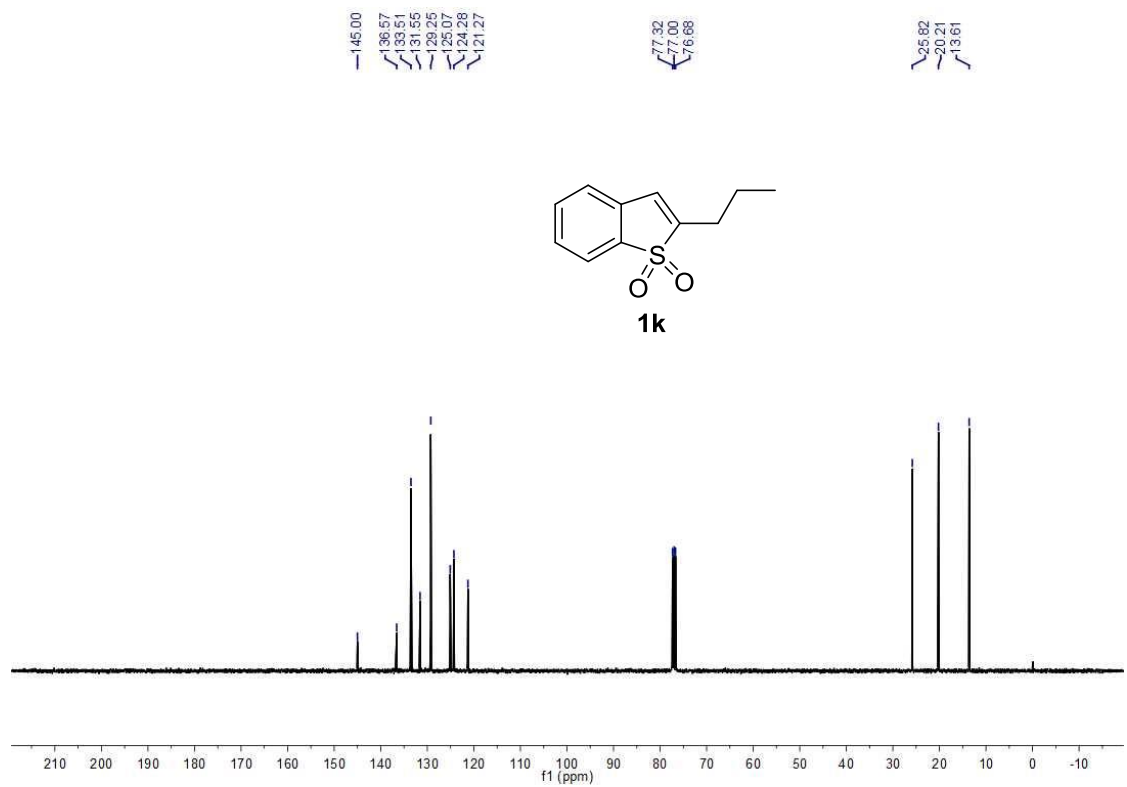



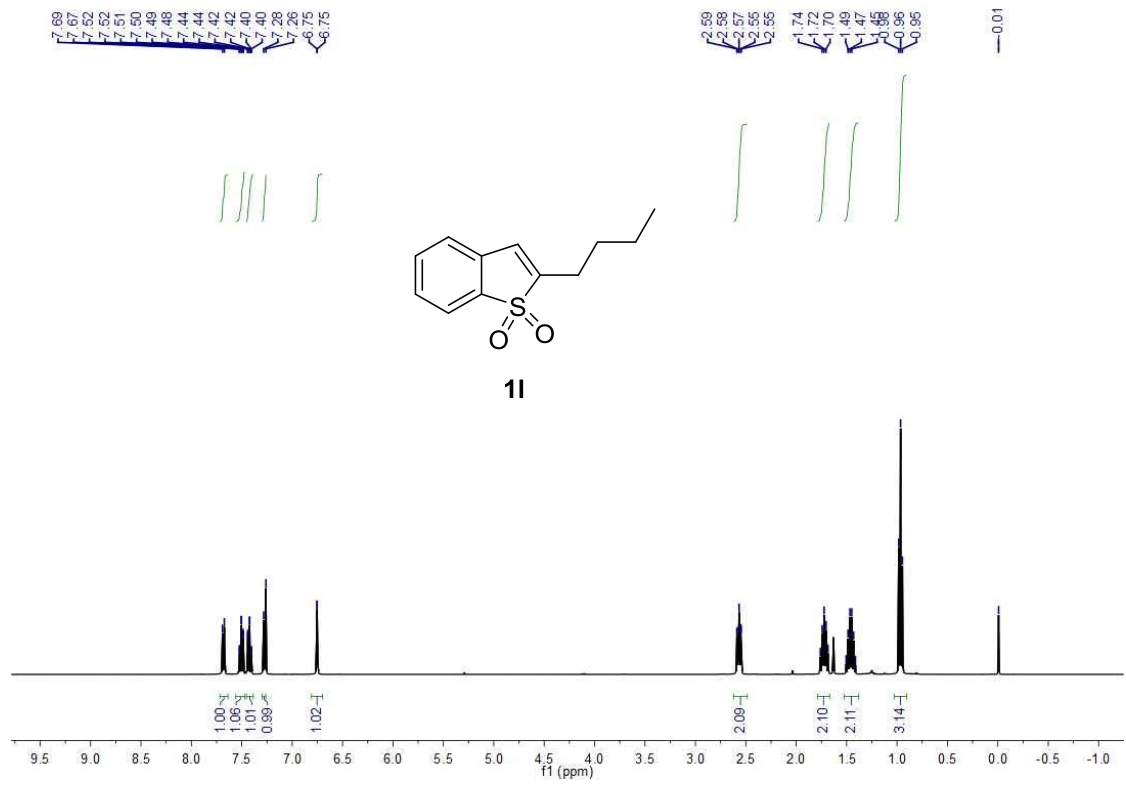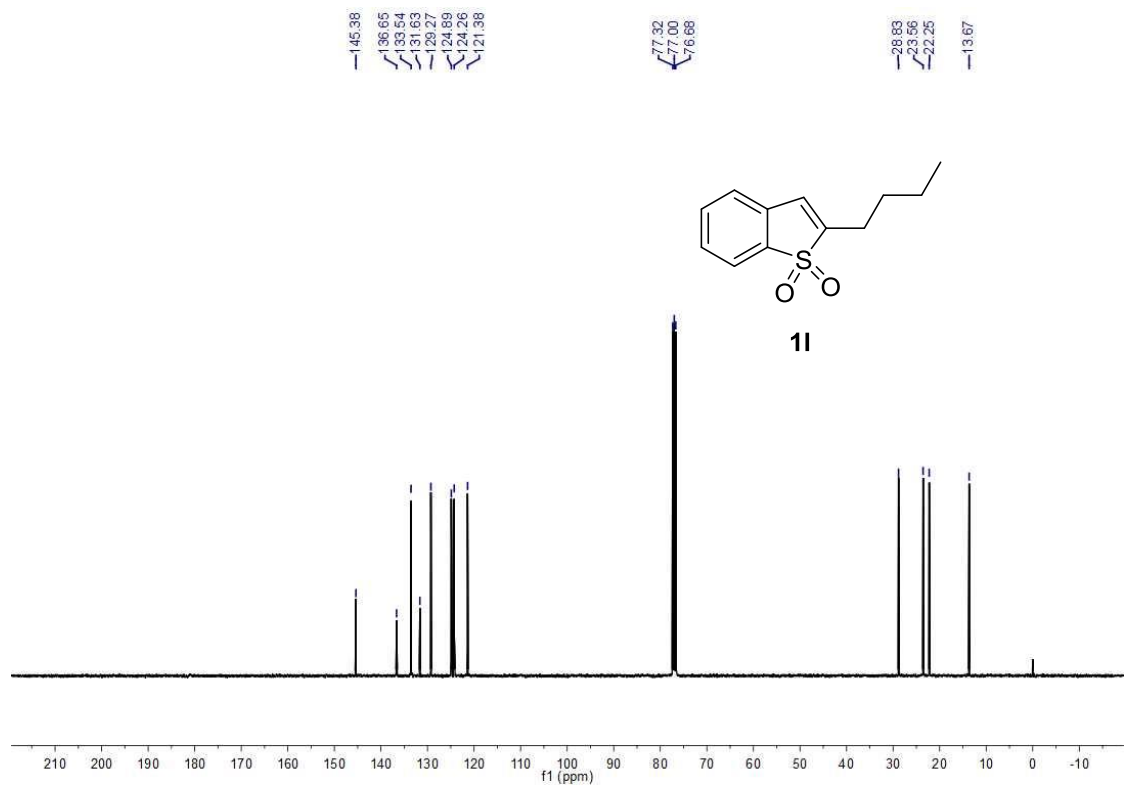

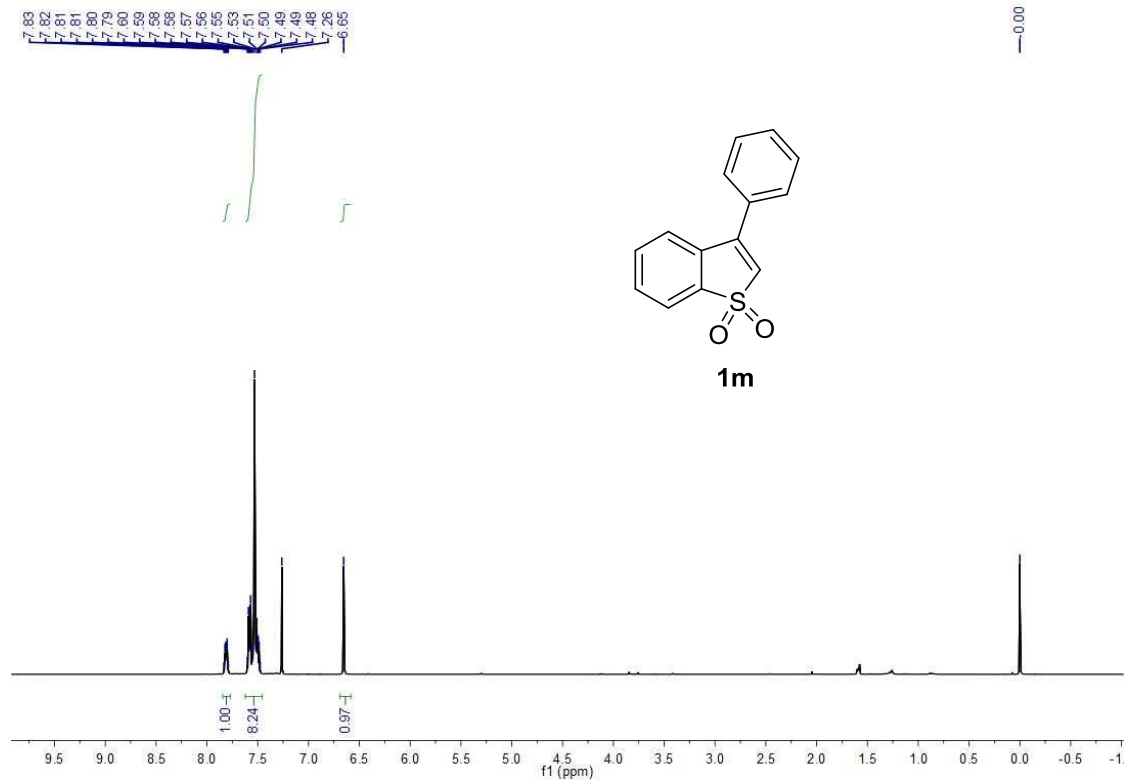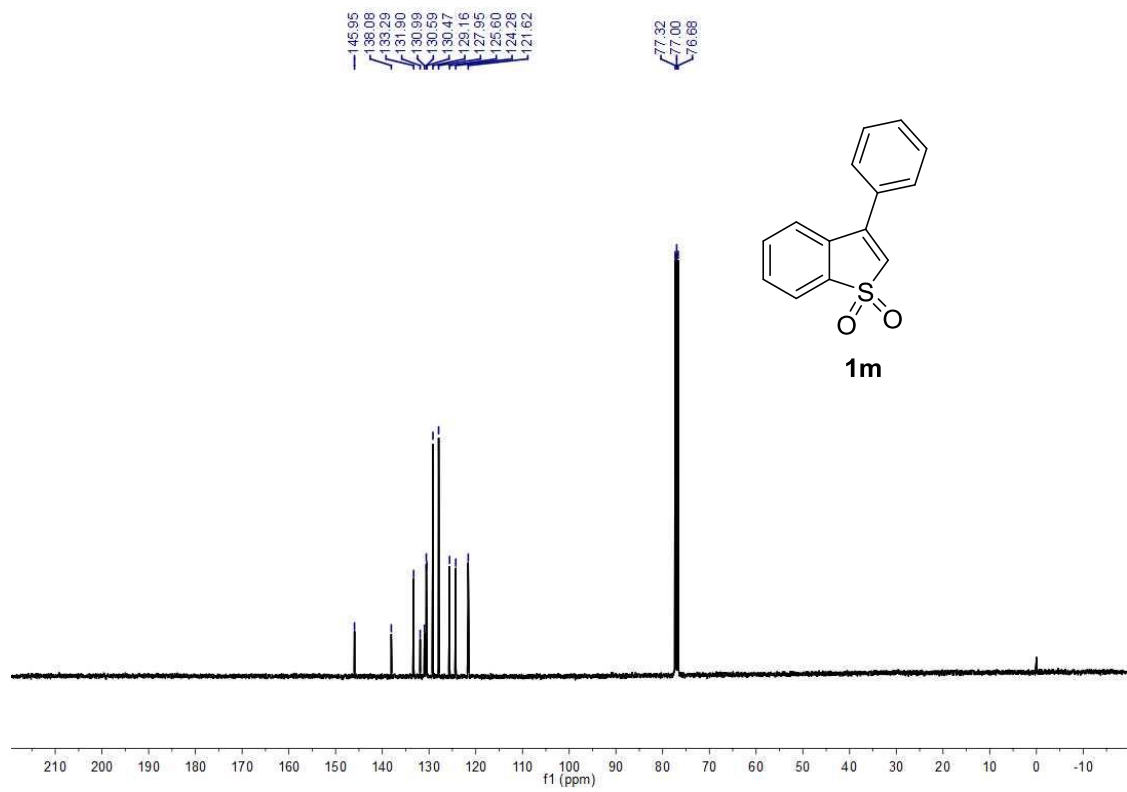

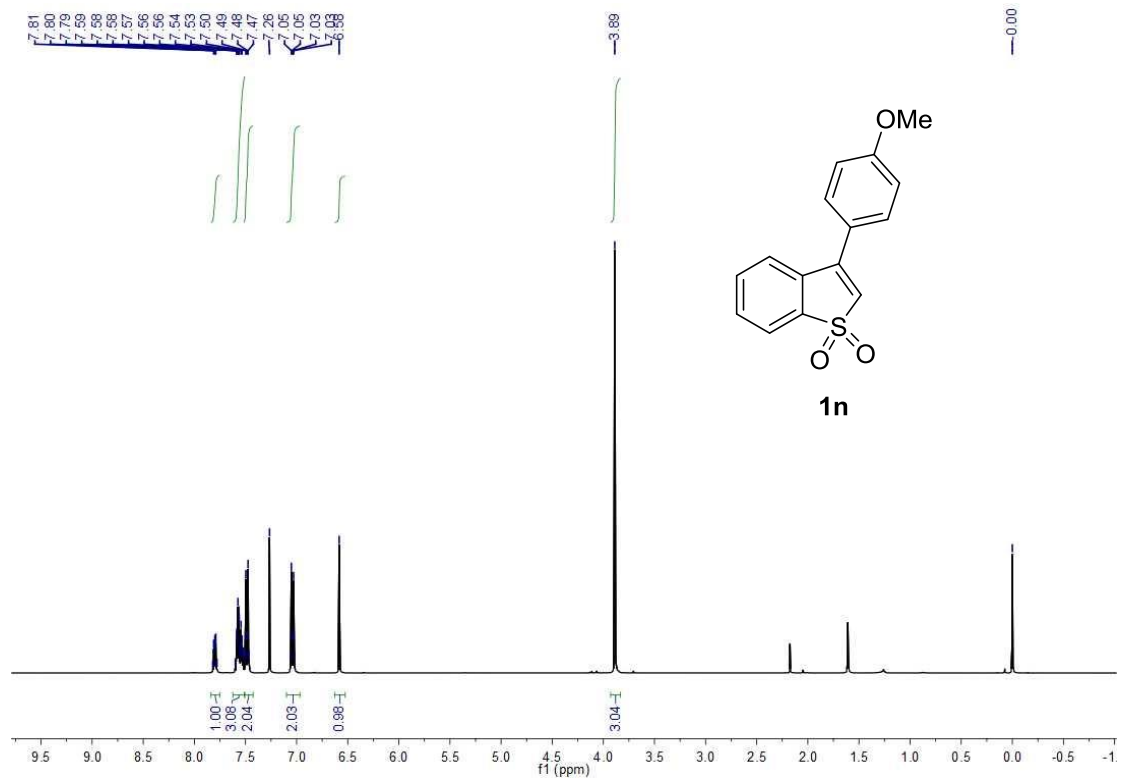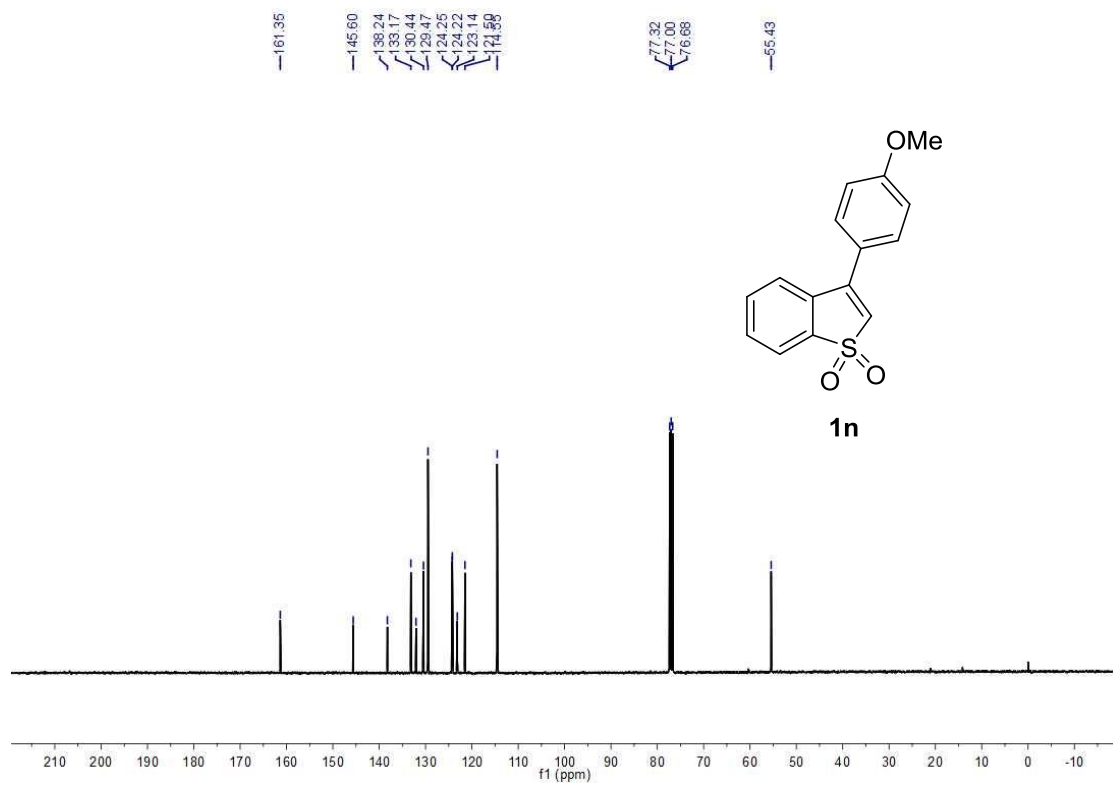

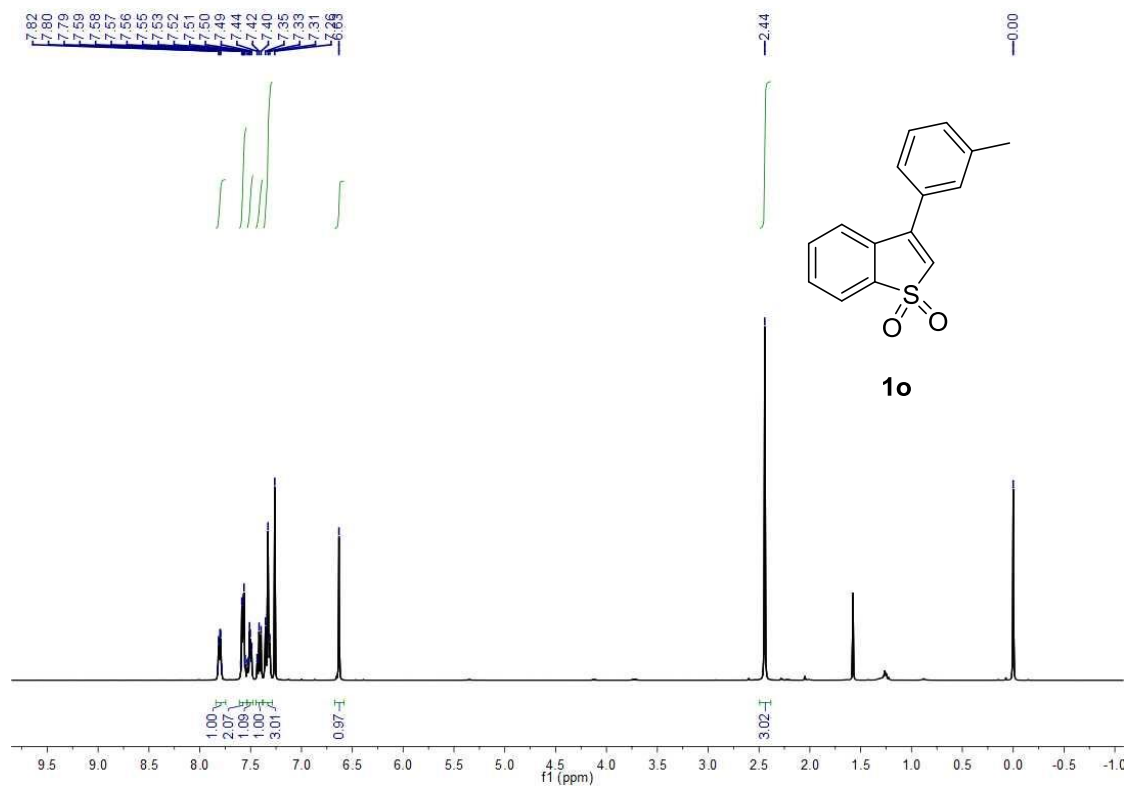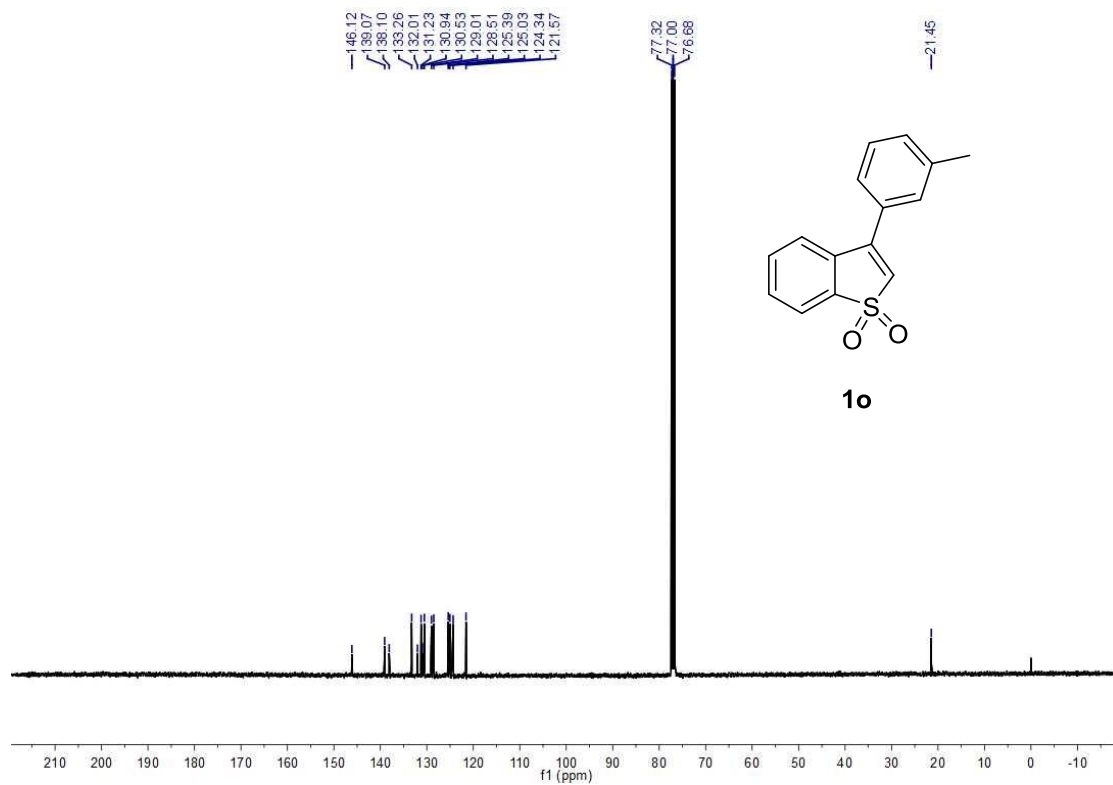

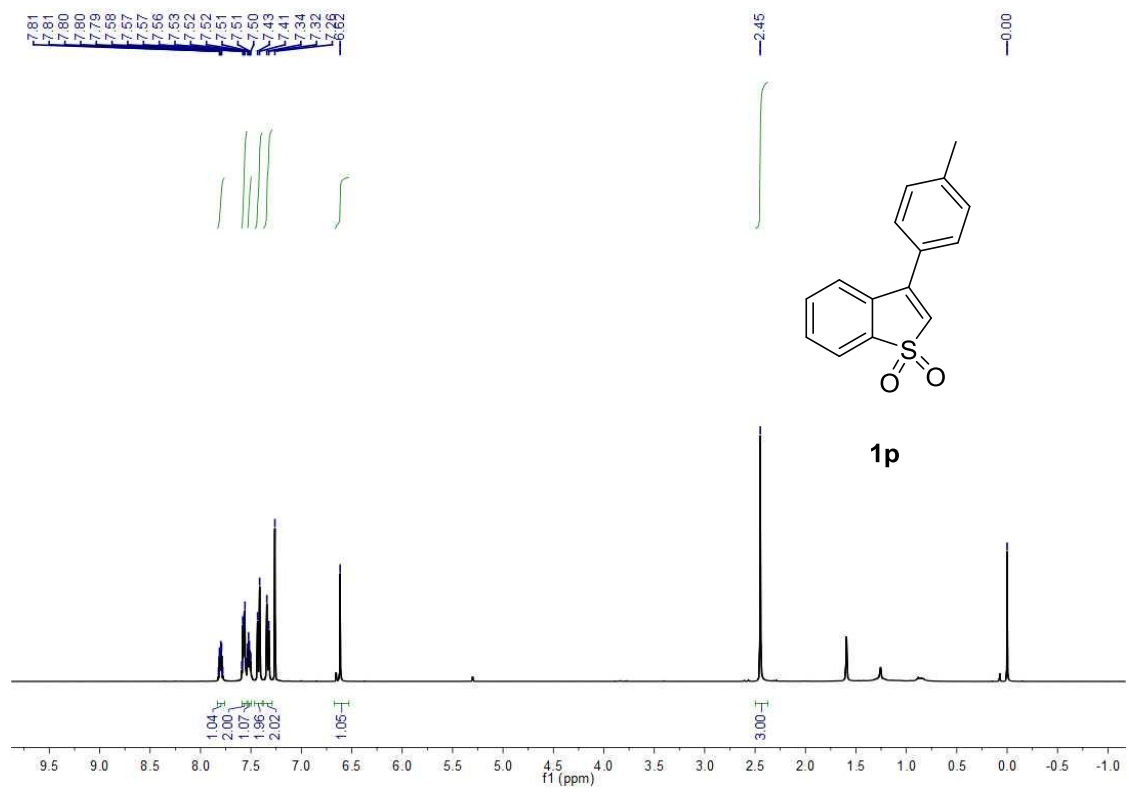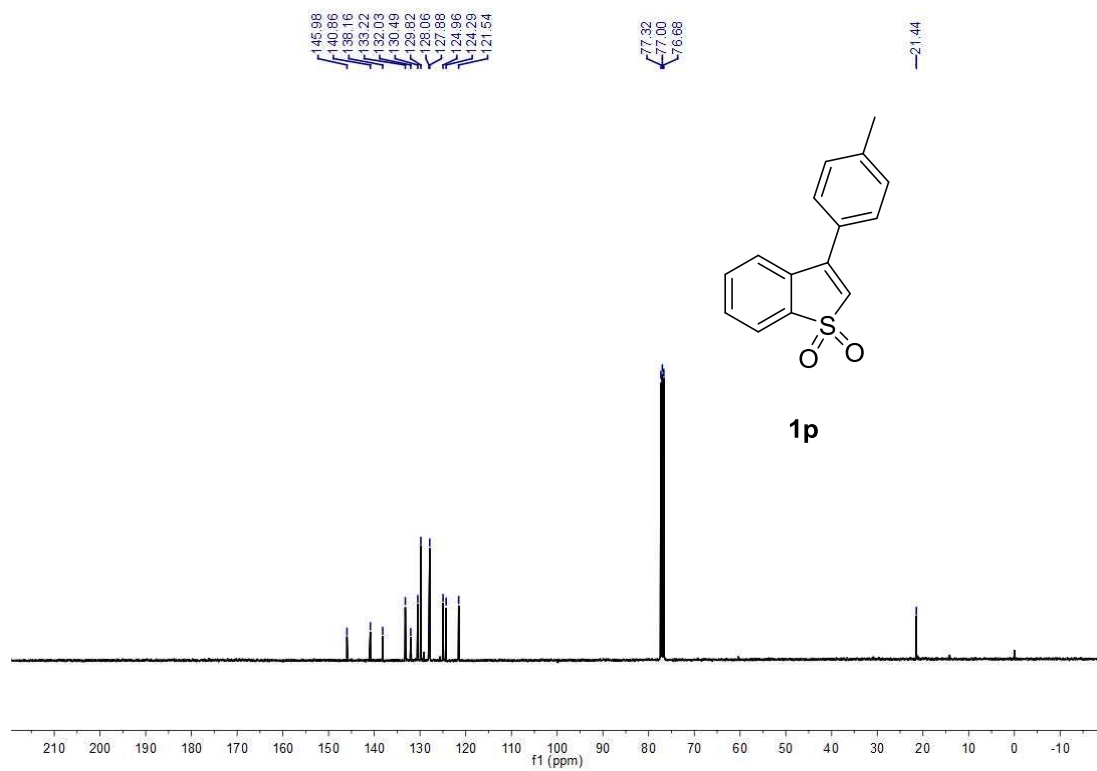

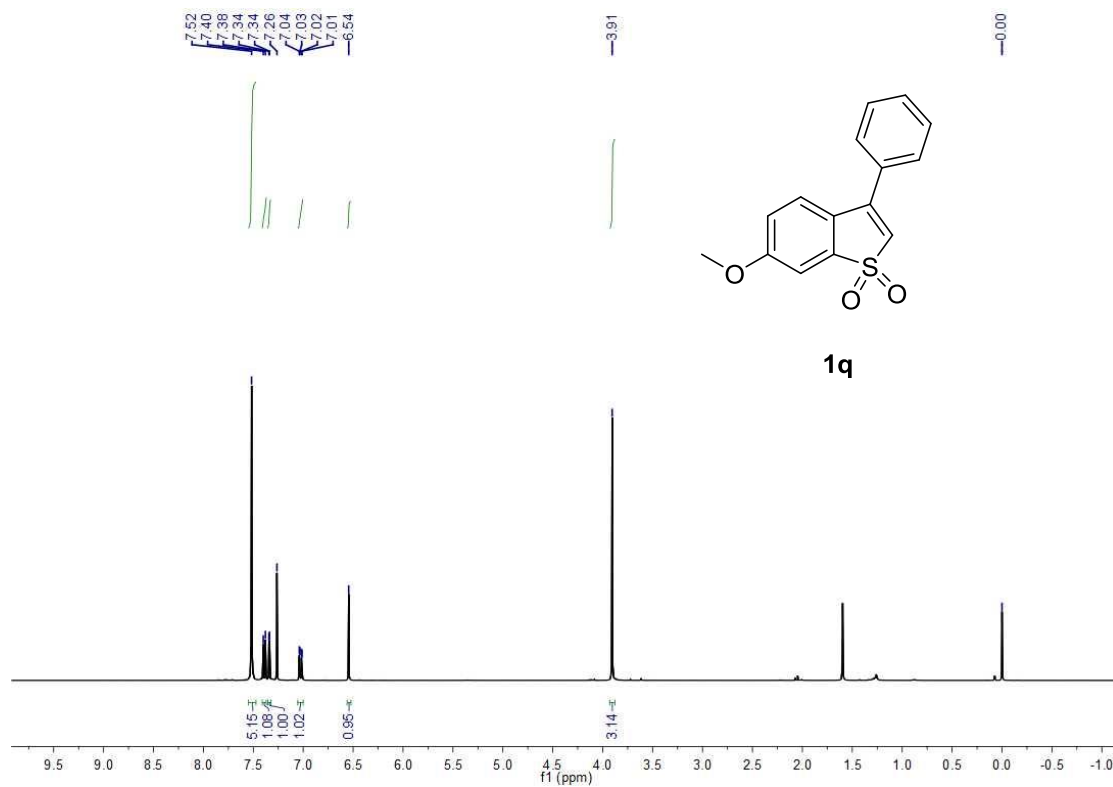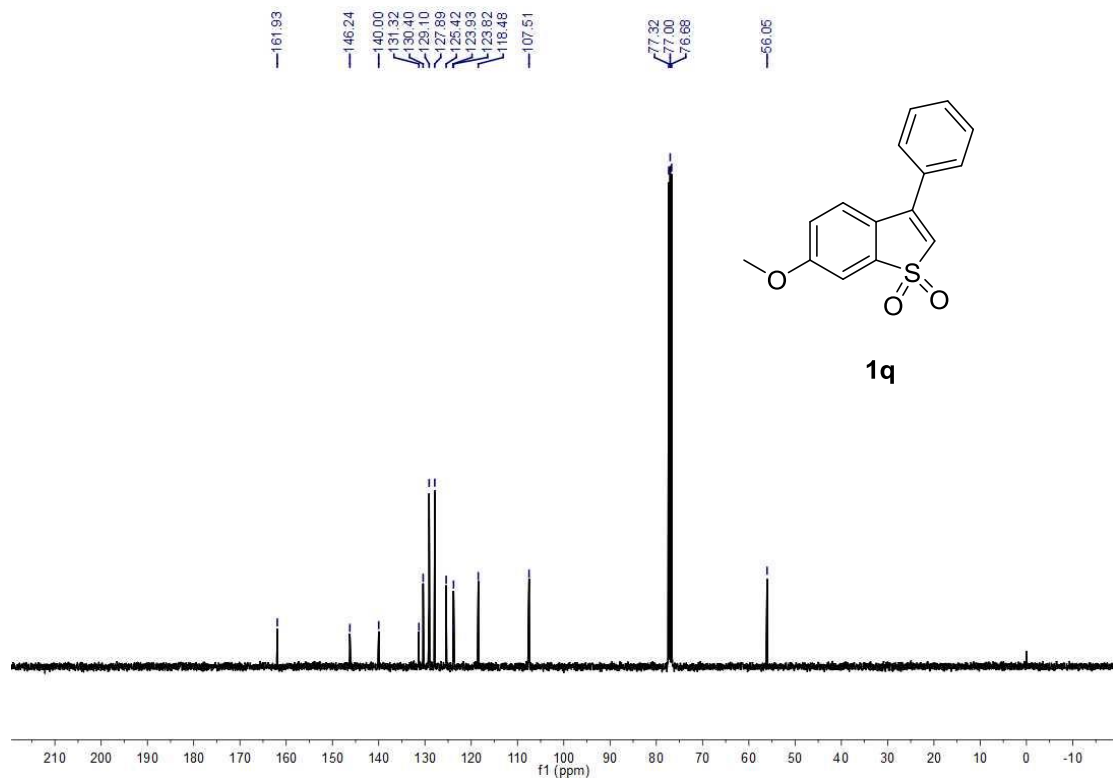

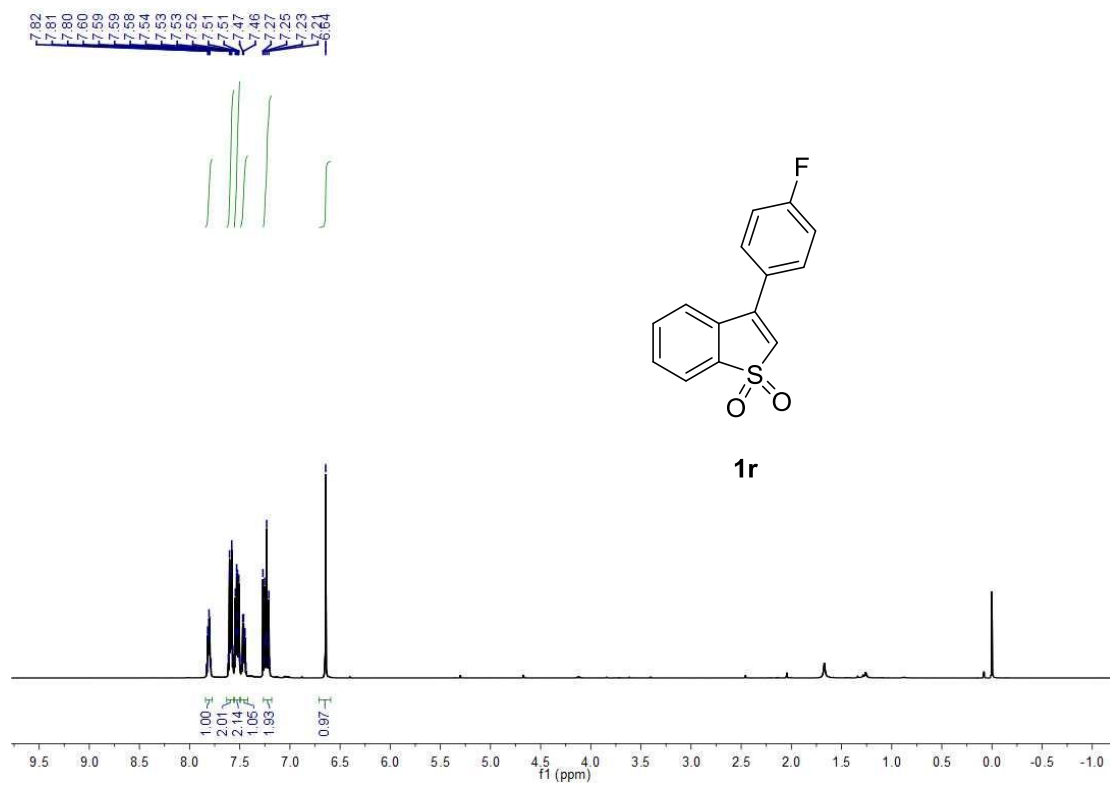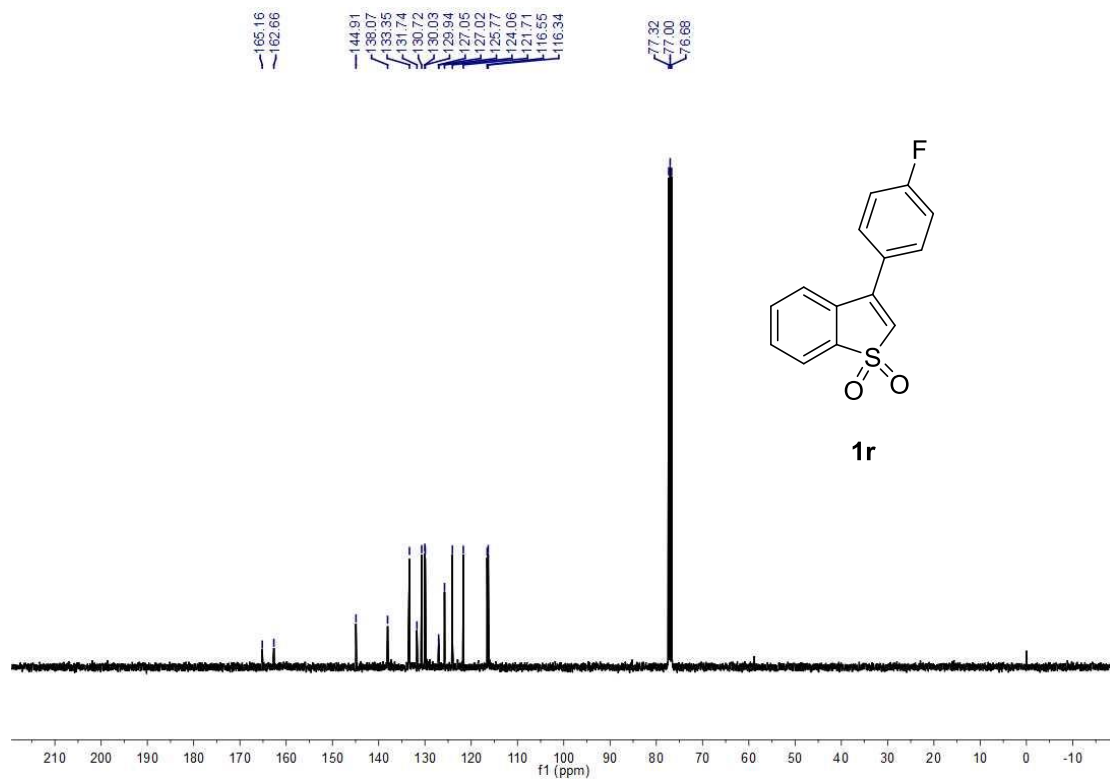

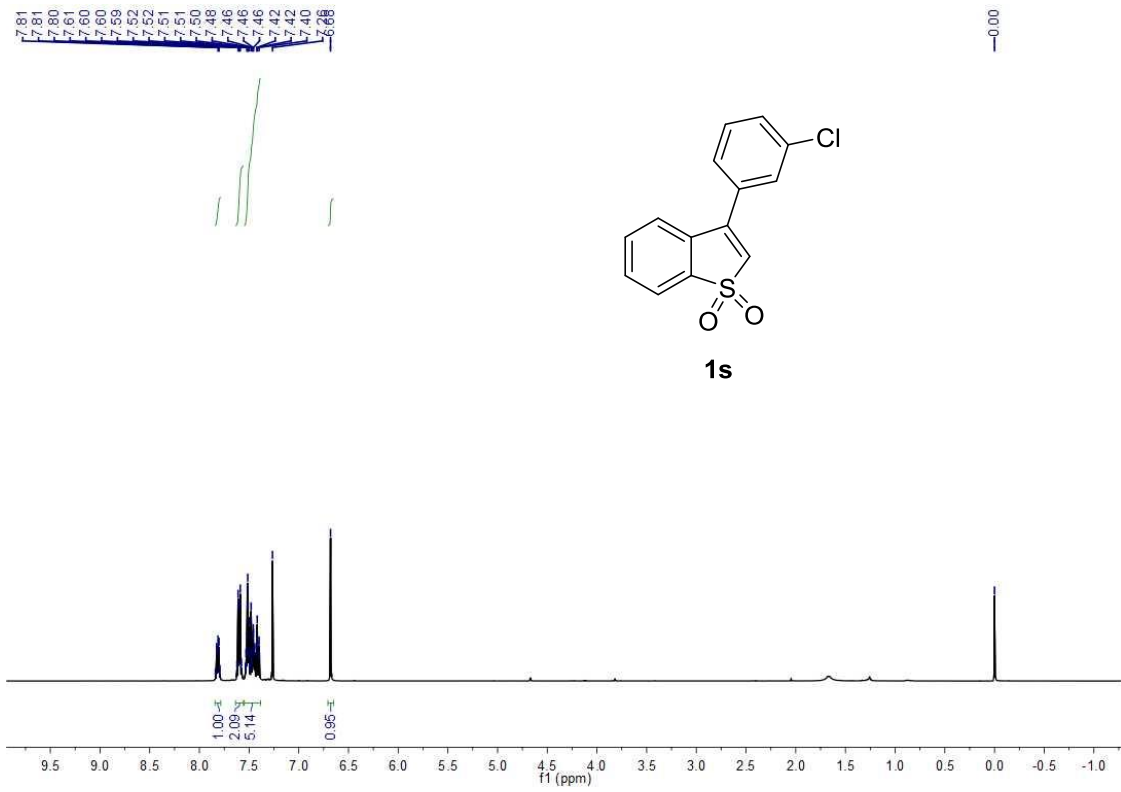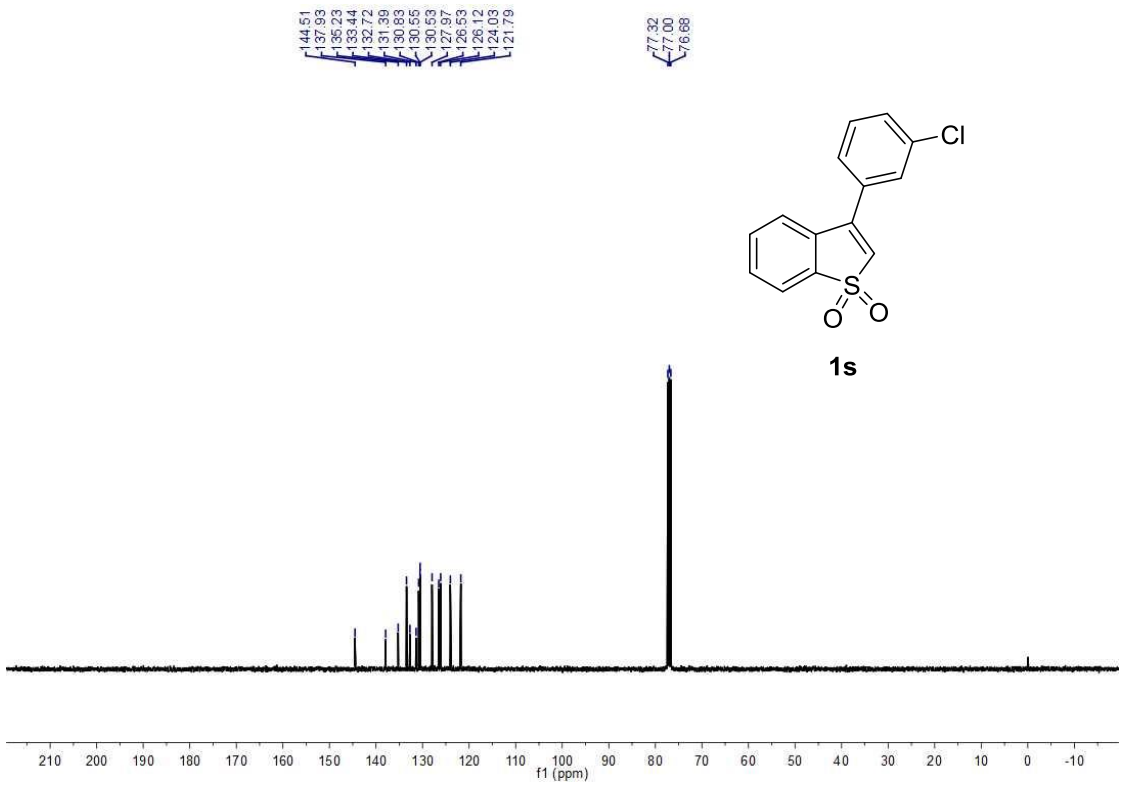



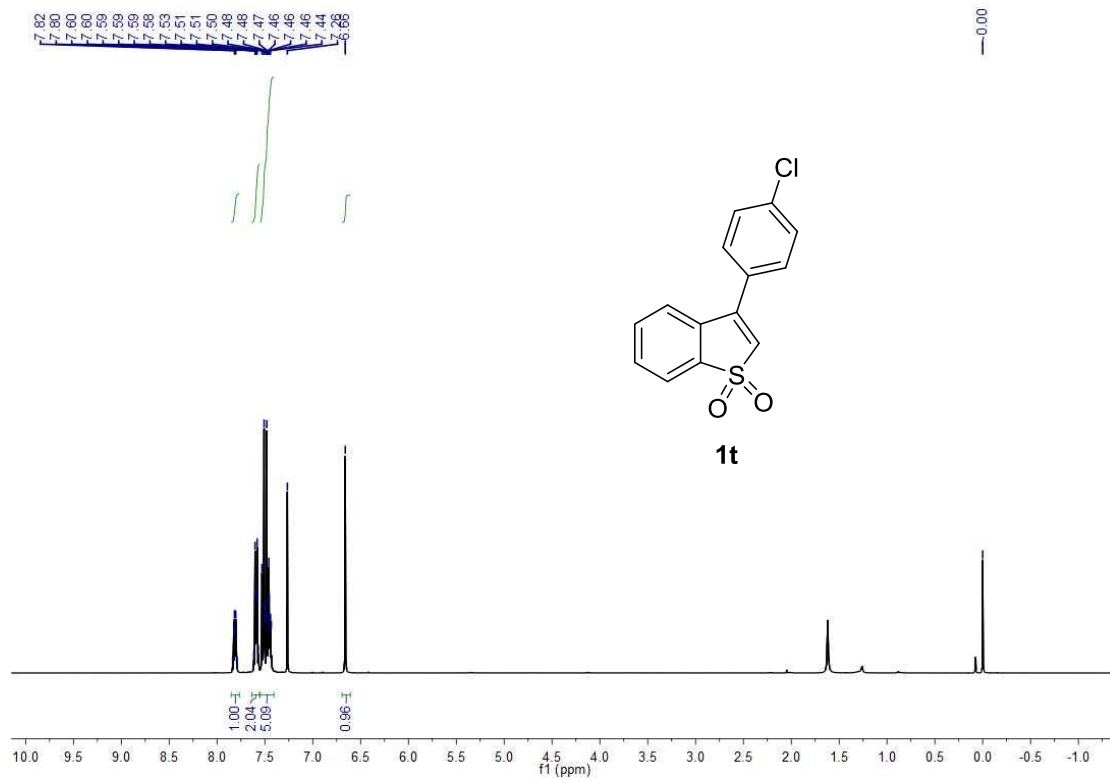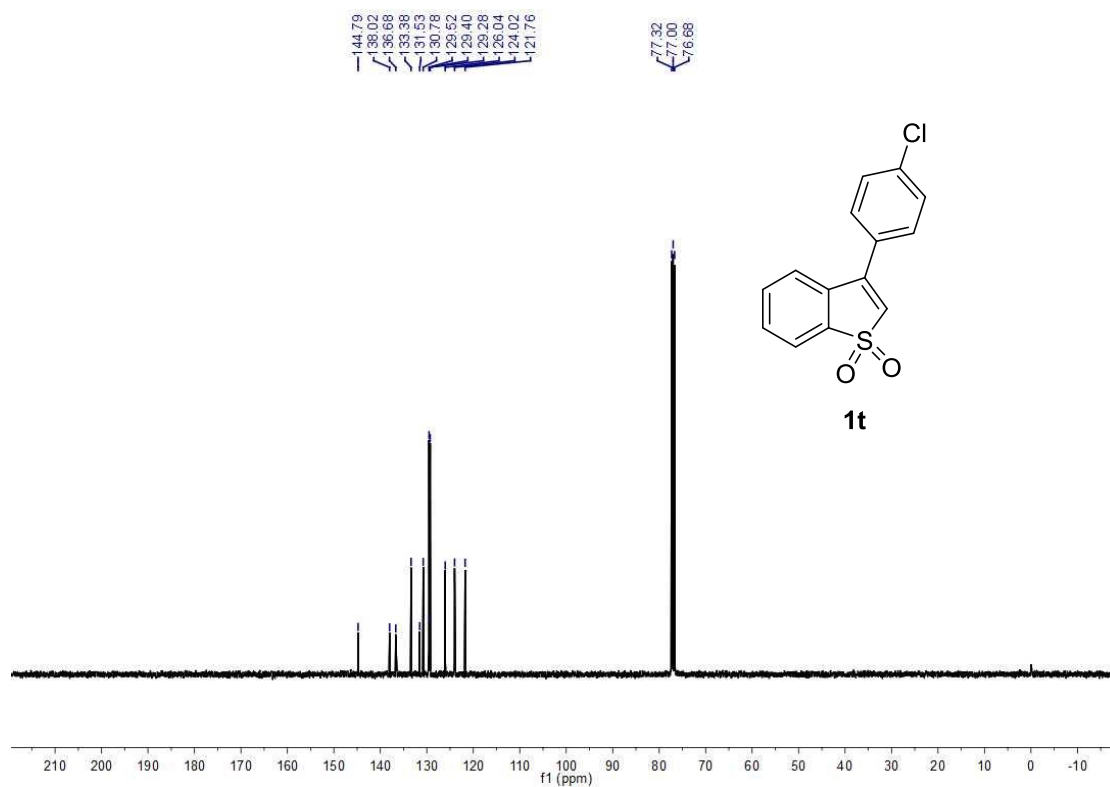

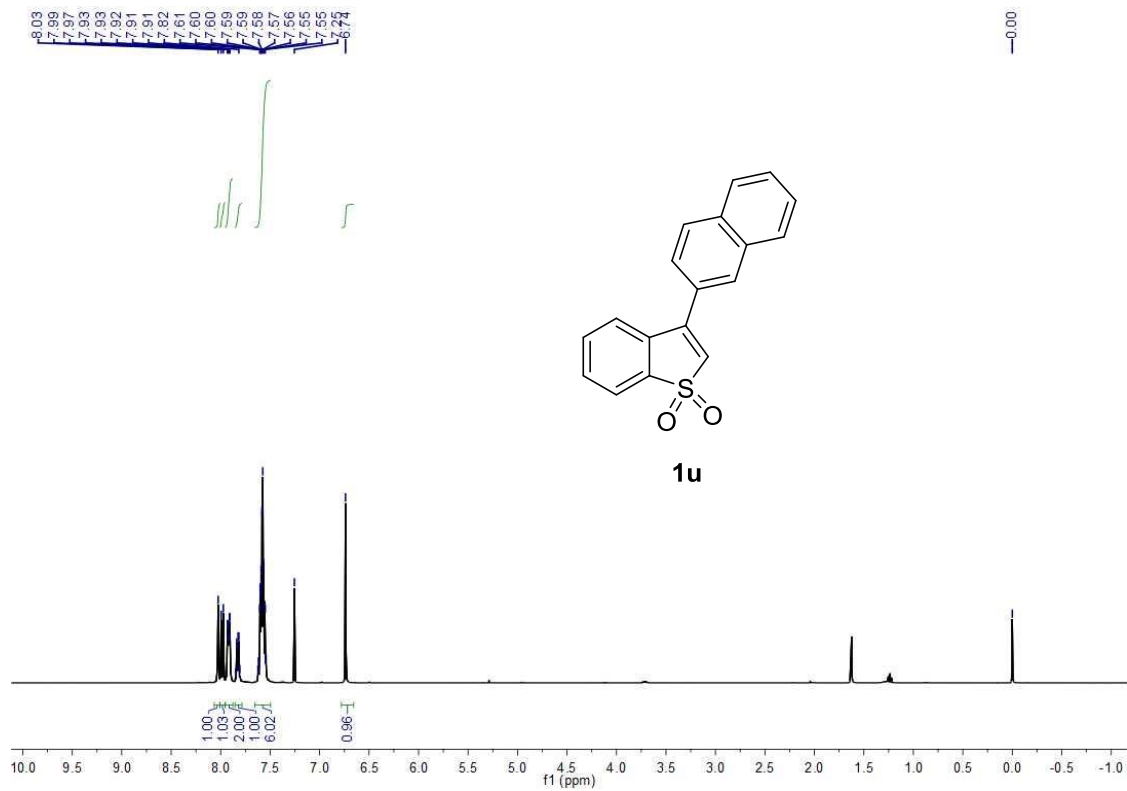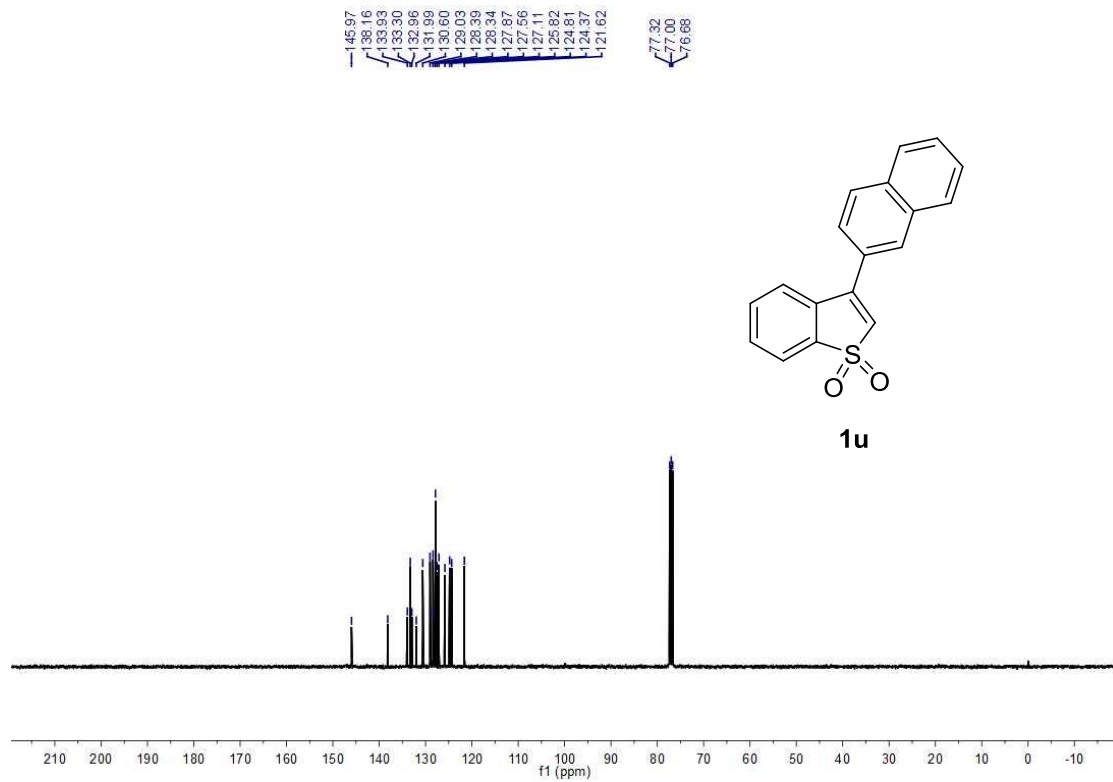

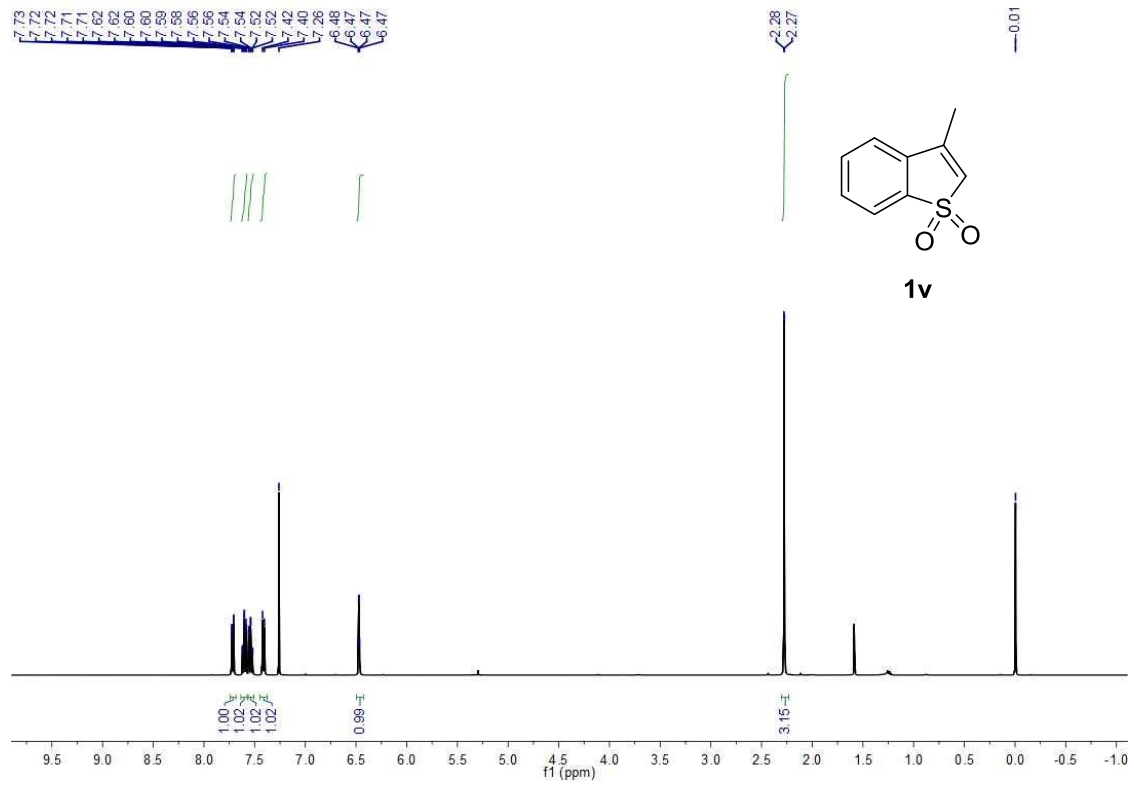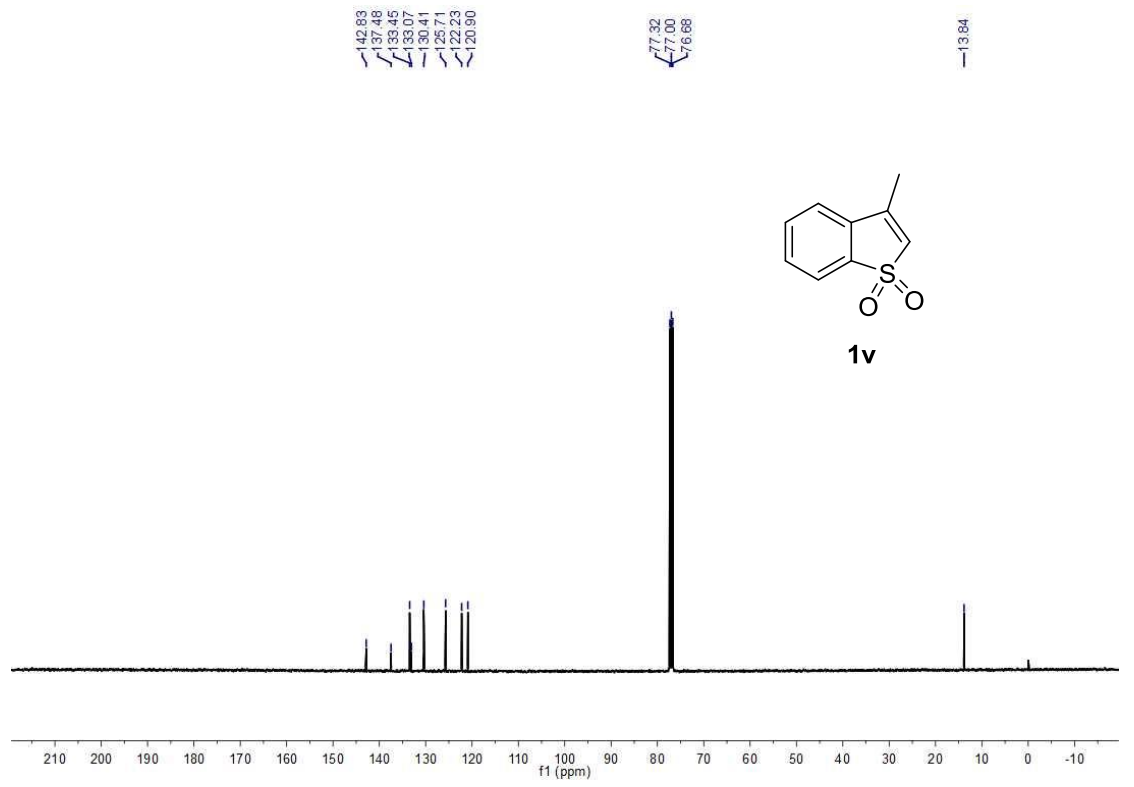

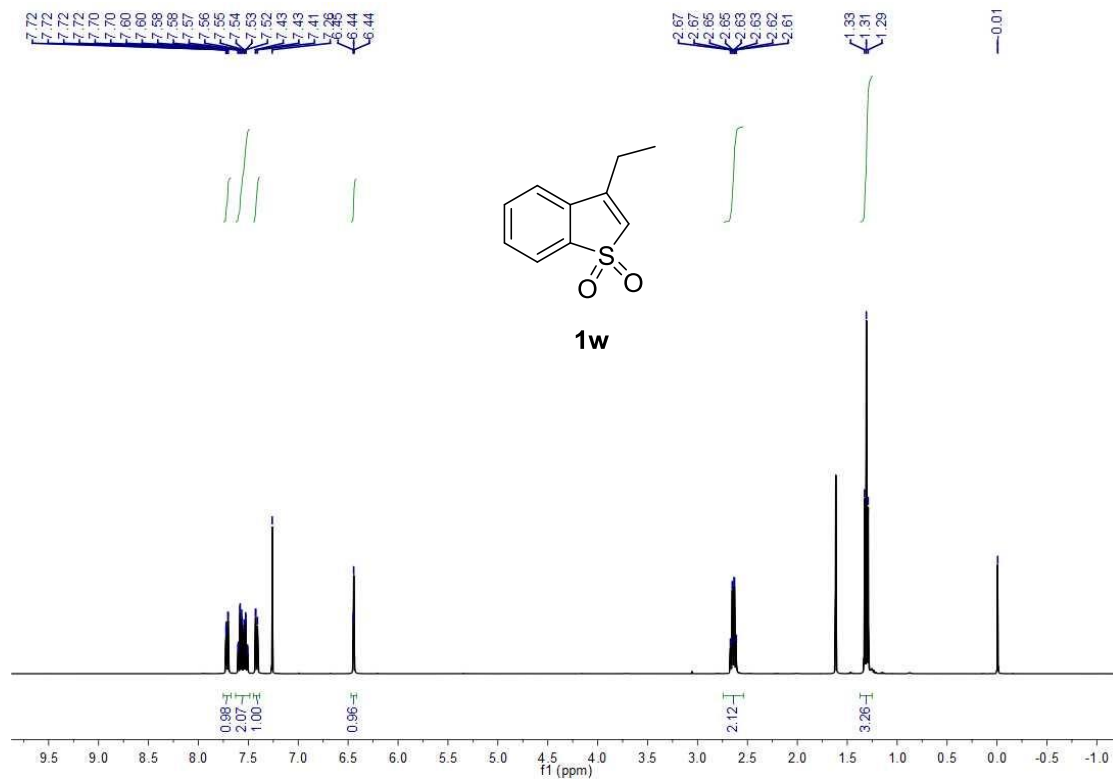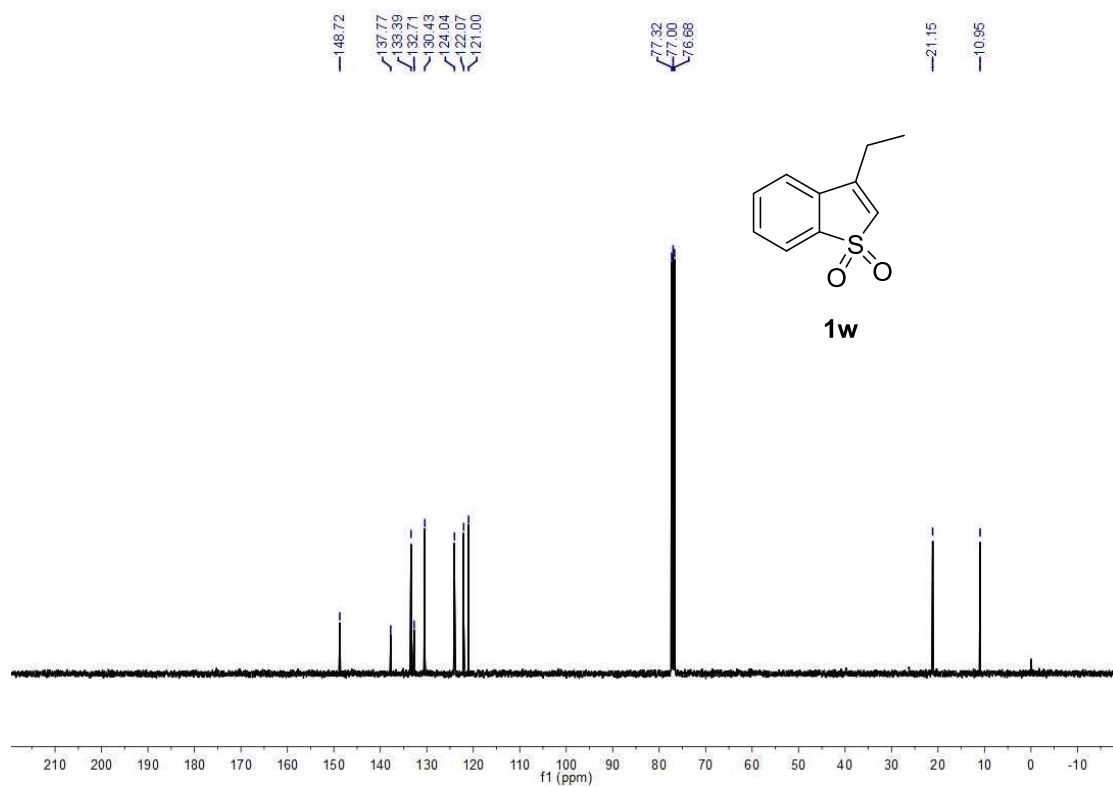

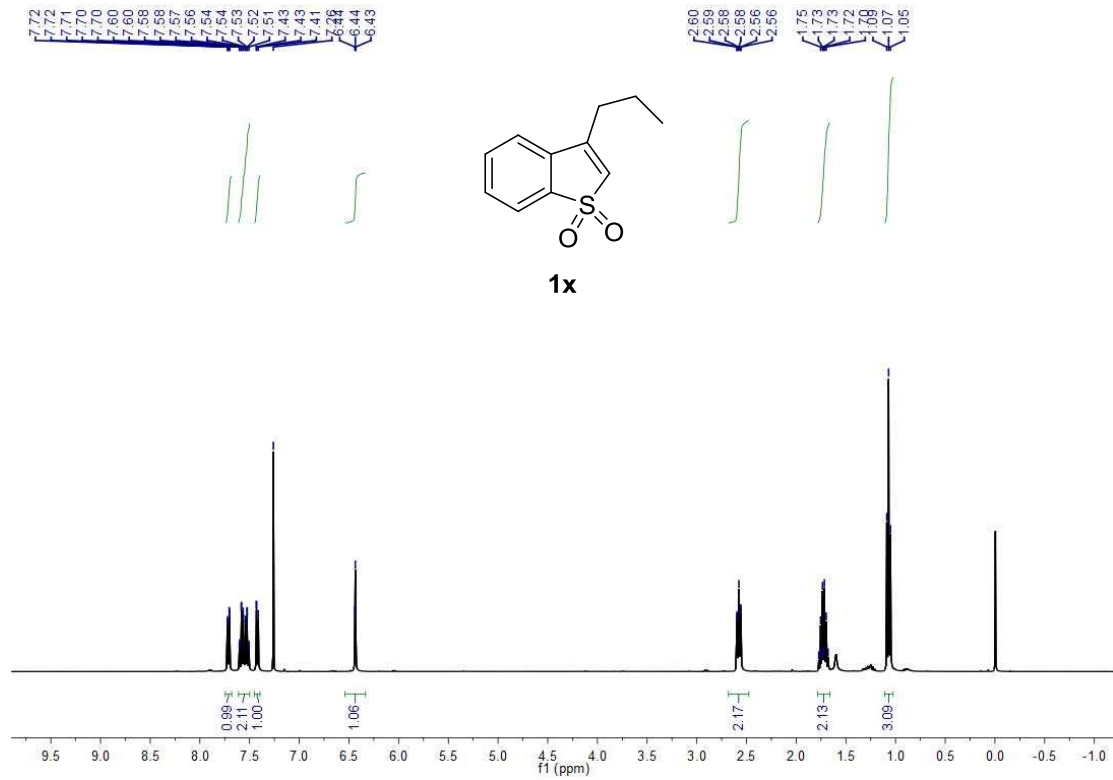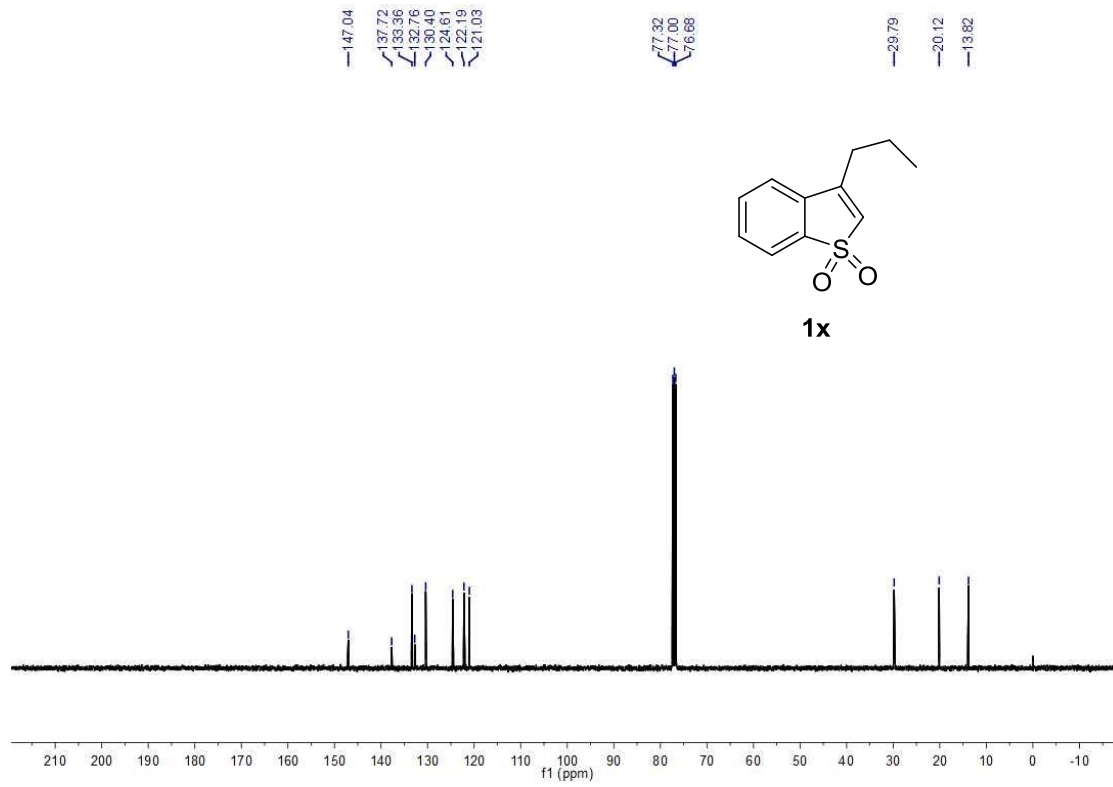

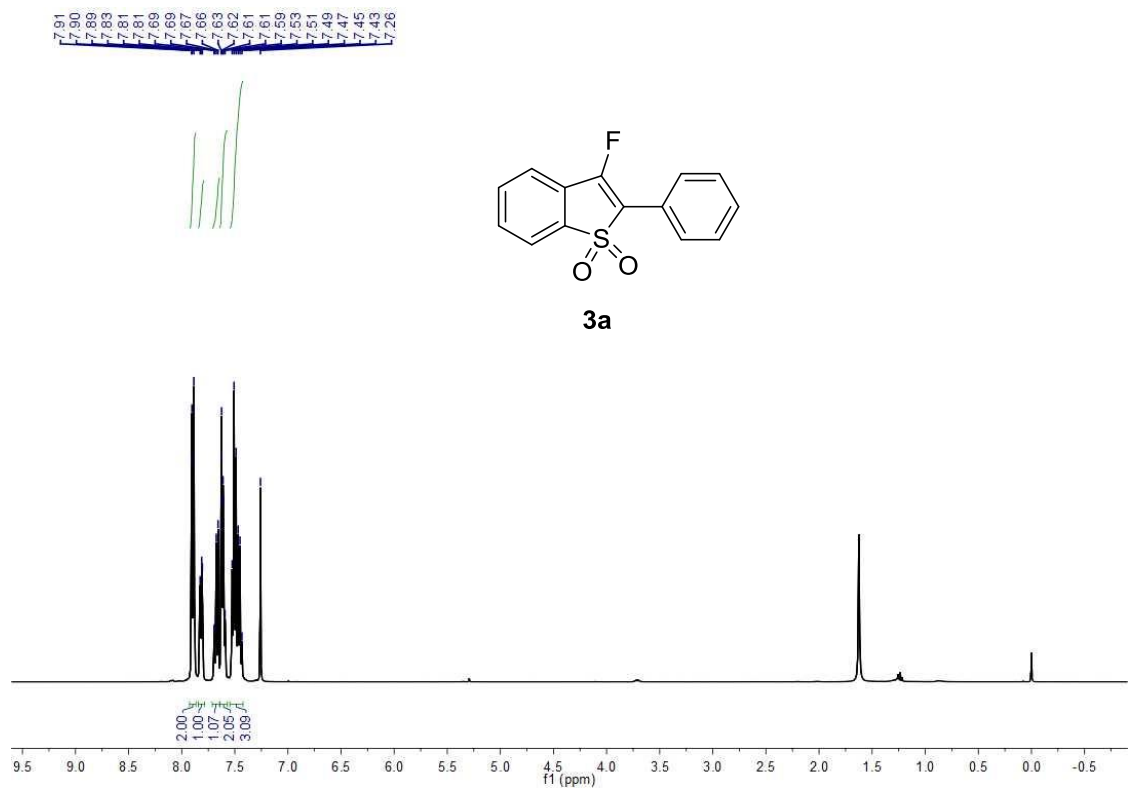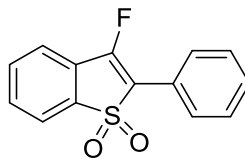

**3a**

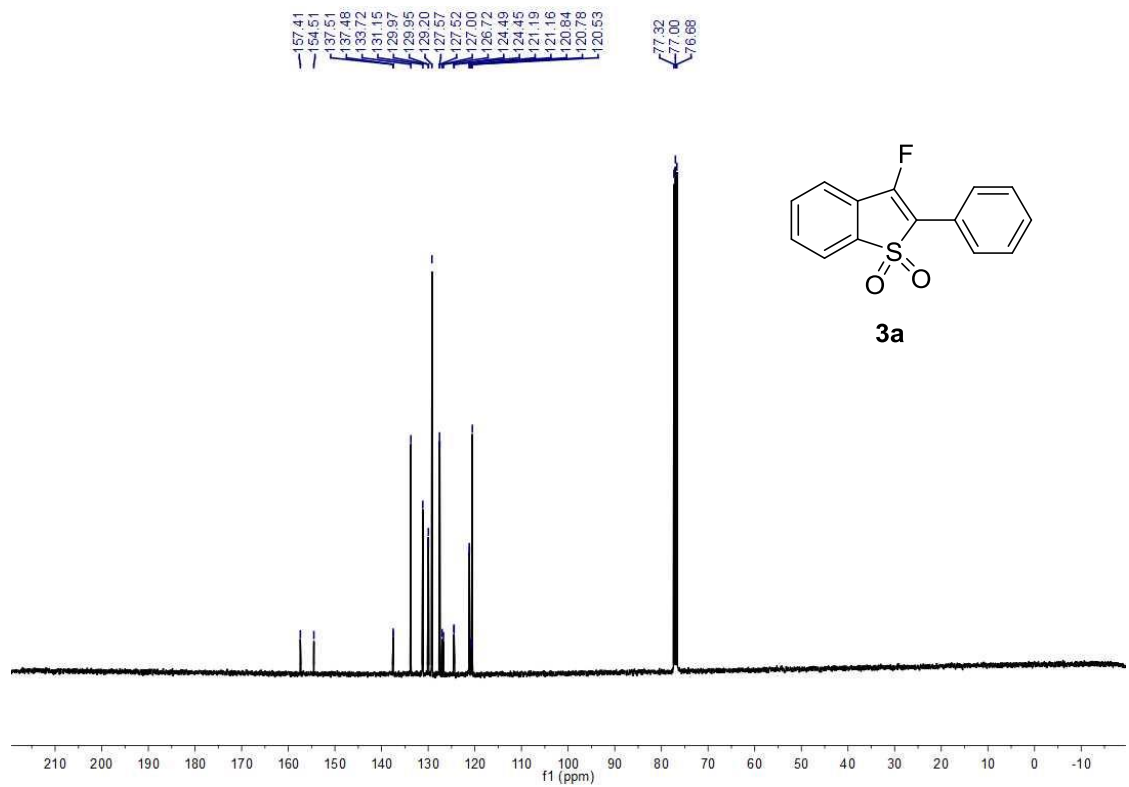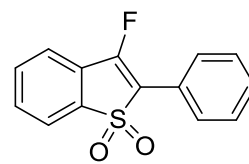

**3a**

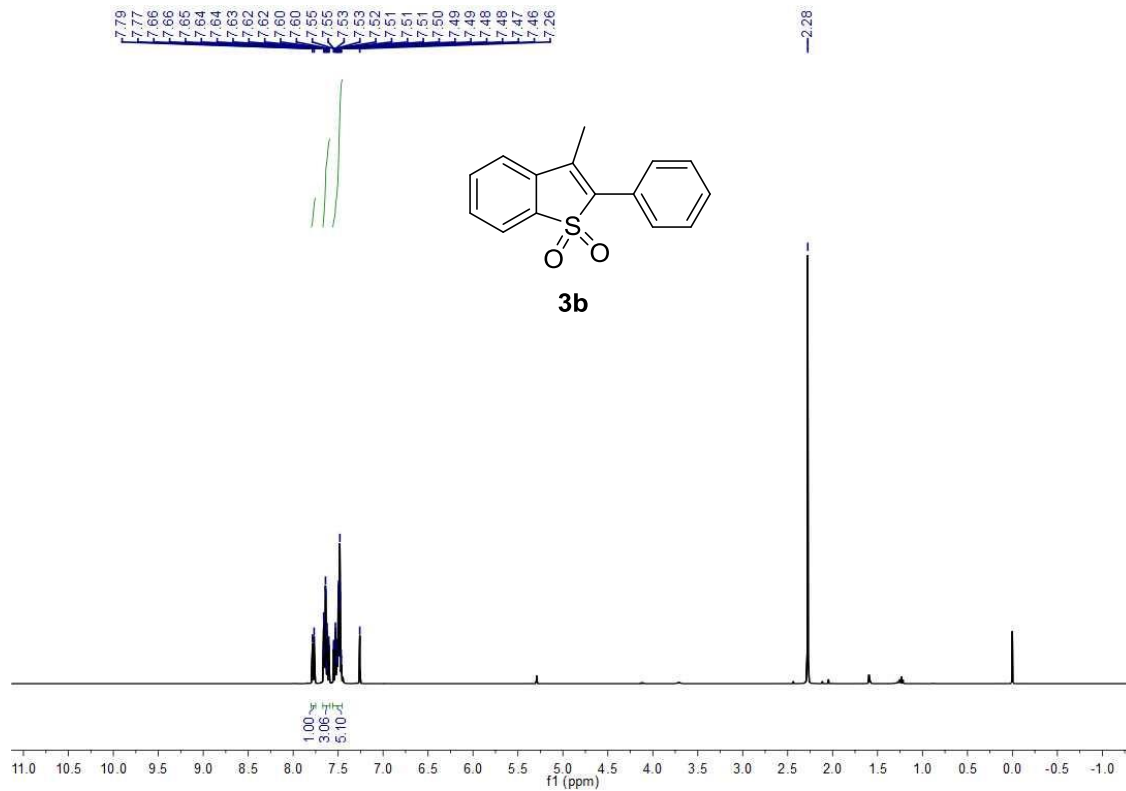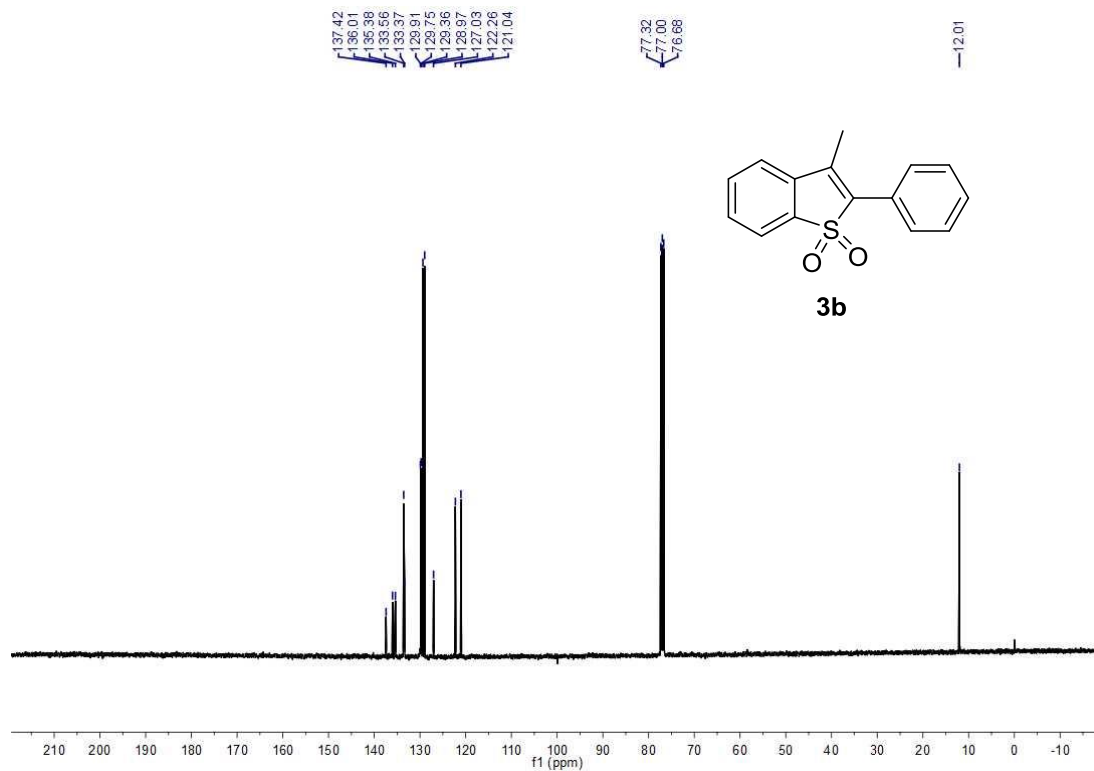

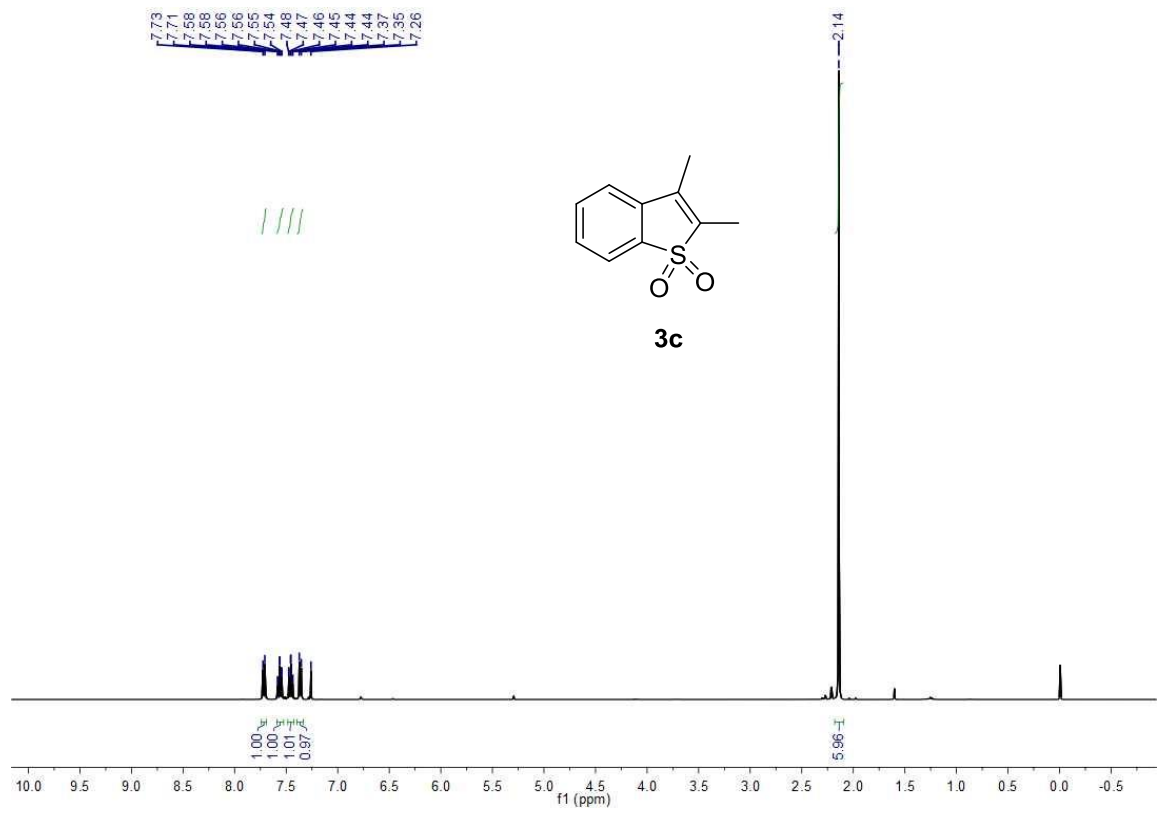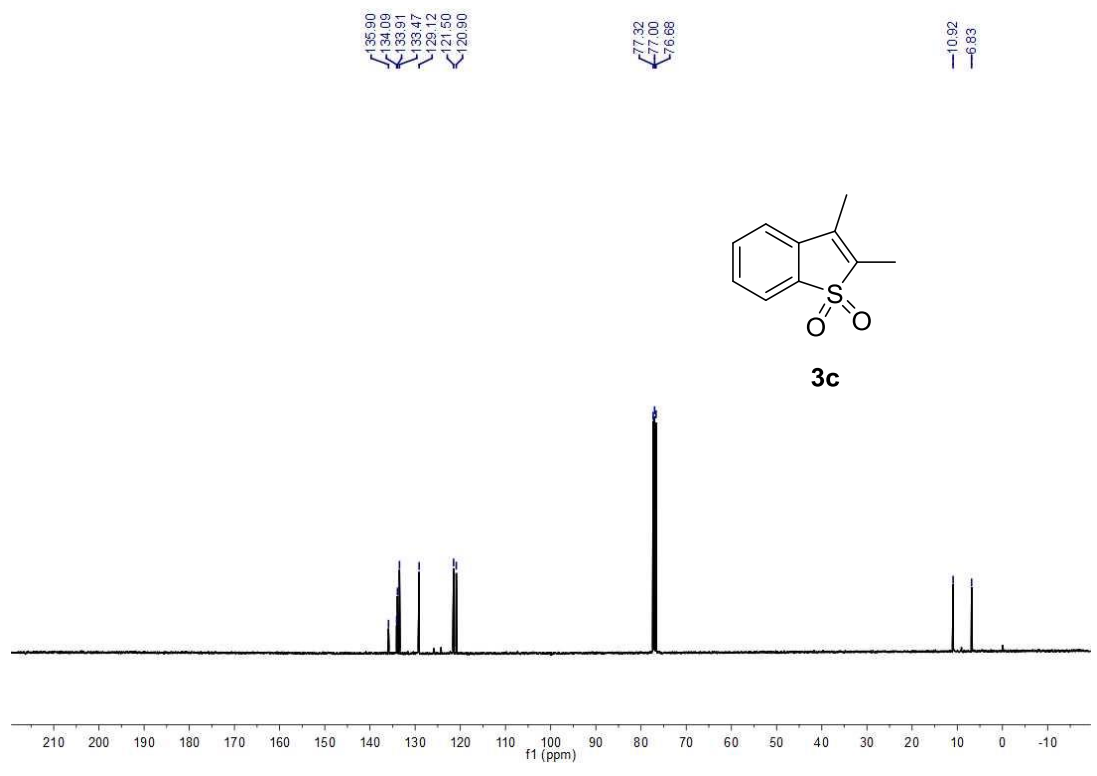



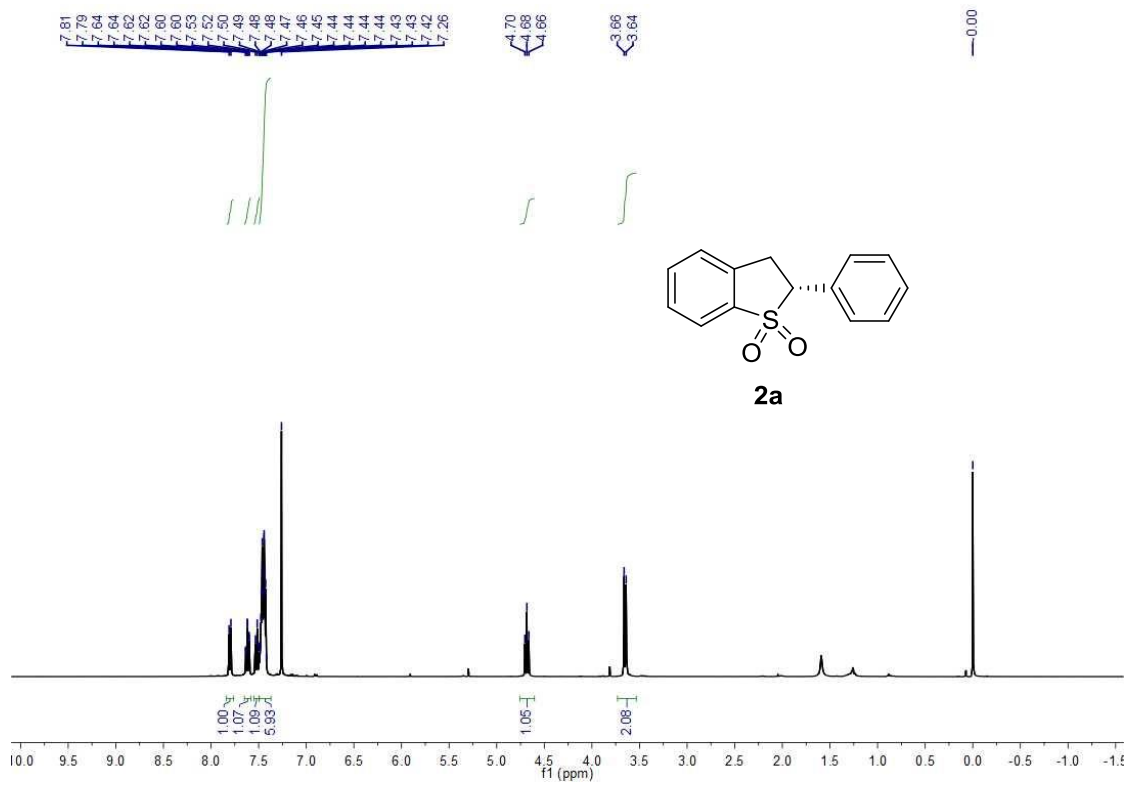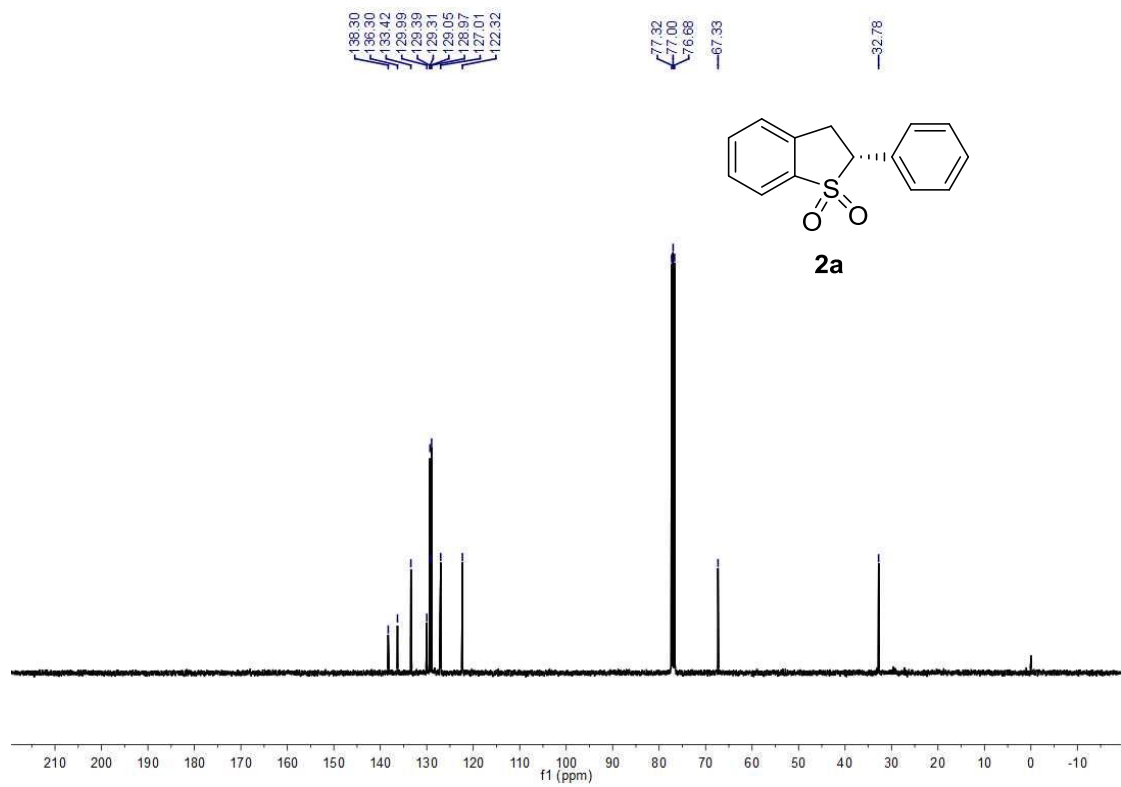

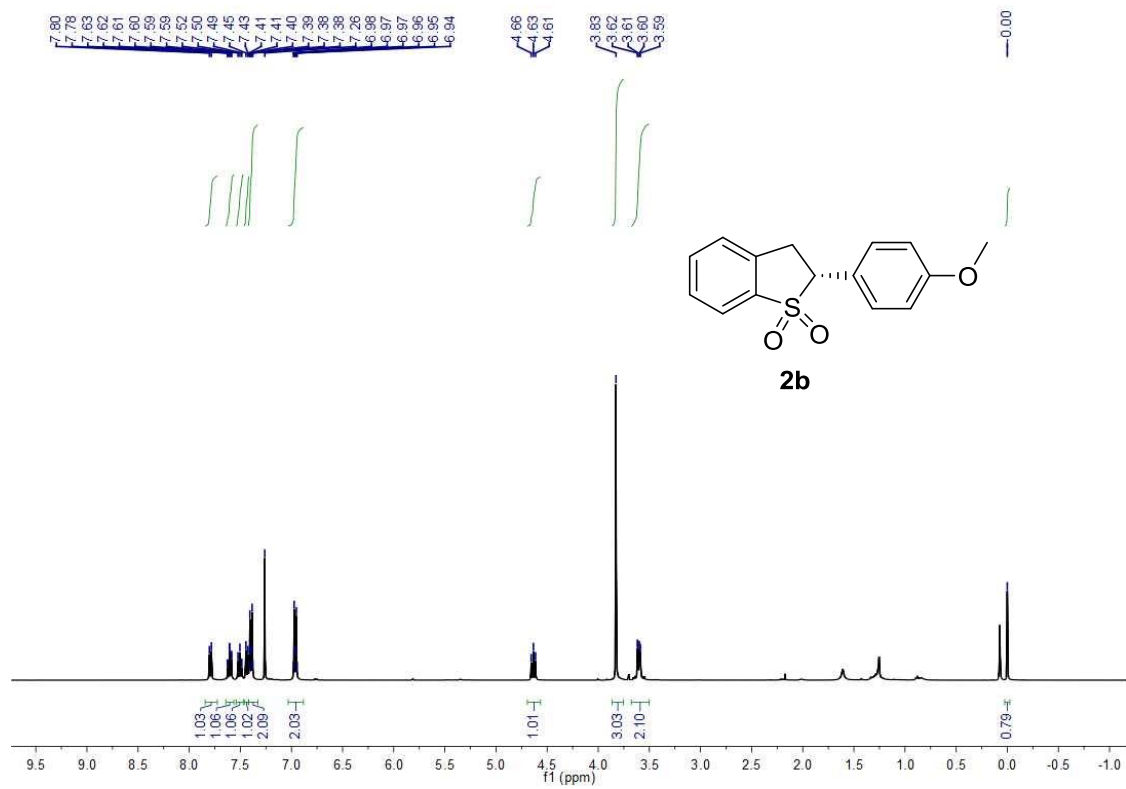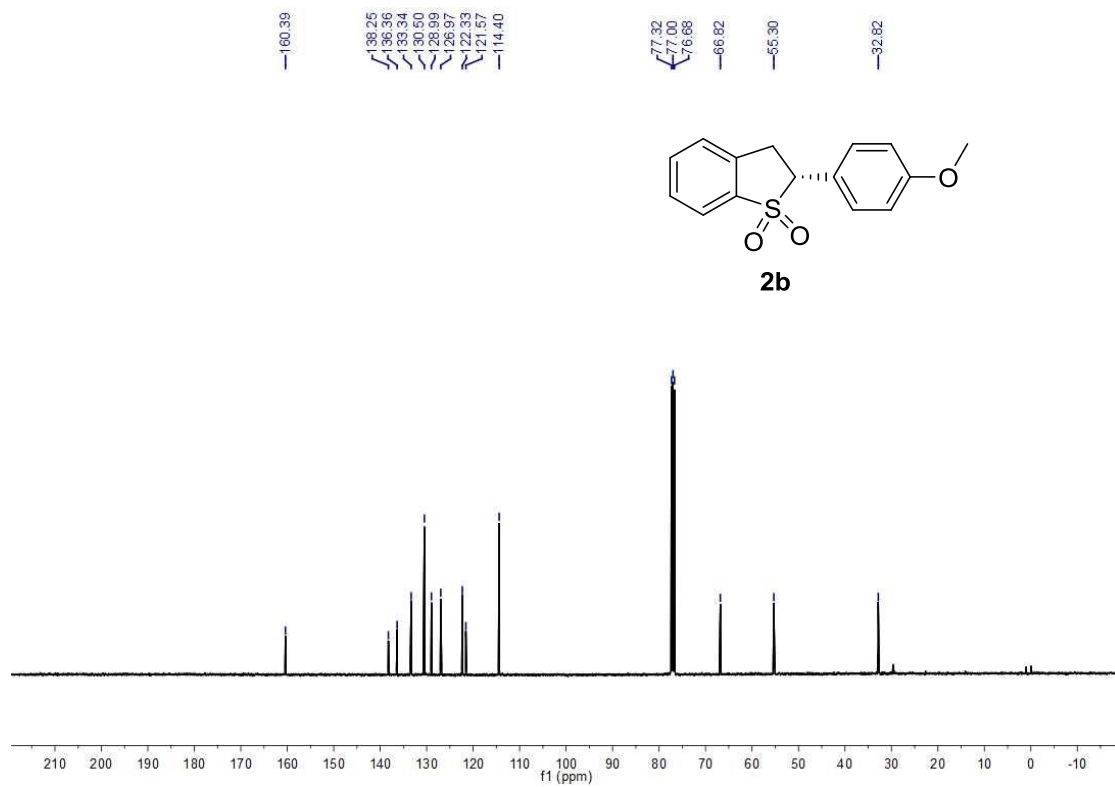

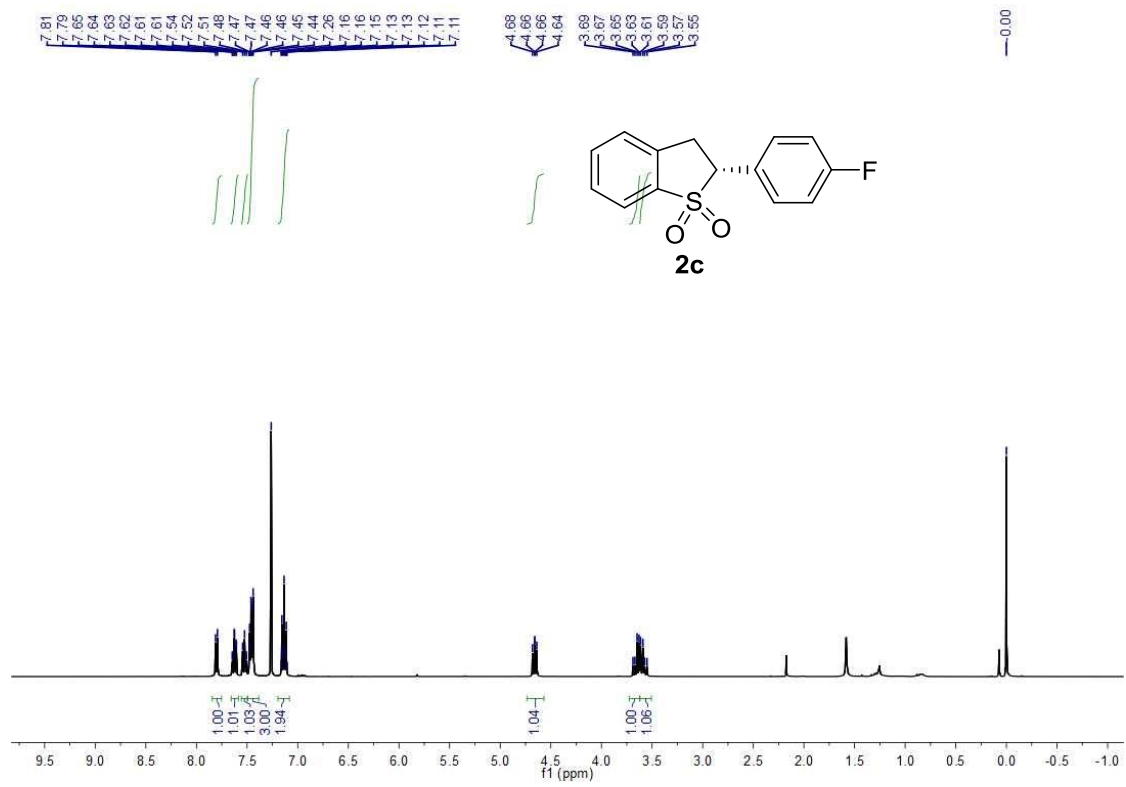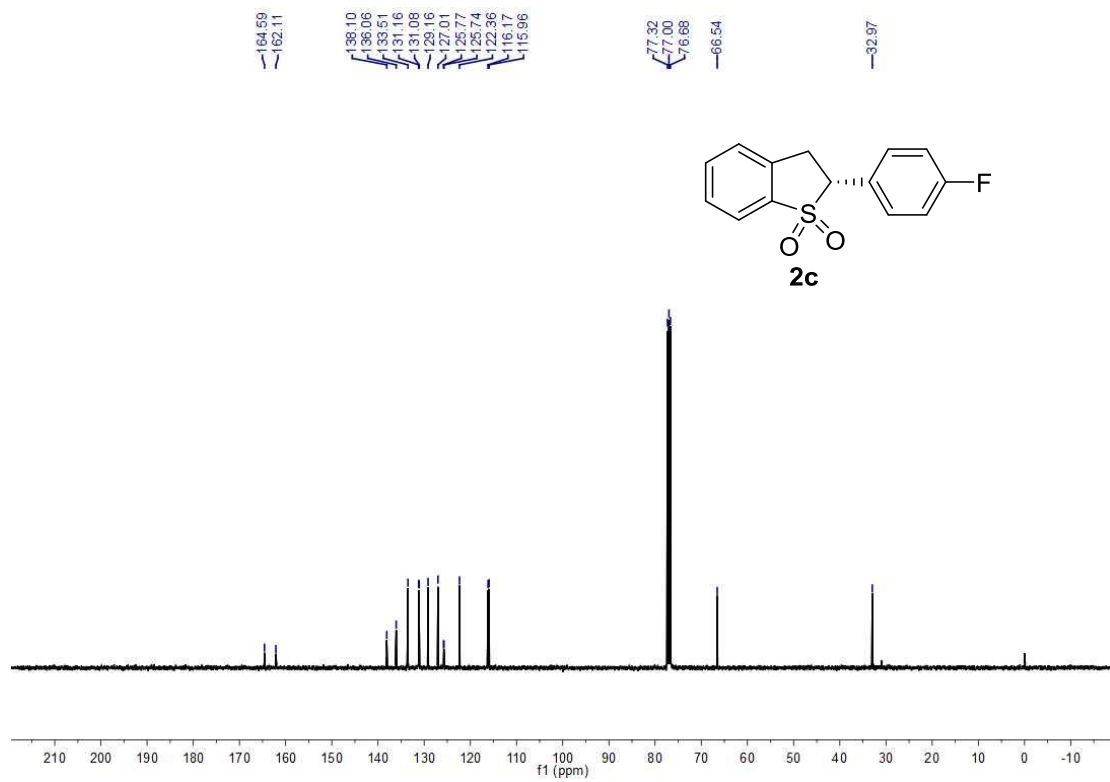

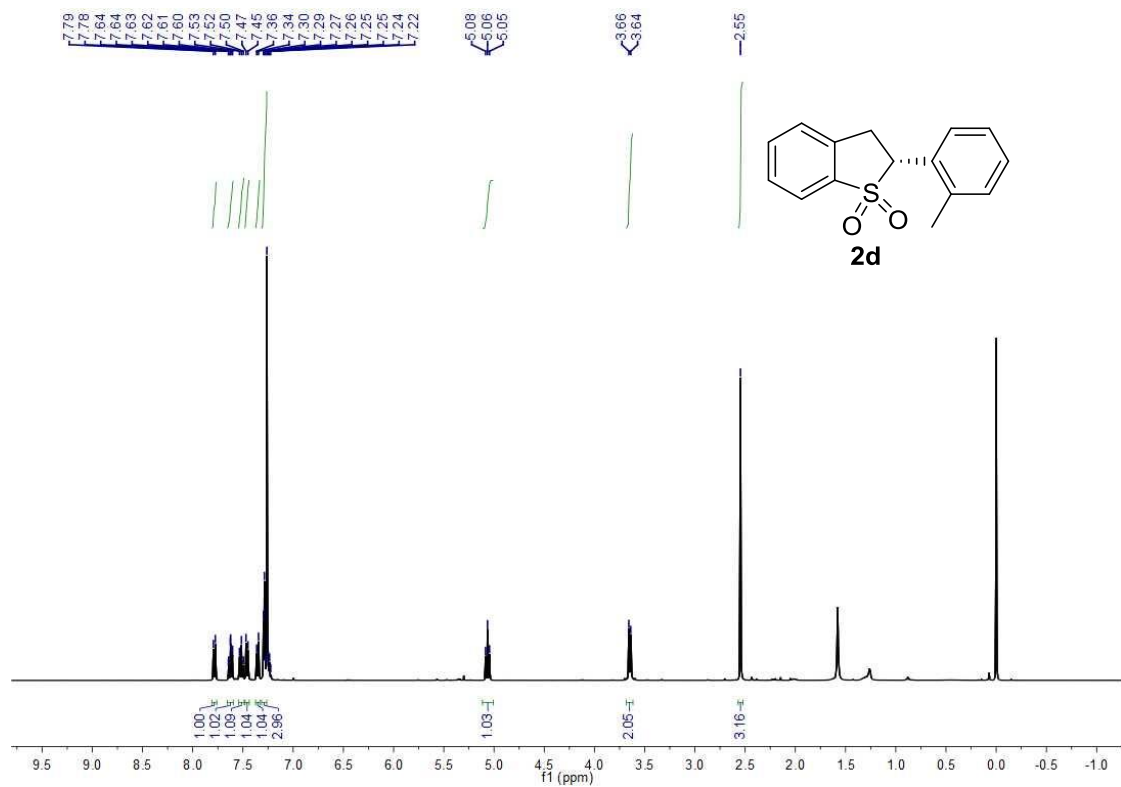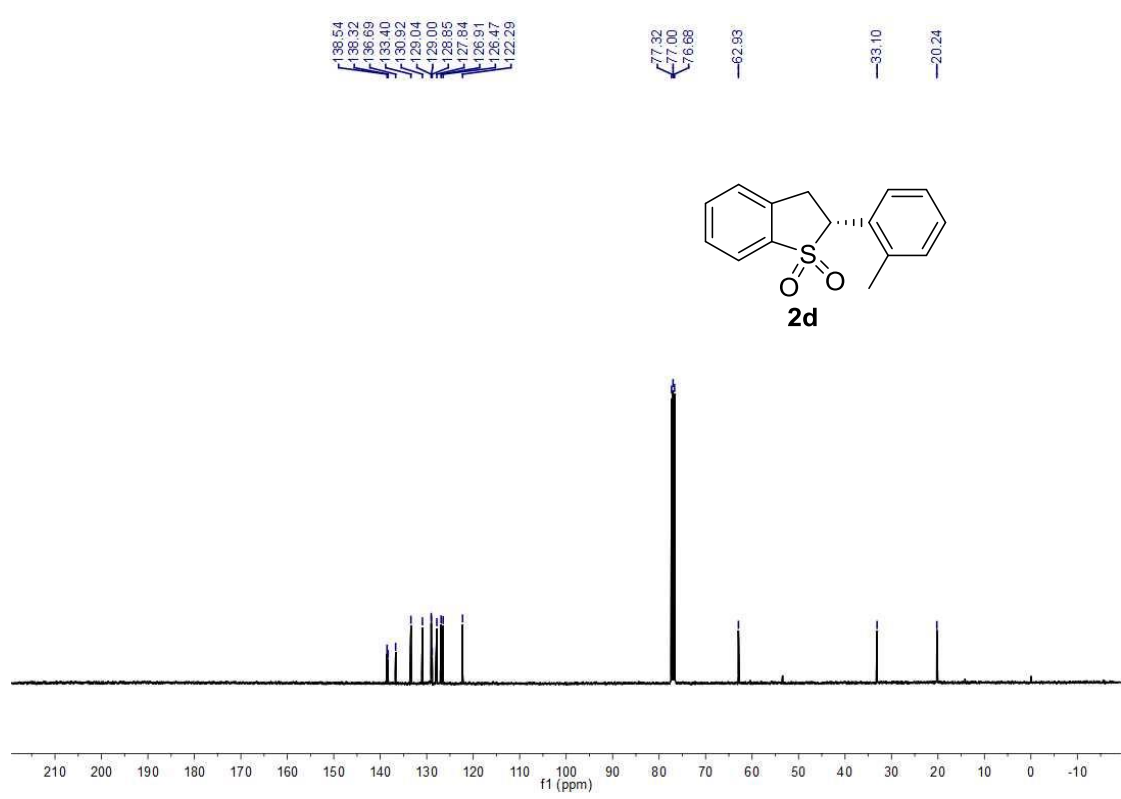

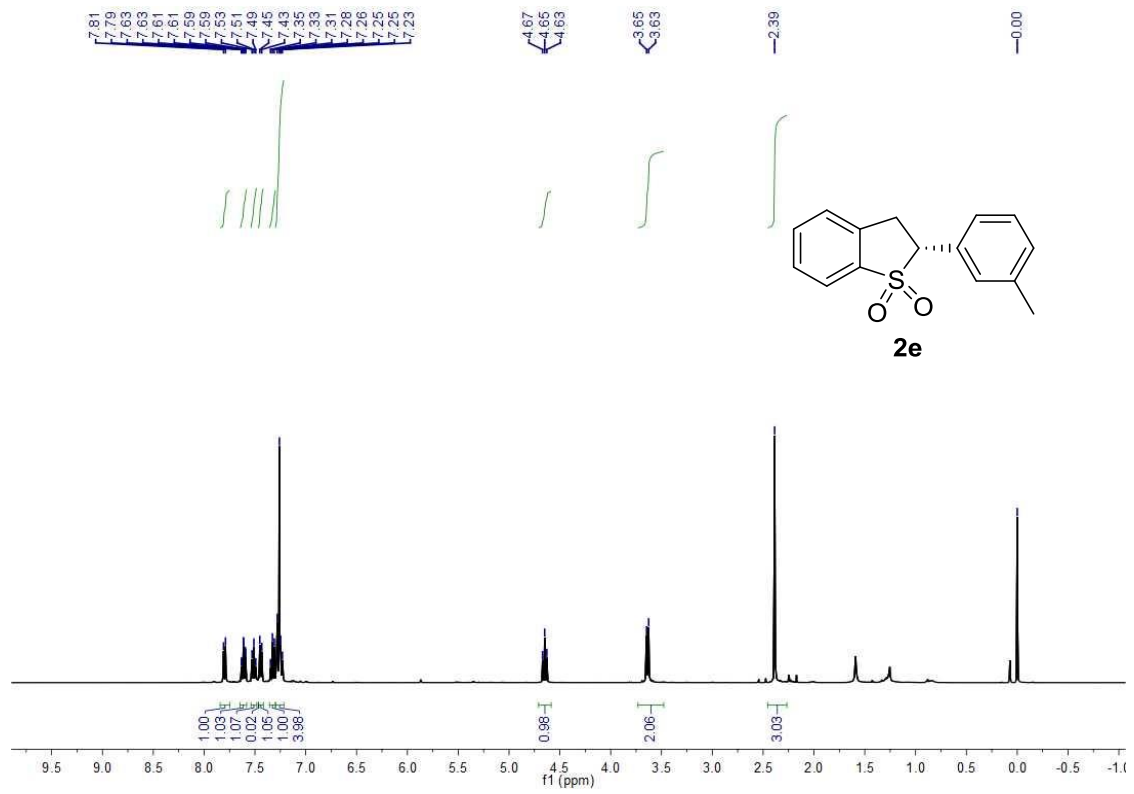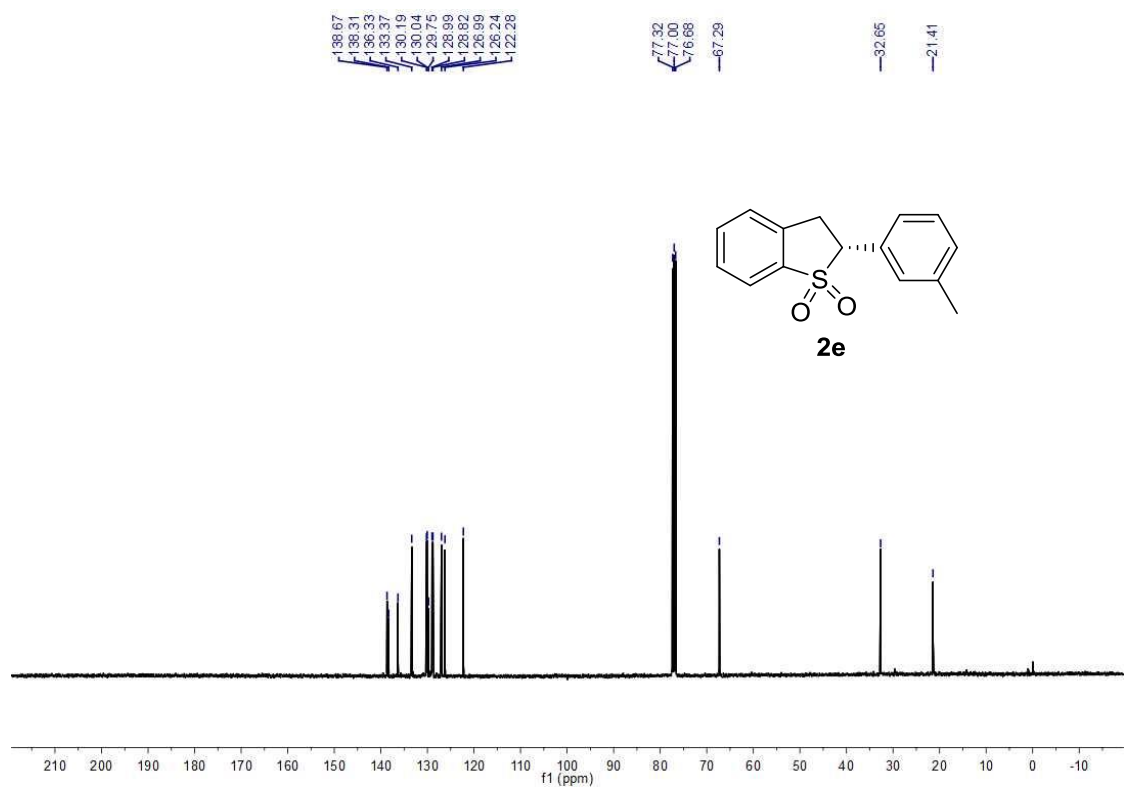

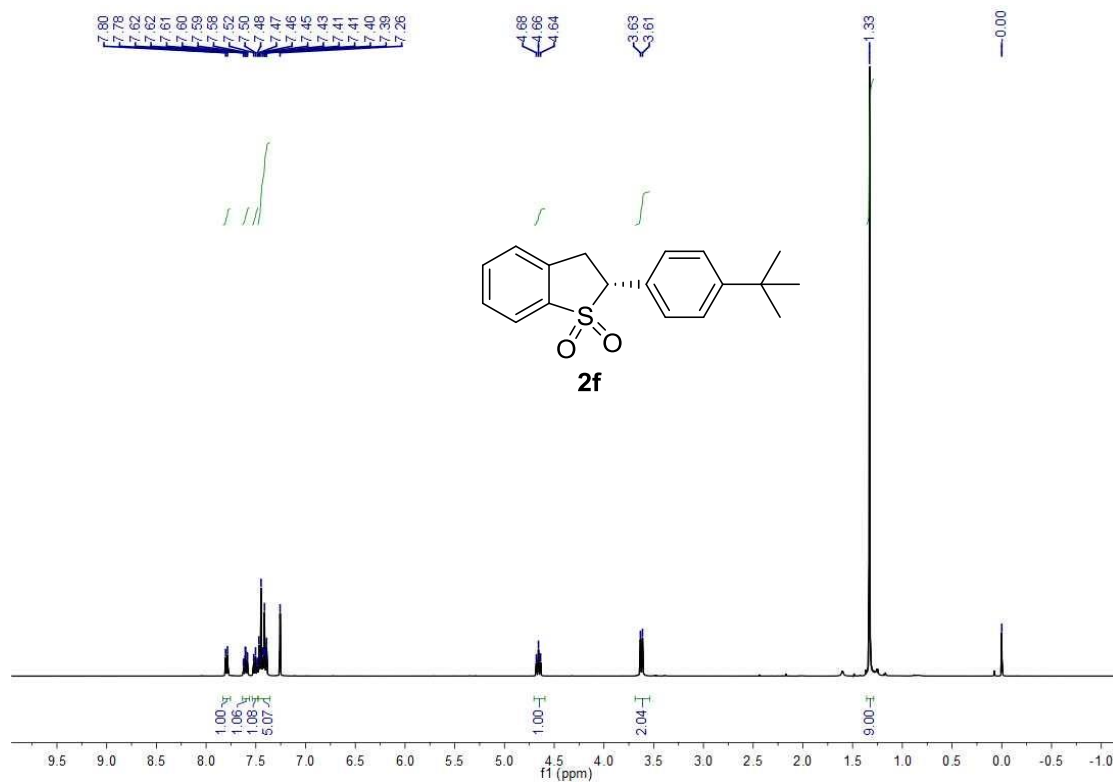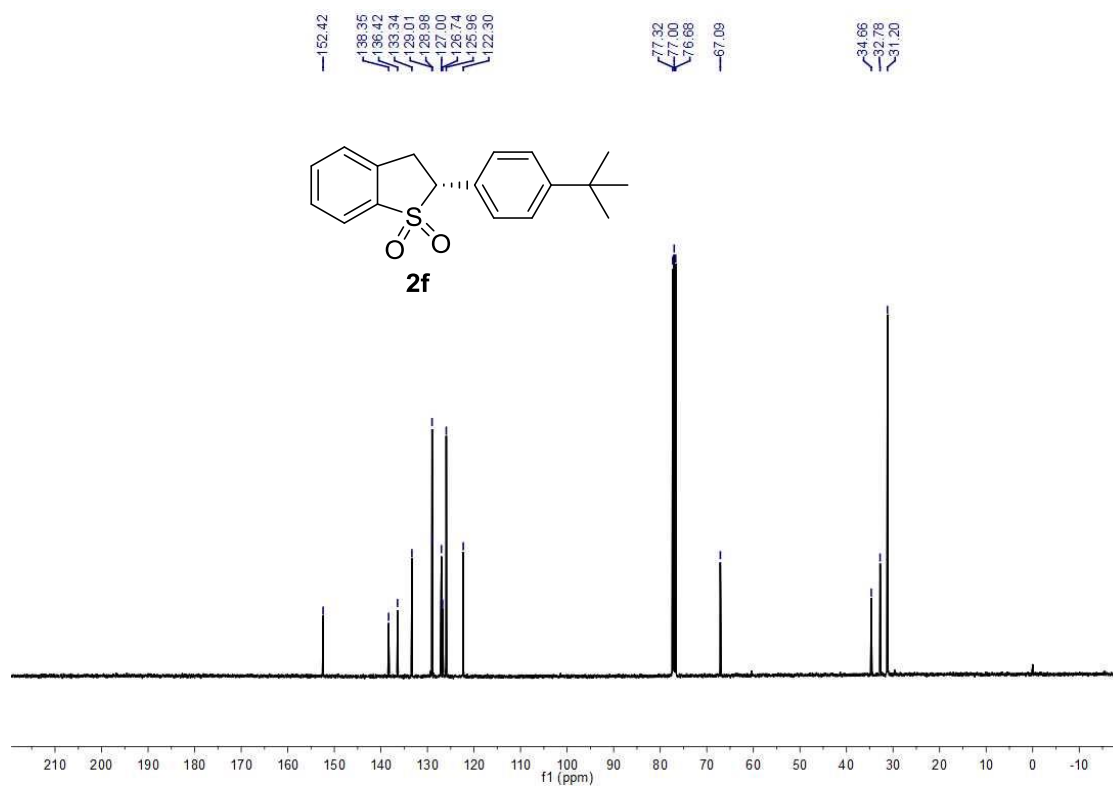

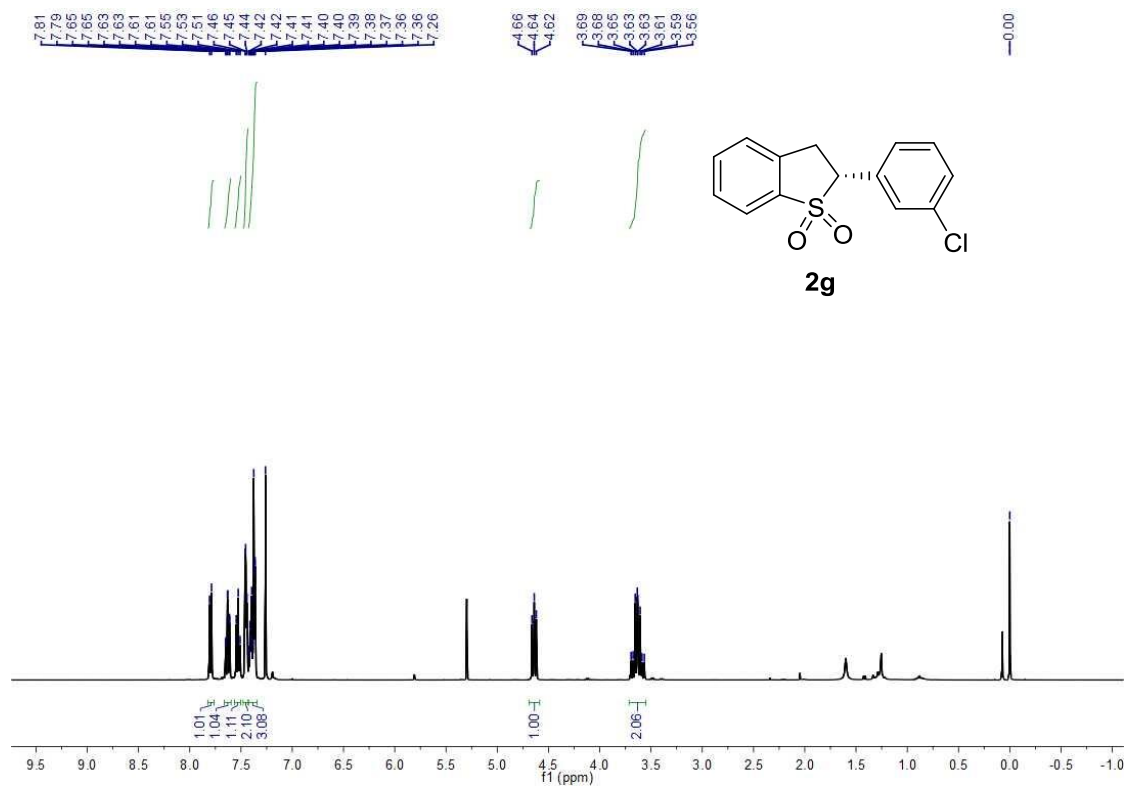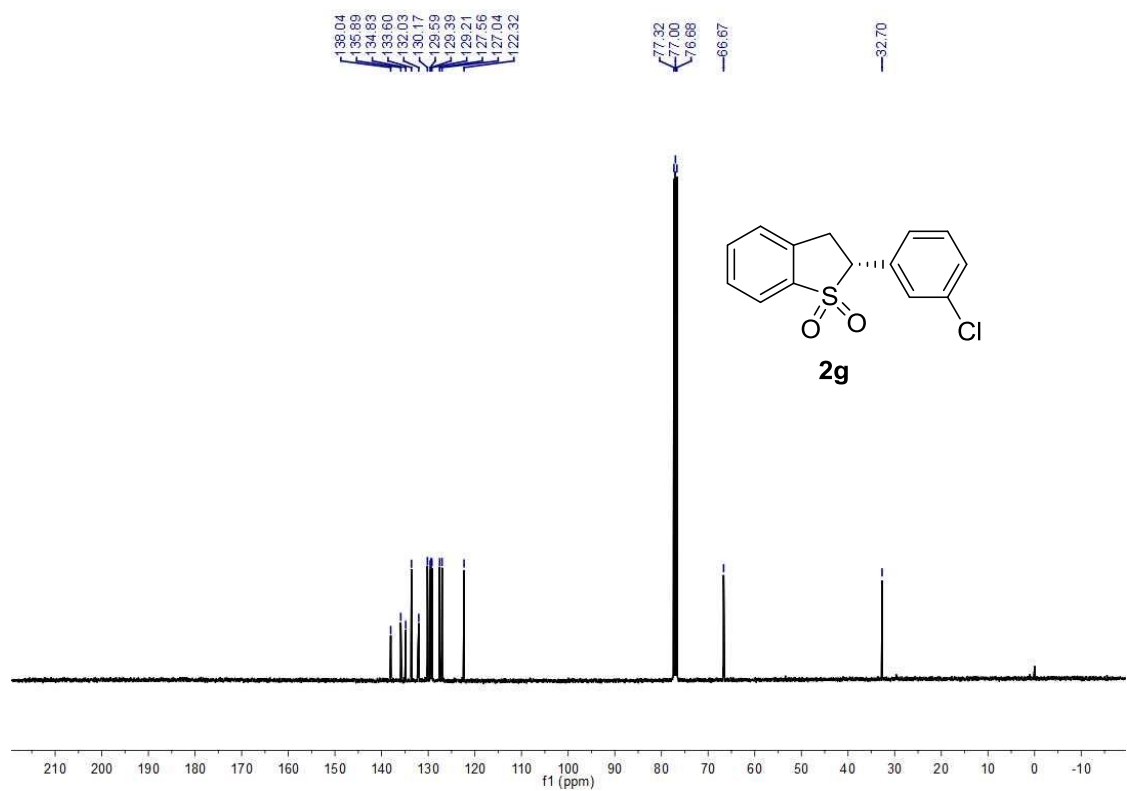

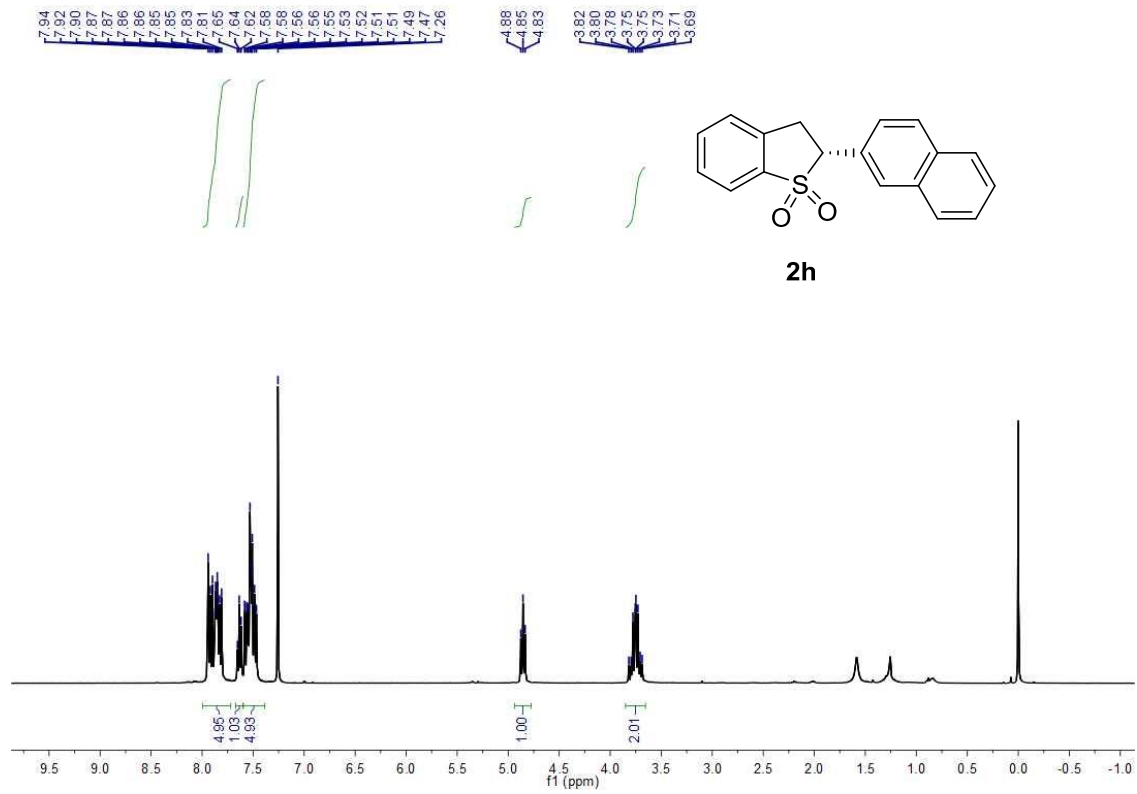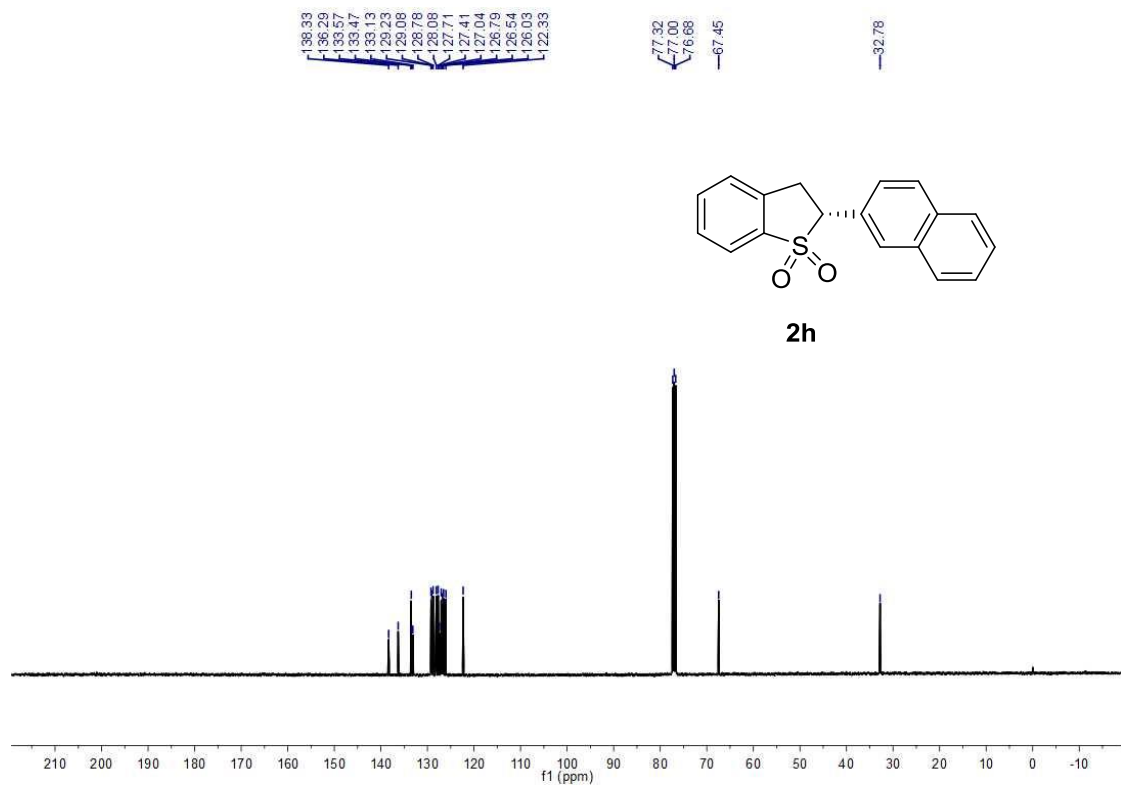



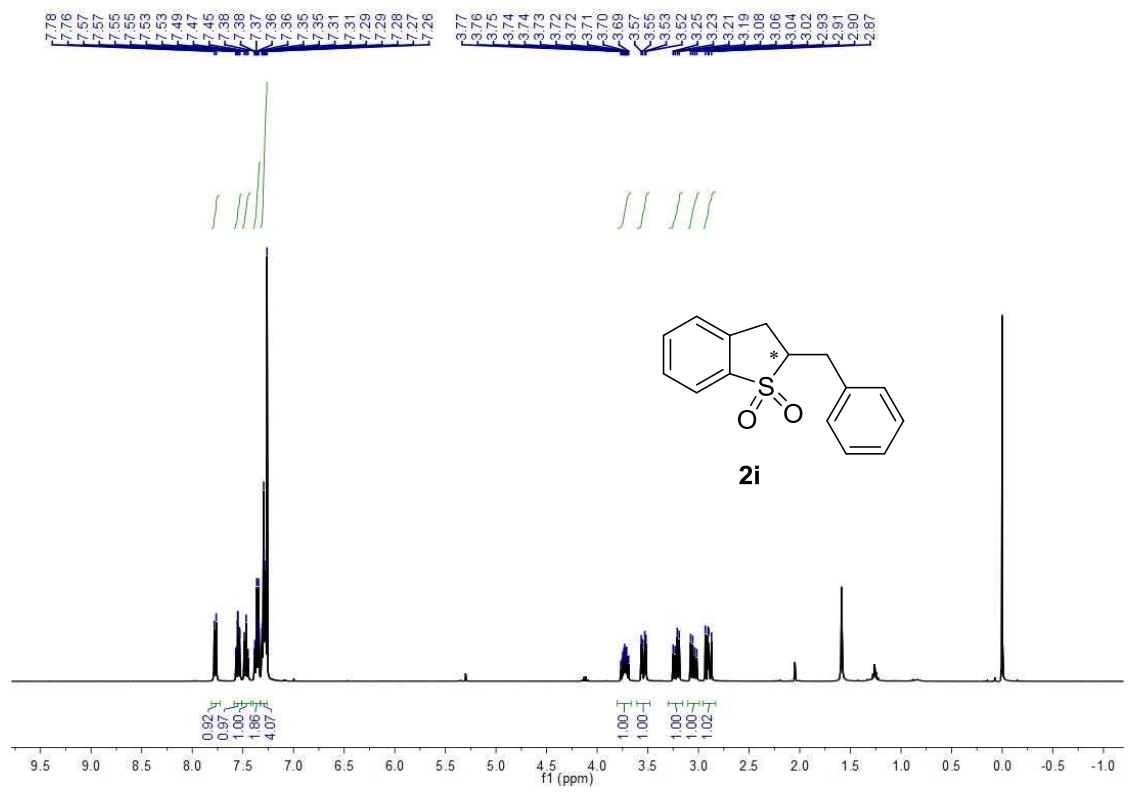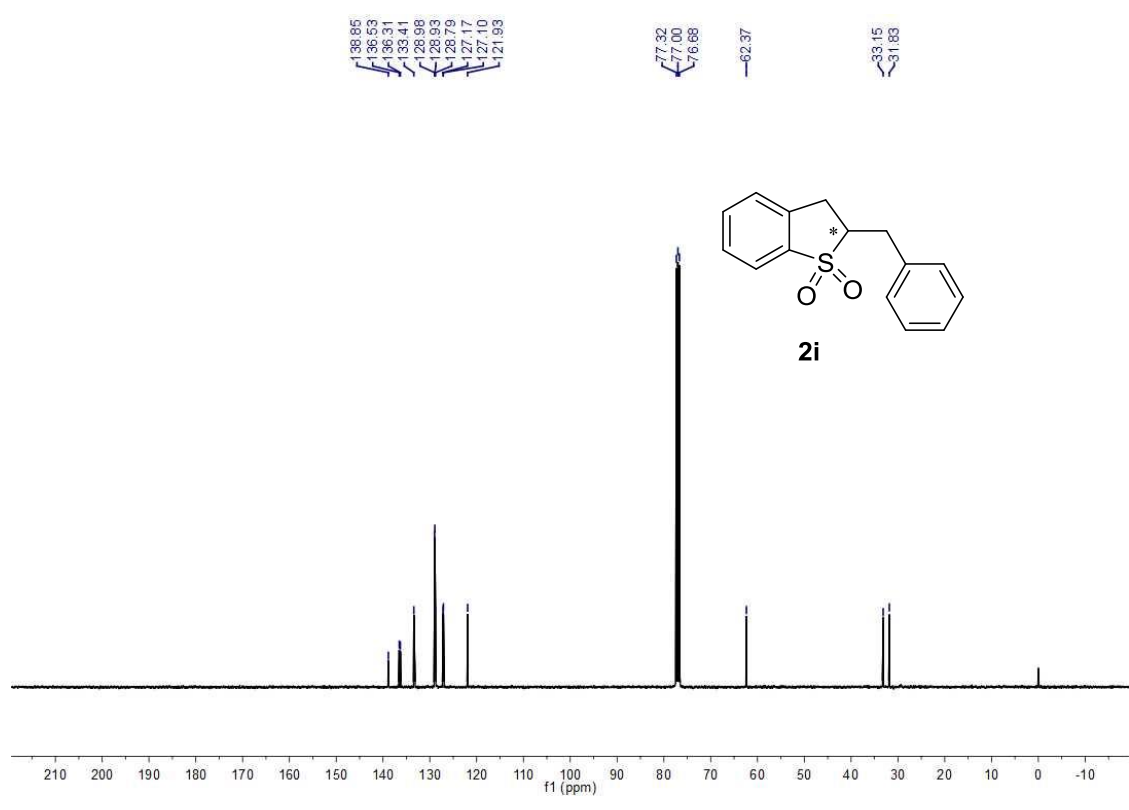

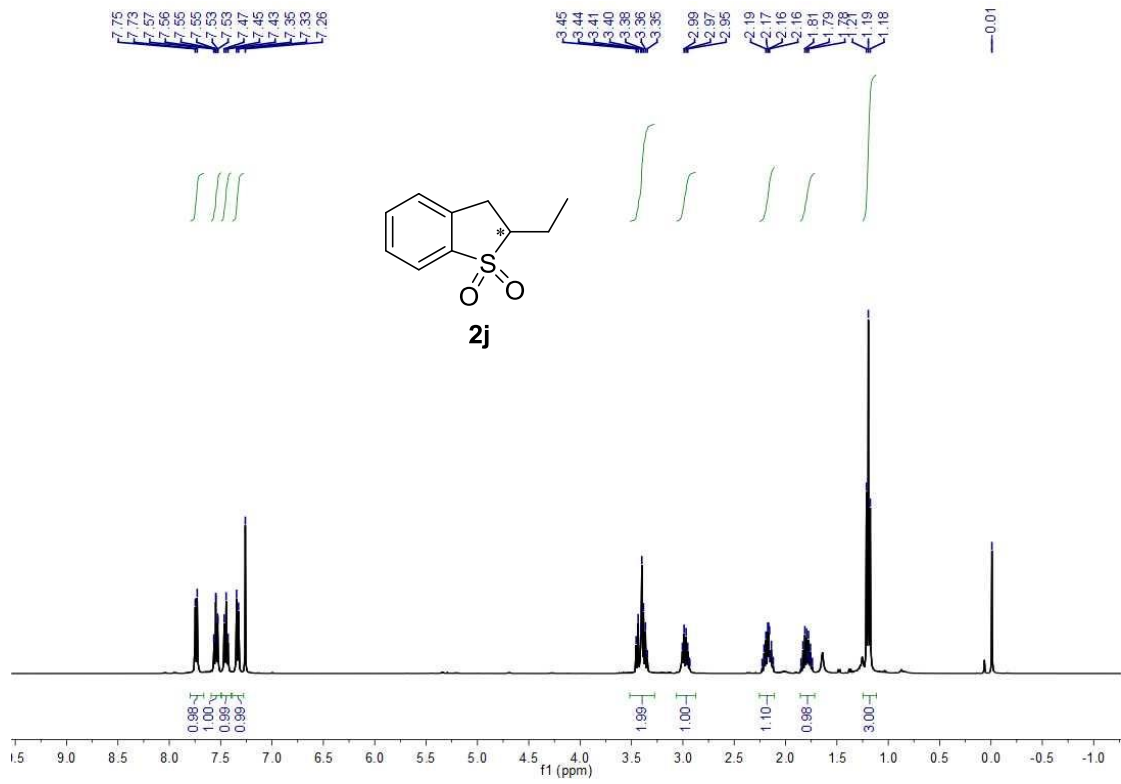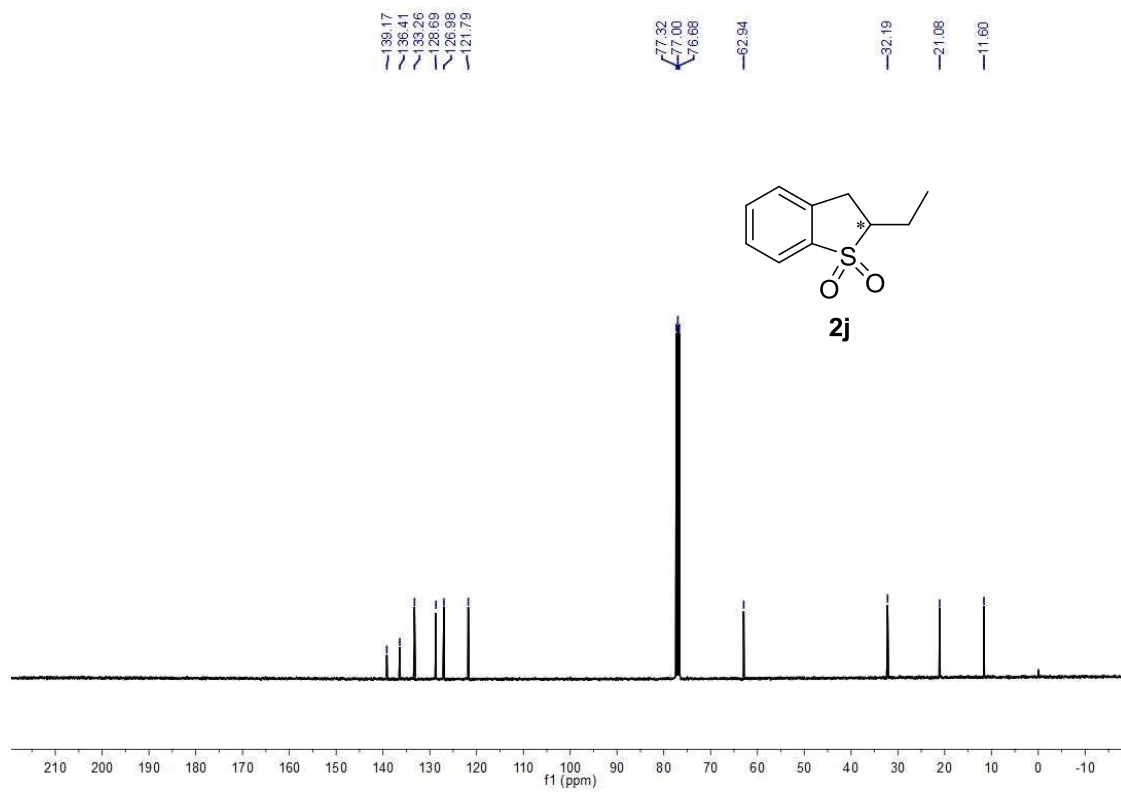

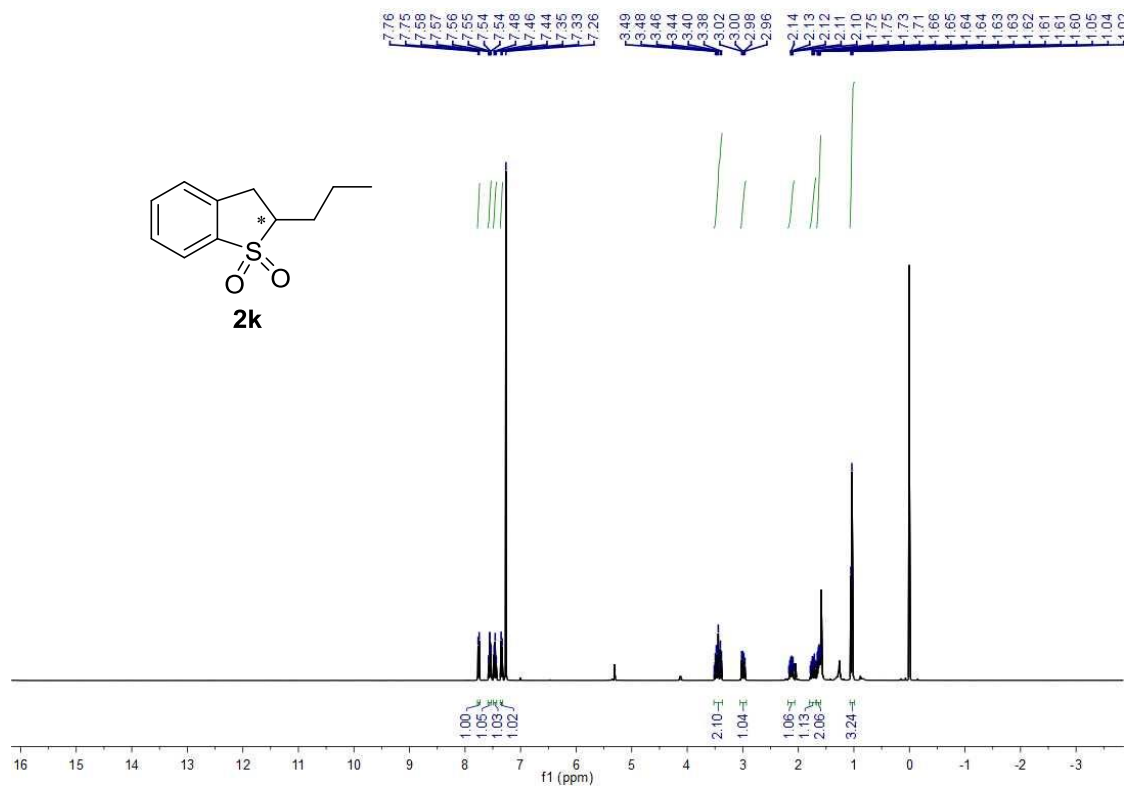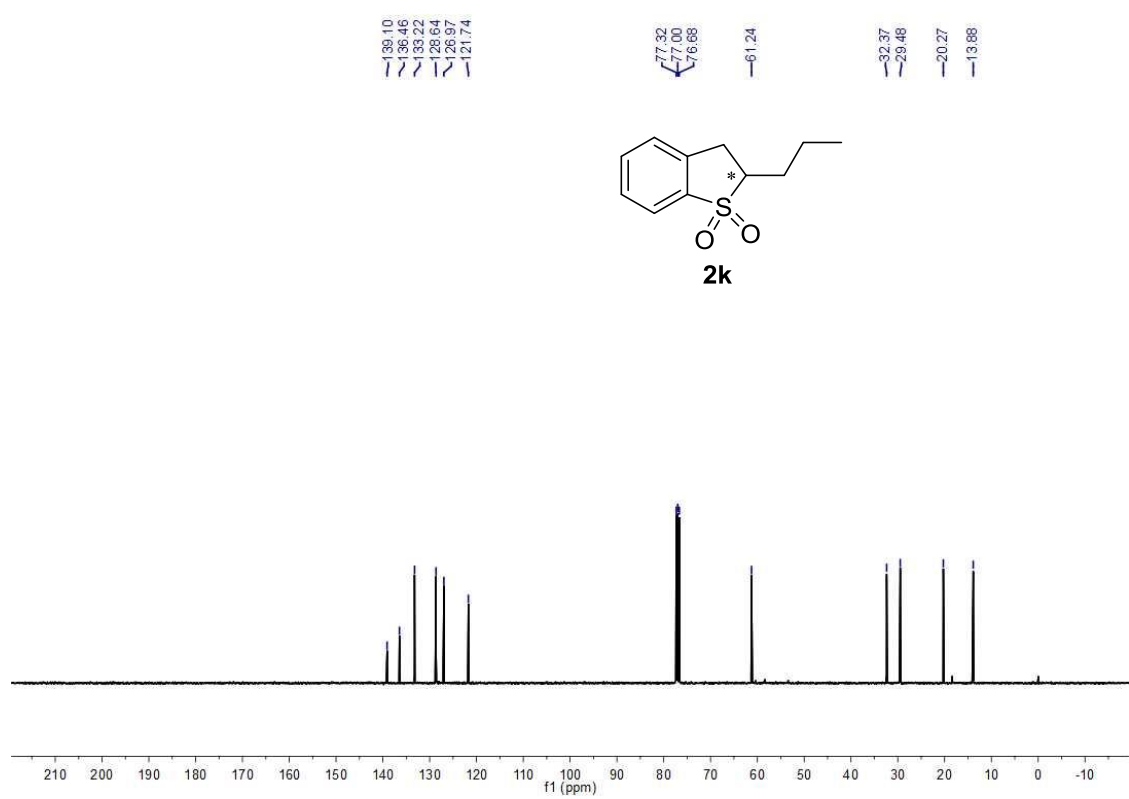

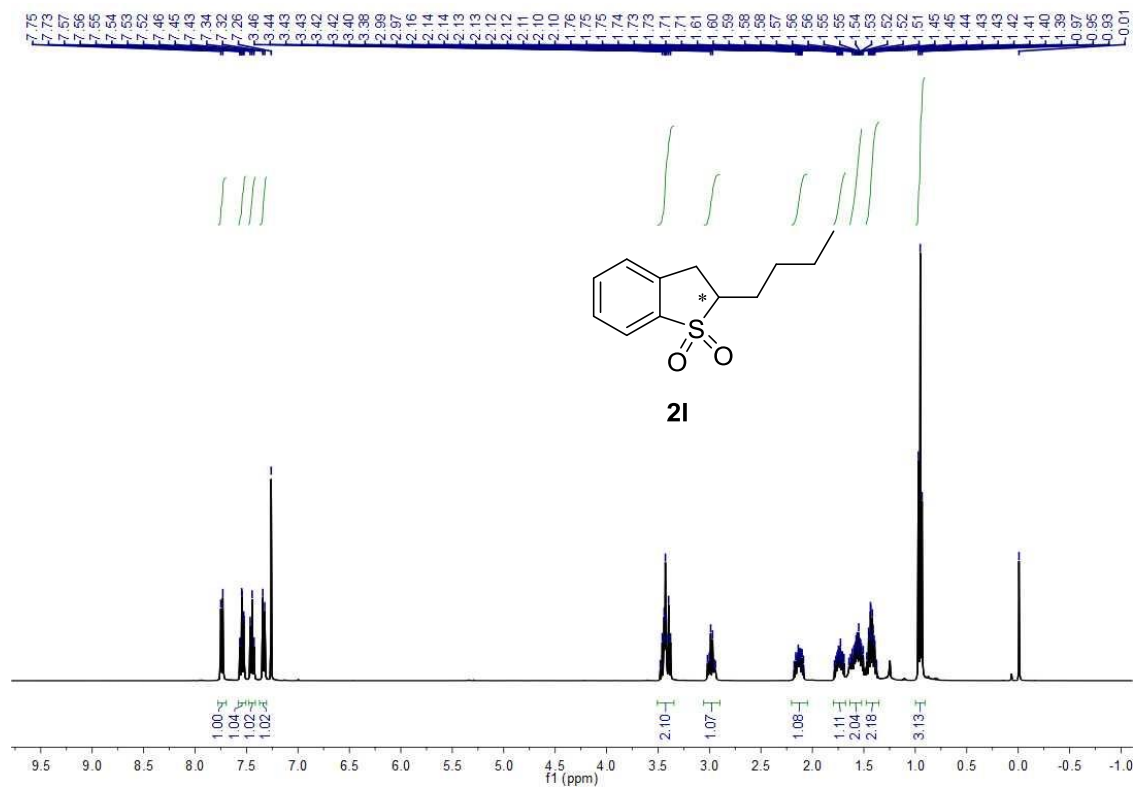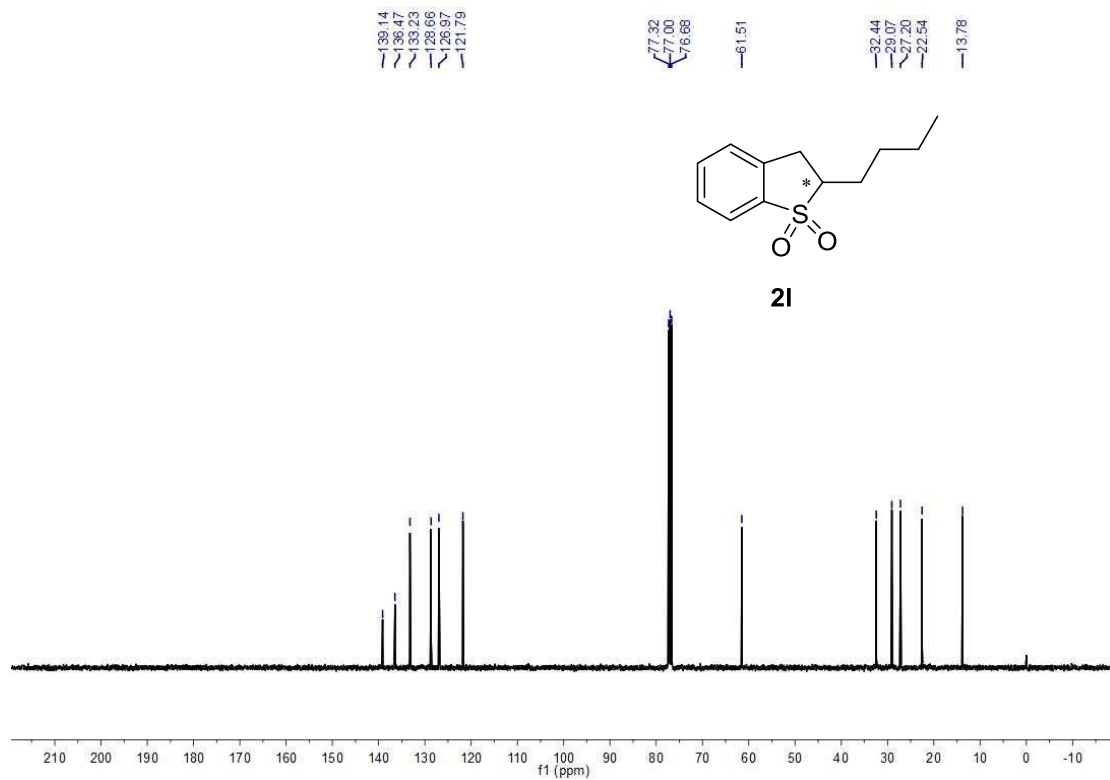

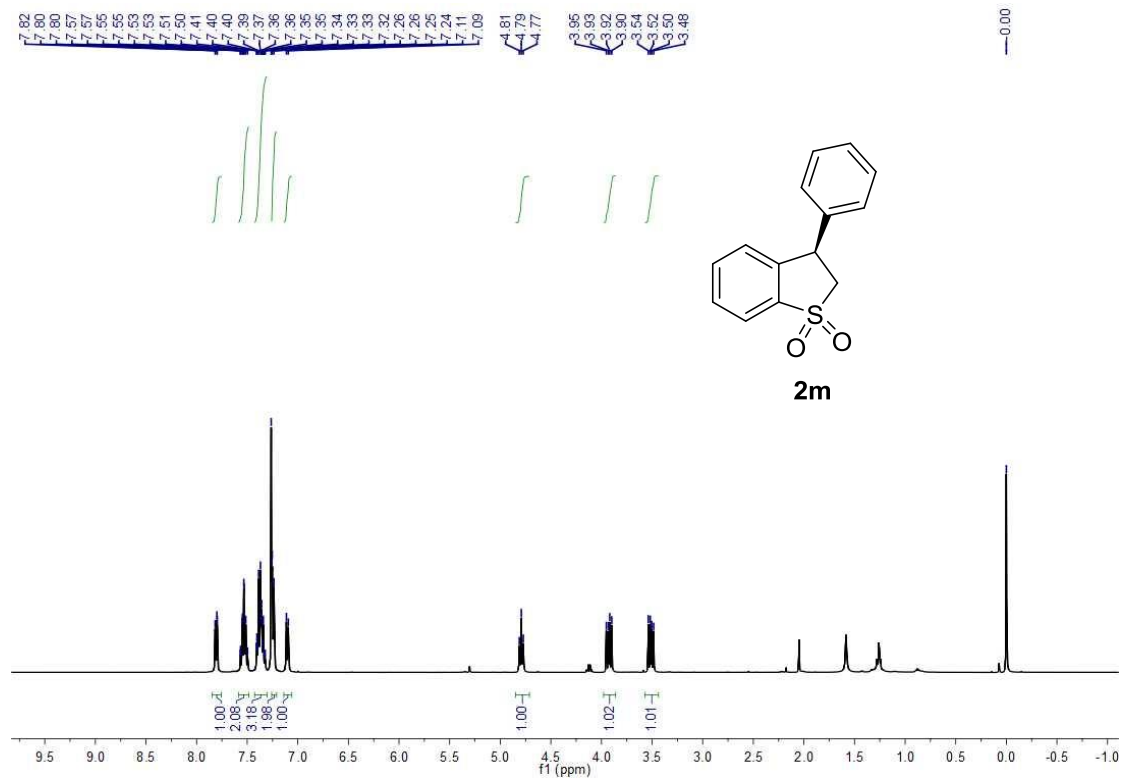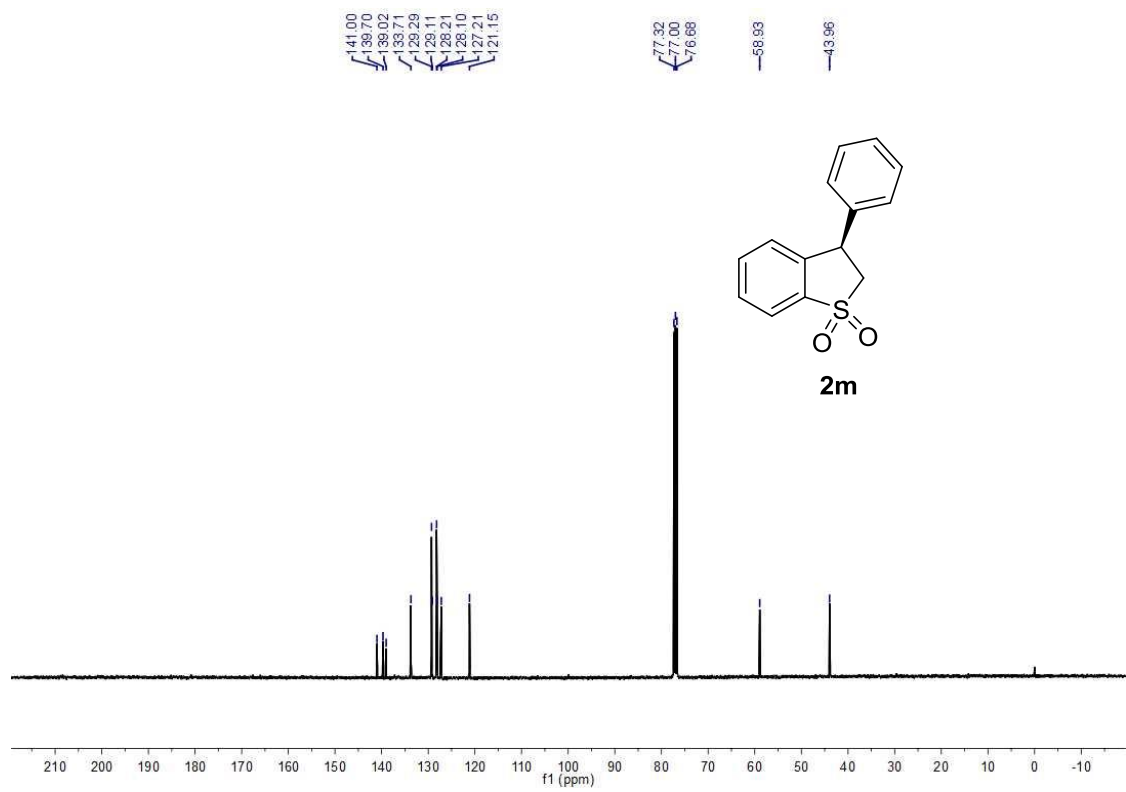

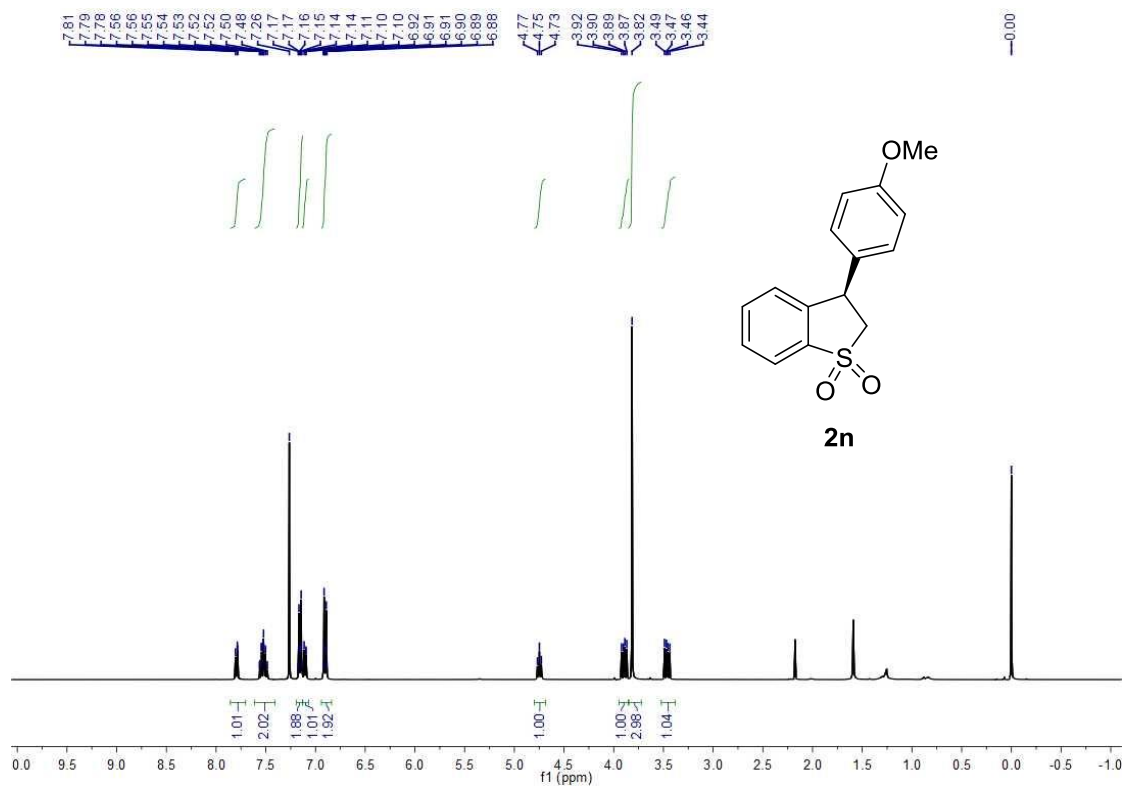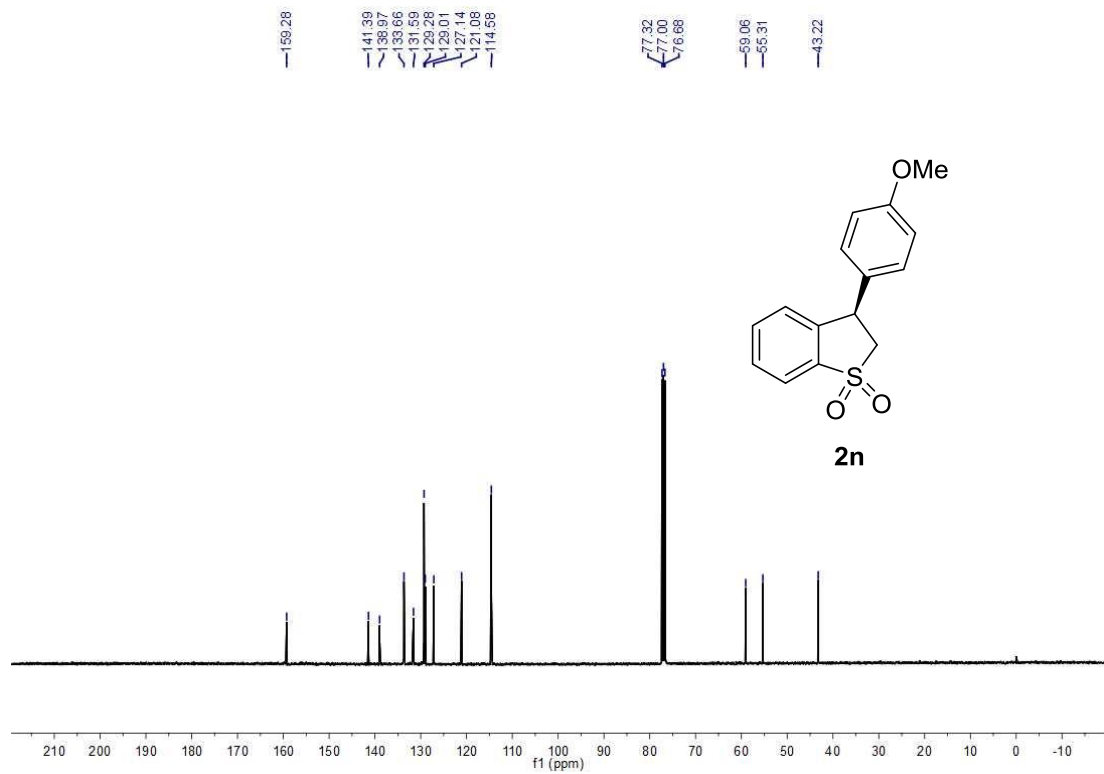

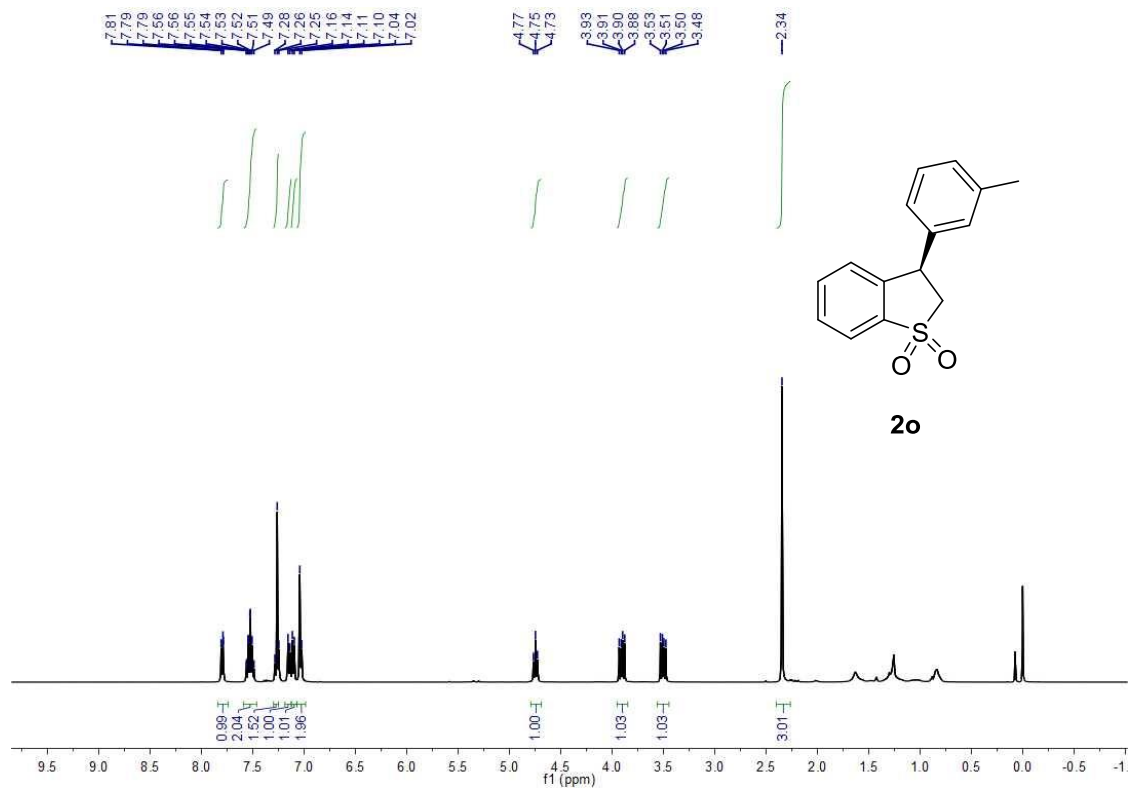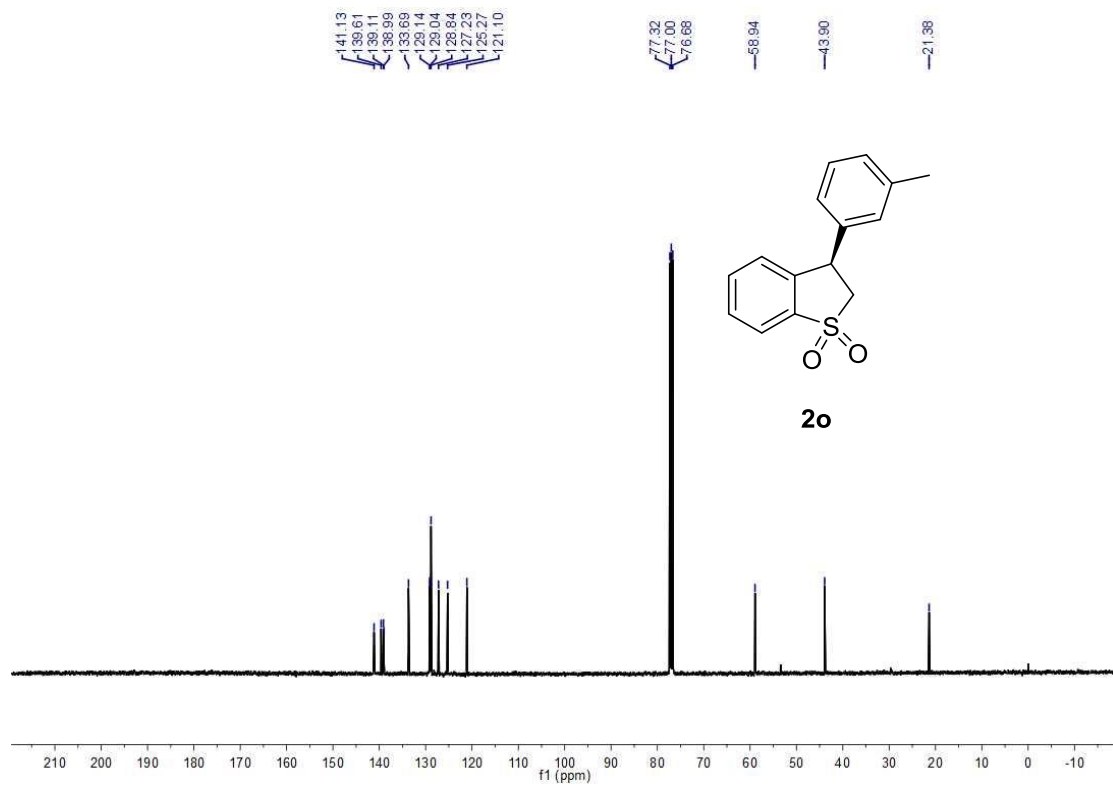

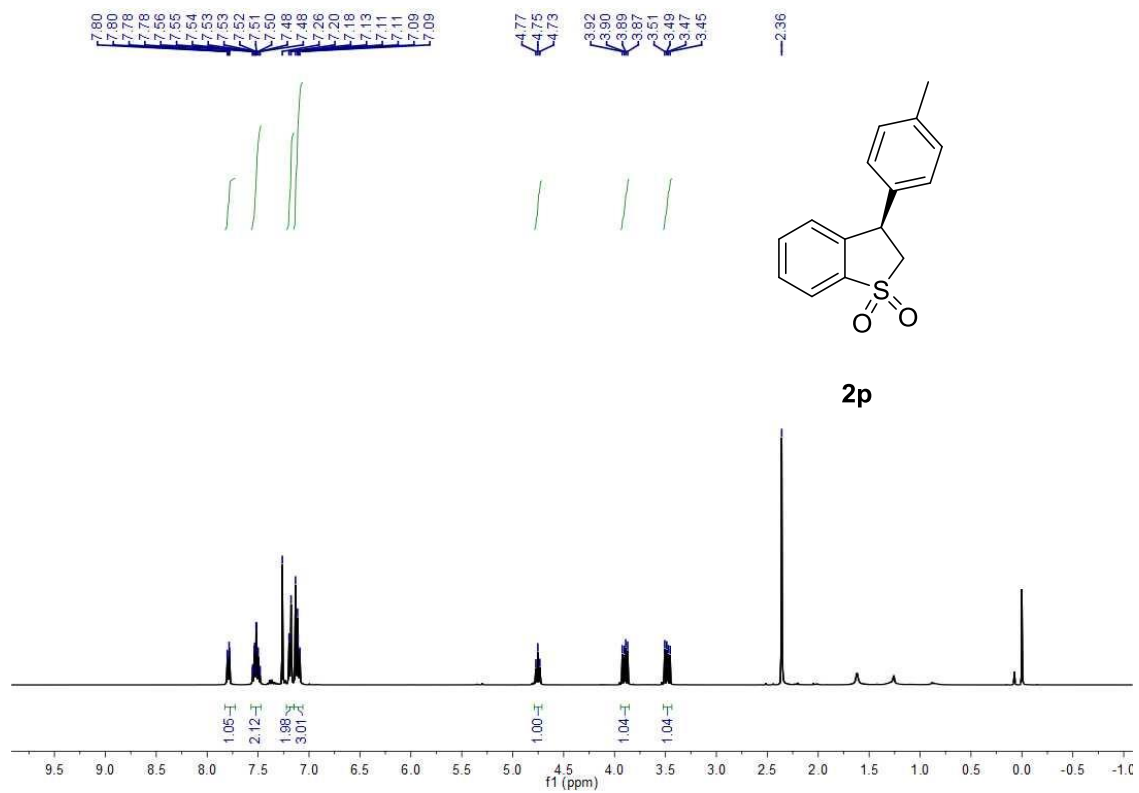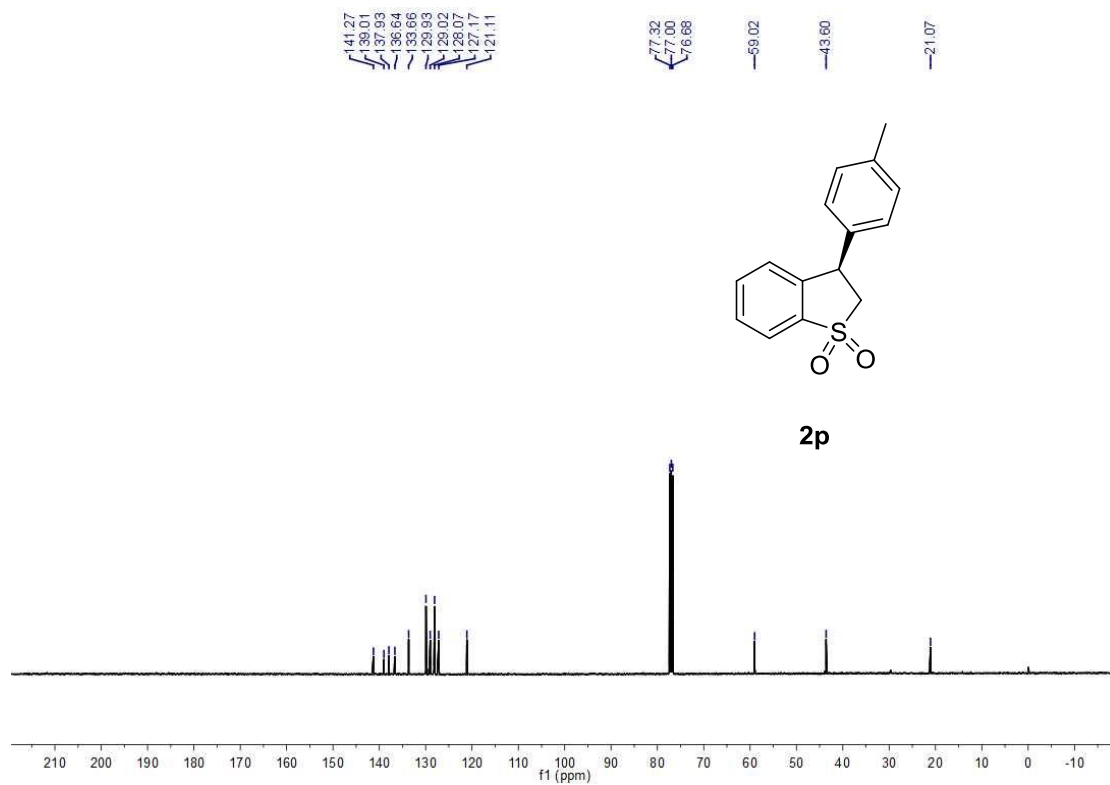



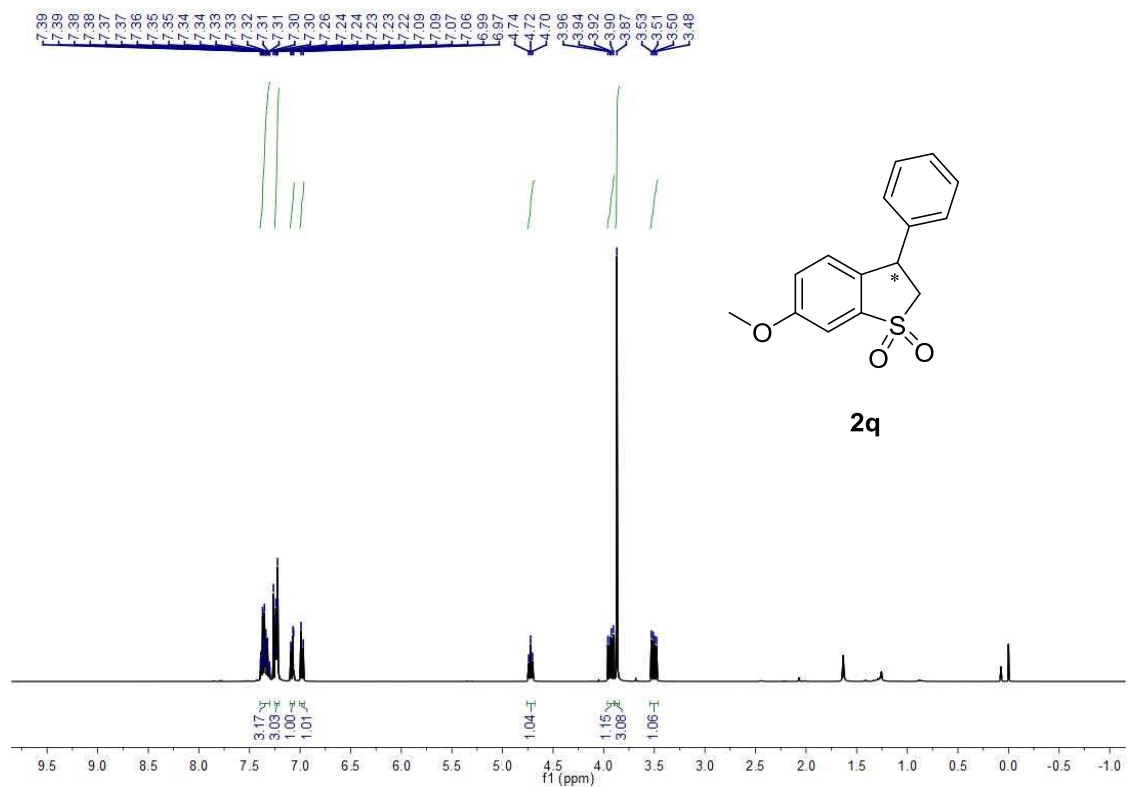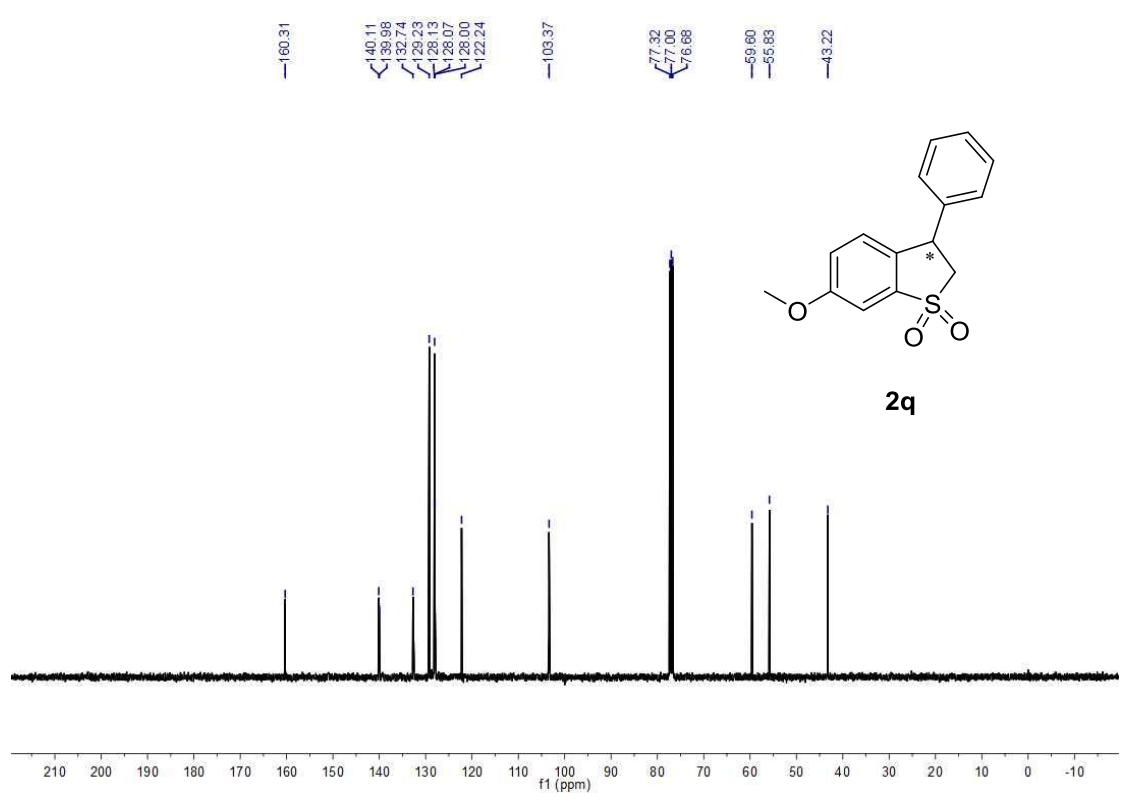

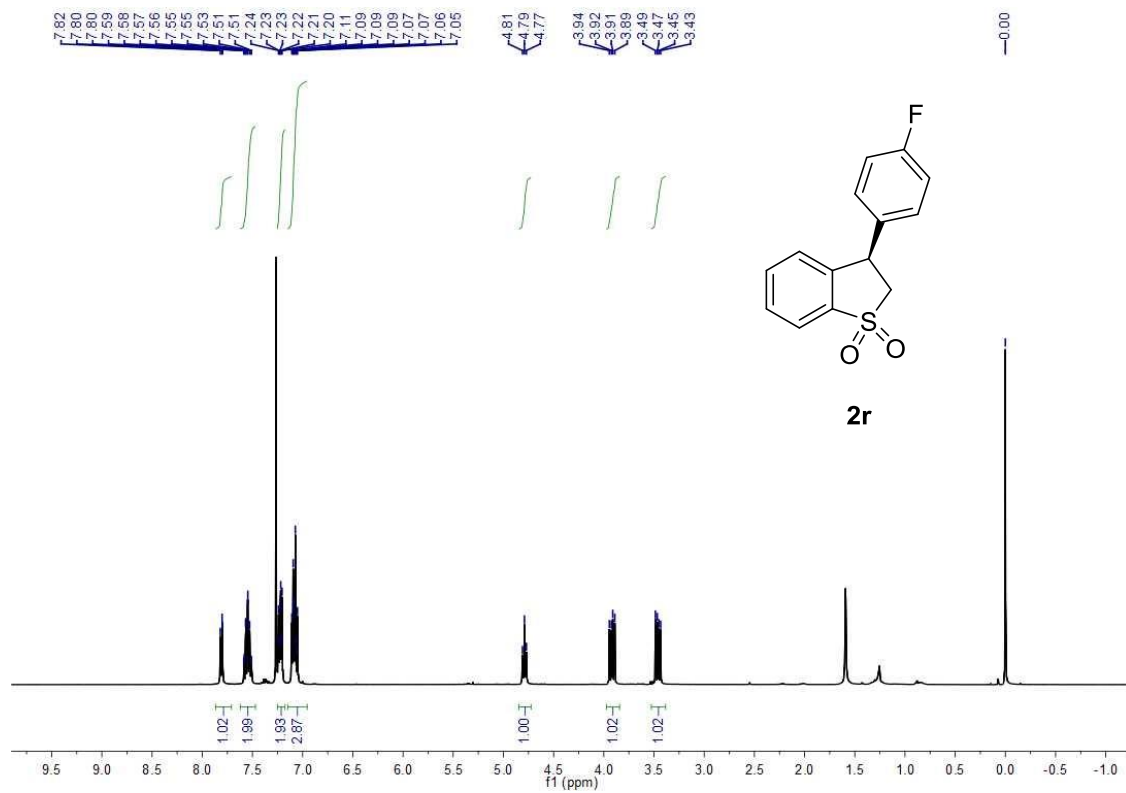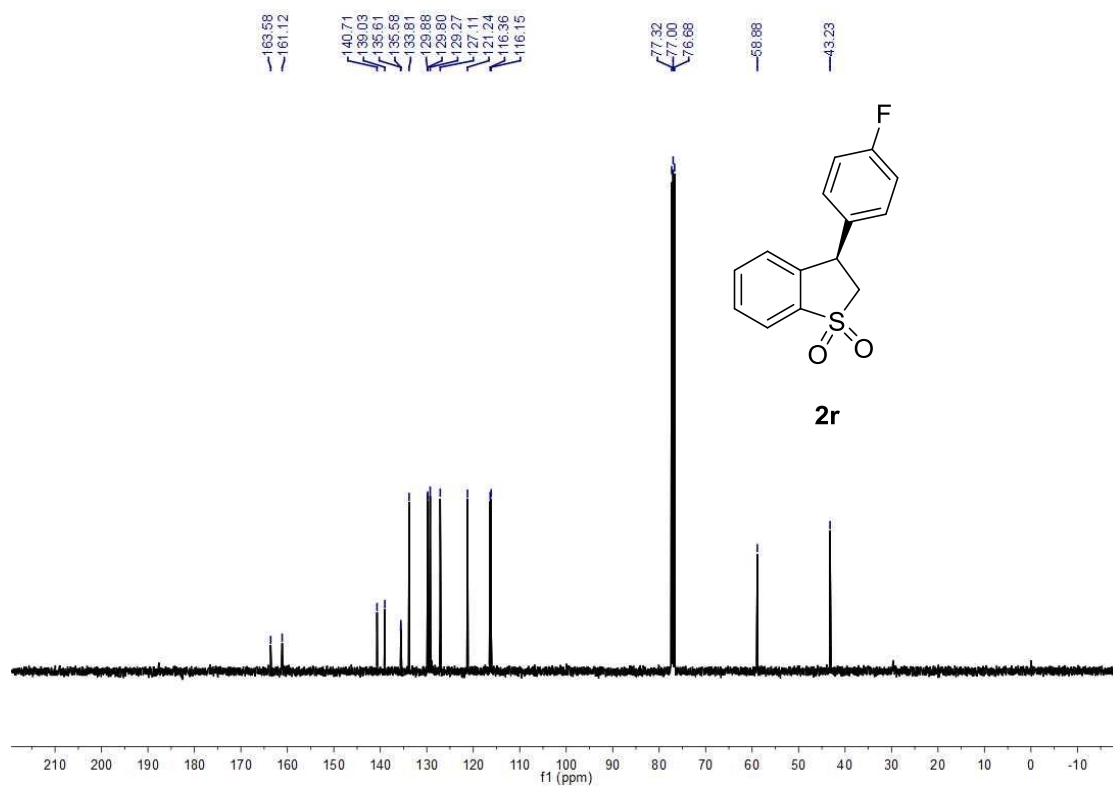

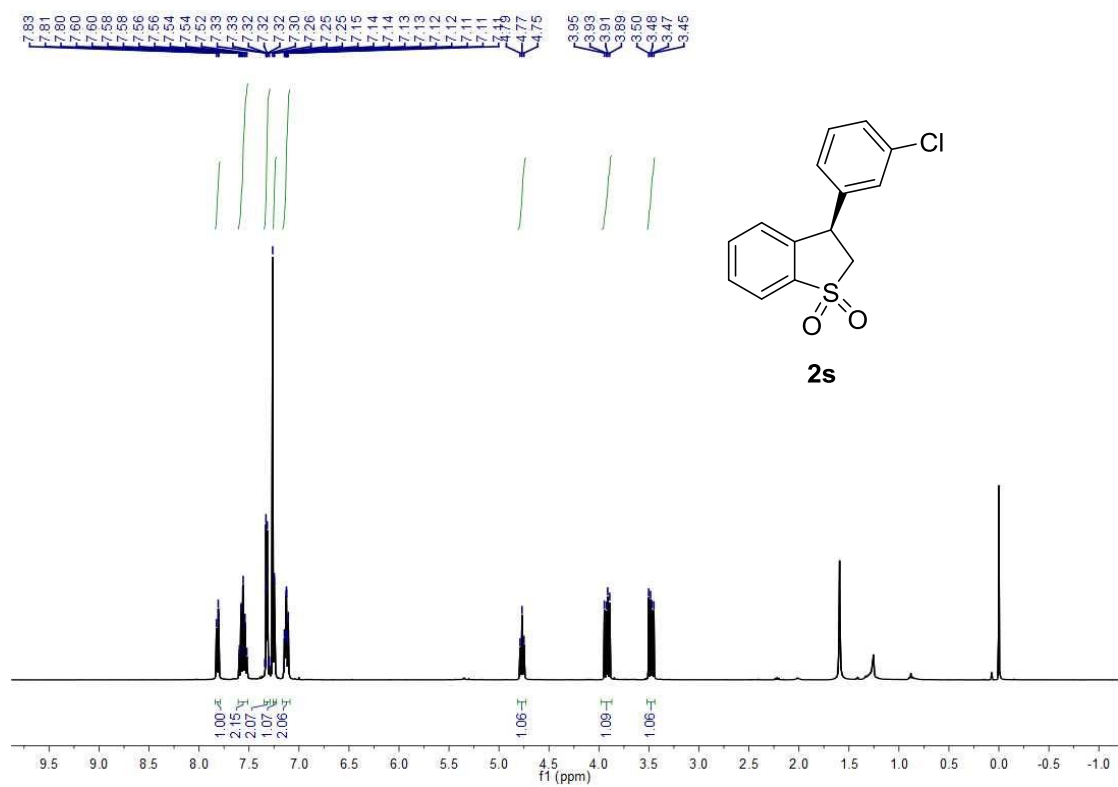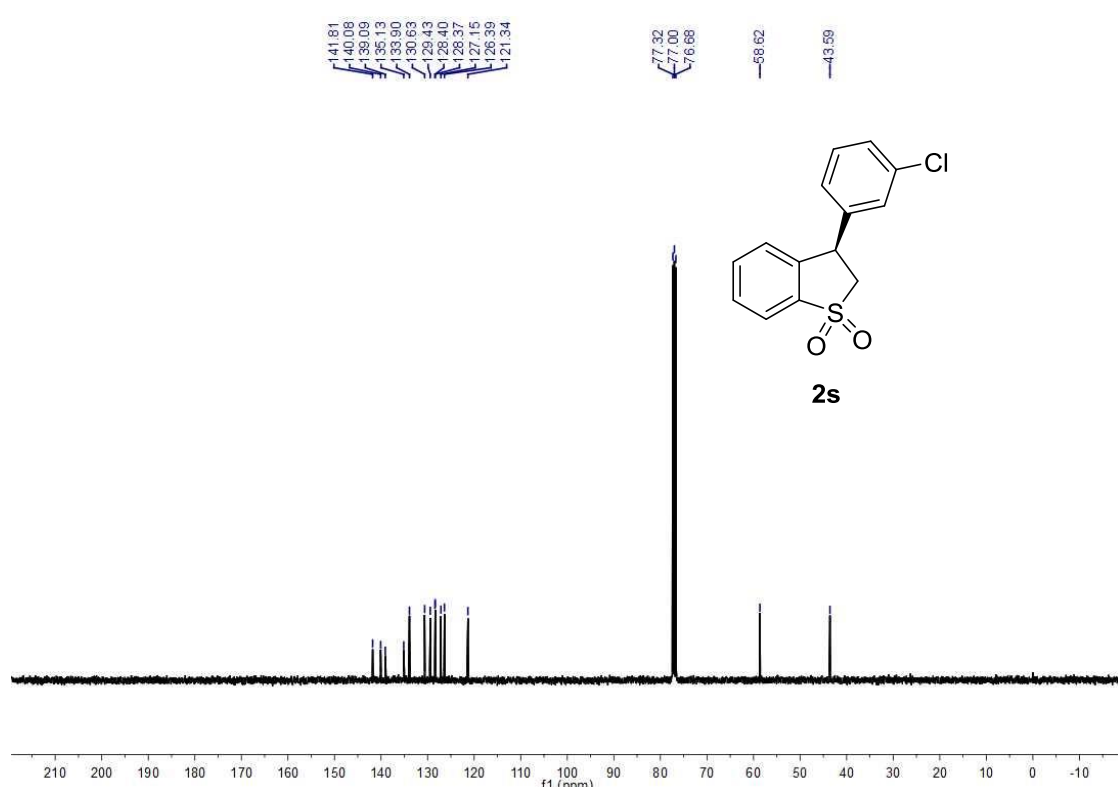

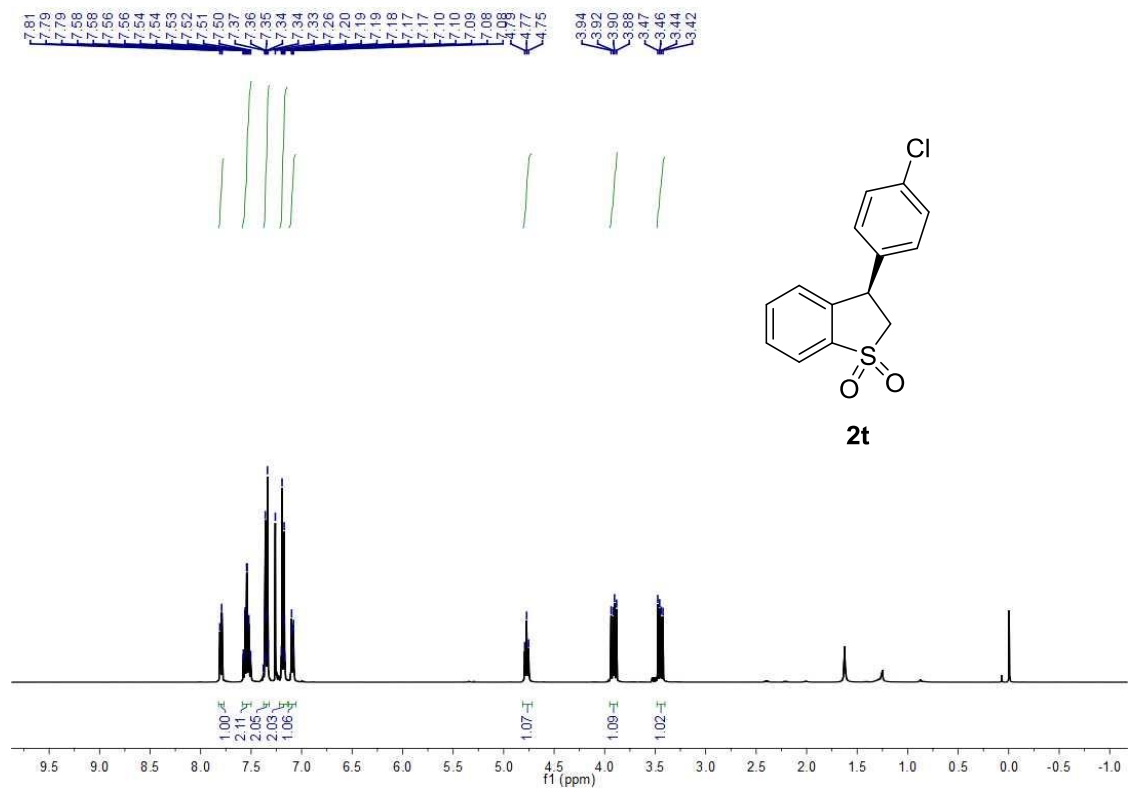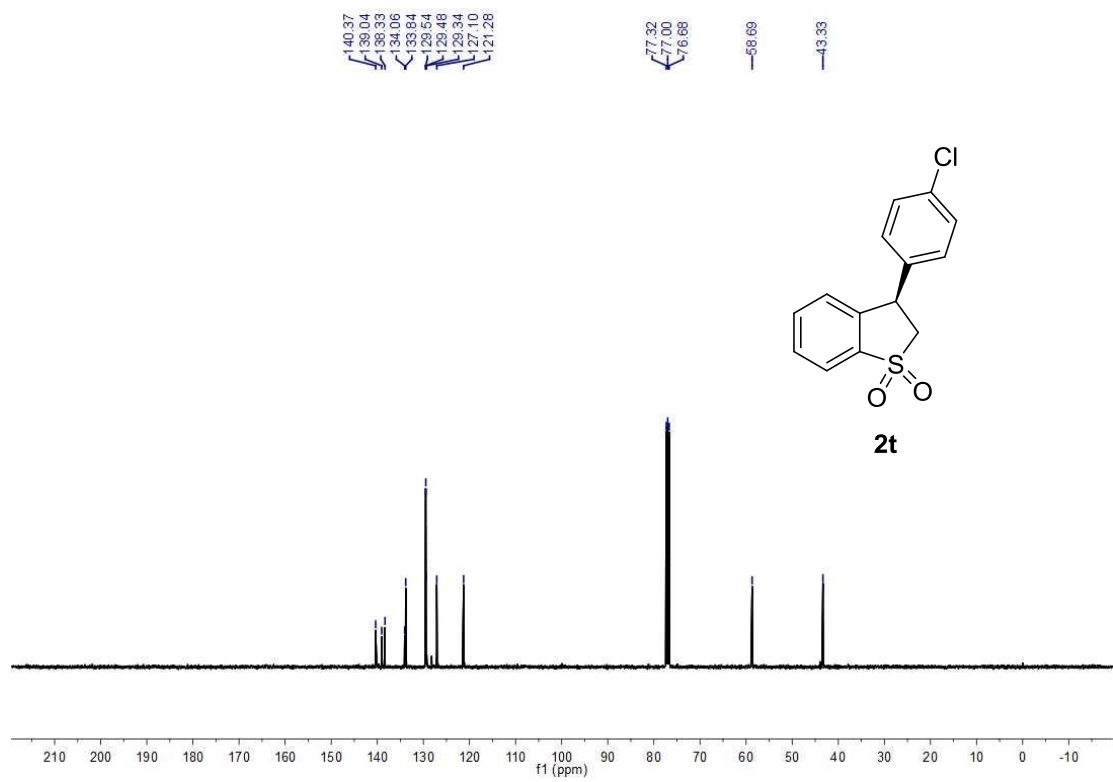

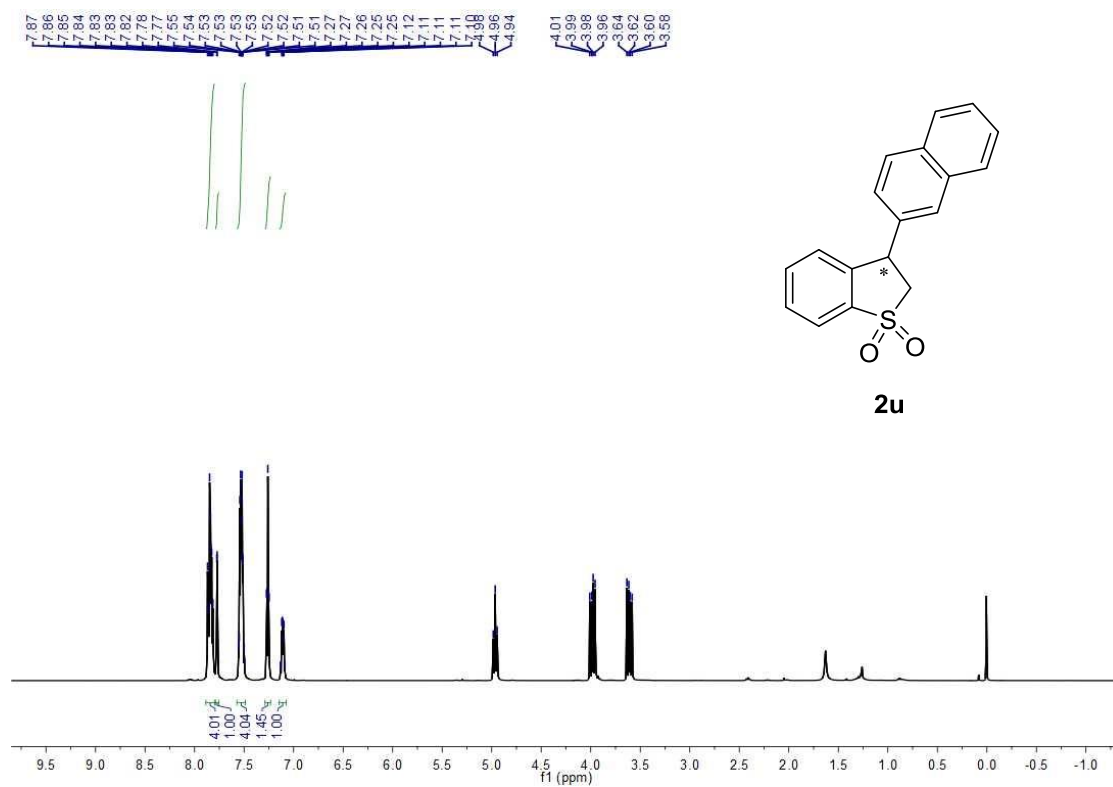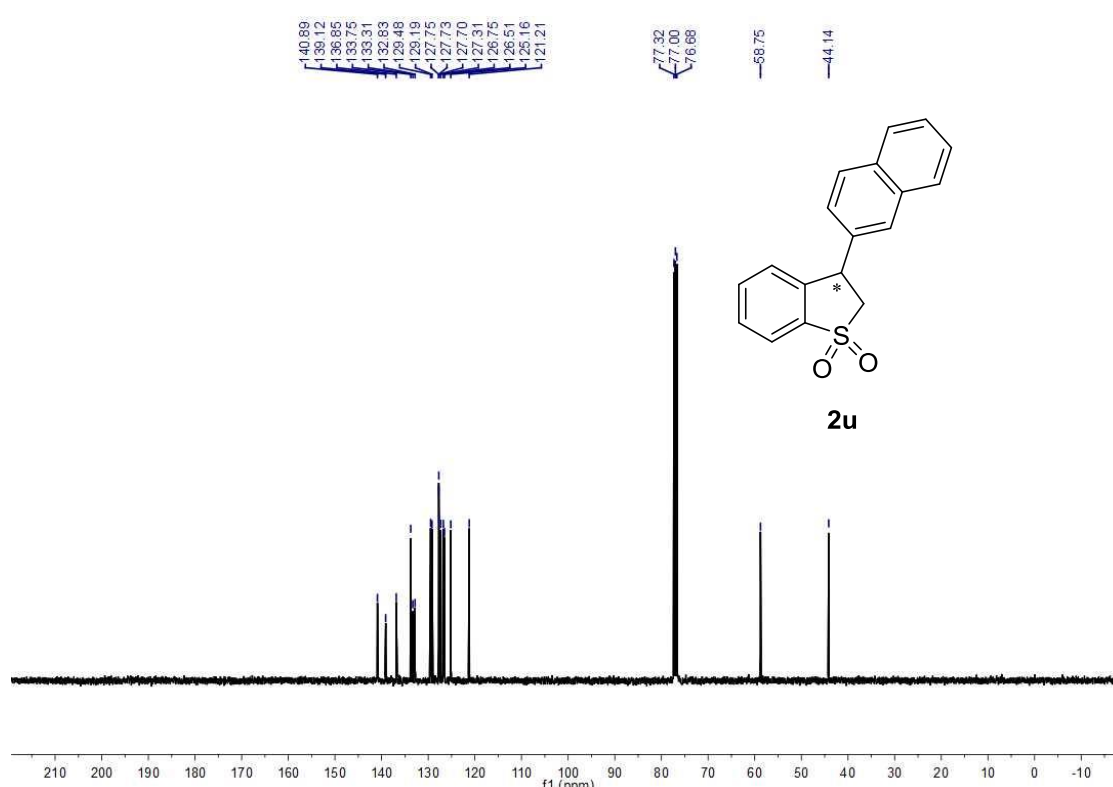

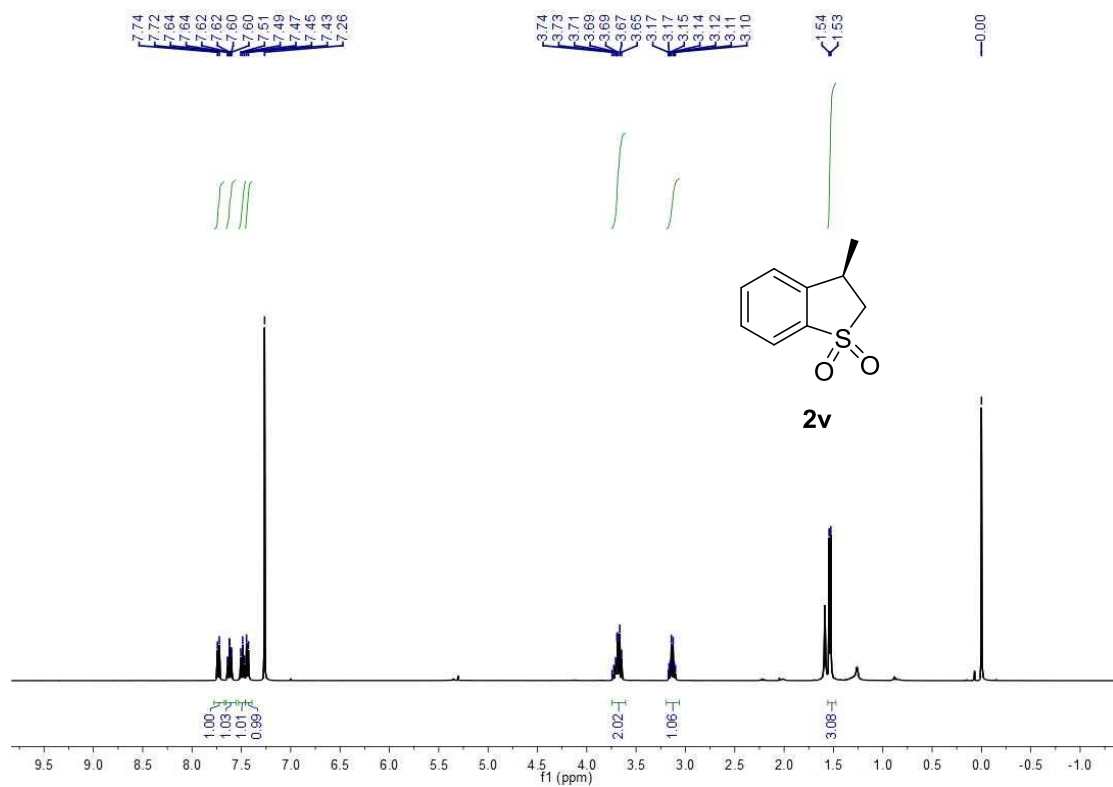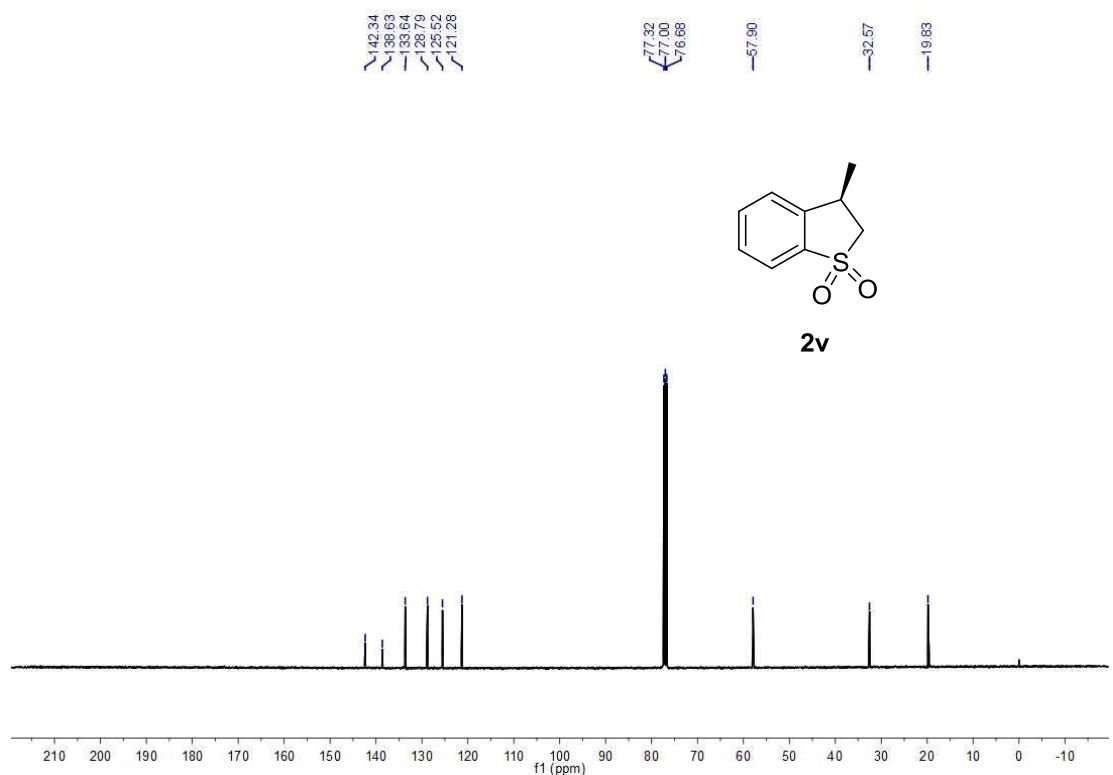

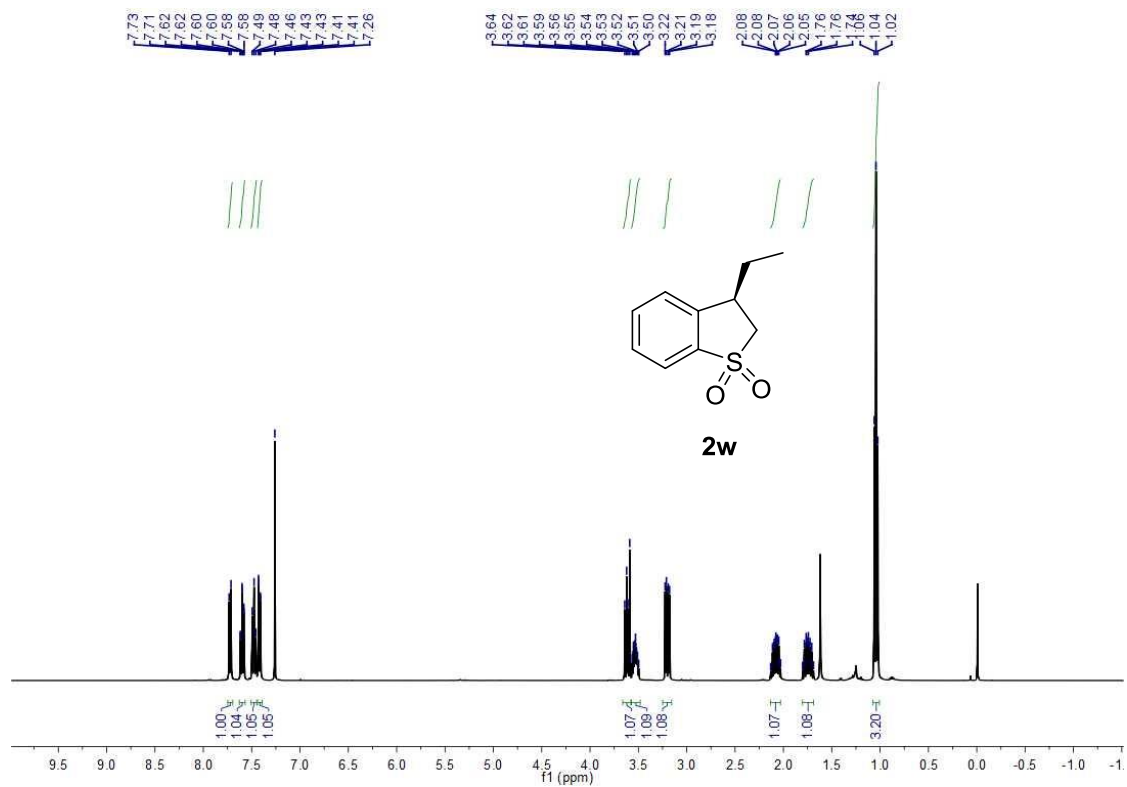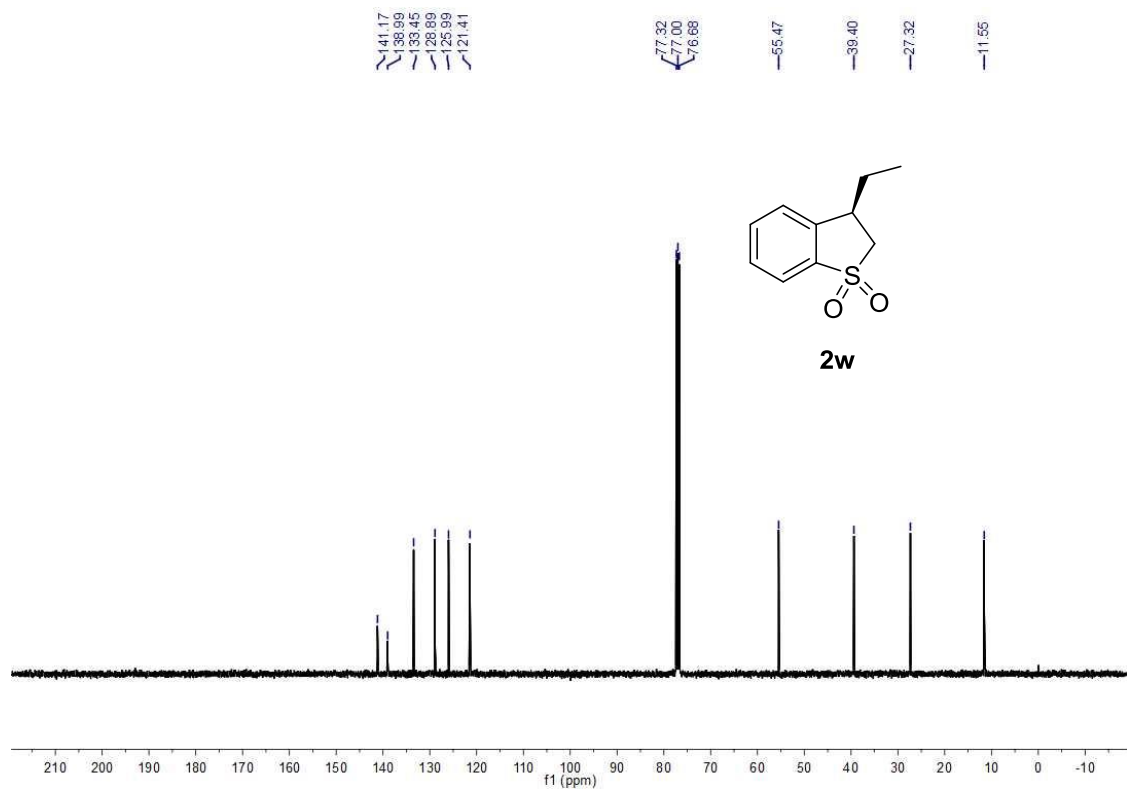

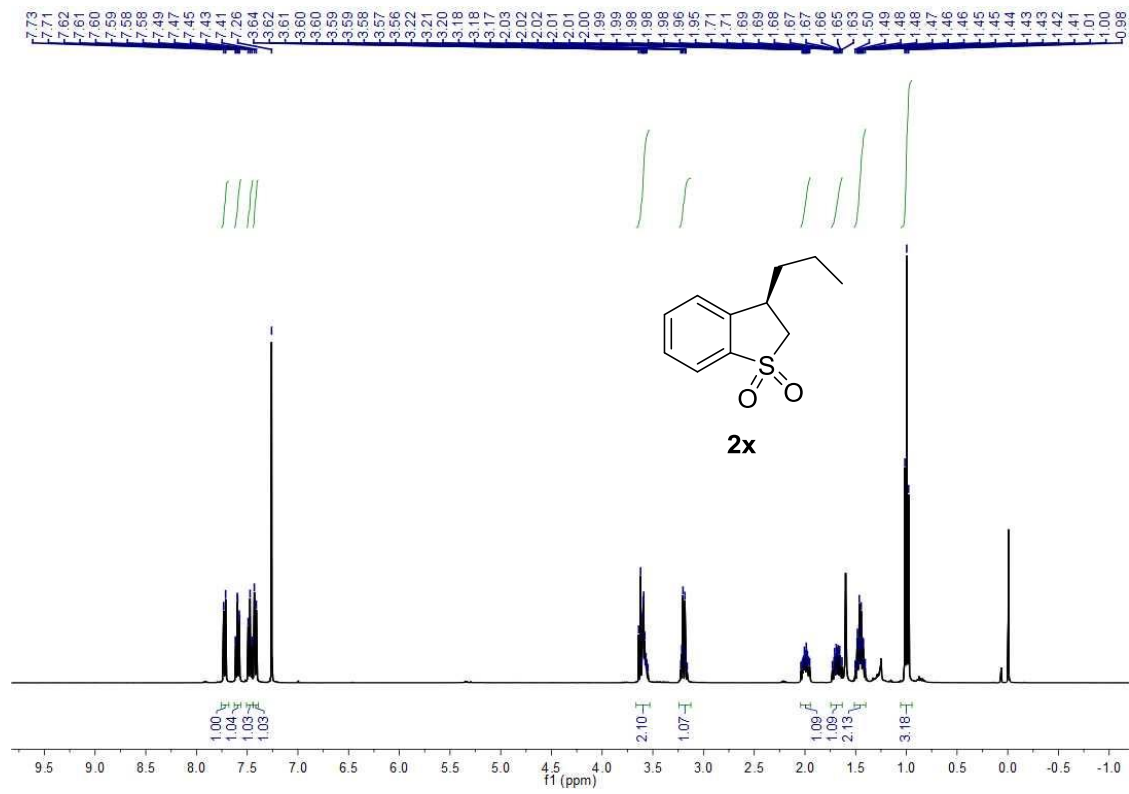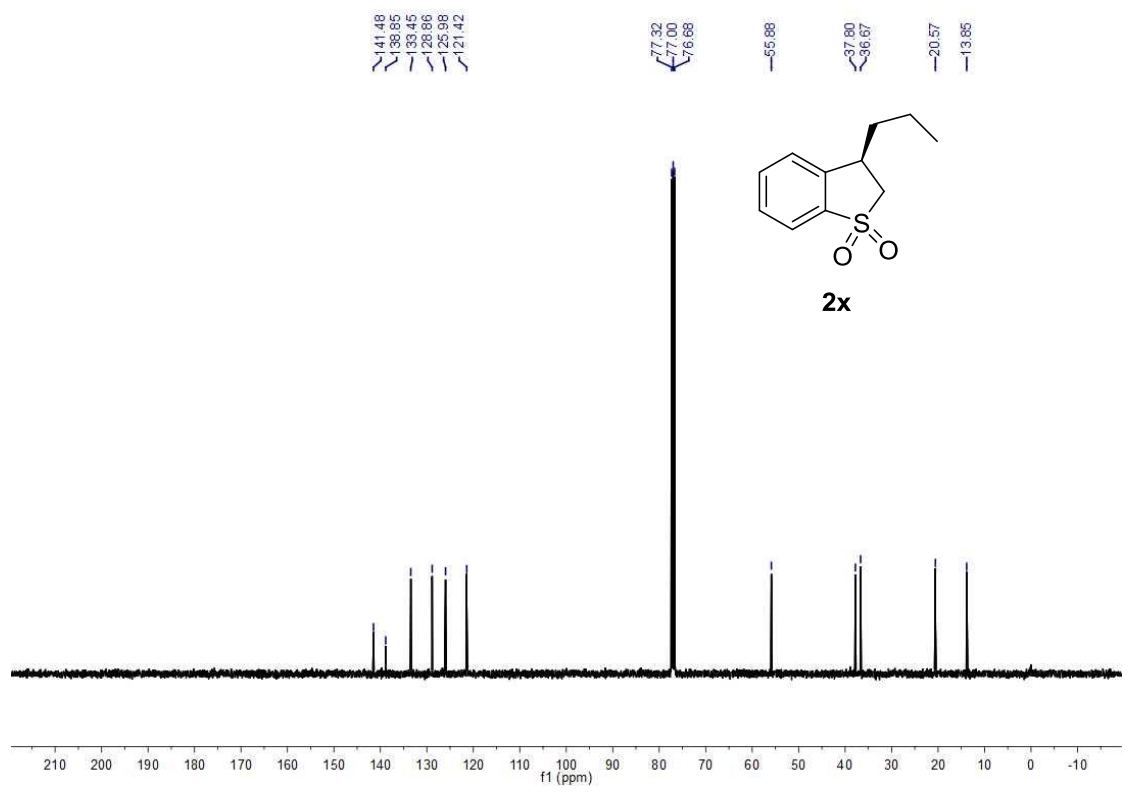



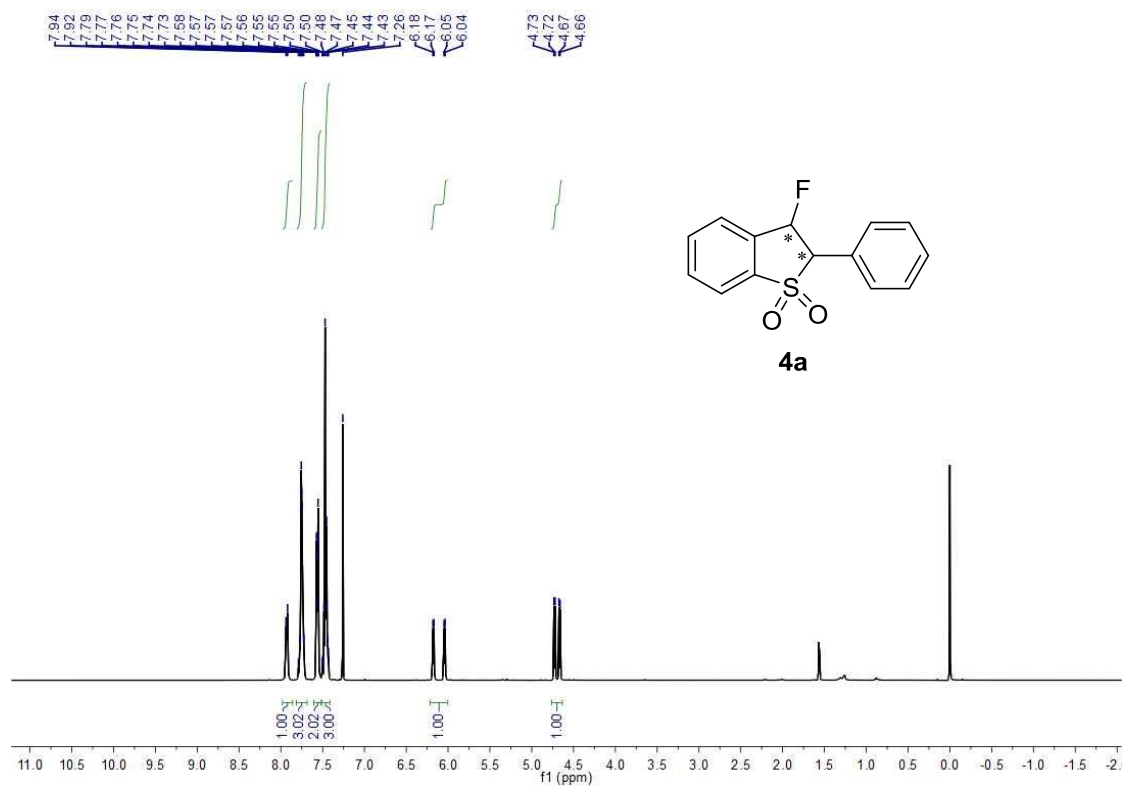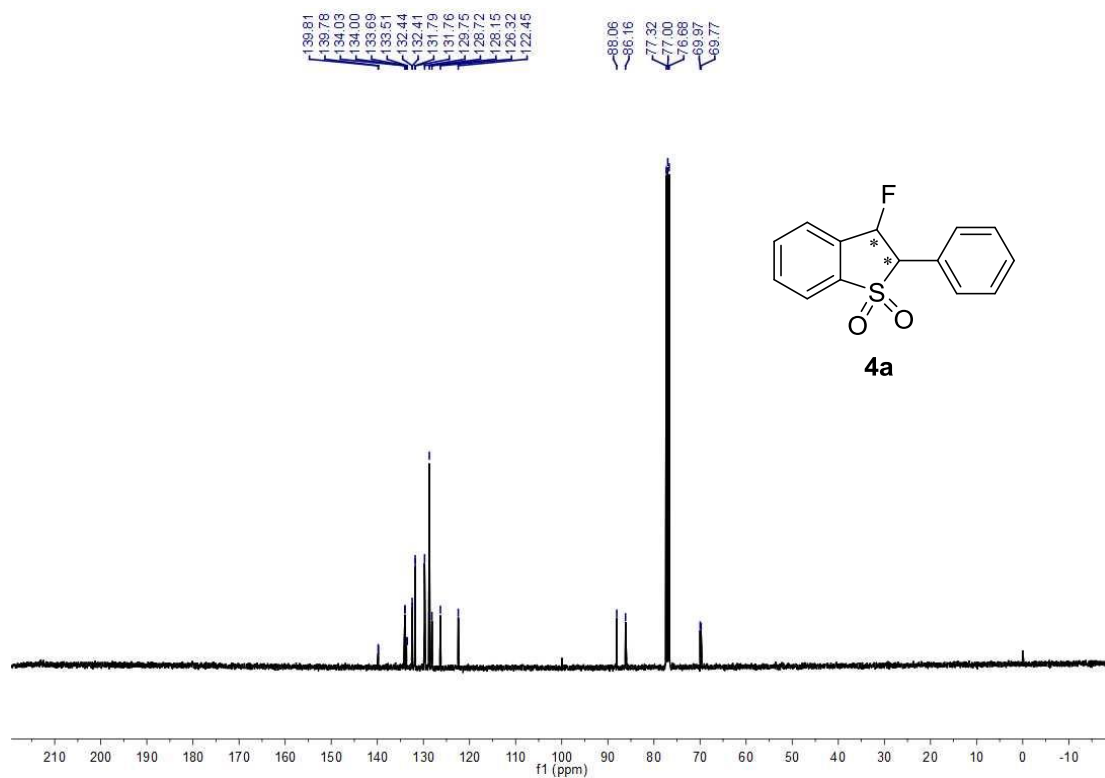

## 9. HPLC spectra

### HPLC of racemic-2a

Data File D:\DATA\LGY\LGY-1-43\LGY-1-43 2018-09-11 14-49-28\011-0301.D  
 Sample Name: LGY-1-43-1

```

=====
Acq. Operator   :                               Seq. Line :    3
Acq. Instrument : Instrument 1                   Location  : Vial 11
Injection Date  : 9/11/2018 3:15:08 PM          Inj       :    1
                                                    Inj Volume: 5.000 µl

Acq. Method     : D:\DATA\LGY\LGY-1-43\LGY-1-43 2018-09-11 14-49-28\VWD-AS(1-6)-80-20-1ML-5UL
                  -220NM-80MIN.M
Last changed    : 9/11/2018 4:37:46 PM
                  (modified after loading)
Analysis Method : D:\METHOD\LG\VWD-AD(1-2)-99-1-0.2ML-2UL-220NM-10MIN.M
Last changed    : 9/12/2018 9:50:51 AM
                  (modified after loading)
Additional Info : Peak(s) manually integrated
  
```

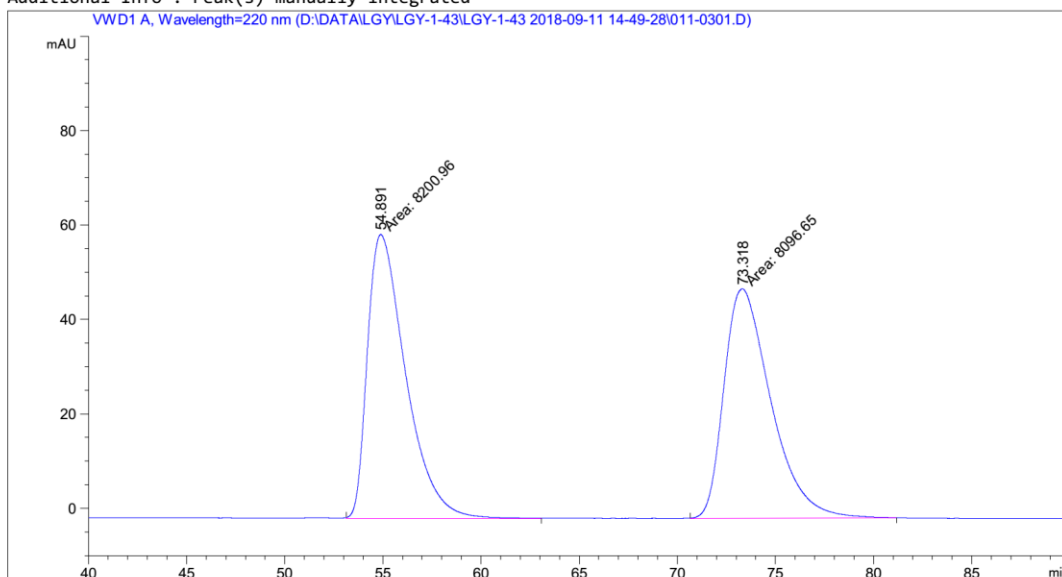

#### Area Percent Report

```

Sorted By      :      Retention Time
Multiplier     :      1.0000
Dilution       :      1.0000
Use Multiplier & Dilution Factor with ISTDs
  
```

Signal 1: VWD1 A, Wavelength=220 nm

| Peak # | RetTime [min] | Sig | Type | Area [mAU*s] | Height [mAU] | Area %  |
|--------|---------------|-----|------|--------------|--------------|---------|
| 1      | 54.891        | 1   | MM   | 8200.96387   | 60.20780     | 50.3200 |
| 2      | 73.318        | 1   | MP   | 8096.65479   | 48.65597     | 49.6800 |

Totals :                    1.62976e4    108.86377

# HPLC of 2a

Data File E:\DATA\LG1\LG1-1-106\LG1-1-106 2018-02-03 16-42-19\023-0501.D  
 Sample Name: LGY-1-106-3

```

=====
Acq. Operator   : SYSTEM                      Seq. Line :    5
Acq. Instrument : 1260HPLC-VWD                Location  : Vial 23
Injection Date  : 2/3/2018 8:47:02 PM        Inj       :    1
                                           Inj Volume: 5.000 µl

Acq. Method     : E:\DATA\LG1\LG1-1-106\LG1-1-106 2018-02-03 16-42-19\VWD-AS(1-6)-80-20-1ML-
                    5UL-220NM-90MIN.M
Last changed    : 2/3/2018 4:42:20 PM by SYSTEM
Analysis Method : E:\DATA\LG1\LG1-1-106\LG1-1-106 2018-02-03 16-42-19\VWD-AS(1-6)-80-20-1ML-
                    5UL-220NM-90MIN.M (Sequence Method)
Last changed    : 9/14/2018 3:37:19 PM by SYSTEM
                    (modified after loading)
Additional Info  : Peak(s) manually integrated
  
```

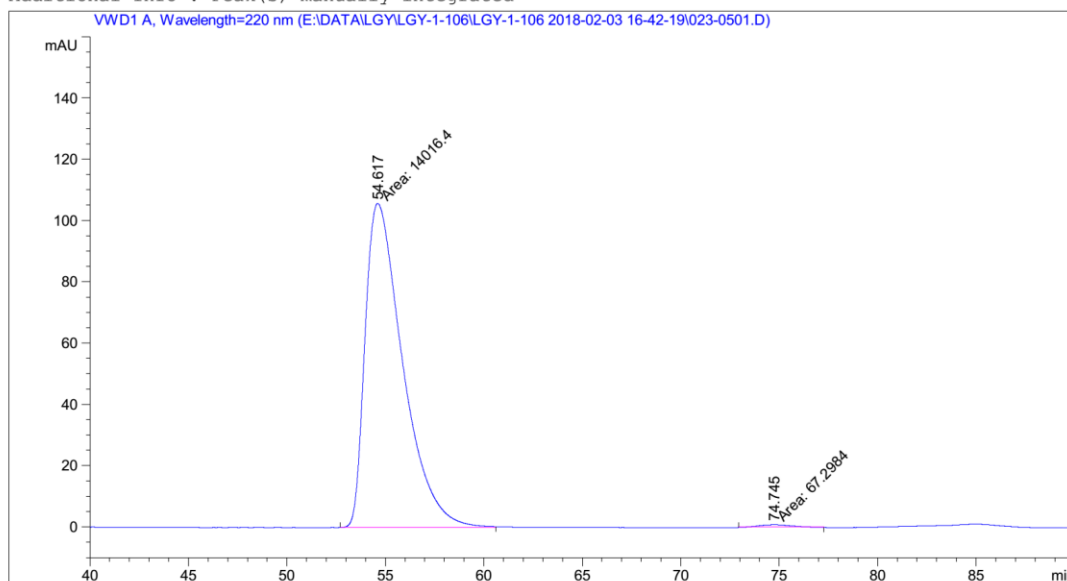

## Area Percent Report

```

Sorted By      : Signal
Multiplier     : 1.0000
Dilution       : 1.0000
Do not use Multiplier & Dilution Factor with ISTDs
  
```

Signal 1: VWD1 A, Wavelength=220 nm

| Peak # | RetTime [min] | Type | Width [min] | Area [mAU*s] | Height [mAU] | Area %  |
|--------|---------------|------|-------------|--------------|--------------|---------|
| 1      | 54.617        | MM   | 2.2089      | 1.40164e4    | 105.75460    | 99.5222 |
| 2      | 74.745        | MM   | 1.6222      | 67.29838     | 6.91447e-1   | 0.4778  |

Totals : 1.40837e4 106.44605

# HPLC of racemic-2b

Data File E:\DATA\LXX\YC-CN-3\CL-BR-CN-RAC-AD 2017-11-20 14-41-19\011-1501.D  
Sample Name: LGY-1-30-1-RE-2

```
=====
Acq. Operator   : SYSTEM                               Seq. Line :   15
Acq. Instrument : 1260HPLC-VWD                         Location  : Vial 11
Injection Date  : 11/21/2017 12:11:03 AM              Inj       :    1
                                                    Inj Volume: 5.000 µl
Acq. Method    : E:\DATA\LXX\YC-CN-3\CL-BR-CN-RAC-AD 2017-11-20 14-41-19\VWD-AD(1-2)-80-
                20-1ML-5UL-220NM-120MIN.M
Last changed   : 11/20/2017 7:15:44 PM by SYSTEM
Analysis Method: E:\DATA\LXX\YC-CN-3\CL-BR-CN-RAC-AD 2017-11-20 14-41-19\VWD-AD(1-2)-80-
                20-1ML-5UL-220NM-120MIN.M (Sequence Method)
Last changed   : 4/13/2018 10:38:59 AM by SYSTEM
                (modified after loading)
Additional Info : Peak(s) manually integrated
=====
```

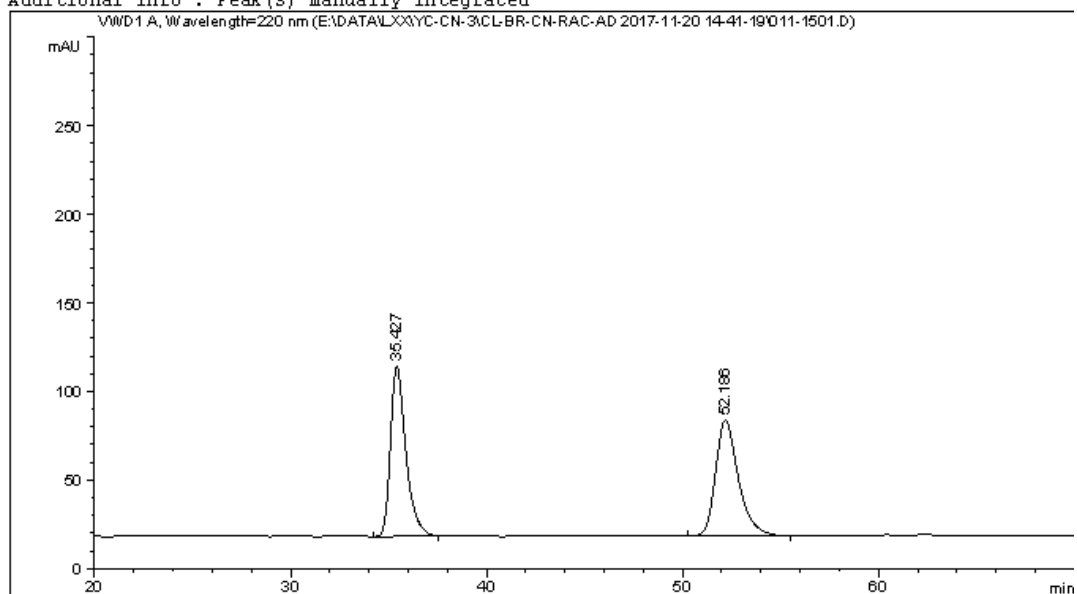

```
=====
                          Area Percent Report
=====
```

```
Sorted By      :      Signal
Multiplier     :      1.0000
Dilution       :      1.0000
Do not use Multiplier & Dilution Factor with ISTDs
```

Signal 1: VWD1 A, Wavelength=220 nm

| Peak # | RetTime [min] | Type | Width [min] | Area [mAU*s] | Height [mAU] | Area %  |
|--------|---------------|------|-------------|--------------|--------------|---------|
| 1      | 35.427        | BB   | 0.8183      | 5244.05957   | 96.45979     | 49.9569 |
| 2      | 52.186        | BB   | 1.2062      | 5253.11182   | 65.18310     | 50.0431 |

```
Totals :                      1.04972e4  161.64289
```

```
=====
*** End of Report ***
```

# HPLC of 2b

Data File E:\DATA\LGY\LGY-1-95\LGY-1-95 2018-01-11 09-00-29\046-2101.D  
 Sample Name: LGY-1-95-6

```

=====
Acq. Operator   : SYSTEM                               Seq. Line : 21
Acq. Instrument : 1260HPLC-VWD                         Location  : Vial 46
Injection Date  : 1/11/2018 10:48:07 PM                Inj       : 1
                                                    Inj Volume: 5.000 µl
Acq. Method     : E:\DATA\LGY\LGY-1-95\LGY-1-95 2018-01-11 09-00-29\VWD-AD(1-2)-80-20-1ML-
                  SUL-220NM-70MIN.M
Last changed    : 1/11/2018 9:32:22 AM by SYSTEM
Analysis Method : E:\DATA\LGY\LGY-1-95\LGY-1-95 2018-01-11 09-00-29\VWD-AD(1-2)-80-20-1ML-
                  SUL-220NM-70MIN.M (Sequence Method)
Last changed    : 4/13/2018 11:11:59 AM by SYSTEM
                  (modified after loading)
Additional Info : Peak(s) manually integrated
  
```

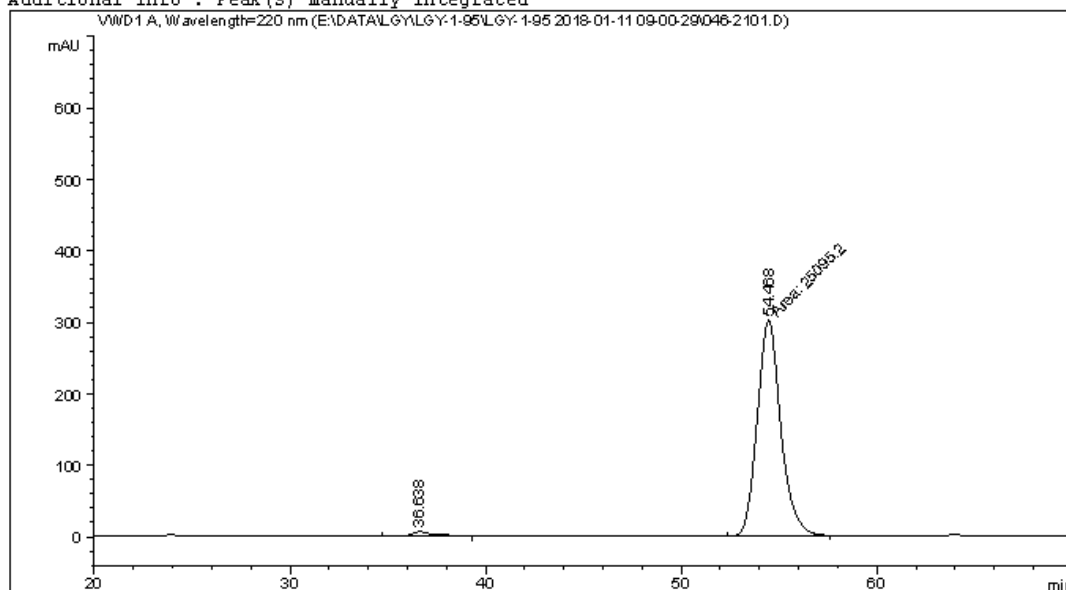

## Area Percent Report

```

Sorted By      : Signal
Multiplier     : 1.0000
Dilution      : 1.0000
Do not use Multiplier & Dilution Factor with ISTDs
  
```

Signal 1: VWD1 A, Wavelength=220 nm

| Peak # | RetTime [min] | Type | Width [min] | Area [mAU*s] | Height [mAU] | Area %  |
|--------|---------------|------|-------------|--------------|--------------|---------|
| 1      | 36.638        | BB   | 0.9879      | 444.26672    | 6.31377      | 1.7395  |
| 2      | 54.468        | MM   | 1.3885      | 2.50952e4    | 301.22711    | 98.2605 |

Totals : 2.55395e4 307.54088

\*\*\* End of Report \*\*\*

# HPLC of racemic-2c

Data File E:\DATA\LGY\LGY-1-30\LGY-1-30 2017-11-18 09-16-49\002-0301.D  
Sample Name: LGY-1-30-2-RE

```
=====
Acq. Operator   : SYSTEM                      Seq. Line :    3
Acq. Instrument : 1260HPLC-VWD                Location  : Vial 2
Injection Date  : 11/18/2017 11:29:08 AM      Inj       :    1
                                           Inj Volume: 5.000 µl
Acq. Method     : E:\DATA\LGY\LGY-1-30\LGY-1-30 2017-11-18 09-16-49\VWD-AD1-2)-90-10-1ML-
                  SUL-220NM-120MIN.M
Last changed    : 11/18/2017 9:16:49 AM by SYSTEM
Analysis Method : E:\DATA\LGY\LGY-1-30\LGY-1-30 2017-11-18 09-16-49\VWD-AD1-2)-90-10-1ML-
                  SUL-220NM-120MIN.M (Sequence Method)
Last changed    : 4/13/2018 11:15:55 AM by SYSTEM
                  (modified after loading)
Additional Info : Peak(s) manually integrated
=====
```

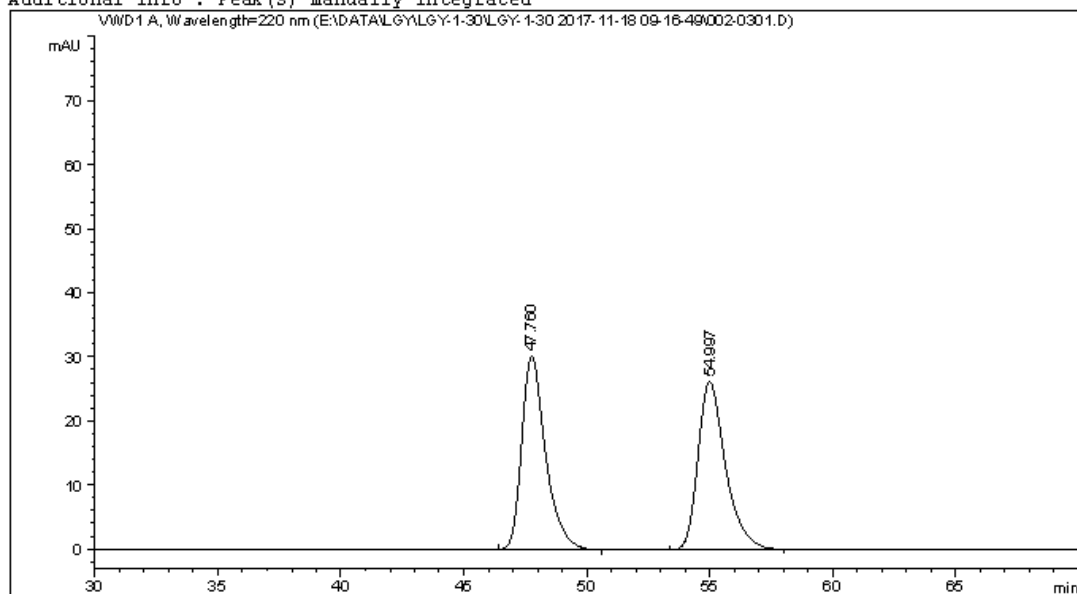

```
=====
                          Area Percent Report
=====
```

```
Sorted By      :      Signal
Multiplier     :      1.0000
Dilution       :      1.0000
Do not use Multiplier & Dilution Factor with ISTDs
```

Signal 1: VWD1 A, Wavelength=220 nm

| Peak # | RetTime [min] | Type | Width [min] | Area [mAU*s] | Height [mAU] | Area %  |
|--------|---------------|------|-------------|--------------|--------------|---------|
| 1      | 47.760        | BB   | 1.0081      | 2028.27917   | 30.18014     | 49.8963 |
| 2      | 54.997        | BB   | 1.1583      | 2036.71033   | 26.21724     | 50.1037 |

```
Totals :                      4064.98950  56.39738
```

```
=====
*** End of Report ***
```

# HPLC of 2c

Data File E:\DATA\LGY\GY-1-95\GY-1-95 2018-01-11 09-00-29\051-2301.D  
Sample Name: LGY-1-95-7

```
=====
Acq. Operator   : SYSTEM                               Seq. Line :   23
Acq. Instrument : 1260HPLC-VWD                         Location  : Vial 51
Injection Date  : 1/12/2018 12:09:48 AM              Inj       :    1
                                                    Inj Volume: 5.000 µl
Acq. Method     : E:\DATA\LGY\GY-1-95\GY-1-95 2018-01-11 09-00-29\VWD-AD(1-2)-90-10-1ML-
                  SUL-220NM-70MIN.M
Last changed    : 1/11/2018 9:57:00 AM by SYSTEM
Analysis Method : E:\DATA\LGY\GY-1-95\GY-1-95 2018-01-11 09-00-29\VWD-AD(1-2)-90-10-1ML-
                  SUL-220NM-70MIN.M (Sequence Method)
Last changed    : 4/13/2018 11:25:57 AM by SYSTEM
                  (modified after loading)
Additional Info : Peak(s) manually integrated
=====
```

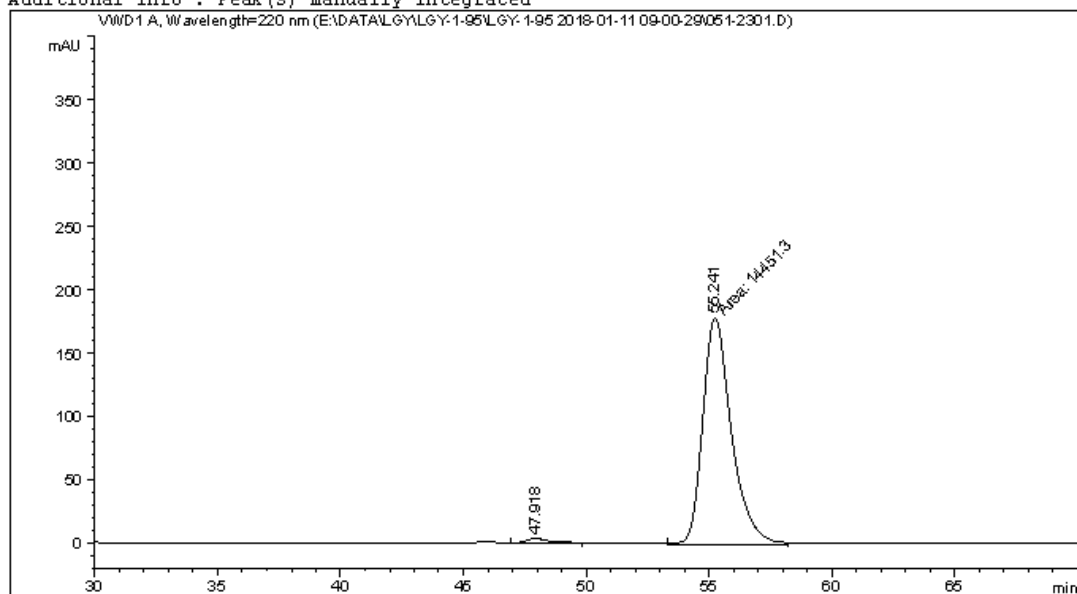

## Area Percent Report

```
Sorted By      : Signal
Multiplier     : 1.0000
Dilution       : 1.0000
Do not use Multiplier & Dilution Factor with ISTDs
```

Signal 1: VWD1 A, Wavelength=220 nm

| Peak # | RetTime [min] | Type | Width [min] | Area [mAU*s] | Height [mAU] | Area %  |
|--------|---------------|------|-------------|--------------|--------------|---------|
| 1      | 47.918        | BB   | 0.8864      | 201.08961    | 3.24308      | 1.3724  |
| 2      | 55.241        | MM   | 1.3502      | 1.44513e4    | 178.37892    | 98.6276 |

Totals : 1.46524e4 181.62200

\*\*\* End of Report \*\*\*

# HPLC of racemic-2d

Data File E:\DATA\LGY\LGY-1-48\LGY-1-48 2017-11-28 08-45-45\001-0201.D  
Sample Name: LGY-1-48

```
=====
Acq. Operator   : SYSTEM                      Seq. Line :    2
Acq. Instrument : 1260HPLC-VWD                Location  : Vial 1
Injection Date  : 11/28/2017 8:59:18 AM      Inj       :    1
                                           Inj Volume: 5.000 µl
Acq. Method     : E:\DATA\LGY\LGY-1-48\LGY-1-48 2017-11-28 08-45-45\VWD-AD(1-2)-90-10-1ML-
                  SUL-220NM-60MIN.M
Last changed    : 11/28/2017 8:45:45 AM by SYSTEM
Analysis Method : E:\DATA\LGY\LGY-1-48\LGY-1-48 2017-11-28 08-45-45\VWD-AD(1-2)-90-10-1ML-
                  SUL-220NM-60MIN.M (Sequence Method)
Last changed    : 4/13/2018 2:34:27 PM by SYSTEM
                  (modified after loading)
Additional Info : Peak(s) manually integrated
=====
```

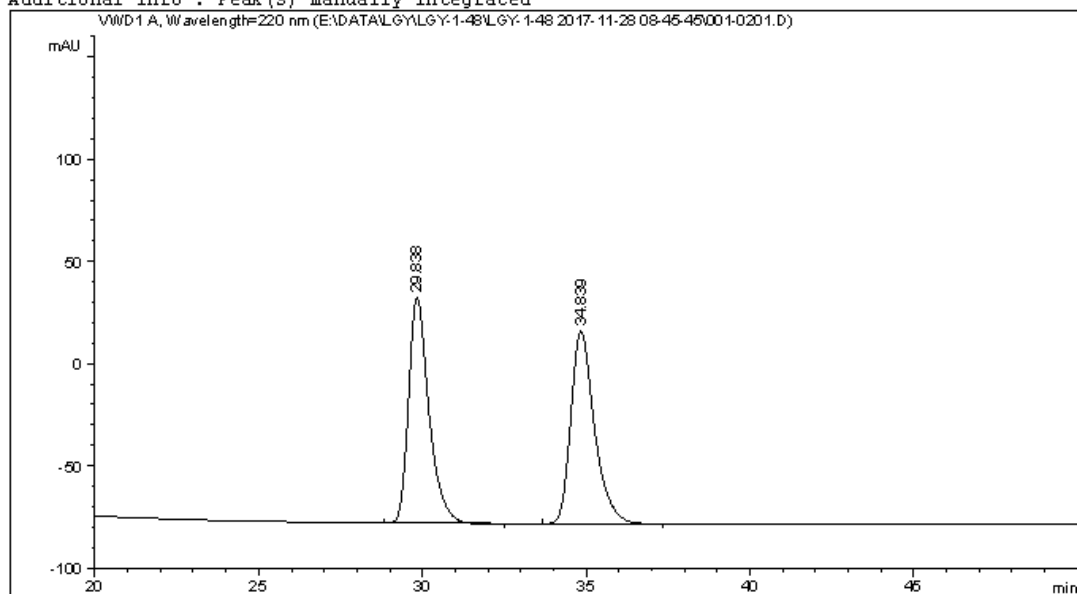

## Area Percent Report

```
Sorted By      : Signal
Multiplier     : 1.0000
Dilution       : 1.0000
Do not use Multiplier & Dilution Factor with ISTDs
```

Signal 1: VWD1 A, Wavelength=220 nm

| Peak # | RetTime [min] | Type | Width [min] | Area [mAU*s] | Height [mAU] | Area %  |
|--------|---------------|------|-------------|--------------|--------------|---------|
| 1      | 29.838        | BB   | 0.6488      | 4745.69092   | 110.33386    | 50.0321 |
| 2      | 34.839        | BB   | 0.7594      | 4739.59814   | 94.30391     | 49.9679 |

Totals : 9485.28906 204.63777

\*\*\* End of Report \*\*\*



# HPLC of 2d

Data File E:\DATA\LGY\LGY-1-95\LGY-1-95 2018-01-11 09-00-29\052-2401.D  
Sample Name: LGY-1-95-8

```
=====
Acq. Operator   : SYSTEM                      Seq. Line : 24
Acq. Instrument : 1260HPLC-VWD                Location  : Vial 52
Injection Date  : 1/12/2018 1:20:36 AM        Inj       : 1
                                           Inj Volume: 5.000 µl
Acq. Method     : E:\DATA\LGY\LGY-1-95\LGY-1-95 2018-01-11 09-00-29\VWD-AD(1-2)-90-10-1ML-
                    SUL-220NM-60MIN.M
Last changed    : 1/11/2018 9:58:22 AM by SYSTEM
Analysis Method : E:\DATA\LGY\LGY-1-95\LGY-1-95 2018-01-11 09-00-29\VWD-AD(1-2)-90-10-1ML-
                    SUL-220NM-60MIN.M (Sequence Method)
Last changed    : 4/13/2018 2:41:55 PM by SYSTEM
                    (modified after loading)
Additional Info : Peak(s) manually integrated
=====
```

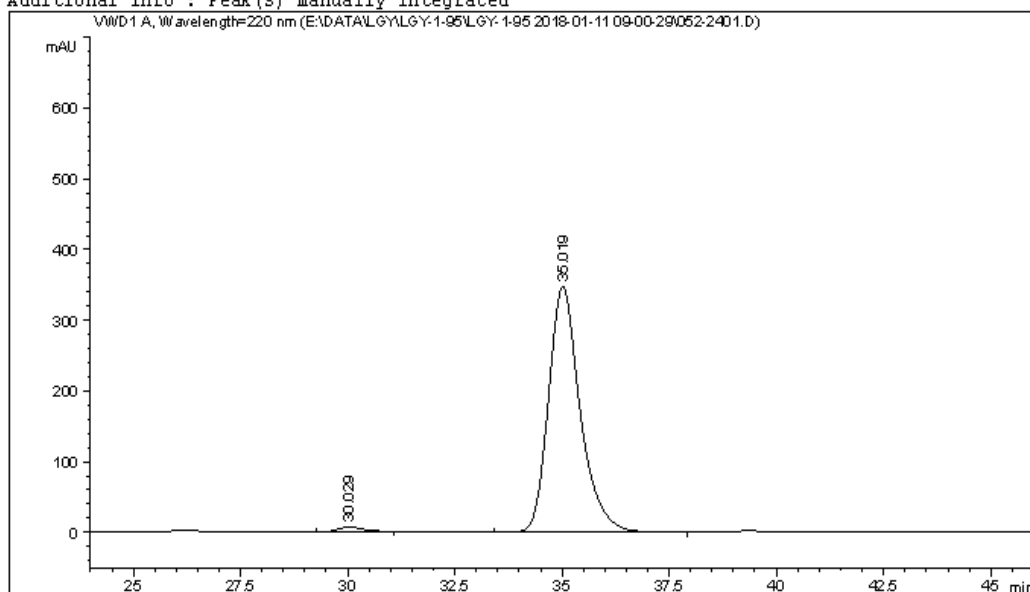

## Area Percent Report

```
Sorted By      : Signal
Multiplier     : 1.0000
Dilution       : 1.0000
Do not use Multiplier & Dilution Factor with ISTDs
```

Signal 1: WWD1 A, Wavelength=220 nm

| Peak # | RetTime [min] | Type | Width [min] | Area [mAU*s] | Height [mAU] | Area %  |
|--------|---------------|------|-------------|--------------|--------------|---------|
| 1      | 30.029        | BB   | 0.6273      | 273.22952    | 6.62337      | 1.5151  |
| 2      | 35.019        | BB   | 0.7703      | 1.77611e4    | 347.47638    | 98.4849 |

Totals : 1.80343e4 354.09975

\*\*\* End of Report \*\*\*

# HPLC of racemic-2e

Data File E:\DATA\LGY\LGY-1-43-RE\LGY-1-43-RE 2017-11-21 20-17-16\001-0201.D  
 Sample Name: LGY-1-43-2

```

=====
Acq. Operator   : SYSTEM                               Seq. Line :    2
Acq. Instrument : 1260HPLC-VWD                         Location  : Vial 1
Injection Date  : 11/21/2017 8:28:50 PM                Inj       :    1
                                                    Inj Volume: 5.000 µl
Acq. Method     : E:\DATA\LGY\LGY-1-43-RE\LGY-1-43-RE 2017-11-21 20-17-16\VWD-AD(1-2)-90-
                  10-1ML-SUL-220NM-80MIN.M
Last changed    : 11/21/2017 8:17:16 PM by SYSTEM
Analysis Method : E:\DATA\LGY\LGY-1-43-RE\LGY-1-43-RE 2017-11-21 20-17-16\VWD-AD(1-2)-90-
                  10-1ML-SUL-220NM-80MIN.M (Sequence Method)
Last changed    : 4/13/2018 2:45:27 PM by SYSTEM
                  (modified after loading)
Additional Info : Peak(s) manually integrated
  
```

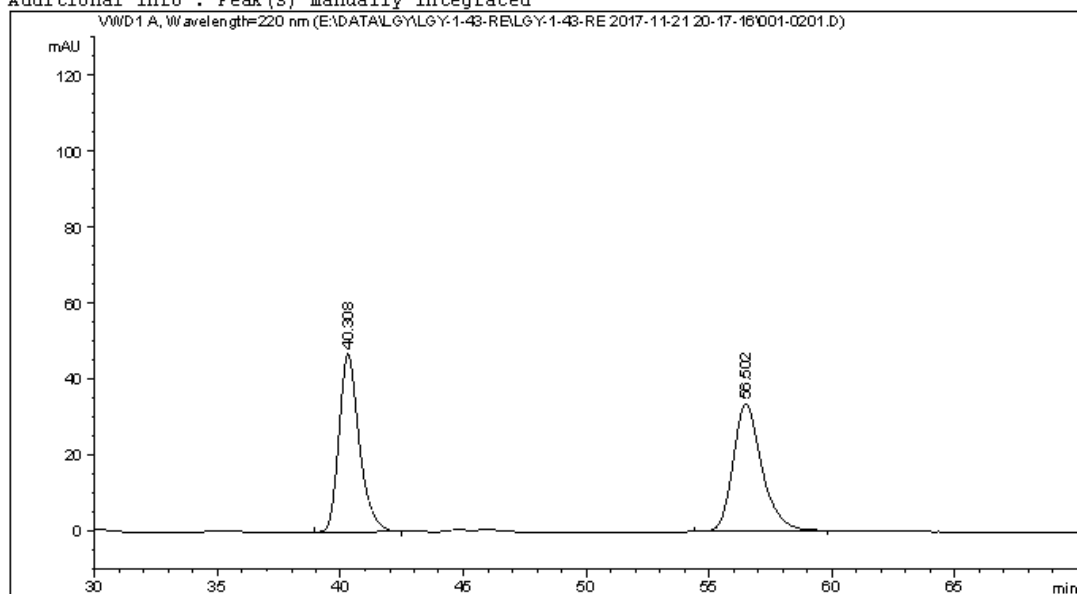

## Area Percent Report

```

Sorted By      : Signal
Multiplier     : 1.0000
Dilution       : 1.0000
Do not use Multiplier & Dilution Factor with ISTDs
  
```

Signal 1: VWD1 A, Wavelength=220 nm

| Peak # | RetTime [min] | Type | Width [min] | Area [mAU*s] | Height [mAU] | Area %  |
|--------|---------------|------|-------------|--------------|--------------|---------|
| 1      | 40.308        | BB   | 0.8700      | 2698.65698   | 46.85027     | 49.7331 |
| 2      | 56.502        | BB   | 1.2107      | 2727.62354   | 33.54262     | 50.2669 |

Totals : 5426.28052 80.39289

\*\*\* End of Report \*\*\*

# HPLC of 2e

Data File E:\DATA\LGY\LGY-1-95\LGY-1-95 2018-01-11 09-00-29\053-2501.D  
Sample Name: LGY-1-95-9

```
=====
Acq. Operator   : SYSTEM                               Seq. Line : 25
Acq. Instrument : 1260HPLC-VWD                         Location  : Vial 53
Injection Date  : 1/12/2018 2:21:26 AM                 Inj       : 1
                                                    Inj Volume: 5.000 µl
Acq. Method     : E:\DATA\LGY\LGY-1-95\LGY-1-95 2018-01-11 09-00-29\VWD-AD(1-2)-90-10-1ML-
                    SUL-220NM-70MIN.M
Last changed    : 1/11/2018 9:57:00 AM by SYSTEM
Analysis Method : E:\DATA\LGY\LGY-1-95\LGY-1-95 2018-01-11 09-00-29\VWD-AD(1-2)-90-10-1ML-
                    SUL-220NM-70MIN.M (Sequence Method)
Last changed    : 4/13/2018 2:52:00 PM by SYSTEM
                    (modified after loading)
Additional Info : Peak(s) manually integrated
=====
```

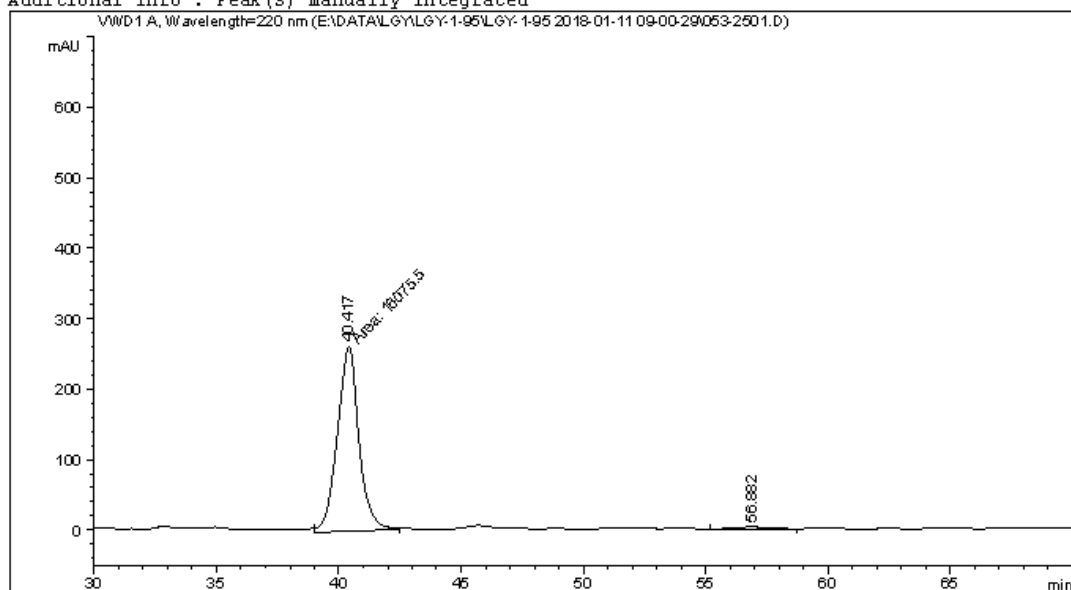

## Area Percent Report

```
=====
Sorted By      : Signal
Multiplier     : 1.0000
Dilution       : 1.0000
Do not use Multiplier & Dilution Factor with ISTDs
=====
```

Signal 1: VWD1 A, Wavelength=220 nm

| Peak # | RetTime [min] | Type | Width [min] | Area [mAU*s] | Height [mAU] | Area %  |
|--------|---------------|------|-------------|--------------|--------------|---------|
| 1      | 40.417        | MM   | 1.0239      | 1.60755e4    | 261.68359    | 98.2730 |
| 2      | 56.882        | BB   | 1.1743      | 282.50827    | 2.90835      | 1.7270  |

Totals : 1.63580e4 264.59194

\*\*\* End of Report \*\*\*

# HPLC of racemic-2f

Data File E:\DATA\LGY\LGY-1-30\LGY-1-30 2017-11-18 09-16-49\003-0701.D  
Sample Name: LGY-1-30-3

```
=====
Acq. Operator   : SYSTEM                      Seq. Line :    7
Acq. Instrument : 1260HPLC-VWD                Location  : Vial 3
Injection Date  : 11/18/2017 2:32:24 PM      Inj       :    1
                                           Inj Volume: 5.000 µl
Acq. Method     : E:\DATA\LGY\LGY-1-30\LGY-1-30 2017-11-18 09-16-49\VWD-AD1-2)-90-10-1ML-
                    SUL-220NM-120MIN.M
Last changed    : 11/18/2017 3:20:37 PM by SYSTEM
                    (modified after loading)
Analysis Method : E:\DATA\LGY\LGY-1-30\LGY-1-30 2017-11-18 09-16-49\VWD-AD1-2)-90-10-1ML-
                    SUL-220NM-120MIN.M (Sequence Method)
Last changed    : 4/13/2018 2:55:30 PM by SYSTEM
                    (modified after loading)
Additional Info : Peak(s) manually integrated
=====
```

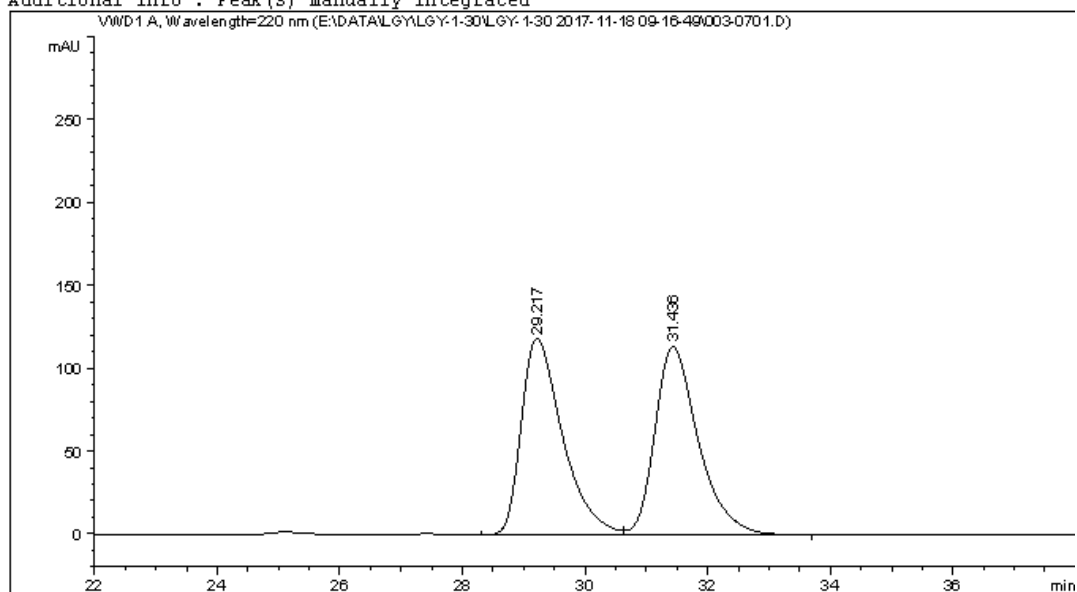

## Area Percent Report

```
=====
Sorted By      :      Signal
Multiplier     :      1.0000
Dilution       :      1.0000
Do not use Multiplier & Dilution Factor with ISTDs
=====
```

Signal 1: VWD1 A, Wavelength=220 nm

| Peak # | RetTime [min] | Type | Width [min] | Area [mAU*s] | Height [mAU] | Area %  |
|--------|---------------|------|-------------|--------------|--------------|---------|
| 1      | 29.217        | BV   | 0.7098      | 5531.45459   | 118.23405    | 49.8168 |
| 2      | 31.436        | WB   | 0.7460      | 5572.14600   | 113.45072    | 50.1832 |

Totals :                    1.11036e4   231.68477

# HPLC of 2f

Data File E:\DATA\LGY\LGY-1-99\LGY-1-99 2018-01-17 23-28-41\011-0301.D  
 Sample Name: LGY-1-99-1

```

=====
Acq. Operator   : SYSTEM                               Seq. Line :    3
Acq. Instrument : 1260HPLC-VWD                         Location  : Vial 11
Injection Date  : 1/18/2018 12:11:03 AM                Inj       :    1
                                                    Inj Volume: 5.000 µl
Acq. Method     : E:\DATA\LGY\LGY-1-99\LGY-1-99 2018-01-17 23-28-41\VWD-AD(1-2)-90-10-1ML-
                    SUL-220NM-40MIN.M
Last changed    : 1/17/2018 11:28:41 PM by SYSTEM
Analysis Method : E:\DATA\LGY\LGY-1-99\LGY-1-99 2018-01-17 23-28-41\VWD-AD(1-2)-90-10-1ML-
                    SUL-220NM-40MIN.M (Sequence Method)
Last changed    : 4/13/2018 3:01:00 PM by SYSTEM
                    (modified after loading)
Additional Info : Peak(s) manually integrated
  
```

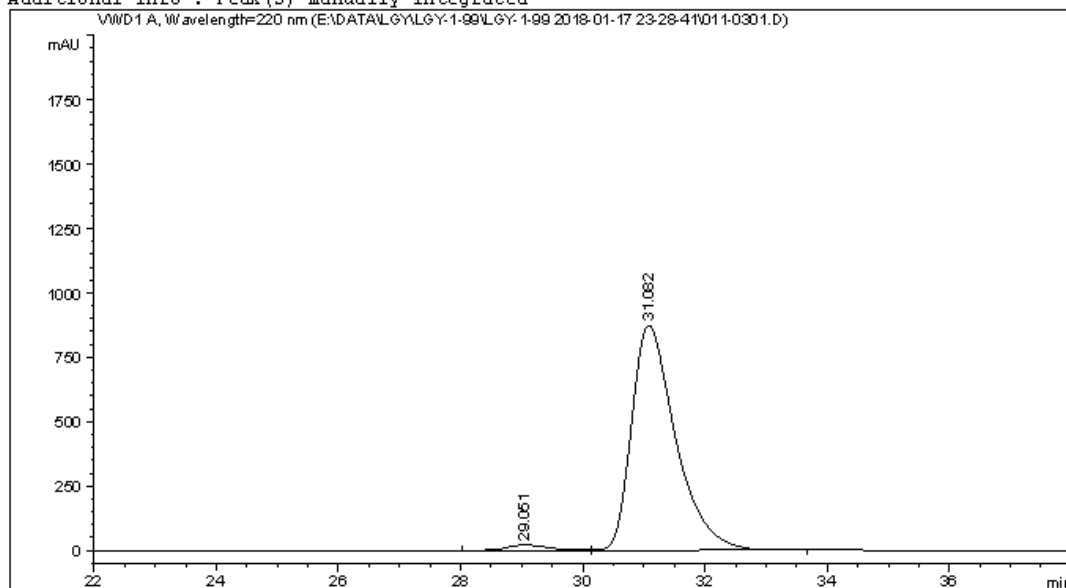

## Area Percent Report

```

Sorted By      : Signal
Multiplier     : 1.0000
Dilution      : 1.0000
Do not use Multiplier & Dilution Factor with ISTDs
  
```

Signal 1: VWD1 A, Wavelength=220 nm

| Peak # | RetTime [min] | Type | Width [min] | Area [mAU*s] | Height [mAU] | Area %  |
|--------|---------------|------|-------------|--------------|--------------|---------|
| 1      | 29.051        | BV   | 0.6723      | 909.31097    | 20.34970     | 2.0434  |
| 2      | 31.082        | VB   | 0.7529      | 4.35909e4    | 873.90997    | 97.9566 |

Totals :                                    4.45002e4    894.25967

\*\*\* End of Report \*\*\*

# HPLC of racemic-2g

Data File E:\DATA\LGY\LGY-1-43-RE-1\LGY-1-43-RE-1 2017-11-22 08-15-14\001-0401.D  
 Sample Name: LGY-1-43-3--RE

```

=====
Acq. Operator   : SYSTEM                      Seq. Line :    4
Acq. Instrument : 1260HPLC-VWD                Location  : Vial 1
Injection Date  : 11/22/2017 10:40:29 AM     Inj       :    1
                                           Inj Volume: 5.000 µl
Acq. Method     : E:\DATA\LGY\LGY-1-43-RE-1\LGY-1-43-RE-1 2017-11-22 08-15-14\VWD-AD1-2)-
90-10-1ML-5UL-220NM-120MIN.M
Last changed    : 11/22/2017 10:25:44 AM by SYSTEM
Analysis Method : E:\DATA\LGY\LGY-1-43-RE-1\LGY-1-43-RE-1 2017-11-22 08-15-14\VWD-AD1-2)-
90-10-1ML-5UL-220NM-120MIN.M (Sequence Method)
Last changed    : 4/13/2018 3:11:26 PM by SYSTEM
                 (modified after loading)
Additional Info : Peak(s) manually integrated
  
```

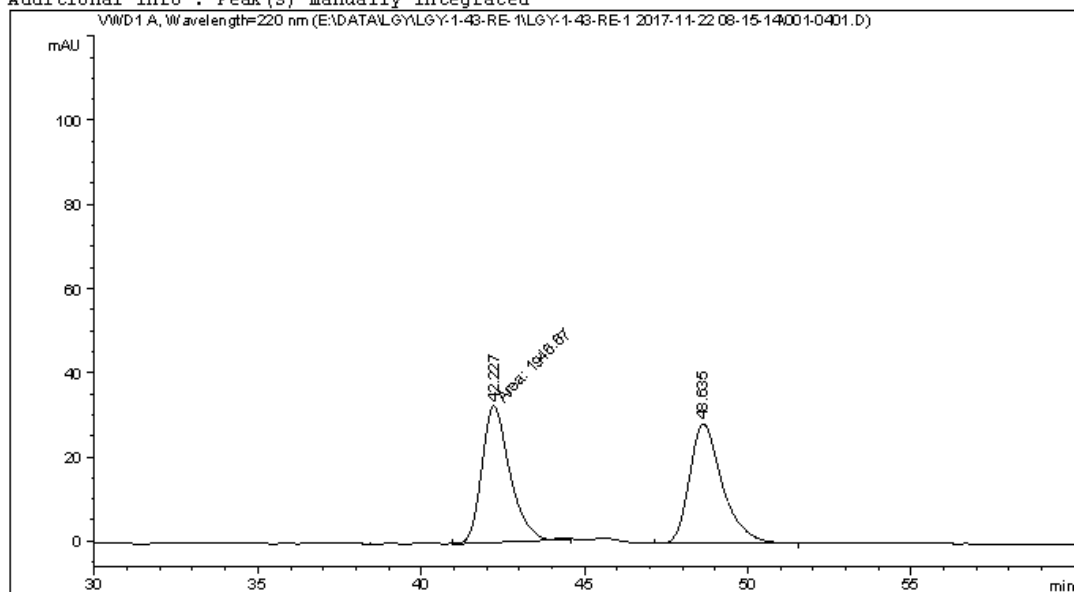

## Area Percent Report

```

Sorted By      : Signal
Multiplier     : 1.0000
Dilution      : 1.0000
Do not use Multiplier & Dilution Factor with ISTDs
  
```

Signal 1: VWD1 A, Wavelength=220 nm

| Peak # | RetTime [min] | Type | Width [min] | Area [mAU*s] | Height [mAU] | Area %  |
|--------|---------------|------|-------------|--------------|--------------|---------|
| 1      | 42.227        | MM   | 0.9985      | 1946.67358   | 32.49449     | 49.5317 |
| 2      | 48.635        | BB   | 1.0459      | 1983.48608   | 28.43331     | 50.4683 |

Totals : 3930.15967 60.92780

\*\*\* End of Report \*\*\*

# HPLC of 2g

Data File E:\DATA\LGY\LGY-1-99\LGY-1-99 2018-01-17 23-28-41\012-0401.D  
Sample Name: LGY-1-99-2

```
=====
Acq. Operator   : SYSTEM                               Seq. Line :    4
Acq. Instrument : 1260HPLC-VWD                         Location  : Vial 12
Injection Date  : 1/18/2018 12:51:51 AM                Inj       :    1
                                                    Inj Volume: 5.000 µl
Acq. Method     : E:\DATA\LGY\LGY-1-99\LGY-1-99 2018-01-17 23-28-41\VWD-AD(1-2)-90-10-1ML-
                  SUL-220NM-60MIN.M
Last changed    : 1/17/2018 11:28:42 PM by SYSTEM
Analysis Method : E:\DATA\LGY\LGY-1-99\LGY-1-99 2018-01-17 23-28-41\VWD-AD(1-2)-90-10-1ML-
                  SUL-220NM-60MIN.M (Sequence Method)
Last changed    : 4/13/2018 3:16:25 PM by SYSTEM
                  (modified after loading)
Additional Info : Peak(s) manually integrated
=====
```

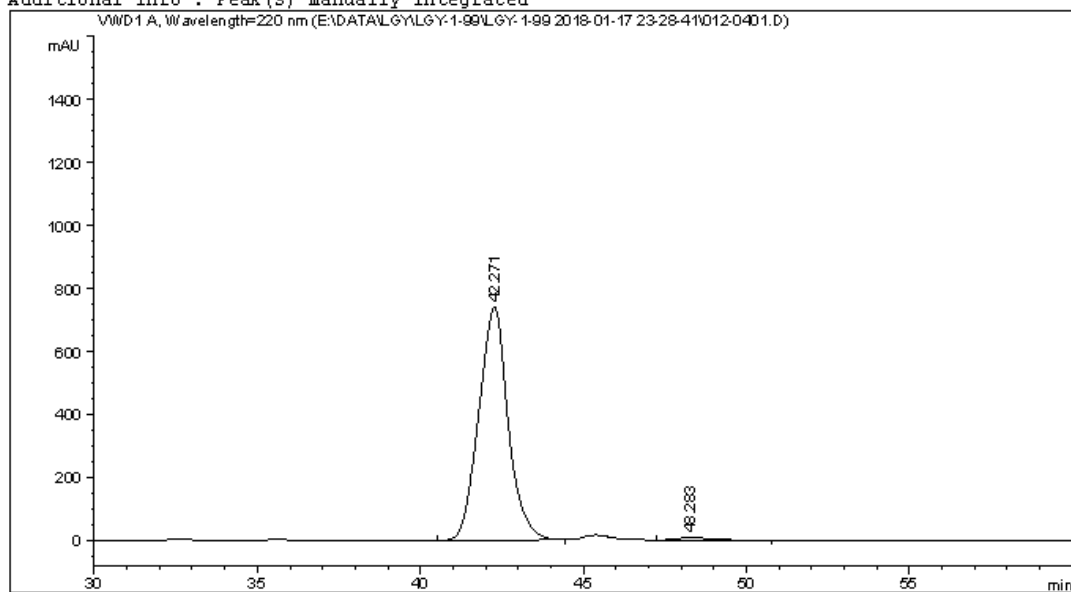

## Area Percent Report

```
=====
Sorted By      : Signal
Multiplier     : 1.0000
Dilution       : 1.0000
Do not use Multiplier & Dilution Factor with ISTDs
=====
```

Signal 1: VWD1 A, Wavelength=220 nm

| Peak # | RetTime [min] | Type | Width [min] | Area [mAU*s] | Height [mAU] | Area %  |
|--------|---------------|------|-------------|--------------|--------------|---------|
| 1      | 42.271        | BB   | 0.9493      | 4.63086e4    | 739.79163    | 98.8203 |
| 2      | 48.283        | BB   | 0.9826      | 552.80939    | 8.31575      | 1.1797  |

Totals : 4.68614e4 748.10738

\*\*\* End of Report \*\*\*

# HPLC of racemic-2h

Data File E:\DATA\LGY\LGY-1-62-RAC-2\LGY-1-62-RAC-2 2017-12-20 09-19-39\005-0301.D  
 Sample Name: LGY-1-62-1

```

=====
Acq. Operator   : SYSTEM                               Seq. Line :    3
Acq. Instrument : 1260HPLC-DAD                         Location  : Vial 5
Injection Date  : 12/20/2017 10:48:46 AM              Inj       :    1
                                                    Inj Volume: 7.000 µl
Acq. Method    : E:\DATA\LGY\LGY-1-62-RAC-2\LGY-1-62-RAC-2 2017-12-20 09-19-39\DAD-OD(1-2
                )-85-15-1ML-7UL-ALL-70MIN.M
Last changed   : 12/20/2017 9:19:39 AM by SYSTEM
Analysis Method: E:\DATA\LGY\LGY-1-62-RAC-2\LGY-1-62-RAC-2 2017-12-20 09-19-39\DAD-OD(1-2
                )-85-15-1ML-7UL-ALL-70MIN.M (Sequence Method)
Last changed   : 4/13/2018 3:25:12 PM by SYSTEM
                (modified after loading)
Additional Info : Peak(s) manually integrated
  
```

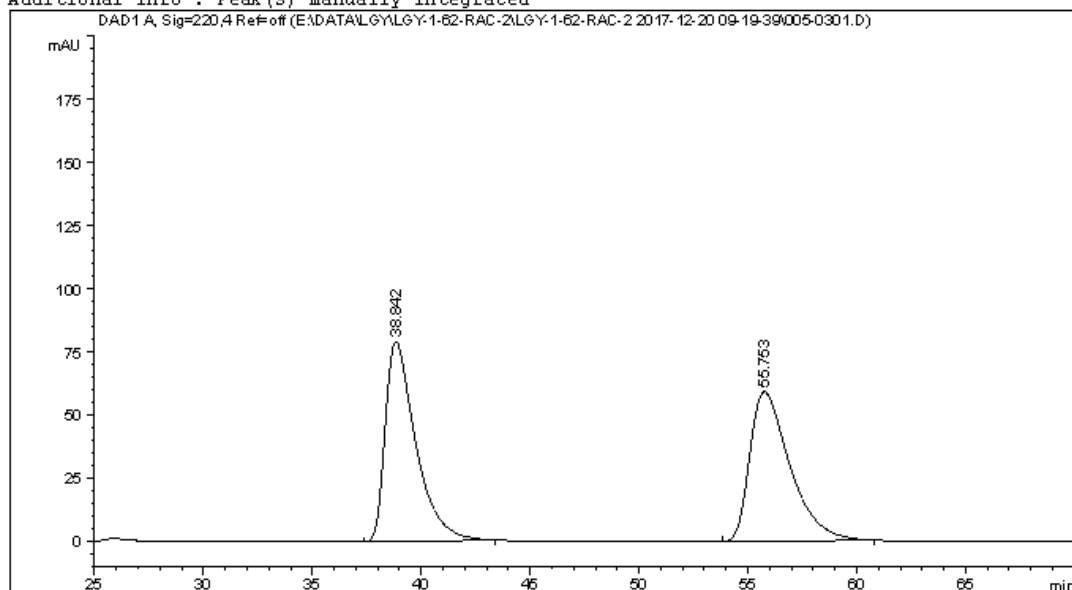

## Area Percent Report

```

Sorted By      :      Signal
Multiplier     :      1.0000
Dilution       :      1.0000
Do not use Multiplier & Dilution Factor with ISTDs
  
```

Signal 1: DAD1 A, Sig=220,4 Ref=off

| Peak # | RetTime [min] | Type | Width [min] | Area [mAU*s] | Height [mAU] | Area %  |
|--------|---------------|------|-------------|--------------|--------------|---------|
| 1      | 38.842        | BB   | 1.3572      | 7681.99365   | 79.09193     | 50.3339 |
| 2      | 55.753        | BB   | 1.5096      | 7580.08252   | 59.13079     | 49.6661 |

Totals :                                    1.52621e4    138.22271

\*\*\* End of Report \*\*\*



# HPLC of 2h

Data File E:\DATA\YCC\YCC-2018-01-17\YCC-233 2018-04-12 08-57-37\004-5001.D  
 Sample Name: LGY-1-99-3

```

=====
Acq. Operator   : SYSTEM                               Seq. Line :   50
Acq. Instrument : 1260HPLC-DAD                         Location  : Vial 4
Injection Date  : 4/13/2018 8:38:57 AM                 Inj       :    1
                                                    Inj Volume: 7.000 µl
Acq. Method     : E:\DATA\YCC\YCC-2018-01-17\YCC-233 2018-04-12 08-57-37\DAD-OD(1-2)-85-15
                  -1ML-7UL-ALL-70MIN.M
Last changed    : 4/12/2018 8:57:25 PM by SYSTEM
Analysis Method : E:\DATA\YCC\YCC-2018-01-17\YCC-233 2018-04-12 08-57-37\DAD-OD(1-2)-85-15
                  -1ML-7UL-ALL-70MIN.M (Sequence Method)
Last changed    : 4/13/2018 3:30:25 PM by SYSTEM
                  (modified after loading)
Additional Info : Peak(s) manually integrated
  
```

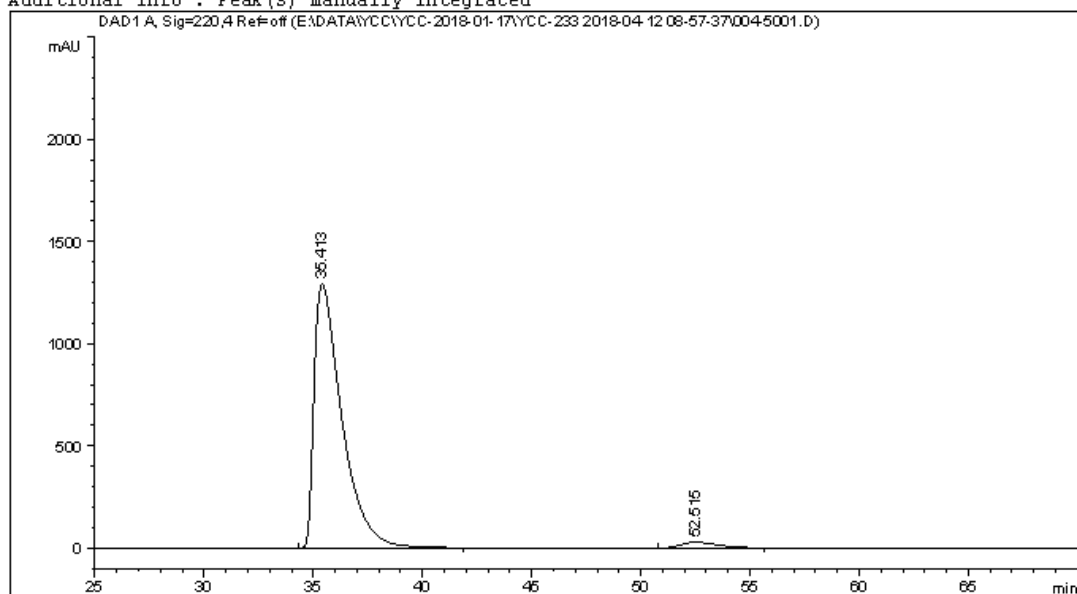

## Area Percent Report

```

Sorted By      :      Signal
Multiplier     :      1.0000
Dilution      :      1.0000
Do not use Multiplier & Dilution Factor with ISTDs
  
```

Signal 1: DAD1 A, Sig=220,4 Ref=off

| Peak # | RetTime [min] | Type | Width [min] | Area [mAU*s] | Height [mAU] | Area %  |
|--------|---------------|------|-------------|--------------|--------------|---------|
| 1      | 35.413        | BB   | 1.2040      | 1.13739e5    | 1290.86548   | 97.4011 |
| 2      | 52.515        | BB   | 1.2788      | 3034.80859   | 27.77357     | 2.5989  |

Totals : 1.16774e5 1318.63905

\*\*\* End of Report \*\*\*

# HPLC of racemic-2i

Data File E:\DATA\LGY\LGY-1-89\LGY-1-89 2017-12-28 08-35-12\041-0201.D  
 Sample Name: LGY-1-89-RAC

```

=====
Acq. Operator   : SYSTEM                               Seq. Line :    2
Acq. Instrument : 1260HPLC-VWD                         Location  : Vial 41
Injection Date  : 12/28/2017 9:09:00 AM              Inj       :    1
                                                    Inj Volume: 5.000 µl
Acq. Method     : E:\DATA\LGY\LGY-1-89\LGY-1-89 2017-12-28 08-35-12\VWD-AS(1-6)-80-20-1ML-
                  SUL-220NM-90MIN.M
Last changed    : 12/28/2017 10:31:49 AM by SYSTEM
                  (modified after loading)
Analysis Method : E:\DATA\LGY\LGY-1-89\LGY-1-89 2017-12-28 08-35-12\VWD-AS(1-6)-80-20-1ML-
                  SUL-220NM-90MIN.M (Sequence Method)
Last changed    : 4/13/2018 3:35:12 PM by SYSTEM
                  (modified after loading)
Additional Info : Peak(s) manually integrated
  
```

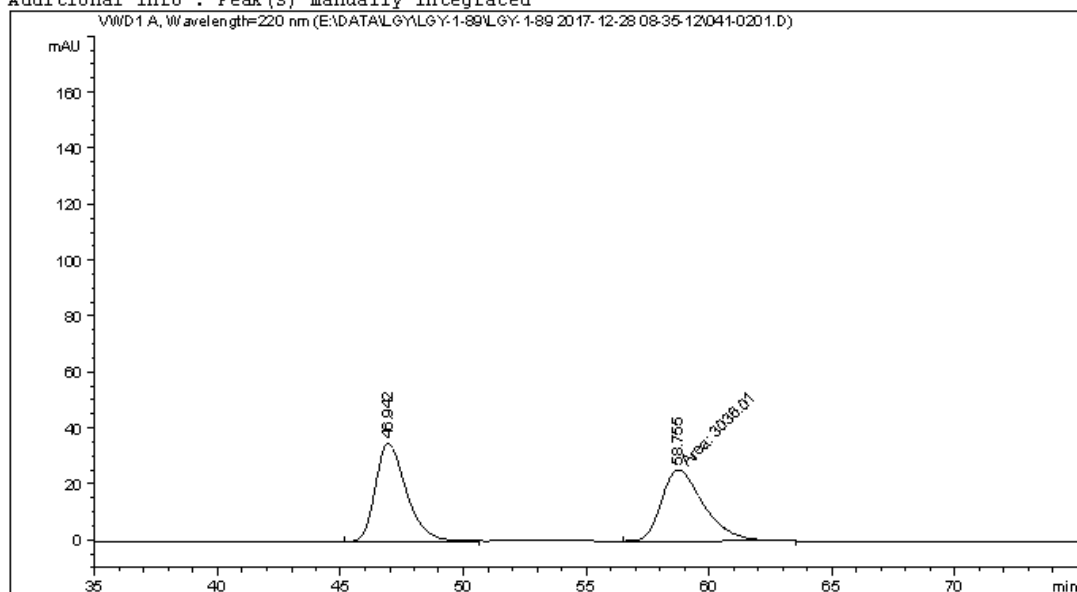

## Area Percent Report

```

=====
Sorted By      :      Signal
Multiplier     :      1.0000
Dilution      :      1.0000
Do not use Multiplier & Dilution Factor with ISTDs
  
```

Signal 1: VWD1 A, Wavelength=220 nm

| Peak # | RetTime [min] | Type | Width [min] | Area [mAU*s] | Height [mAU] | Area %  |
|--------|---------------|------|-------------|--------------|--------------|---------|
| 1      | 46.942        | BB   | 1.3121      | 3043.56836   | 34.98038     | 50.0622 |
| 2      | 58.755        | MM   | 1.9840      | 3036.00806   | 25.50352     | 49.9378 |

Totals :                    6079.57642   60.48391

## HPLC of 2i

Data File E:\DATA\LGY\LGY-1-95\LGY-1-95-RE 2018-01-13 09-06-53\045-0801.D  
Sample Name: LGY-1-95-11-RE

```
=====
Acq. Operator   : SYSTEM                      Seq. Line :    8
Acq. Instrument : 1260HPLC-VWD                Location  : Vial 45
Injection Date  : 1/13/2018 3:01:51 PM        Inj       :    1
                                           Inj Volume: 5.000 µl
Acq. Method     : E:\DATA\LGY\LGY-1-95\LGY-1-95-RE 2018-01-13 09-06-53\VWD-AS(1-6)-80-20-
                  1ML-5UL-220NM-75MIN.M
Last changed    : 1/13/2018 9:06:54 AM by SYSTEM
Analysis Method : E:\DATA\LGY\LGY-1-95\LGY-1-95-RE 2018-01-13 09-06-53\VWD-AS(1-6)-80-20-
                  1ML-5UL-220NM-75MIN.M (Sequence Method)
Last changed    : 4/13/2018 3:50:00 PM by SYSTEM
                  (modified after loading)
Additional Info : Peak(s) manually integrated
=====
```

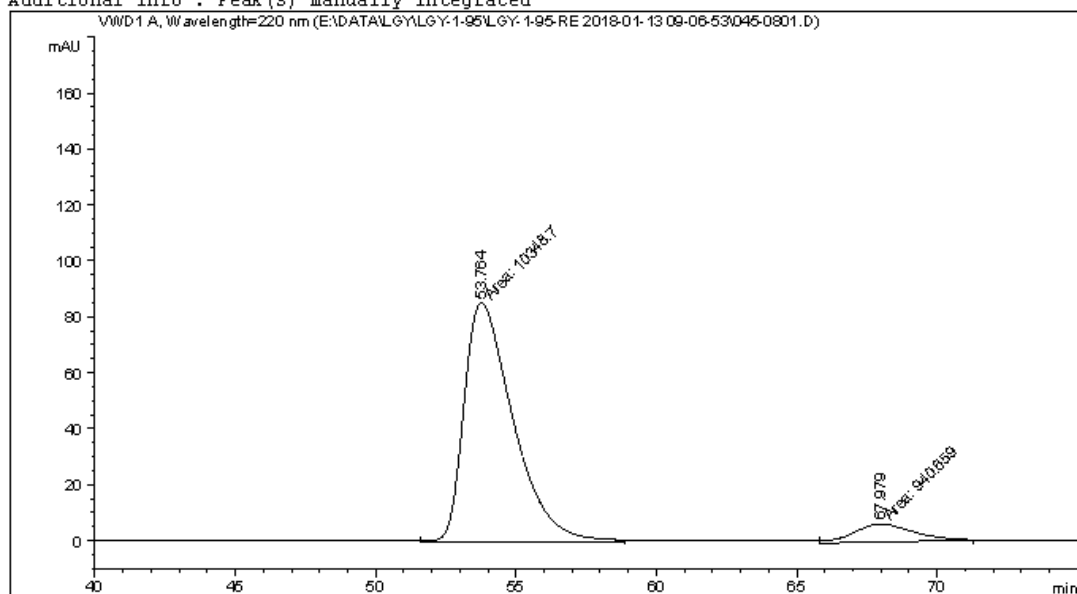

### Area Percent Report

```
Sorted By      : Signal
Multiplier     : 1.0000
Dilution       : 1.0000
Do not use Multiplier & Dilution Factor with ISTDs
```

Signal 1: VWD1 A, Wavelength=220 nm

| Peak # | RetTime [min] | Type | Width [min] | Area [mAU*s] | Height [mAU] | Area %  |
|--------|---------------|------|-------------|--------------|--------------|---------|
| 1      | 53.764        | MM   | 2.0249      | 1.03487e4    | 85.17876     | 91.6677 |
| 2      | 67.979        | MM   | 2.4811      | 940.65881    | 6.31878      | 8.3323  |

Totals : 1.12894e4 91.49755

\*\*\* End of Report \*\*\*

# HPLC of racemic-2j

Data File E:\DATA\LGY\LGY-1-95\LGY-1-95-RE 2018-01-13 18-47-33\064-0701.D  
 Sample Name: LGY-1-94-1-RA

```

=====
Acq. Operator   : SYSTEM                      Seq. Line :    7
Acq. Instrument : 1260HPLC-VWD                Location  : Vial 64
Injection Date  : 1/14/2018 2:53:48 AM       Inj       :    1
                                           Inj Volume: 5.000 µl
Acq. Method     : E:\DATA\LGY\LGY-1-95\LGY-1-95-RE 2018-01-13 18-47-33\VWD-AS(1-6)-80-20-
                  1ML-5UL-220NM-90MIN.M
Last changed    : 1/13/2018 6:47:33 PM by SYSTEM
Analysis Method : E:\DATA\LGY\LGY-1-95\LGY-1-95-RE 2018-01-13 18-47-33\VWD-AS(1-6)-80-20-
                  1ML-5UL-220NM-90MIN.M (Sequence Method)
Last changed    : 4/13/2018 5:11:04 PM by SYSTEM
                  (modified after loading)
Additional Info : Peak(s) manually integrated
  
```

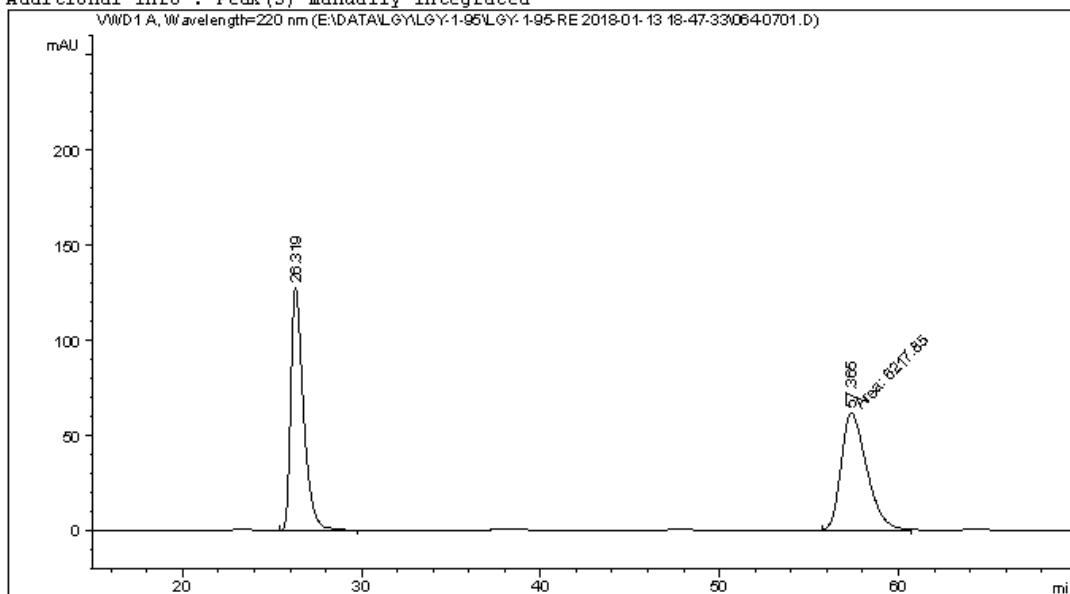

## Area Percent Report

```

Sorted By      : Signal
Multiplier     : 1.0000
Dilution       : 1.0000
Do not use Multiplier & Dilution Factor with ISTDs
  
```

Signal 1: VWD1 A, Wavelength=220 nm

| Peak # | RetTime [min] | Type | Width [min] | Area [mAU*s] | Height [mAU] | Area %  |
|--------|---------------|------|-------------|--------------|--------------|---------|
| 1      | 26.319        | BB   | 0.7423      | 6276.41748   | 127.73354    | 50.2344 |
| 2      | 57.365        | MM   | 1.6722      | 6217.85449   | 61.97150     | 49.7656 |

Totals : 1.24943e4 189.70504

\*\*\* End of Report \*\*\*

# HPLC of 2j

Data File E:\DATA\LGY\LGY-1-99\LGY-1-99 2018-01-18 18-48-43\012-0801.D  
Sample Name: LGY-1-99-5-RE-1

```
=====
Acq. Operator   : SYSTEM                               Seq. Line :    8
Acq. Instrument : 1260HPLC-VWD                       Location  : Vial 12
Injection Date  : 1/19/2018 12:35:40 AM              Inj       :    1
                                                    Inj Volume: 5.000 µl
Acq. Method     : E:\DATA\LGY\LGY-1-99\LGY-1-99 2018-01-18 18-48-43\VWD-AS(1-6)-80-20-1ML-
                  SUL-220NM-70MIN.M
Last changed    : 1/18/2018 6:48:44 PM by SYSTEM
Analysis Method : E:\DATA\LGY\LGY-1-99\LGY-1-99 2018-01-18 18-48-43\VWD-AS(1-6)-80-20-1ML-
                  SUL-220NM-70MIN.M (Sequence Method)
Last changed    : 4/13/2018 5:15:55 PM by SYSTEM
                  (modified after loading)
Additional Info : Peak(s) manually integrated
=====
```

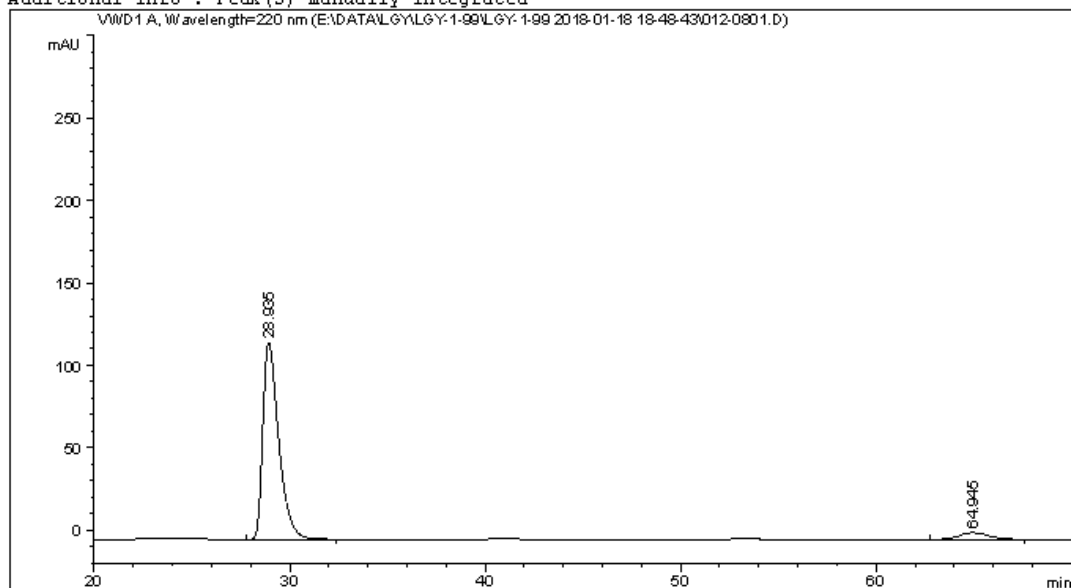

## Area Percent Report

```
Sorted By      : Signal
Multiplier     : 1.0000
Dilution       : 1.0000
Do not use Multiplier & Dilution Factor with ISTDs
```

Signal 1: VWD1 A, Wavelength=220 nm

| Peak # | RetTime [min] | Type | Width [min] | Area [mAU*s] | Height [mAU] | Area %  |
|--------|---------------|------|-------------|--------------|--------------|---------|
| 1      | 28.935        | BB   | 0.8552      | 6747.79639   | 119.24654    | 93.9898 |
| 2      | 64.945        | BB   | 1.2595      | 431.48953    | 4.03849      | 6.0102  |

Totals : 7179.28592 123.28502

\*\*\* End of Report \*\*\*

# HPLC of racemic-2k

Data File E:\DATA\YJX\YJX-1-93\YJX-1-93 2018-03-28 09-24-48\041-1301.D  
Sample Name: LGY-1-130-RA

```
=====
Acq. Operator   : SYSTEM                               Seq. Line :   13
Acq. Instrument : 1260HPLC-VWD                       Location  : Vial 41
Injection Date  : 3/28/2018 3:52:49 PM              Inj       :    1
                                                    Inj Volume: 5.000 µl
Acq. Method    : E:\DATA\YJX\YJX-1-93\YJX-1-93 2018-03-28 09-24-48\VWD-AS(1-6)-80-20-1ML-
                5UL-220NM-90MIN.M
Last changed   : 3/28/2018 9:59:05 AM by SYSTEM
Analysis Method: E:\DATA\YJX\YJX-1-93\YJX-1-93 2018-03-28 09-24-48\VWD-AS(1-6)-80-20-1ML-
                5UL-220NM-90MIN.M (Sequence Method)
Last changed   : 4/26/2018 9:45:39 PM by SYSTEM
                (modified after loading)
Additional Info : Peak(s) manually integrated
=====
```

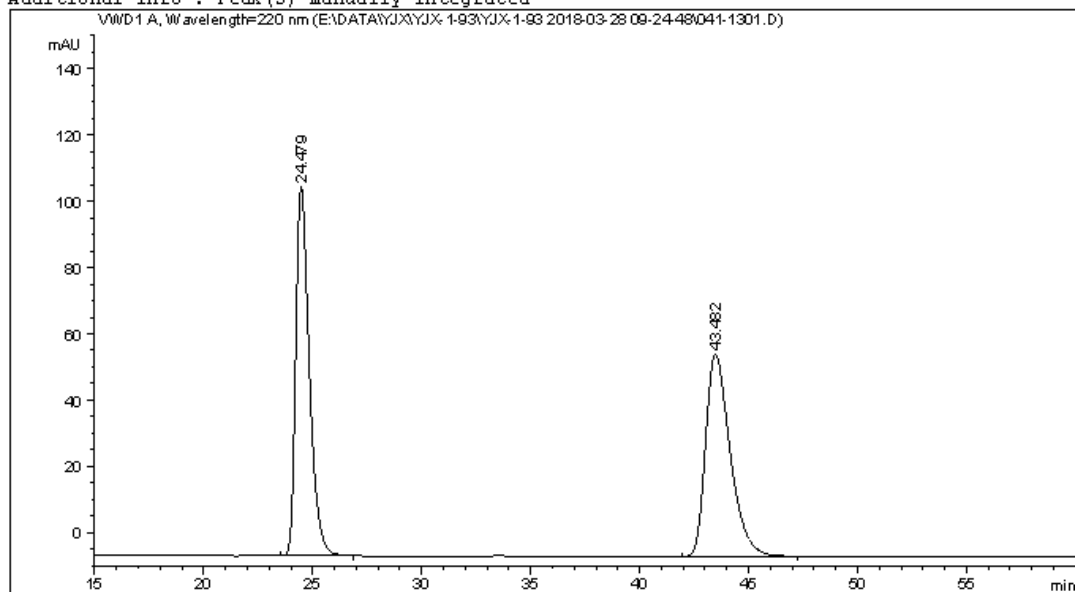

## Area Percent Report

```
Sorted By      : Signal
Multiplier     : 1.0000
Dilution      : 1.0000
Do not use Multiplier & Dilution Factor with ISTDs
```

Signal 1: VWD1 A, Wavelength=220 nm

| Peak # | RetTime [min] | Type | Width [min] | Area [mAU*s] | Height [mAU] | Area %  |
|--------|---------------|------|-------------|--------------|--------------|---------|
| 1      | 24.479        | BB   | 0.6556      | 4785.61572   | 111.09396    | 49.9677 |
| 2      | 43.482        | BB   | 1.1908      | 4791.80518   | 60.91084     | 50.0323 |

Totals : 9577.42090 172.00481

\*\*\* End of Report \*\*\*

# HPLC of 2k

Data File E:\DATA\LGY\GY-1-153\GY-1-153 2018-04-19 21-33-46\022-3301.D  
Sample Name: LGY-1-154-2

```
=====
Acq. Operator   : SYSTEM                               Seq. Line :   33
Acq. Instrument : 1260HPLC-VWD                         Location  : Vial 22
Injection Date  : 4/21/2018 12:45:12 AM              Inj       :    1
                                                    Inj Volume: 5.000 µl
Acq. Method     : E:\DATA\LGY\GY-1-153\GY-1-153 2018-04-19 21-33-46\VWD-AS (1-6)-80-20-
                  1ML-5UL-220NM-90MIN.M
Last changed    : 4/19/2018 9:33:47 PM by SYSTEM
Analysis Method : E:\DATA\LGY\GY-1-153\GY-1-153 2018-04-19 21-33-46\VWD-AS (1-6)-80-20-
                  1ML-5UL-220NM-90MIN.M (Sequence Method)
Last changed    : 4/26/2018 9:53:18 PM by SYSTEM
                  (modified after loading)
Additional Info : Peak(s) manually integrated
=====
```

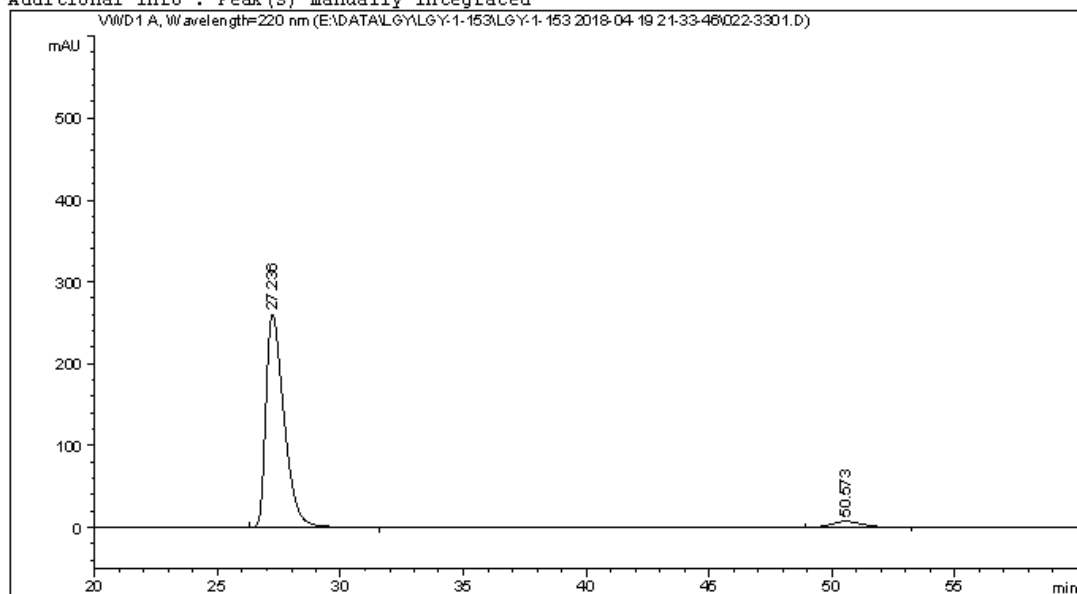

## Area Percent Report

```
Sorted By      : Signal
Multiplier     : 1.0000
Dilution       : 1.0000
Do not use Multiplier & Dilution Factor with ISTDs
```

Signal 1: VWD1 A, Wavelength=220 nm

| Peak # | RetTime [min] | Type | Width [min] | Area [mAU*s] | Height [mAU] | Area %  |
|--------|---------------|------|-------------|--------------|--------------|---------|
| 1      | 27.236        | BB   | 0.7804      | 1.32302e4    | 259.66959    | 95.8221 |
| 2      | 50.573        | BB   | 1.1083      | 576.84888    | 7.01531      | 4.1779  |

Totals : 1.38071e4 266.68490

\*\*\* End of Report \*\*\*

# HPLC of racemic-2I

Data File E:\DATA\LGY\LGY-1-161\LGY-1-161 2018-04-25 10-36-34\011-0301.D  
 Sample Name: LGY-1-161

```

=====
Acq. Operator   : SYSTEM                               Seq. Line :    3
Acq. Instrument : 1260HPLC-VWD                         Location  : Vial 11
Injection Date  : 4/25/2018 11:21:38 AM                Inj       :    1
                                                    Inj Volume: 5.000 µl
Acq. Method     : E:\DATA\LGY\LGY-1-161\LGY-1-161 2018-04-25 10-36-34\VWD-AS(1-6)-80-20-
                  1ML-5UL-220NM-90MIN.M
Last changed    : 4/25/2018 10:36:35 AM by SYSTEM
Analysis Method : E:\DATA\LGY\LGY-1-161\LGY-1-161 2018-04-25 10-36-34\VWD-AS(1-6)-80-20-
                  1ML-5UL-220NM-90MIN.M (Sequence Method)
Last changed    : 4/26/2018 9:55:57 PM by SYSTEM
                  (modified after loading)
Additional Info : Peak(s) manually integrated
  
```

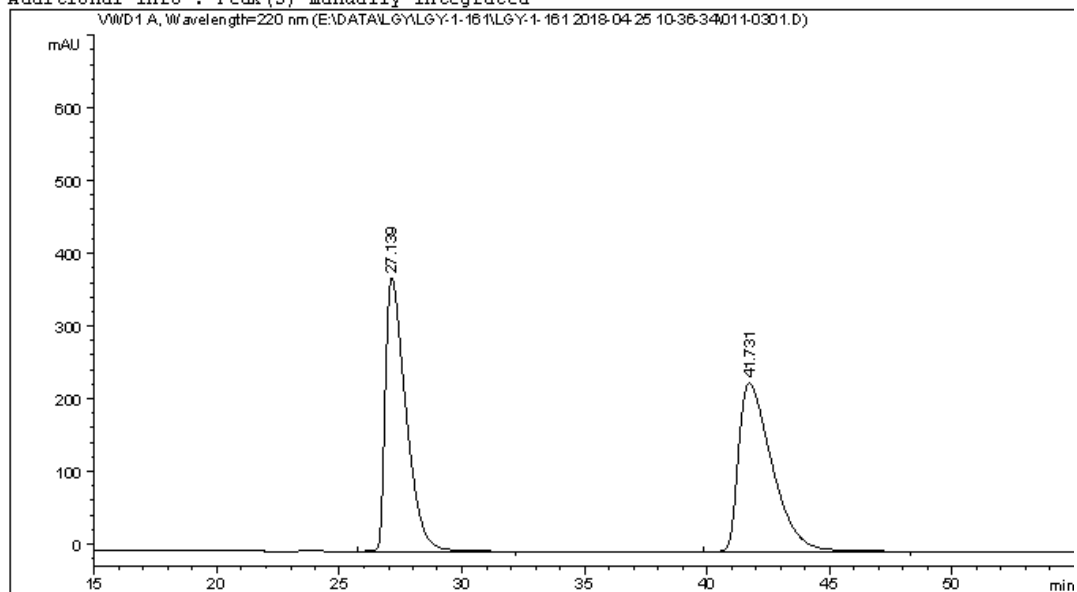

=====  
 Area Percent Report  
 =====

```

Sorted By      : Signal
Multiplier     : 1.0000
Dilution       : 1.0000
Do not use Multiplier & Dilution Factor with ISTDs
  
```

Signal 1: VWD1 A, Wavelength=220 nm

| Peak # | RetTime [min] | Type | Width [min] | Area [mAU*s] | Height [mAU] | Area %  |
|--------|---------------|------|-------------|--------------|--------------|---------|
| 1      | 27.139        | BB   | 0.8775      | 2.18521e4    | 375.71609    | 49.9349 |
| 2      | 41.731        | BB   | 1.4134      | 2.19090e4    | 231.87233    | 50.0651 |

Totals :                                    4.37611e4    607.58842

=====  
 \*\*\* End of Report \*\*\*



# HPLC of 21

Data File E:\DATA\LGY\LGY-1-162\LGY-1-162 2018-04-26 14-42-05\072-0401.D  
Sample Name: LGY-1-162-2

```
=====
Acq. Operator   : SYSTEM                               Seq. Line :    4
Acq. Instrument : 1260HPLC-VWD                         Location  : Vial 72
Injection Date  : 4/26/2018 4:25:20 PM                Inj       :    1
                                                    Inj Volume: 5.000 µl
Acq. Method     : E:\DATA\LGY\LGY-1-162\LGY-1-162 2018-04-26 14-42-05\VWD-AS(1-6)-80-20-
                  LML-5UL-220NM-60MIN.M
Last changed    : 4/26/2018 2:42:05 PM by SYSTEM
Analysis Method : E:\DATA\LGY\LGY-1-162\LGY-1-162 2018-04-26 14-42-05\VWD-AS(1-6)-80-20-
                  LML-5UL-220NM-60MIN.M (Sequence Method)
Last changed    : 4/26/2018 10:00:14 PM by SYSTEM
                  (modified after loading)
Additional Info : Peak(s) manually integrated
=====
```

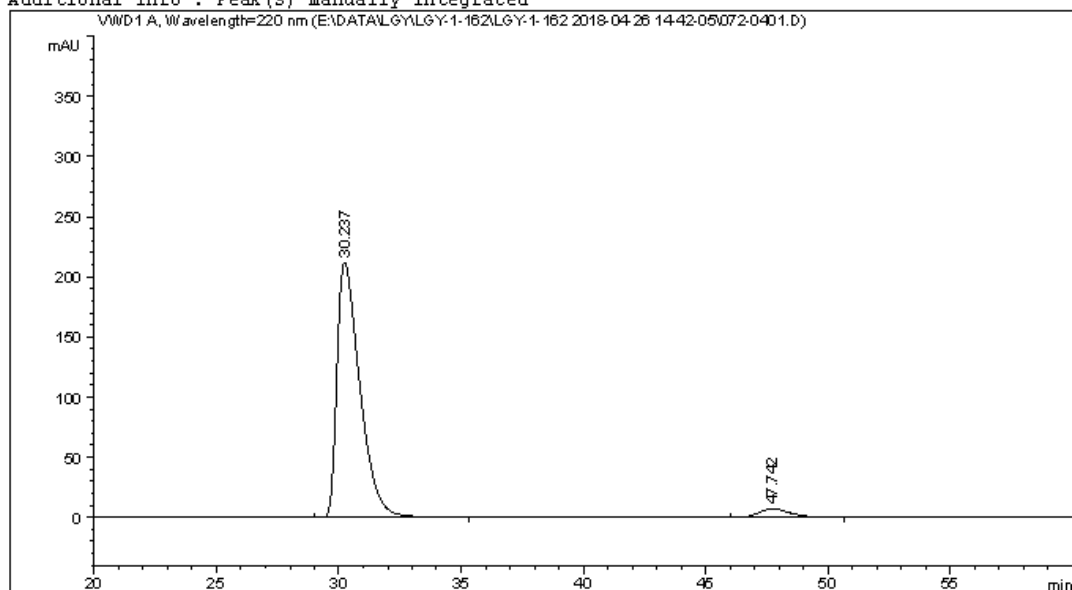

## Area Percent Report

```
Sorted By      : Signal
Multiplier     : 1.0000
Dilution      : 1.0000
Do not use Multiplier & Dilution Factor with ISTDs
```

Signal 1: VWD1 A, Wavelength=220 nm

| Peak # | RetTime [min] | Type | Width [min] | Area [mAU*s] | Height [mAU] | Area %  |
|--------|---------------|------|-------------|--------------|--------------|---------|
| 1      | 30.237        | BB   | 0.9804      | 1.37557e4    | 212.17484    | 95.6042 |
| 2      | 47.742        | BB   | 1.2271      | 632.47974    | 7.19835      | 4.3958  |

Totals : 1.43881e4 219.37319

\*\*\* End of Report \*\*\*

# HPLC of racemic-2m

Data File E:\DATA\WSW\WSW-2-162-RACE-2\XZC-171205-1 2017-12-06 09-37-46\002-0801.D  
 Sample Name: LGY-1-47

```

=====
Acq. Operator   : SYSTEM                      Seq. Line :    8
Acq. Instrument : 1260HPLC-VWD                Location  : Vial 2
Injection Date  : 12/6/2017 1:15:36 PM        Inj       :    1
                                           Inj Volume: 5.000 µl
Acq. Method     : E:\DATA\WSW\WSW-2-162-RACE-2\XZC-171205-1 2017-12-06 09-37-46\VWD-AS(1-6
                  )-80-20-1ML-5UL-220NM-100MIN.M
Last changed    : 12/6/2017 9:52:57 AM by SYSTEM
Analysis Method : E:\DATA\WSW\WSW-2-162-RACE-2\XZC-171205-1 2017-12-06 09-37-46\VWD-AS(1-6
                  )-80-20-1ML-5UL-220NM-100MIN.M (Sequence Method)
Last changed    : 4/13/2018 5:20:12 PM by SYSTEM
                  (modified after loading)
Additional Info : Peak(s) manually integrated
  
```

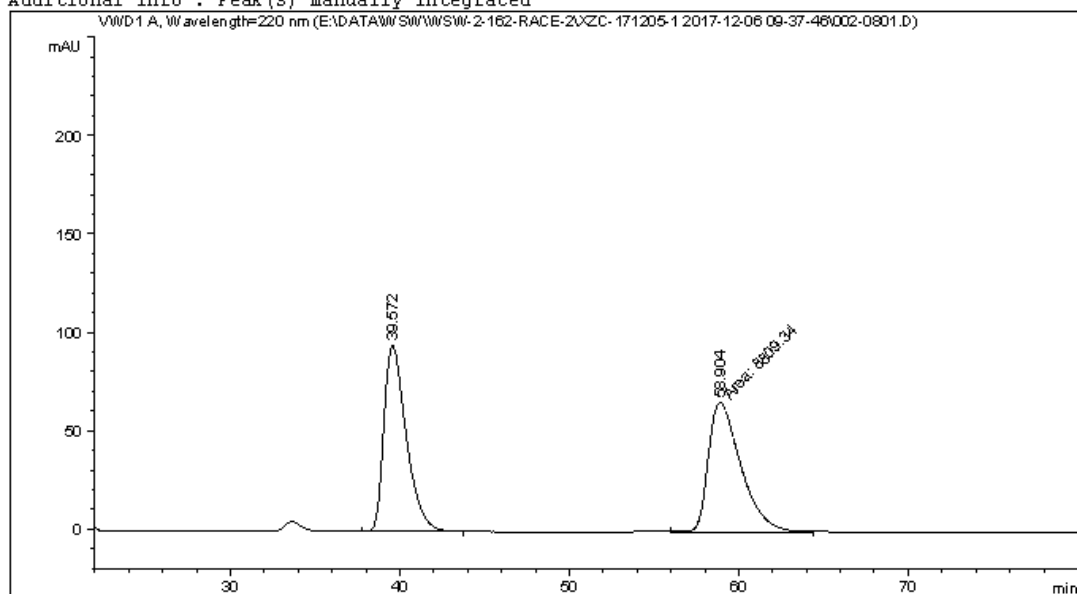

=====  
 Area Percent Report  
 =====

```

Sorted By      : Signal
Multiplier     : 1.0000
Dilution       : 1.0000
Do not use Multiplier & Dilution Factor with ISTDs
  
```

Signal 1: VWD1 A, Wavelength=220 nm

| Peak # | RetTime [min] | Type | Width [min] | Area [mAU*s] | Height [mAU] | Area %  |
|--------|---------------|------|-------------|--------------|--------------|---------|
| 1      | 39.572        | BB   | 1.3921      | 8682.41602   | 94.48367     | 49.6372 |
| 2      | 58.904        | MM   | 2.2334      | 8809.33691   | 65.74026     | 50.3628 |

Totals : 1.74918e4 160.22394

=====  
 \*\*\* End of Report \*\*\*

# HPLC of 2m

Data File E:\DATA\LGY\LGY-1-93\LGY-1-93 2018-01-04 11-23-37\023-1201.D  
Sample Name: LGY-1-92-4

```
=====
Acq. Operator   : SYSTEM                               Seq. Line : 12
Acq. Instrument : 1260HPLC-VWD                         Location  : Vial 23
Injection Date  : 1/4/2018 7:00:13 PM                 Inj       : 1
                                                    Inj Volume: 5.000 µl
Acq. Method     : E:\DATA\LGY\LGY-1-93\LGY-1-93 2018-01-04 11-23-37\VWD-AS(1-6)-80-20-1ML-
                  SUL-220NM-70MIN.M
Last changed    : 1/4/2018 11:27:15 AM by SYSTEM
Analysis Method : E:\DATA\LGY\LGY-1-93\LGY-1-93 2018-01-04 11-23-37\VWD-AS(1-6)-80-20-1ML-
                  SUL-220NM-70MIN.M (Sequence Method)
Last changed    : 4/13/2018 5:25:11 PM by SYSTEM
                  (modified after loading)
Additional Info : Peak(s) manually integrated
=====
```

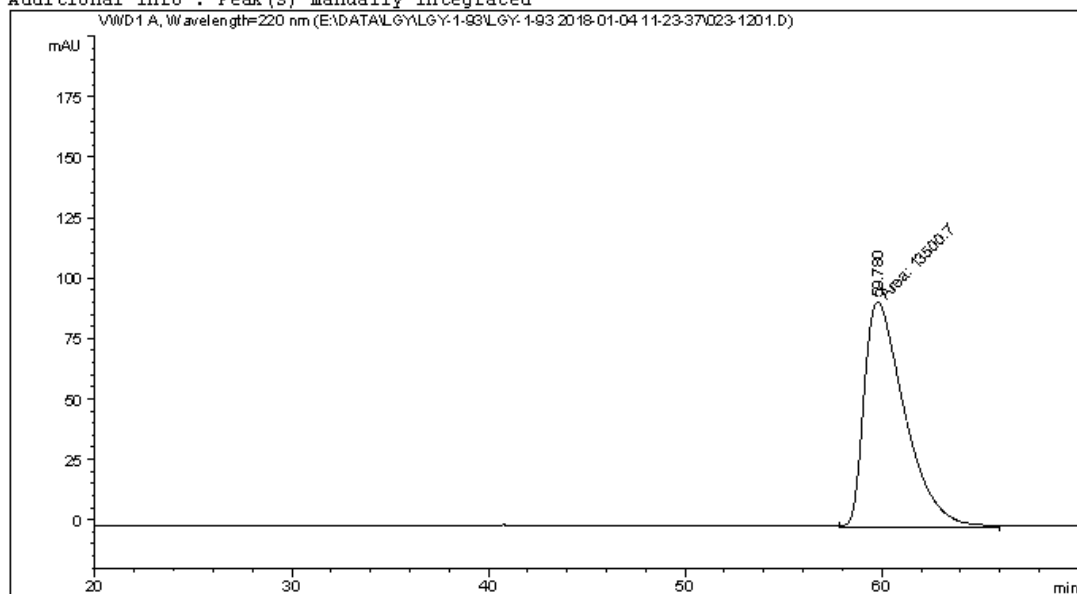

## Area Percent Report

```
Sorted By      : Signal
Multiplier     : 1.0000
Dilution       : 1.0000
Do not use Multiplier & Dilution Factor with ISTDs
```

Signal 1: VWD1 A, Wavelength=220 nm

| Peak # | RetTime [min] | Type | Width [min] | Area [mAU*s] | Height [mAU] | Area %   |
|--------|---------------|------|-------------|--------------|--------------|----------|
| 1      | 59.780        | MM   | 2.4132      | 1.35007e4    | 93.24097     | 100.0000 |

Totals : 1.35007e4 93.24097

\*\*\* End of Report \*\*\*

# HPLC of racemic-2n

Data File E:\DATA\LGY\LGY-1-53-RE-3\LGY-1-53-RE-3 2017-12-01 08-52-48\002-0401.D  
Sample Name: LGY-1-54

```
=====
Acq. Operator   : SYSTEM                               Seq. Line :    4
Acq. Instrument : 1260HPLC-VWD                         Location  : Vial 2
Injection Date  : 12/1/2017 11:08:34 AM                Inj       :    1
                                                    Inj Volume: 5.000 µl
Acq. Method     : E:\DATA\LGY\LGY-1-53-RE-3\LGY-1-53-RE-3 2017-12-01 08-52-48\VWD-AS(1-6)-
                  80-20-1ML-5UL-220NM-120MIN.M
Last changed    : 12/1/2017 8:52:49 AM by SYSTEM
Analysis Method : E:\DATA\LGY\LGY-1-53-RE-3\LGY-1-53-RE-3 2017-12-01 08-52-48\VWD-AS(1-6)-
                  80-20-1ML-5UL-220NM-120MIN.M (Sequence Method)
Last changed    : 4/13/2018 5:26:51 PM by SYSTEM
                  (modified after loading)
Additional Info : Peak(s) manually integrated
=====
```

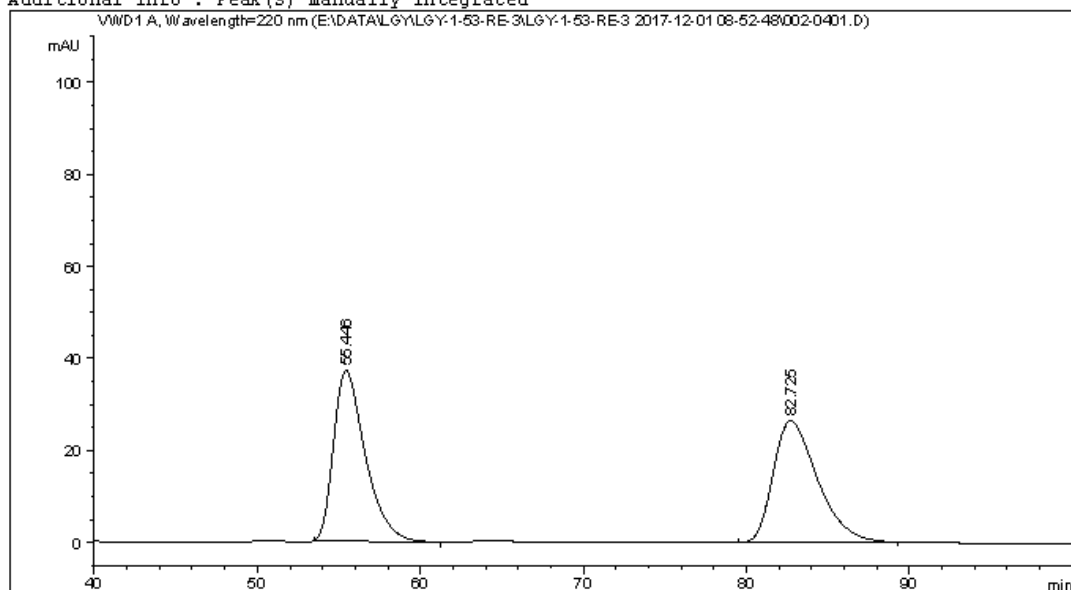

## Area Percent Report

```
Sorted By      : Signal
Multiplier     : 1.0000
Dilution       : 1.0000
Do not use Multiplier & Dilution Factor with ISTDs
```

Signal 1: VWD1 A, Wavelength=220 nm

| Peak # | RetTime [min] | Type | Width [min] | Area [mAU*s] | Height [mAU] | Area %  |
|--------|---------------|------|-------------|--------------|--------------|---------|
| 1      | 55.446        | BB   | 1.8387      | 5016.63232   | 37.12011     | 49.9658 |
| 2      | 82.725        | BB   | 2.5774      | 5023.49561   | 26.50241     | 50.0342 |

Totals : 1.00401e4 63.62252

\*\*\* End of Report \*\*\*

# HPLC of 2n

Data File E:\DATA\LGY\LGY-1-95\LGY-1-95 2018-01-11 09-00-29\041-1501.D  
Sample Name: LGY-1-95-1

```
=====
Acq. Operator   : SYSTEM                      Seq. Line : 15
Acq. Instrument : 1260HPLC-VWD                Location  : Vial 41
Injection Date  : 1/11/2018 3:18:34 PM        Inj       : 1
                                           Inj Volume: 5.000 µl
Acq. Method     : E:\DATA\LGY\LGY-1-95\LGY-1-95 2018-01-11 09-00-29\VWD-AS(1-6)-80-20-1ML-
                    SUL-220NM-100MIN.M
Last changed    : 1/11/2018 9:00:30 AM by SYSTEM
Analysis Method : E:\DATA\LGY\LGY-1-95\LGY-1-95 2018-01-11 09-00-29\VWD-AS(1-6)-80-20-1ML-
                    SUL-220NM-100MIN.M (Sequence Method)
Last changed    : 4/13/2018 5:44:37 PM by SYSTEM
                    (modified after loading)
Additional Info : Peak(s) manually integrated
=====
```

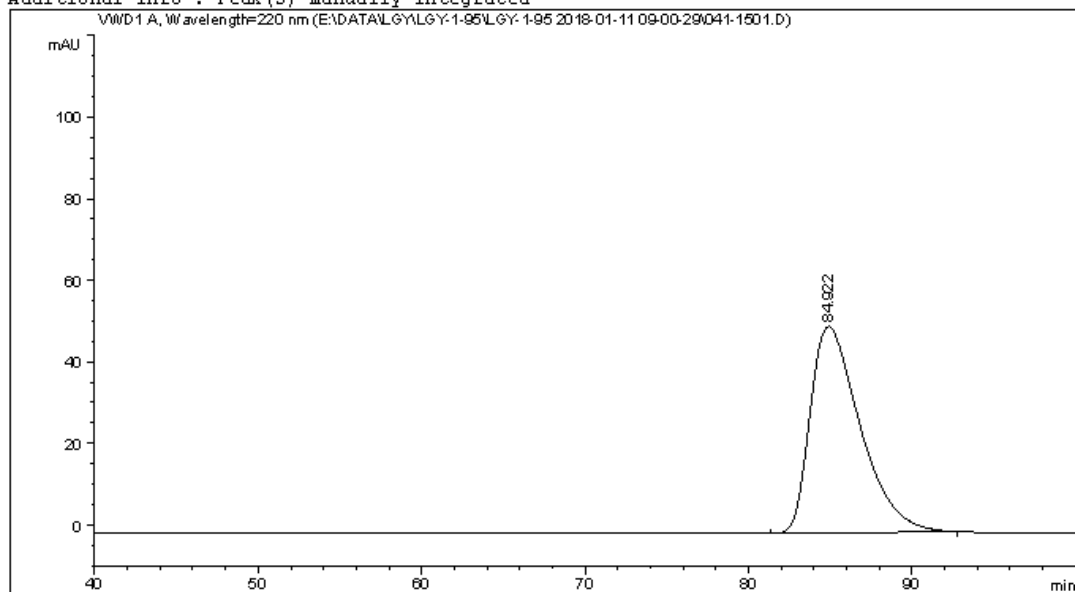

## Area Percent Report

```
Sorted By      : Signal
Multiplier     : 1.0000
Dilution       : 1.0000
Do not use Multiplier & Dilution Factor with ISTDs
```

Signal 1: VWD1 A, Wavelength=220 nm

| Peak # | RetTime [min] | Type | Width [min] | Area [mAU*s] | Height [mAU] | Area %   |
|--------|---------------|------|-------------|--------------|--------------|----------|
| 1      | 84.922        | BB   | 2.6560      | 1.07293e4    | 50.53551     | 100.0000 |

Totals : 1.07293e4 50.53551

\*\*\* End of Report \*\*\*

# HPLC of racemic-2o

Data File E:\DATA\LGY\LGY-1-72-RACE\YJX-1-19-0 2017-12-16 19-17-14\002-0401.D  
Sample Name: LGY-1-72-2

```
=====
Acq. Operator   : SYSTEM                               Seq. Line :    4
Acq. Instrument : 1260HPLC-VWD                       Location  : Vial 2
Injection Date  : 12/16/2017 9:11:48 PM              Inj       :    1
                                                    Inj Volume: 5.000 µl
Acq. Method     : E:\DATA\LGY\LGY-1-72-RACE\YJX-1-19-0 2017-12-16 19-17-14\VWD-AS(1-6)-80-
                20-1ML-SUL-220NM-70MIN.M
Last changed    : 12/16/2017 7:17:15 PM by SYSTEM
Analysis Method : E:\DATA\LGY\LGY-1-72-RACE\YJX-1-19-0 2017-12-16 19-17-14\VWD-AS(1-6)-80-
                20-1ML-SUL-220NM-70MIN.M (Sequence Method)
Last changed    : 4/14/2018 7:46:00 PM by SYSTEM
                (modified after loading)
Additional Info : Peak(s) manually integrated
=====
```

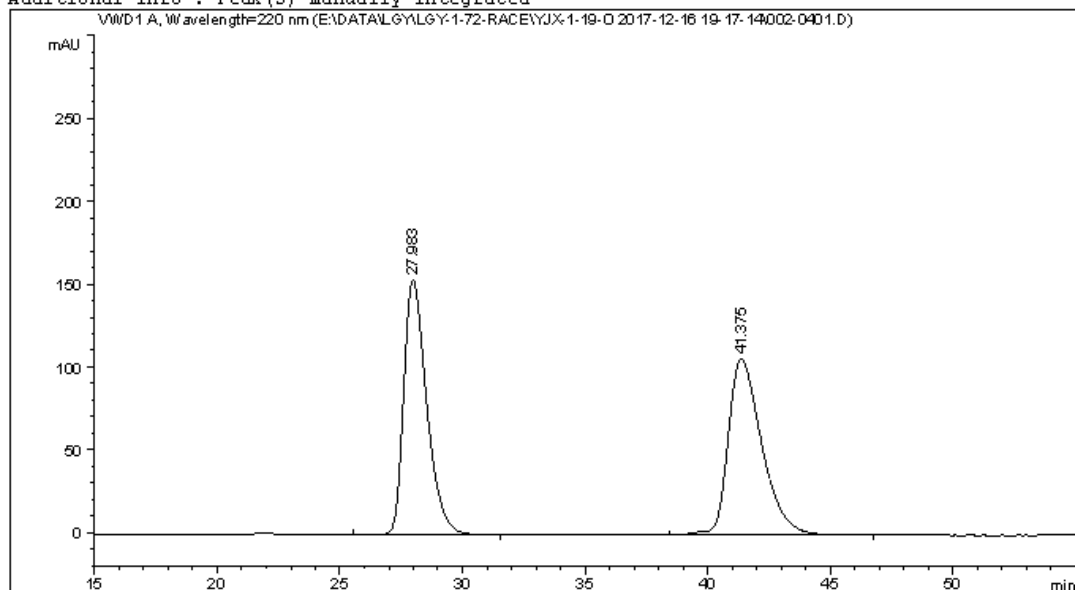

```
=====
                          Area Percent Report
=====
```

```
Sorted By      :      Signal
Multiplier     :      1.0000
Dilution      :      1.0000
Do not use Multiplier & Dilution Factor with ISTDs
```

Signal 1: VWD1 A, Wavelength=220 nm

| Peak # | RetTime [min] | Type | Width [min] | Area [mAU*s] | Height [mAU] | Area %  |
|--------|---------------|------|-------------|--------------|--------------|---------|
| 1      | 27.983        | BB   | 0.9959      | 9999.52246   | 153.72369    | 49.6051 |
| 2      | 41.375        | BB   | 1.4506      | 1.01587e4    | 106.13880    | 50.3949 |

```
Totals :                      2.01583e4  259.86250
```

```
=====
                          *** End of Report ***
=====
```

# HPLC of 2o

Data File E:\DATA\LGY\LGY-1-95\LGY-1-95-RE 2018-01-13 09-06-53\042-0501.D  
Sample Name: LGY-1-95-4-RE

```
=====
Acq. Operator   : SYSTEM                      Seq. Line :    5
Acq. Instrument : 1260HPLC-VWD                Location  : Vial 42
Injection Date  : 1/13/2018 11:55:11 AM      Inj       :    1
                                           Inj Volume: 5.000 µl
Acq. Method     : E:\DATA\LGY\LGY-1-95\LGY-1-95-RE 2018-01-13 09-06-53\VWD-AS(1-6)-80-20-
                  1ML-5UL-220NM-60MIN.M
Last changed    : 1/13/2018 9:06:54 AM by SYSTEM
Analysis Method : E:\DATA\LGY\LGY-1-95\LGY-1-95-RE 2018-01-13 09-06-53\VWD-AS(1-6)-80-20-
                  1ML-5UL-220NM-60MIN.M (Sequence Method)
Last changed    : 4/14/2018 7:50:03 PM by SYSTEM
                  (modified after loading)
Additional Info : Peak(s) manually integrated
=====
```

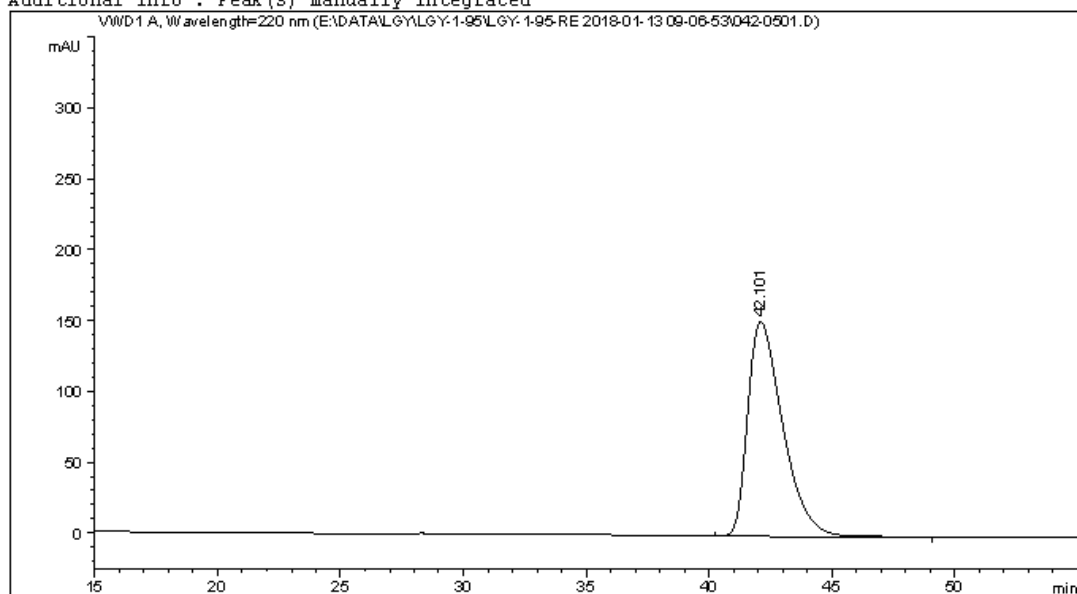

```
=====
                          Area Percent Report
=====
```

```
Sorted By      :      Signal
Multiplier     :      1.0000
Dilution       :      1.0000
Do not use Multiplier & Dilution Factor with ISTDs
```

Signal 1: VWD1 A, Wavelength=220 nm

| Peak # | RetTime [min] | Type | Width [min] | Area [mAU*s] | Height [mAU] | Area %   |
|--------|---------------|------|-------------|--------------|--------------|----------|
| 1      | 42.101        | BB   | 1.5028      | 1.50565e4    | 151.58403    | 100.0000 |

Totals :                    1.50565e4   151.58403

```
=====
*** End of Report ***
=====
```

# HPLC of racemic-2p

Data File E:\DATA\LGY\LGY-1-53-RE-3\LGY-1-53-RE-3 2017-12-01 08-52-48\003-0601.D  
 Sample Name: LGY-1-55

```

=====
Acq. Operator   : SYSTEM                               Seq. Line :    6
Acq. Instrument : 1260HPLC-VWD                          Location  : Vial 3
Injection Date  : 12/1/2017 1:20:12 PM                 Inj       :    1
                                                    Inj Volume: 5.000 µl
Acq. Method     : E:\DATA\LGY\LGY-1-53-RE-3\LGY-1-53-RE-3 2017-12-01 08-52-48\VWD-AS(1-6)-
                  80-20-1ML-5UL-220NM-120MIN.M
Last changed    : 12/1/2017 8:52:49 AM by SYSTEM
Analysis Method : E:\DATA\LGY\LGY-1-53-RE-3\LGY-1-53-RE-3 2017-12-01 08-52-48\VWD-AS(1-6)-
                  80-20-1ML-5UL-220NM-120MIN.M (Sequence Method)
Last changed    : 4/14/2018 7:53:32 PM by SYSTEM
                  (modified after loading)
Additional Info : Peak(s) manually integrated
  
```

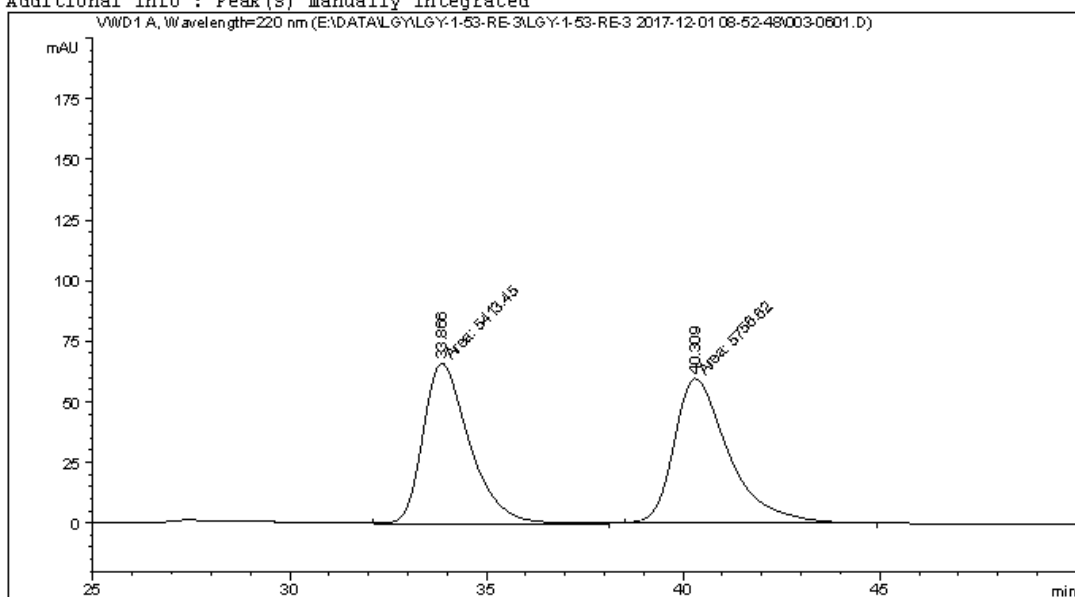

## Area Percent Report

```

Sorted By      : Signal
Multiplier     : 1.0000
Dilution       : 1.0000
Do not use Multiplier & Dilution Factor with ISTDs
  
```

Signal 1: VWD1 A, Wavelength=220 nm

| Peak # | RetTime [min] | Type | Width [min] | Area [mAU*s] | Height [mAU] | Area %  |
|--------|---------------|------|-------------|--------------|--------------|---------|
| 1      | 33.866        | MM   | 1.3651      | 5413.44727   | 66.09346     | 48.4639 |
| 2      | 40.309        | MM   | 1.6109      | 5756.62109   | 59.55768     | 51.5361 |

Totals : 1.11701e4 125.65114

\*\*\* End of Report \*\*\*



# HPLC of 2p

Data File E:\DATA\LGY\LGY-1-99\LGY-1-99 2018-01-18 18-48-43\011-0701.D  
Sample Name: LGY-1-99-4-RE-1

```
=====
Acq. Operator   : SYSTEM                      Seq. Line :    7
Acq. Instrument : 1260HPLC-VWD                Location  : Vial 11
Injection Date  : 1/18/2018 11:34:54 PM      Inj       :    1
                                           Inj Volume: 5.000 µl
Acq. Method     : E:\DATA\LGY\LGY-1-99\LGY-1-99 2018-01-18 18-48-43\VWD-AS(1-6)-80-20-1ML-
                  SUL-220NM-60MIN.M
Last changed    : 1/18/2018 6:48:44 PM by SYSTEM
Analysis Method : E:\DATA\LGY\LGY-1-99\LGY-1-99 2018-01-18 18-48-43\VWD-AS(1-6)-80-20-1ML-
                  SUL-220NM-60MIN.M (Sequence Method)
Last changed    : 4/14/2018 7:57:47 PM by SYSTEM
                  (modified after loading)
Additional Info : Peak(s) manually integrated
=====
```

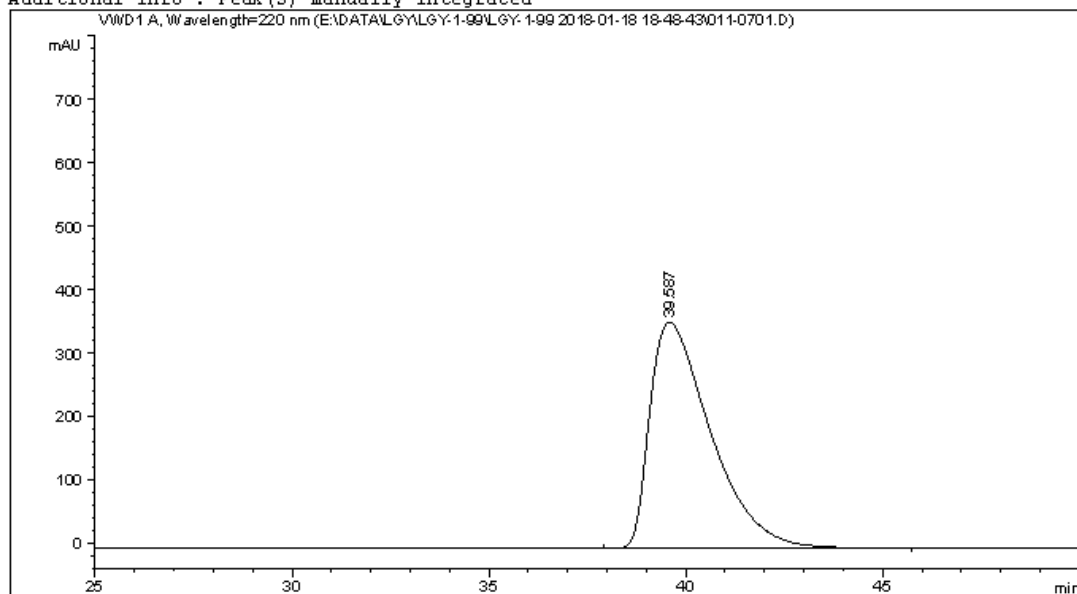

## Area Percent Report

```
Sorted By      : Signal
Multiplier     : 1.0000
Dilution       : 1.0000
Do not use Multiplier & Dilution Factor with ISTDs
```

Signal 1: VWD1 A, Wavelength=220 nm

| Peak # | RetTime [min] | Type | Width [min] | Area [mAU*s] | Height [mAU] | Area %   |
|--------|---------------|------|-------------|--------------|--------------|----------|
| 1      | 39.587        | BB   | 1.6551      | 3.82501e4    | 356.39026    | 100.0000 |

Totals :                    3.82501e4   356.39026

\*\*\* End of Report \*\*\*

# HPLC of racemic-2q

Data File D:\DATA\LGY\GY-2-73-RE\GY-2-73-RE 2018-09-07 16-23-54\031-2701.D  
Sample Name: LGY-2-32-RE

```
=====
Acq. Operator   :                               Seq. Line : 27
Acq. Instrument : Instrument 1                   Location  : Vial 31
Injection Date  : 9/8/2018 2:57:05 PM           Inj       : 1
                                                    Inj Volume: 5.000 µl

Acq. Method     : D:\DATA\LGY\GY-2-73-RE\GY-2-73-RE 2018-09-07 16-23-54\VWD-AS(1-6)-80-20-
                  1ML-5UL-220NM-60MIN.M
Last changed    : 5/31/2018 10:45:35 AM
Analysis Method : D:\METHOD\LG\VWD-AD(1-2)-99-1-0.2ML-2UL-220NM-10MIN.M
Last changed    : 9/10/2018 10:22:01 PM
                  (modified after loading)
Additional Info : Peak(s) manually integrated
=====
```

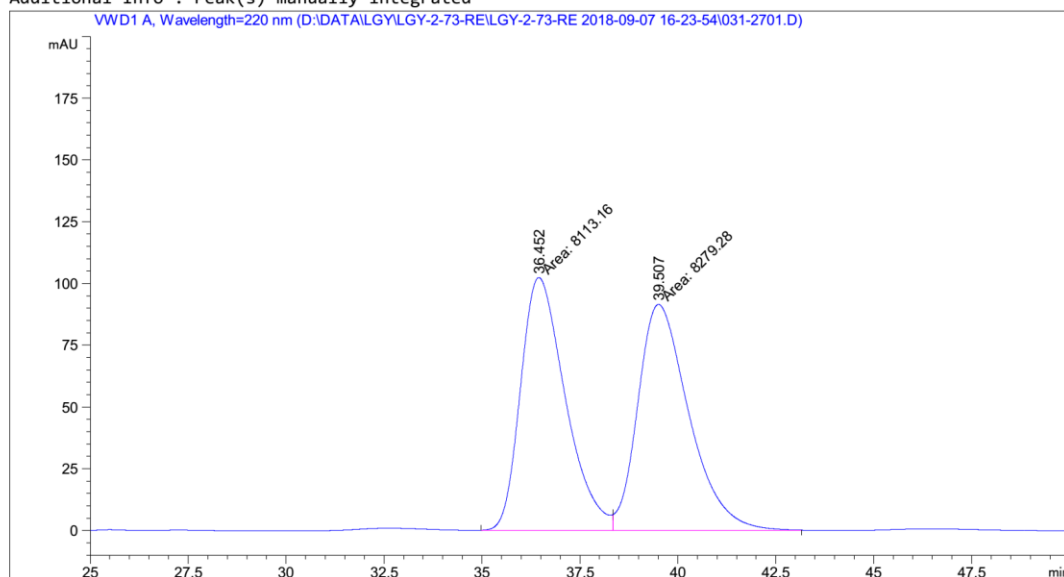

## Area Percent Report

```
Sorted By      :      Retention Time
Multiplier     :      1.0000
Dilution       :      1.0000
Use Multiplier & Dilution Factor with ISTDs
```

Signal 1: VWD1 A, Wavelength=220 nm

| Peak # | RetTime [min] | Sig | Type | Area [mAU*s] | Height [mAU] | Area %  |
|--------|---------------|-----|------|--------------|--------------|---------|
| 1      | 36.452        | 1   | MF   | 8113.15771   | 102.32407    | 49.4933 |
| 2      | 39.507        | 1   | FM   | 8279.27539   | 91.44144     | 50.5067 |

Totals : 1.63924e4 193.76551

# HPLC of 2q

Data File D:\DATA\LGY\LGY-2-73-RE\LGY-2-73-RE 2018-09-07 16-23-54\032-2801.D  
 Sample Name: LGY-2-73-7

```

=====
Acq. Operator   :                               Seq. Line :   28
Acq. Instrument : Instrument 1                 Location  : Vial 32
Injection Date  : 9/8/2018 3:57:57 PM        Inj       :    1
                                                Inj Volume: 5.000 µl

Acq. Method     : D:\DATA\LGY\LGY-2-73-RE\LGY-2-73-RE 2018-09-07 16-23-54\VWD-AS(1-6)-80-20-
                  1ML-5UL-220NM-60MIN.M
Last changed    : 9/8/2018 4:51:09 PM
                  (modified after loading)
Analysis Method : D:\METHOD\LG\VWD-AD(1-2)-99-1-0.2ML-2UL-220NM-10MIN.M
Last changed    : 9/10/2018 10:24:16 PM
                  (modified after loading)
Additional Info  : Peak(s) manually integrated
  
```

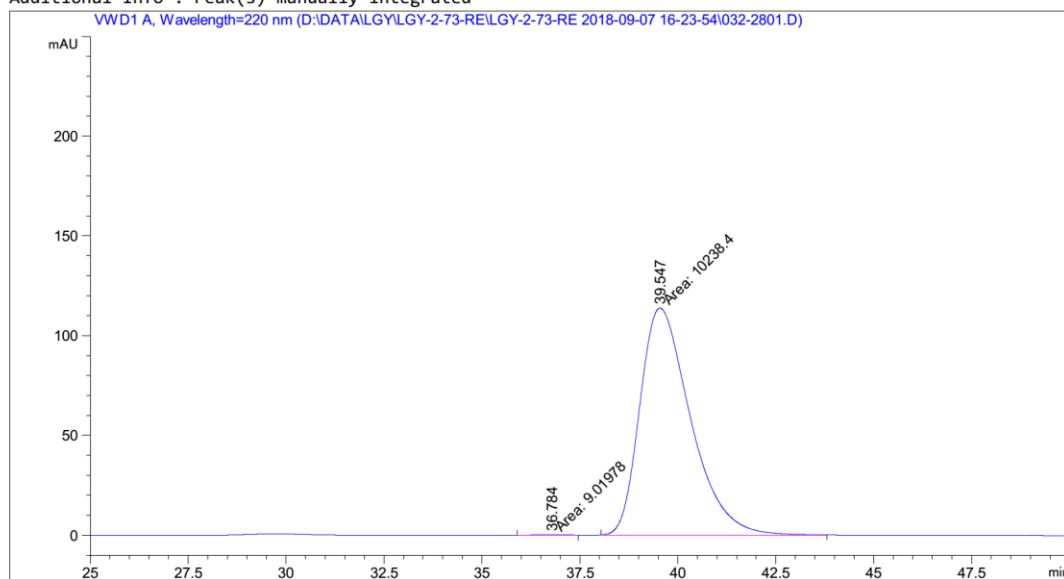

## Area Percent Report

```

Sorted By      :      Retention Time
Multiplier     :      1.0000
Dilution       :      1.0000
Use Multiplier & Dilution Factor with ISTDs
  
```

Signal 1: VWD1 A, Wavelength=220 nm

| Peak # | RetTime [min] | Sig | Type | Area [mAU*s] | Height [mAU] | Area %  |
|--------|---------------|-----|------|--------------|--------------|---------|
| 1      | 36.784        | 1   | MM   | 9.01978      | 1.69177e-1   | 0.0880  |
| 2      | 39.547        | 1   | MM   | 1.02384e4    | 113.83140    | 99.9120 |

Totals :                    1.02474e4    114.00058

# HPLC of racemic-2r

Data File E:\DATA\LGY\LGY-1-95\LGY-1-95-RE 2018-01-13 18-47-33\065-0801.D  
Sample Name: LGY-1-53-RA

```
=====
Acq. Operator   : SYSTEM                               Seq. Line :    8
Acq. Instrument : 1260HPLC-VWD                         Location  : Vial 65
Injection Date  : 1/14/2018 4:24:33 AM                 Inj       :    1
                                                    Inj Volume: 5.000 µl
Acq. Method     : E:\DATA\LGY\LGY-1-95\LGY-1-95-RE 2018-01-13 18-47-33\VWD-AS(1-6)-80-20-
                  LML-5UL-220NM-90MIN.M
Last changed    : 1/13/2018 6:47:33 PM by SYSTEM
Analysis Method : E:\DATA\LGY\LGY-1-95\LGY-1-95-RE 2018-01-13 18-47-33\VWD-AS(1-6)-80-20-
                  LML-5UL-220NM-90MIN.M (Sequence Method)
Last changed    : 4/13/2018 9:31:55 PM by SYSTEM
                  (modified after loading)
Additional Info : Peak(s) manually integrated
=====
```

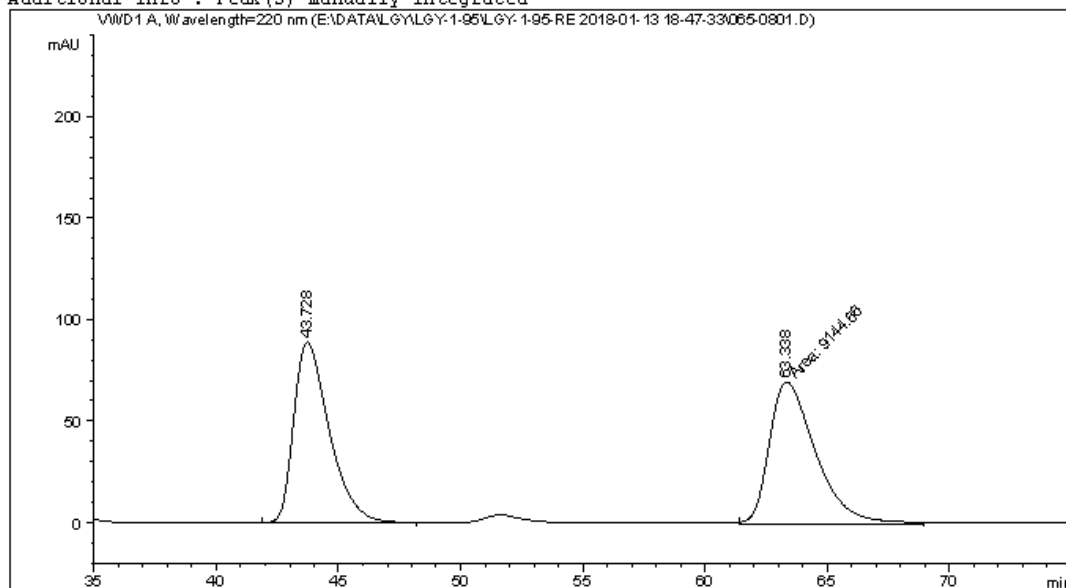

## Area Percent Report

```
=====
Sorted By      : Signal
Multiplier     : 1.0000
Dilution       : 1.0000
Do not use Multiplier & Dilution Factor with ISTDs
=====
```

Signal 1: VWD1 A, Wavelength=220 nm

| Peak # | RetTime [min] | Type | Width [min] | Area [mAU*s] | Height [mAU] | Area %  |
|--------|---------------|------|-------------|--------------|--------------|---------|
| 1      | 43.728        | BB   | 1.5127      | 8898.92871   | 88.68528     | 49.3191 |
| 2      | 63.338        | MM   | 2.1875      | 9144.65723   | 69.67457     | 50.6809 |

Totals : 1.80436e4 158.35985

\*\*\* End of Report \*\*\*

# HPLC of 2r

Data File E:\DATA\LGY\LGY-1-95-2\LGY-1-95-2-RE 2018-05-07 07-47-01\063-0201.D  
Sample Name: LGY-1-95-2-RE

```
=====
Acq. Operator   : SYSTEM                      Seq. Line :    2
Acq. Instrument : 1260HPLC-VWD                Location  : Vial 63
Injection Date  : 5/7/2018 8:01:28 AM         Inj       :    1
                                           Inj Volume: 5.000 µl
Acq. Method     : E:\DATA\LGY\LGY-1-95-2\LGY-1-95-2-RE 2018-05-07 07-47-01\VWD-AS(1-6)-80-
                20-1ML-5UL-220NM-90MIN.M
Last changed    : 5/7/2018 7:47:01 AM by SYSTEM
Analysis Method : E:\DATA\LGY\LGY-1-95-2\LGY-1-95-2-RE 2018-05-07 07-47-01\VWD-AS(1-6)-80-
                20-1ML-5UL-220NM-90MIN.M (Sequence Method)
Last changed    : 5/7/2018 7:15:25 PM by SYSTEM
                (modified after loading)
Additional Info : Peak(s) manually integrated
=====
```

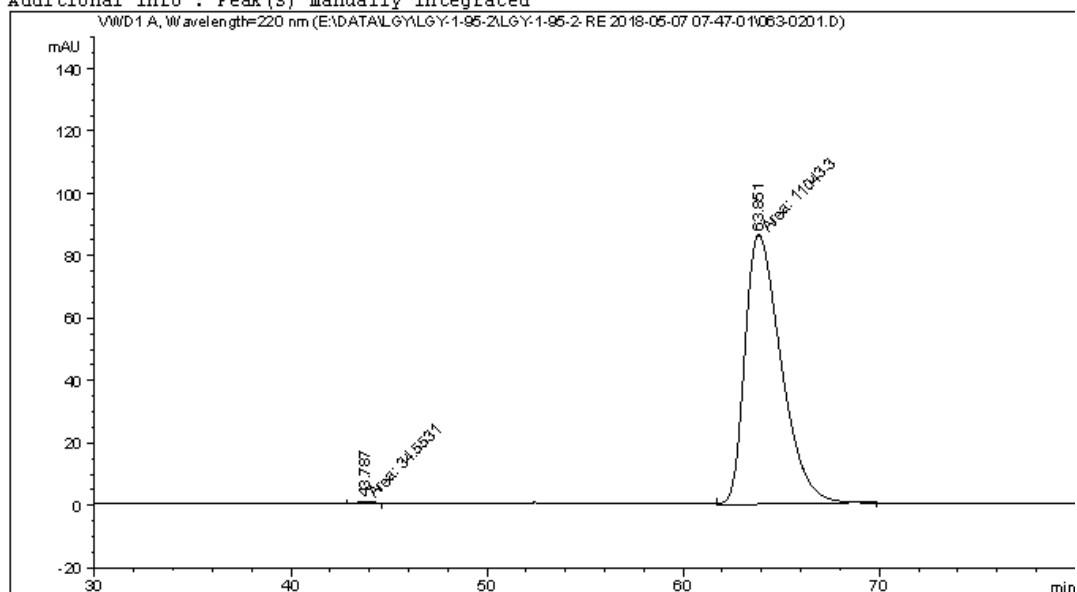

## Area Percent Report

```
Sorted By      : Signal
Multiplier     : 1.0000
Dilution       : 1.0000
Do not use Multiplier & Dilution Factor with ISTDs
```

Signal 1: VWD1 A, Wavelength=220 nm

| Peak # | RetTime [min] | Type | Width [min] | Area [mAU*s] | Height [mAU] | Area %  |
|--------|---------------|------|-------------|--------------|--------------|---------|
| 1      | 43.787        | MM   | 0.6485      | 34.55308     | 6.31873e-1   | 0.3119  |
| 2      | 63.851        | MM   | 2.1334      | 1.10433e4    | 86.27399     | 99.6881 |

Totals : 1.10778e4 86.90586

\*\*\* End of Report \*\*\*

# HPLC of racemic-2s

Data File D:\DATA\LGY\LGY-2-73-RE\LGY-2-73-RE 2018-09-07 16-23-54\011-1101.D  
 Sample Name: LGY-2-62-2

```

=====
Acq. Operator   :                               Seq. Line :   11
Acq. Instrument : Instrument 1                  Location  : Vial 11
Injection Date  : 9/8/2018 1:33:26 AM          Inj       :    1
                                                    Inj Volume: 5.000 µl

Acq. Method     : D:\DATA\LGY\LGY-2-73-RE\LGY-2-73-RE 2018-09-07 16-23-54\VWD-AS(1-6)-80-20-
                  1ML-5UL-220NM-80MIN.M
Last changed    : 5/26/2018 3:44:58 PM
Analysis Method : D:\METHOD\LGY\VWD-AD(1-2)-95-5-0.3ML-5UL-220NM-100MIN.M
Last changed    : 9/10/2018 9:48:14 PM
                  (modified after loading)
Additional Info  : Peak(s) manually integrated
  
```

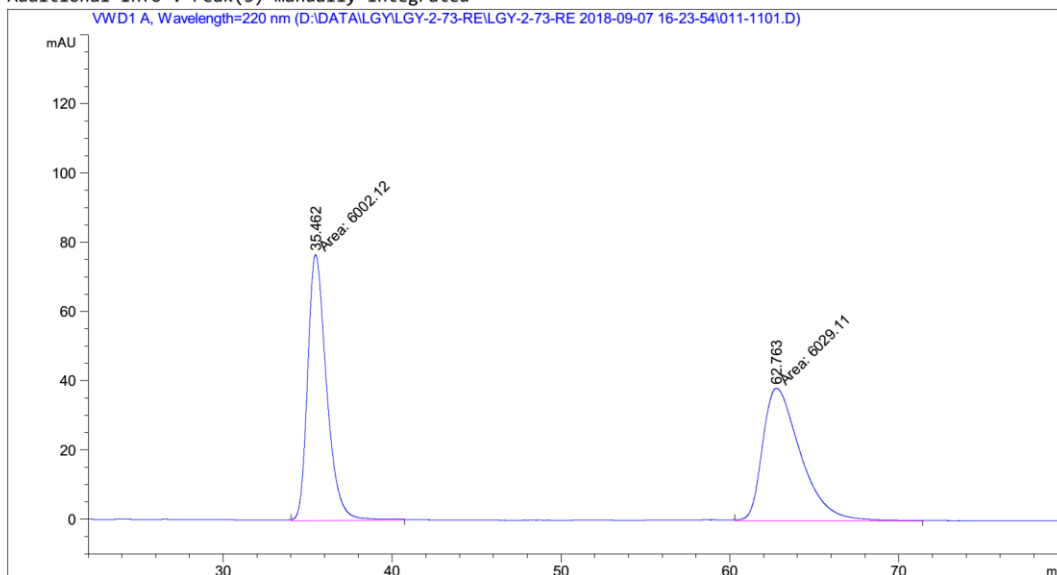

## Area Percent Report

```

Sorted By      :      Retention Time
Multiplier     :      1.0000
Dilution       :      1.0000
Use Multiplier & Dilution Factor with ISTDs
  
```

Signal 1: VWD1 A, Wavelength=220 nm

| Peak # | RetTime [min] | Sig | Type | Area [mAU*s] | Height [mAU] | Area %  |
|--------|---------------|-----|------|--------------|--------------|---------|
| 1      | 35.462        | 1   | MM   | 6002.12256   | 76.84860     | 49.8878 |
| 2      | 62.763        | 1   | MM   | 6029.10986   | 38.34726     | 50.1122 |

Totals :                    1.20312e4    115.19587

# HPLC of 2s

Data File D:\DATA\LGY\LGY-2-73-RE\LGY-2-73-RE 2018-09-07 16-23-54\042-3401.D  
 Sample Name: LGY-2-73-10

```

=====
Acq. Operator   :                               Seq. Line :   34
Acq. Instrument : Instrument 1                   Location  : Vial 42
Injection Date  : 9/8/2018 11:41:08 PM          Inj       :    1
                                                    Inj Volume: 5.000 µl

Acq. Method     : D:\DATA\LGY\LGY-2-73-RE\LGY-2-73-RE 2018-09-07 16-23-54\VWD-AS(1-6)-80-20-
                  1ML-5UL-220NM-80MIN.M
Last changed    : 9/8/2018 10:08:46 PM
                  (modified after loading)
Analysis Method : D:\METHOD\LG\VWD-AD(1-2)-99-1-0.2ML-2UL-220NM-10MIN.M
Last changed    : 9/10/2018 10:32:41 PM
                  (modified after loading)
Additional Info  : Peak(s) manually integrated
  
```

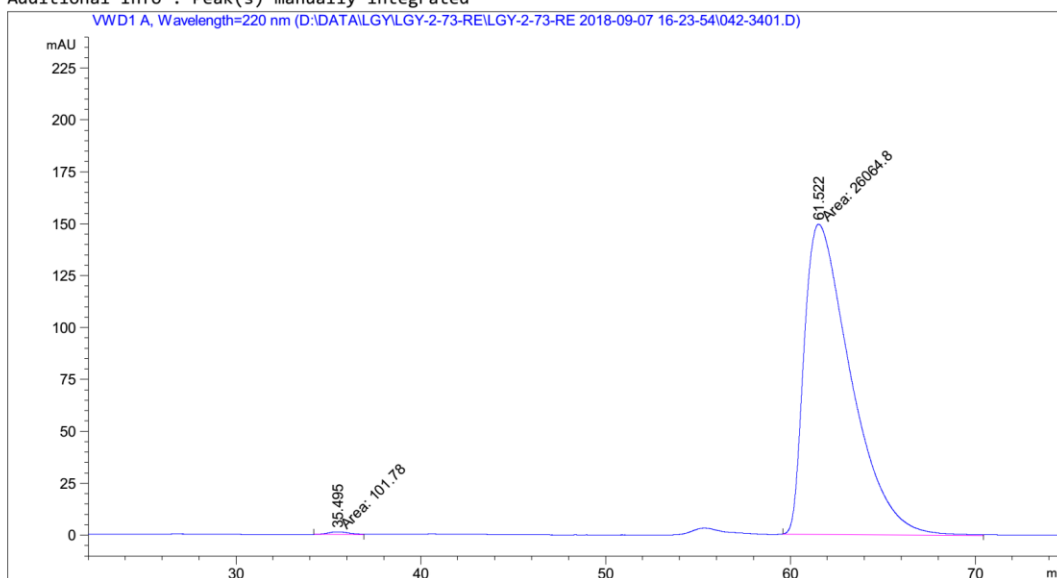

## Area Percent Report

```

Sorted By      :      Retention Time
Multiplier     :      1.0000
Dilution       :      1.0000
Use Multiplier & Dilution Factor with ISTDs
  
```

Signal 1: VWD1 A, Wavelength=220 nm

| Peak # | RetTime [min] | Sig | Type | Area [mAU*s] | Height [mAU] | Area %  |
|--------|---------------|-----|------|--------------|--------------|---------|
| 1      | 35.495        | 1   | MM   | 101.77962    | 1.28853      | 0.3890  |
| 2      | 61.522        | 1   | MM   | 2.60648e4    | 149.35780    | 99.6110 |

Totals :                    2.61665e4    150.64634

# HPLC of racemic-2t

Data File D:\DATA\LGY\GY-2-73-RE\GY-2-73-RE 2018-09-07 16-23-54\005-0601.D  
Sample Name: LGY-2-62-1

```
=====
Acq. Operator   :                               Seq. Line :    6
Acq. Instrument : Instrument 1                   Location  : Vial 5
Injection Date  : 9/7/2018 9:19:02 PM           Inj       :    1
                                                    Inj Volume: 5.000 µl

Acq. Method     : D:\DATA\LGY\GY-2-73-RE\GY-2-73-RE 2018-09-07 16-23-54\VWD-AS(1-6)-80-20-
                  1ML-5UL-220NM-80MIN.M
Last changed    : 5/26/2018 3:44:58 PM
Analysis Method : D:\METHOD\LGY\VWD-AD(1-2)-95-5-0.3ML-5UL-220NM-100MIN.M
Last changed    : 9/10/2018 9:42:43 PM
                  (modified after loading)
Additional Info  : Peak(s) manually integrated
=====
```

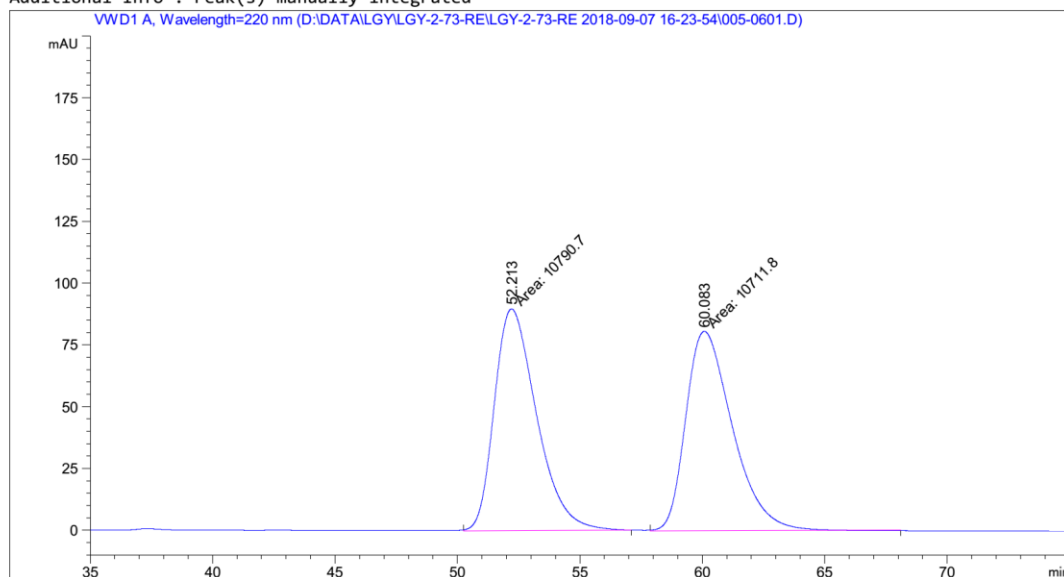

## Area Percent Report

```
Sorted By      :      Retention Time
Multiplier     :      1.0000
Dilution       :      1.0000
Use Multiplier & Dilution Factor with ISTDs
```

Signal 1: VWD1 A, Wavelength=220 nm

| Peak # | RetTime [min] | Sig | Type | Area [mAU*s] | Height [mAU] | Area %  |
|--------|---------------|-----|------|--------------|--------------|---------|
| 1      | 52.213        | 1   | MM   | 1.07907e4    | 89.78436     | 50.1836 |
| 2      | 60.083        | 1   | MM   | 1.07118e4    | 80.76544     | 49.8164 |

Totals :                    2.15025e4    170.54980



# HPLC of 2t

Data File D:\DATA\LGY\LGY-2-73-RE\LGY-2-73-RE 2018-09-07 16-23-54\036-3201.D  
 Sample Name: LGY-2-73-9

```

=====
Acq. Operator   :                               Seq. Line :   32
Acq. Instrument : Instrument 1                   Location  : Vial 36
Injection Date  : 9/8/2018 8:39:25 PM          Inj       :    1
                                                    Inj Volume: 5.000 µl

Acq. Method    : D:\DATA\LGY\LGY-2-73-RE\LGY-2-73-RE 2018-09-07 16-23-54\VWD-AS(1-6)-80-20-
                1ML-5UL-220NM-80MIN.M
Last changed   : 9/8/2018 8:41:54 PM
                (modified after loading)
Analysis Method: D:\METHOD\LG\VWD-AD(1-2)-99-1-0.2ML-2UL-220NM-10MIN.M
Last changed   : 9/10/2018 10:30:13 PM
                (modified after loading)
Additional Info : Peak(s) manually integrated
  
```

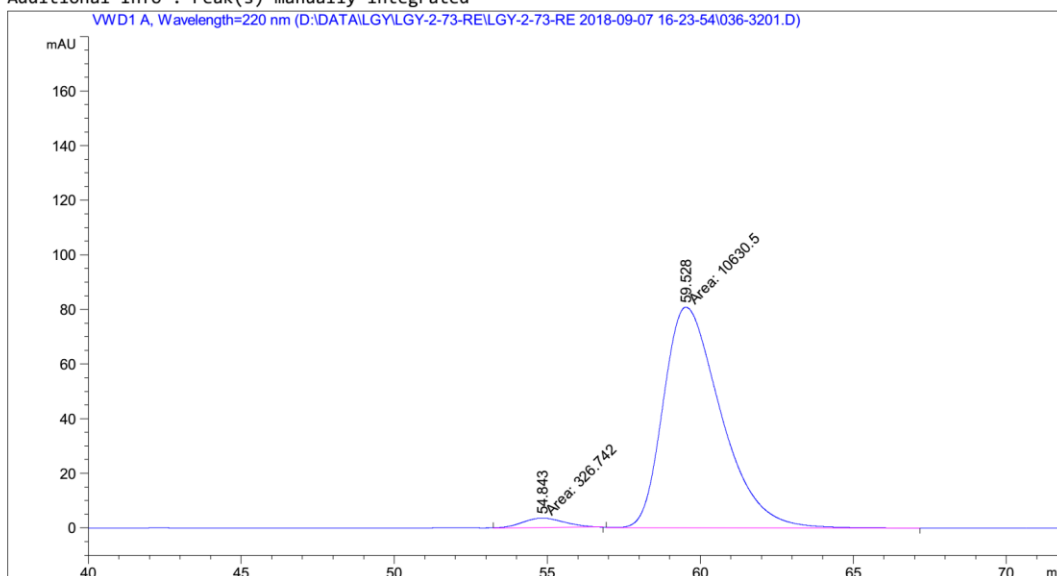

## Area Percent Report

```

Sorted By      :      Retention Time
Multiplier     :      1.0000
Dilution       :      1.0000
Use Multiplier & Dilution Factor with ISTDs
  
```

Signal 1: VWD1 A, Wavelength=220 nm

| Peak # | RetTime [min] | Sig | Type | Area [mAU*s] | Height [mAU] | Area %  |
|--------|---------------|-----|------|--------------|--------------|---------|
| 1      | 54.843        | 1   | MM   | 326.74197    | 3.44832      | 2.9820  |
| 2      | 59.528        | 1   | MM   | 1.06305e4    | 80.87628     | 97.0180 |

Totals :                    1.09572e4    84.32460

# HPLC of racemic-2u

Data File D:\DATA\LGY\LGY-2-73-RE\LGY-2-73-RE 2018-09-07 16-23-54\003-0401.D  
 Sample Name: LGY-2-53-4

```

=====
Acq. Operator   :                               Seq. Line :    4
Acq. Instrument : Instrument 1                   Location  : Vial 3
Injection Date  : 9/7/2018 6:37:24 PM          Inj       :    1
                                                    Inj Volume: 5.000 µl

Acq. Method     : D:\DATA\LGY\LGY-2-73-RE\LGY-2-73-RE 2018-09-07 16-23-54\VWD-AS(1-6)-80-20-
                  1ML-5UL-220NM-80MIN.M
Last changed    : 5/26/2018 3:44:58 PM
Analysis Method : D:\METHOD\LGY\VWD-AD(1-2)-95-5-0.3ML-5UL-220NM-100MIN.M
Last changed    : 9/10/2018 9:36:41 PM
                  (modified after loading)
Additional Info  : Peak(s) manually integrated
  
```

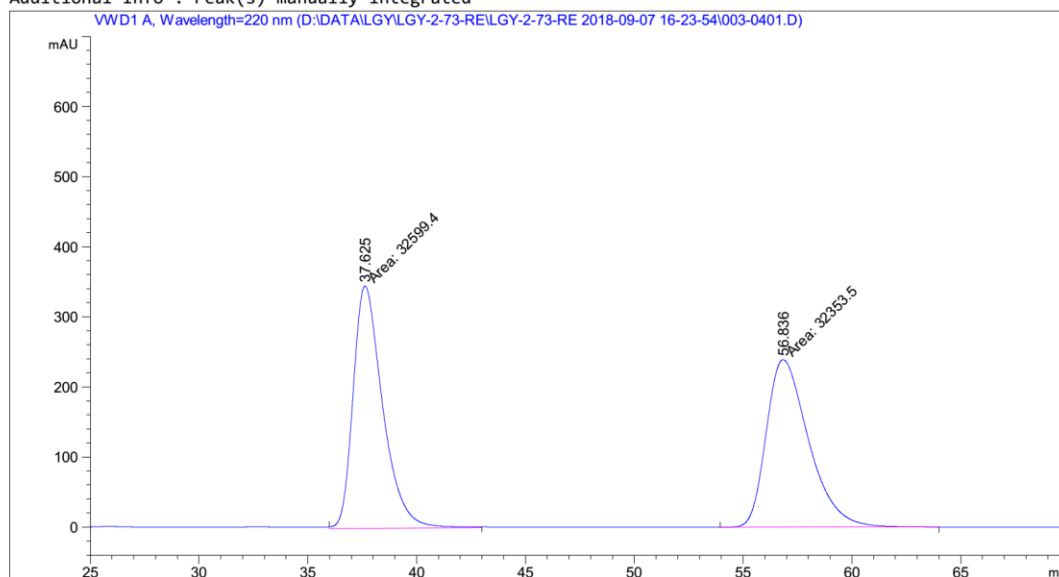

## Area Percent Report

```

Sorted By      :      Retention Time
Multiplier     :      1.0000
Dilution       :      1.0000
Use Multiplier & Dilution Factor with ISTDs
  
```

Signal 1: VWD1 A, Wavelength=220 nm

| Peak # | RetTime [min] | Sig | Type | Area [mAU*s] | Height [mAU] | Area %  |
|--------|---------------|-----|------|--------------|--------------|---------|
| 1      | 37.625        | 1   | MM   | 3.25994e4    | 345.56903    | 50.1893 |
| 2      | 56.836        | 1   | MM   | 3.23535e4    | 238.93916    | 49.8107 |

Totals :                    6.49529e4    584.50819

# HPLC of 2u

Data File D:\DATA\LGY\LGY-2-73-RE\LGY-2-73-RE 2018-09-07 16-23-54\034-3001.D  
 Sample Name: LGY-2-73-8

```

=====
Acq. Operator   :                               Seq. Line :   30
Acq. Instrument : Instrument 1                   Location  : Vial 34
Injection Date  : 9/8/2018 6:13:42 PM          Inj       :    1
                                                    Inj Volume: 5.000 µl

Acq. Method     : D:\DATA\LGY\LGY-2-73-RE\LGY-2-73-RE 2018-09-07 16-23-54\VWD-AS(1-6)-80-20-
                  1ML-5UL-220NM-80MIN.M
Last changed    : 9/8/2018 6:39:09 PM
                  (modified after loading)
Analysis Method : D:\METHOD\LG\VWD-AD(1-2)-99-1-0.2ML-2UL-220NM-10MIN.M
Last changed    : 9/10/2018 10:26:57 PM
                  (modified after loading)
Additional Info  : Peak(s) manually integrated
  
```

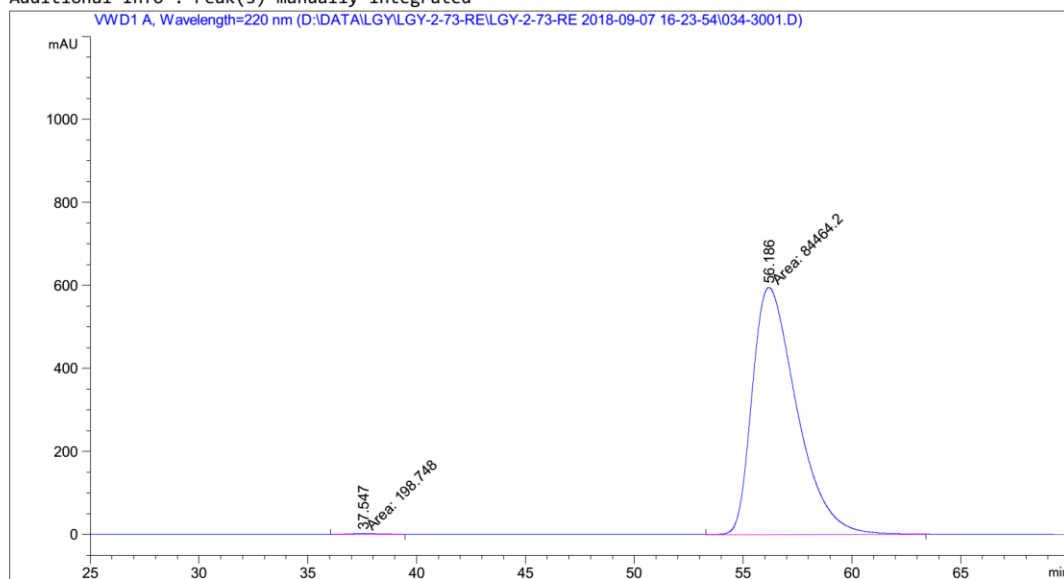

## Area Percent Report

```

Sorted By      :      Retention Time
Multiplier     :      1.0000
Dilution       :      1.0000
Use Multiplier & Dilution Factor with ISTDs
  
```

Signal 1: VWD1 A, Wavelength=220 nm

| Peak # | RetTime [min] | Sig | Type | Area [mAU*s] | Height [mAU] | Area %  |
|--------|---------------|-----|------|--------------|--------------|---------|
| 1      | 37.547        | 1   | MM   | 198.74828    | 2.21174      | 0.2348  |
| 2      | 56.186        | 1   | MM   | 8.44642e4    | 595.49066    | 99.7652 |

Totals :                    8.46630e4   597.70240

# HPLC of racemic-2v

Data File E:\DATA\LGY\GY-1-101\GY-1-101 2018-01-20 15-54-03\041-0301.D  
Sample Name: LGY-1-101

```
=====
Acq. Operator   : SYSTEM                      Seq. Line :    3
Acq. Instrument : 1260HPLC-VWD                Location  : Vial 41
Injection Date  : 1/20/2018 4:36:17 PM        Inj       :    1
                                           Inj Volume: 3.000 µl
Acq. Method     : E:\DATA\LGY\GY-1-101\GY-1-101 2018-01-20 15-54-03\VWD-AD (1-2)-95-5-1ML
                 -3UL-220NM-60MIN.M
Last changed    : 1/20/2018 3:54:03 PM by SYSTEM
Analysis Method : E:\DATA\LGY\GY-1-101\GY-1-101 2018-01-20 15-54-03\VWD-AD (1-2)-95-5-1ML
                 -3UL-220NM-60MIN.M (Sequence Method)
Last changed    : 4/14/2018 8:00:08 PM by SYSTEM
                 (modified after loading)
Additional Info : Peak(s) manually integrated
=====
```

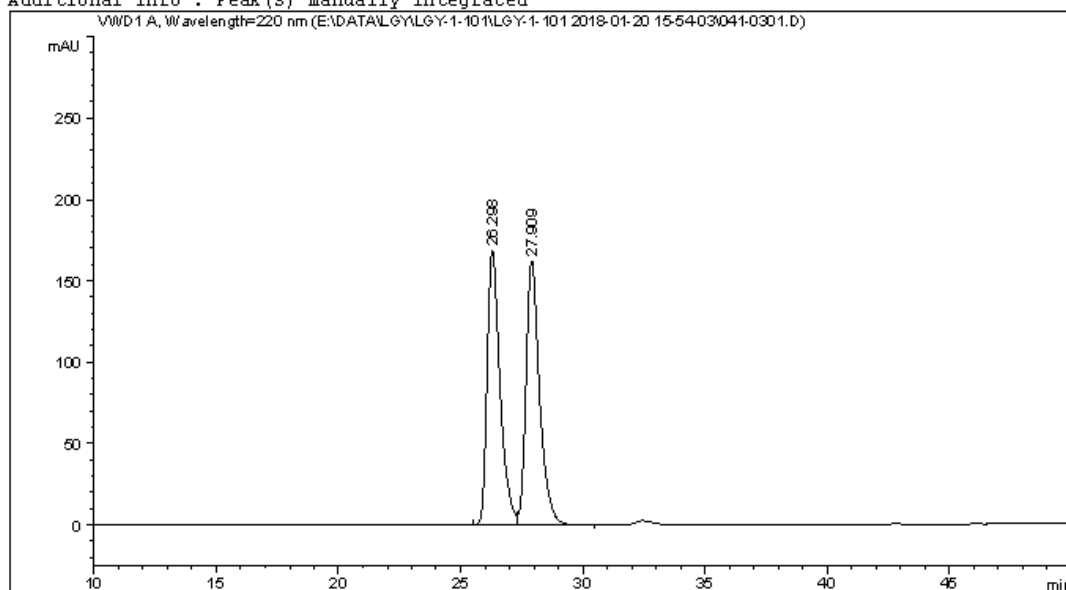

## Area Percent Report

```
Sorted By      : Signal
Multiplier     : 1.0000
Dilution       : 1.0000
Do not use Multiplier & Dilution Factor with ISTDs
```

Signal 1: VWD1 A, Wavelength=220 nm

| Peak # | RetTime [min] | Type | Width [min] | Area [mAU*s] | Height [mAU] | Area %  |
|--------|---------------|------|-------------|--------------|--------------|---------|
| 1      | 26.298        | BV   | 0.5487      | 6153.86182   | 168.66835    | 49.6834 |
| 2      | 27.909        | VB   | 0.5753      | 6232.27979   | 162.20204    | 50.3166 |

Totals : 1.23861e4 330.87039

\*\*\* End of Report \*\*\*

# HPLC of 2v

Data File E:\DATA\LGY\LGY-1-101\LGY-1-101 2018-01-20 15-54-03\042-0401.D  
Sample Name: LGY-1-99-6

```
=====
Acq. Operator   : SYSTEM                               Seq. Line :    4
Acq. Instrument : 1260HPLC-VWD                         Location  : Vial 42
Injection Date  : 1/20/2018 5:37:01 PM                 Inj       :    1
                                                    Inj Volume: 3.000 µl
Acq. Method     : E:\DATA\LGY\LGY-1-101\LGY-1-101 2018-01-20 15-54-03\VWD-AD(1-2)-95-5-1ML
                  -3UL-220NM-60MIN.M
Last changed    : 1/20/2018 3:54:03 PM by SYSTEM
Analysis Method : E:\DATA\LGY\LGY-1-101\LGY-1-101 2018-01-20 15-54-03\VWD-AD(1-2)-95-5-1ML
                  -3UL-220NM-60MIN.M (Sequence Method)
Last changed    : 4/14/2018 8:06:25 PM by SYSTEM
                  (modified after loading)
Additional Info : Peak(s) manually integrated
=====
```

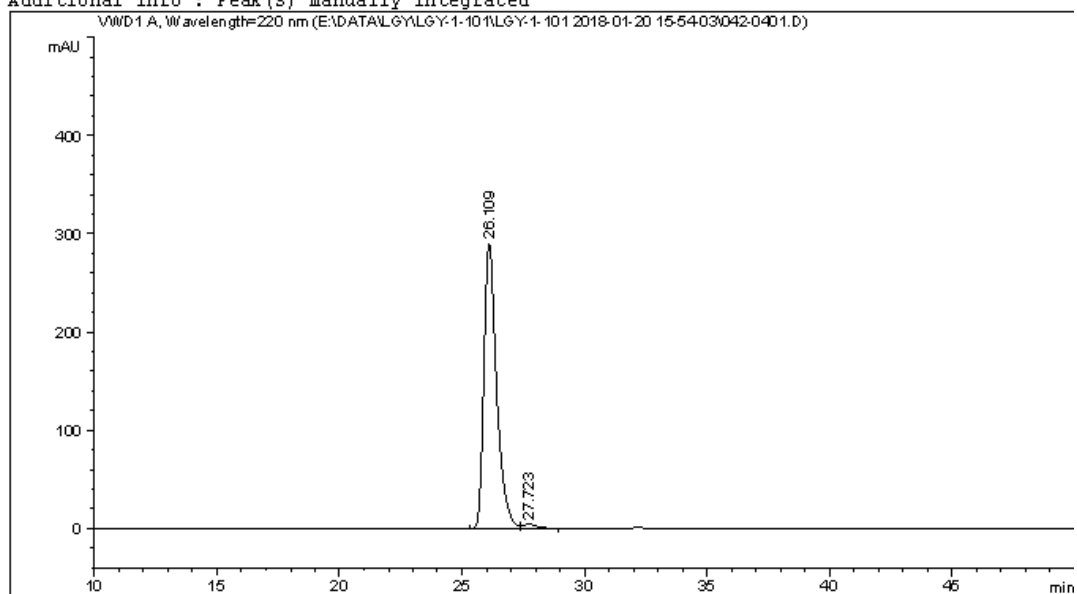

## Area Percent Report

```
Sorted By      : Signal
Multiplier     : 1.0000
Dilution       : 1.0000
Do not use Multiplier & Dilution Factor with ISTDs
```

Signal 1: VWD1 A, Wavelength=220 nm

| Peak # | RetTime [min] | Type | Width [min] | Area [mAU*s] | Height [mAU] | Area %  |
|--------|---------------|------|-------------|--------------|--------------|---------|
| 1      | 26.109        | BV   | 0.5409      | 1.04457e4    | 290.20370    | 98.5545 |
| 2      | 27.723        | VB   | 0.5486      | 153.20755    | 4.02011      | 1.4455  |

Totals : 1.05989e4 294.22382

\*\*\* End of Report \*\*\*

# HPLC of racemic-2w

Data File D:\DATA\LGY\LGY-2-73-RE\LGY-2-73-RE 2018-09-07 16-23-54\013-1401.D  
 Sample Name: LGY-2-35-1

```

=====
Acq. Operator   :                               Seq. Line :   14
Acq. Instrument : Instrument 1                   Location  : Vial 13
Injection Date  : 9/8/2018 4:36:06 AM           Inj       :    1
                                                    Inj Volume: 5.000 µl

Acq. Method     : D:\DATA\LGY\LGY-2-73-RE\LGY-2-73-RE 2018-09-07 16-23-54\VWD-AD(1-2)-95-5-0.
                  3ML-5UL-220NM-100MIN.M
Last changed    : 9/7/2018 3:24:25 PM
Analysis Method : D:\METHOD\LGY\VWD-AD(1-2)-95-5-0.3ML-5UL-220NM-100MIN.M
Last changed    : 9/10/2018 9:53:01 PM
                  (modified after loading)
Additional Info : Peak(s) manually integrated
  
```

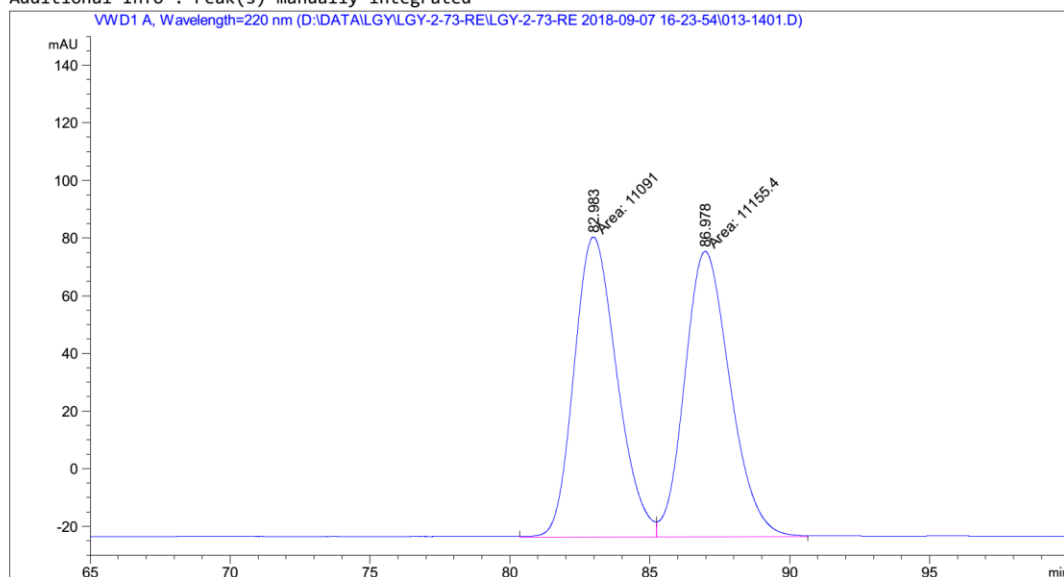

## Area Percent Report

```

Sorted By      :      Retention Time
Multiplier     :      1.0000
Dilution       :      1.0000
Use Multiplier & Dilution Factor with ISTDs
  
```

Signal 1: VWD1 A, Wavelength=220 nm

| Peak # | RetTime [min] | Sig | Type | Area [mAU*s] | Height [mAU] | Area %  |
|--------|---------------|-----|------|--------------|--------------|---------|
| 1      | 82.983        | 1   | MF   | 1.10910e4    | 104.12796    | 49.8553 |
| 2      | 86.978        | 1   | FM   | 1.11554e4    | 99.01752     | 50.1447 |

Totals :                    2.22464e4    203.14548

# HPLC of 2w

Data File D:\DATA\LGY\GY-2-73-RE\GY-2-73-RE 2018-09-07 16-23-54\044-3701.D  
Sample Name: LGY-2-73-11

```
=====
Acq. Operator   :                               Seq. Line :   37
Acq. Instrument : Instrument 1                   Location  : Vial 44
Injection Date  : 9/9/2018 3:13:50 AM           Inj       :    1
                                                    Inj Volume: 5.000 µl

Acq. Method    : D:\DATA\LGY\GY-2-73-RE\GY-2-73-RE 2018-09-07 16-23-54\VWD-AD(1-2)-95-5-0.
                3ML-5UL-220NM-100MIN.M
Last changed   : 9/7/2018 3:24:25 PM
Analysis Method: D:\METHOD\LG\VWD-AD(1-2)-99-1-0.2ML-2UL-220NM-10MIN.M
Last changed   : 9/10/2018 10:35:32 PM
                (modified after loading)
Additional Info : Peak(s) manually integrated
=====
```

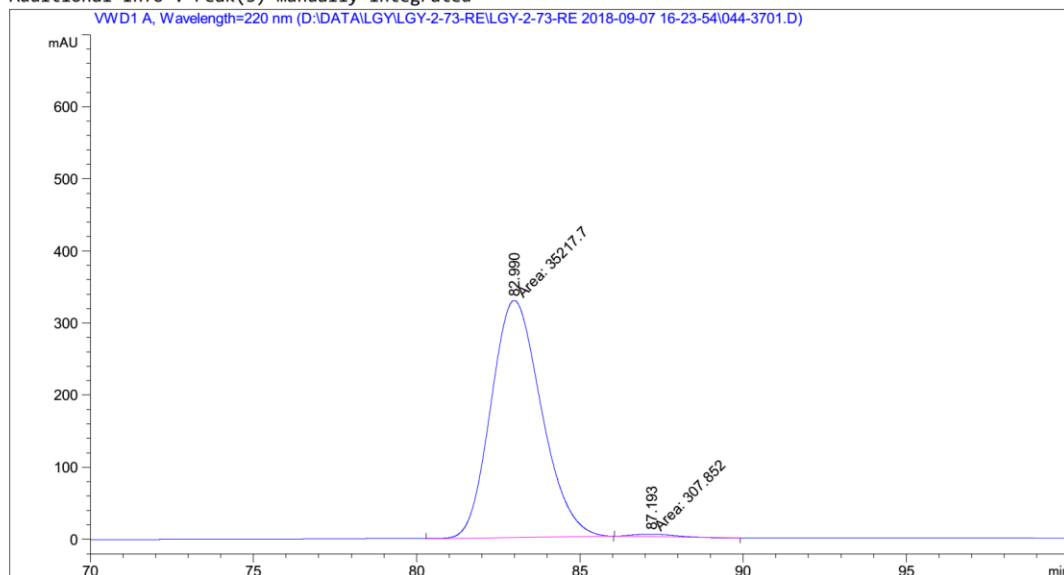

## Area Percent Report

```
Sorted By      :      Retention Time
Multiplier     :      1.0000
Dilution       :      1.0000
Use Multiplier & Dilution Factor with ISTDs
```

Signal 1: VWD1 A, Wavelength=220 nm

| Peak # | RetTime [min] | Sig | Type | Area [mAU*s] | Height [mAU] | Area %  |
|--------|---------------|-----|------|--------------|--------------|---------|
| 1      | 82.990        | 1   | MM   | 3.52177e4    | 328.70041    | 99.1334 |
| 2      | 87.193        | 1   | MM   | 307.85239    | 3.58854      | 0.8666  |

Totals :                    3.55255e4    332.28895

# HPLC of racemic-2x

Data File D:\DATA\LGY\GY-2-73-RE\GY-2-73-RE 2018-09-07 16-23-54\015-1601.D  
 Sample Name: LGY-2-64

```

=====
Acq. Operator   :                               Seq. Line :   16
Acq. Instrument : Instrument 1                  Location  : Vial 15
Injection Date  : 9/8/2018 7:57:49 AM         Inj       :    1
                                                Inj Volume: 5.000 µl

Acq. Method    : D:\DATA\LGY\GY-2-73-RE\GY-2-73-RE 2018-09-07 16-23-54\VWD-AD(1-2)-95-5-0.
                3ML-5UL-220NM-90MIN.M
Last changed   : 6/14/2018 9:07:28 PM
Analysis Method: D:\METHOD\LG\VWD-AD(1-2)-99-1-0.2ML-2UL-220NM-10MIN.M
Last changed   : 9/10/2018 10:17:07 PM
                (modified after loading)
Additional Info : Peak(s) manually integrated
  
```

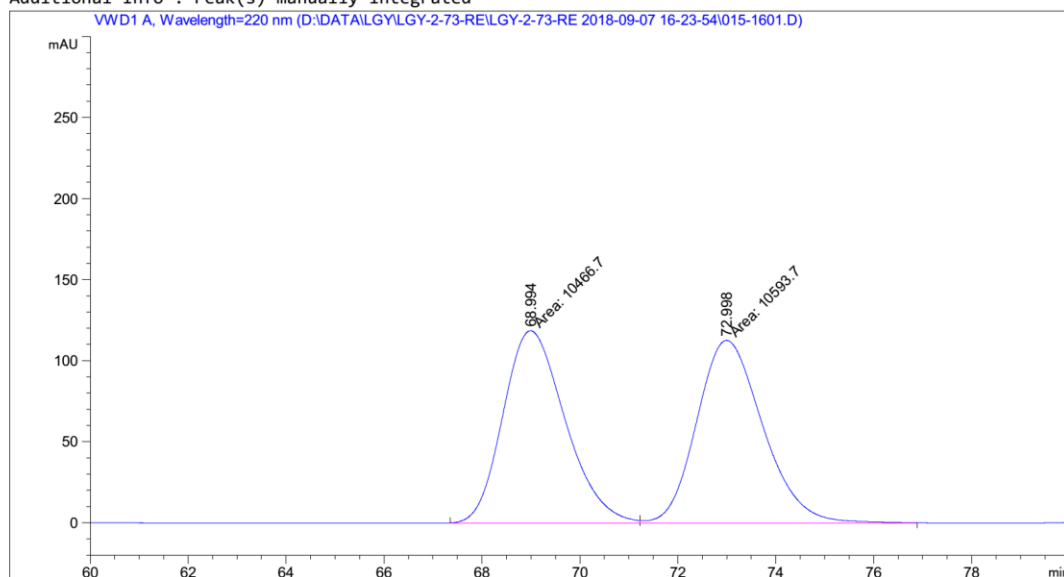

## Area Percent Report

```

Sorted By      :      Retention Time
Multiplier     :      1.0000
Dilution       :      1.0000
Use Multiplier & Dilution Factor with ISTDs
  
```

Signal 1: VWD1 A, Wavelength=220 nm

| Peak # | RetTime [min] | Sig | Type | Area [mAU*s] | Height [mAU] | Area %  |
|--------|---------------|-----|------|--------------|--------------|---------|
| 1      | 68.994        | 1   | MF   | 1.04667e4    | 118.64645    | 49.6986 |
| 2      | 72.998        | 1   | FM   | 1.05937e4    | 112.75227    | 50.3014 |

Totals :                    2.10604e4    231.39873



# HPLC of 2x

Data File D:\DATA\LGY\GY-2-73-RE\GY-2-73-RE 2018-09-07 16-23-54\046-3901.D  
 Sample Name: LGY-2-73-12

```

=====
Acq. Operator   :                               Seq. Line :   39
Acq. Instrument : Instrument 1                 Location  : Vial 46
Injection Date  : 9/9/2018 6:25:37 AM        Inj       :    1
                                                Inj Volume: 5.000 µl

Acq. Method    : D:\DATA\LGY\GY-2-73-RE\GY-2-73-RE 2018-09-07 16-23-54\VWD-AD(1-2)-95-5-0.
                3ML-5UL-220NM-90MIN.M
Last changed   : 6/14/2018 9:07:28 PM
Analysis Method: D:\METHOD\LG\VWD-AD(1-2)-99-1-0.2ML-2UL-220NM-10MIN.M
Last changed   : 9/10/2018 10:38:13 PM
                (modified after loading)
Additional Info : Peak(s) manually integrated
  
```

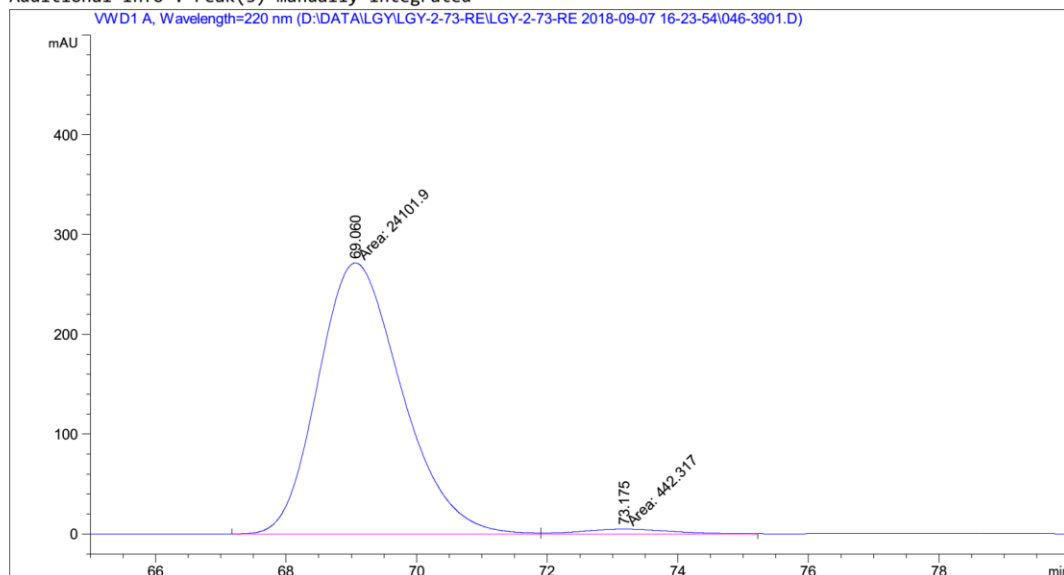

## Area Percent Report

```

Sorted By      :      Retention Time
Multiplier     :      1.0000
Dilution       :      1.0000
Use Multiplier & Dilution Factor with ISTDs
  
```

Signal 1: VWD1 A, Wavelength=220 nm

| Peak # | RetTime [min] | Sig | Type | Area [mAU*s] | Height [mAU] | Area %  |
|--------|---------------|-----|------|--------------|--------------|---------|
| 1      | 69.060        | 1   | MF   | 2.41019e4    | 271.55933    | 98.1979 |
| 2      | 73.175        | 1   | FM   | 442.31656    | 4.69764      | 1.8021  |

Totals :                    2.45442e4    276.25696

# HPLC of racemic-4a

Data File D:\DATA\LGY\LGY-2-155-(2)\LGY-2-155-(2) 2018-11-26 09-15-18\001-0201.D  
 Sample Name: LGY-2-155

```

=====
Acq. Operator   :                               Seq. Line :    2
Acq. Instrument : Instrument 2                   Location  : Vial 1
Injection Date  : 11/26/2018 9:28:20 AM         Inj       :    1
                                                Inj Volume: 5.000 µl

Acq. Method     : D:\DATA\LGY\LGY-2-155-(2)\LGY-2-155-(2) 2018-11-26 09-15-18\DAD-OD(1-2)-90-
                  10-1ML-5UL-ALL-80MIN.M
Last changed    : 5/26/2018 3:40:32 PM
Analysis Method : D:\METHOD\TL\DAD-0J(1-6)-80-20-1ML-3UL-ALL-10MIN.M
Last changed    : 12/4/2018 9:40:39 AM
                  (modified after loading)
Additional Info : Peak(s) manually integrated
  
```

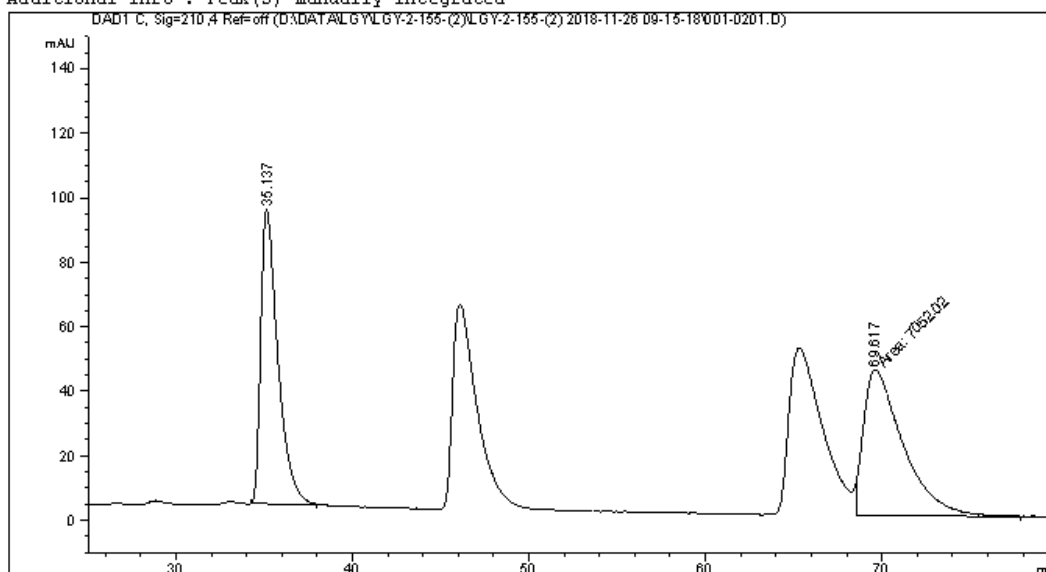

## Area Percent Report

```

=====
Sorted By      :      Signal
Multiplier     :      1.0000
Dilution      :      1.0000
Use Multiplier & Dilution Factor with ISTDs
  
```

Signal 1: DAD1 C, Sig=210,4 Ref=off

| Peak # | RetTime [min] | Type | Width [min] | Area [mAU*s] | Height [mAU] | Area %  |
|--------|---------------|------|-------------|--------------|--------------|---------|
| 1      | 35.137        | BB   | 0.8992      | 6142.91992   | 91.04142     | 46.5551 |
| 2      | 69.617        | FM   | 2.6029      | 7052.02148   | 45.15573     | 53.4449 |

Totals :                                    1.31949e4    136.19715

# HPLC of 4a

Data File D:\DATA\LYH\LYH-3-606\LYH-3-606 2018-12-03 15-33-42\011-0601.D  
Sample Name: LGY-3-14-1

```
=====
Acq. Operator   :                               Seq. Line :    6
Acq. Instrument : Instrument 2                   Location  : Vial 11
Injection Date  : 12/3/2018 5:16:10 PM          Inj       :    1
                                                    Inj Volume: 5.000 µl

Acq. Method     : D:\DATA\LYH\LYH-3-606\LYH-3-606 2018-12-03 15-33-42\DAD-OD(1-2)-90-10-1ML-
                  SUL-ALL-80MIN.M
Last changed    : 5/26/2018 3:40:32 PM
Analysis Method : D:\METHOD\TL\DAD-0J(1-6)-80-20-1ML-3UL-ALL-10MIN.M
Last changed    : 12/3/2018 8:08:37 PM
                  (modified after loading)
Additional Info : Peak(s) manually integrated
=====
```

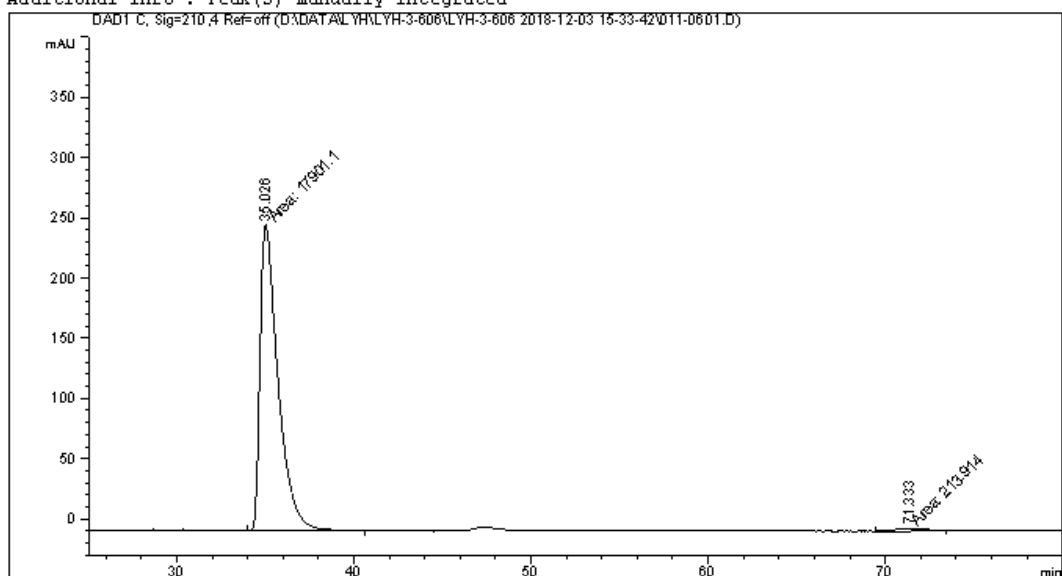

## Area Percent Report

```
Sorted By      :      Signal
Multiplier     :      1.0000
Dilution       :      1.0000
Use Multiplier & Dilution Factor with ISTDs
```

Signal 1: DAD1 C, Sig=210,4 Ref=off

| Peak # | RetTime [min] | Type | Width [min] | Area [mAU*s] | Height [mAU] | Area %  |
|--------|---------------|------|-------------|--------------|--------------|---------|
| 1      | 35.026        | MM   | 1.1786      | 1.79011e4    | 253.14673    | 98.8191 |
| 2      | 71.333        | MM   | 1.9375      | 213.91446    | 1.84013      | 1.1809  |

Totals :                                    1.81150e4    254.98685
